# Supplementary material for: The Abundant and Unique Transcripts and Alternative Splicing of the Artificially Autododecaploid London Plane (Platanus × acerifolia)
Source: MDPI journal article supplement (doi:10.3390/ijms241914486), 2023-09-23
Supplement: s1 [file s1]

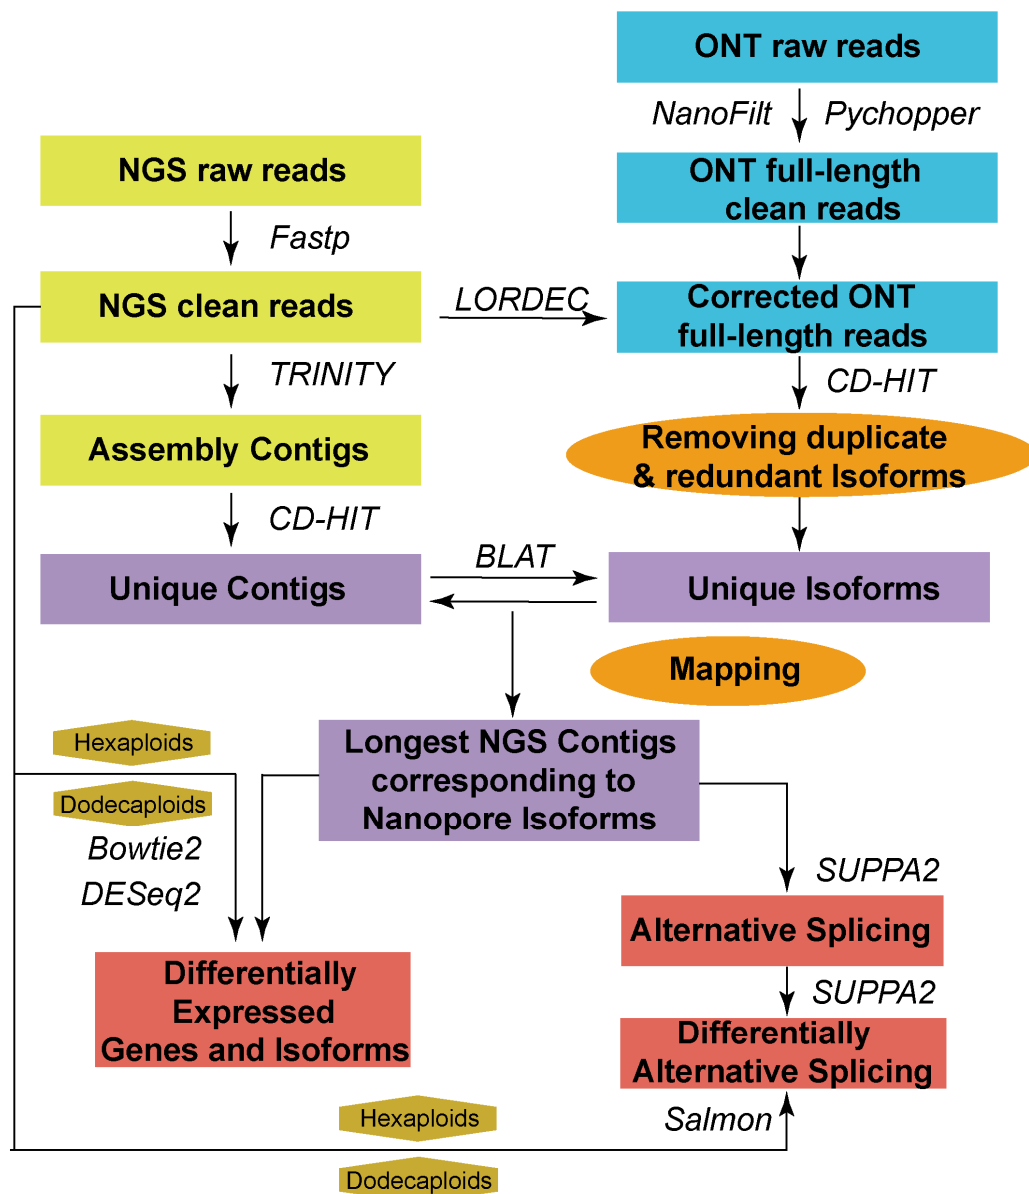

**Figure S1.** Strategy to decipher the splicing and expression in the transcriptome of *Platanus*.

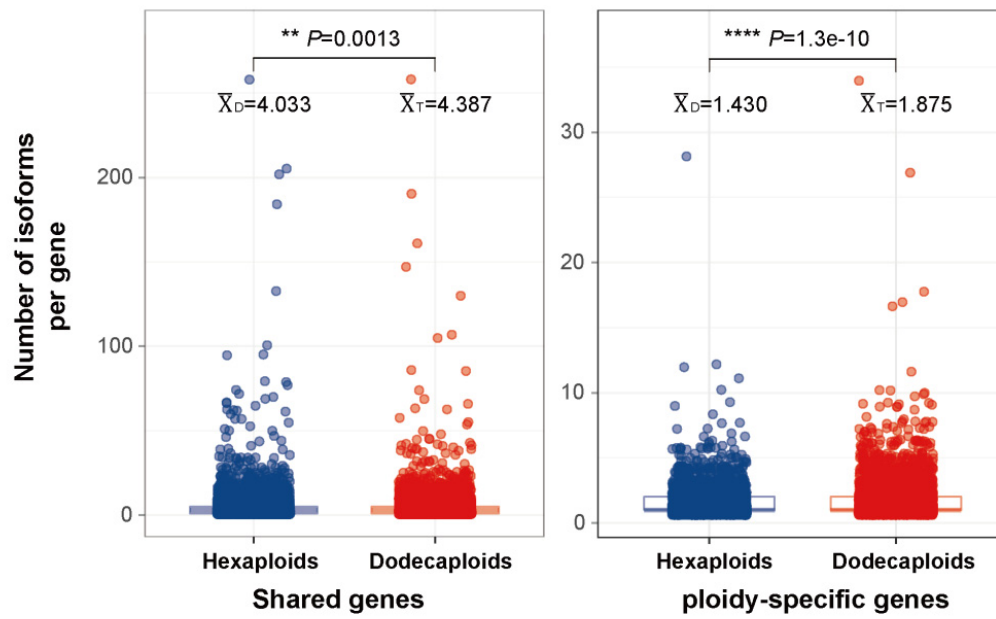

**Figure S2.** Number of isoforms per shared gene and ploidy-specific in hexaploids and dodecaploids.

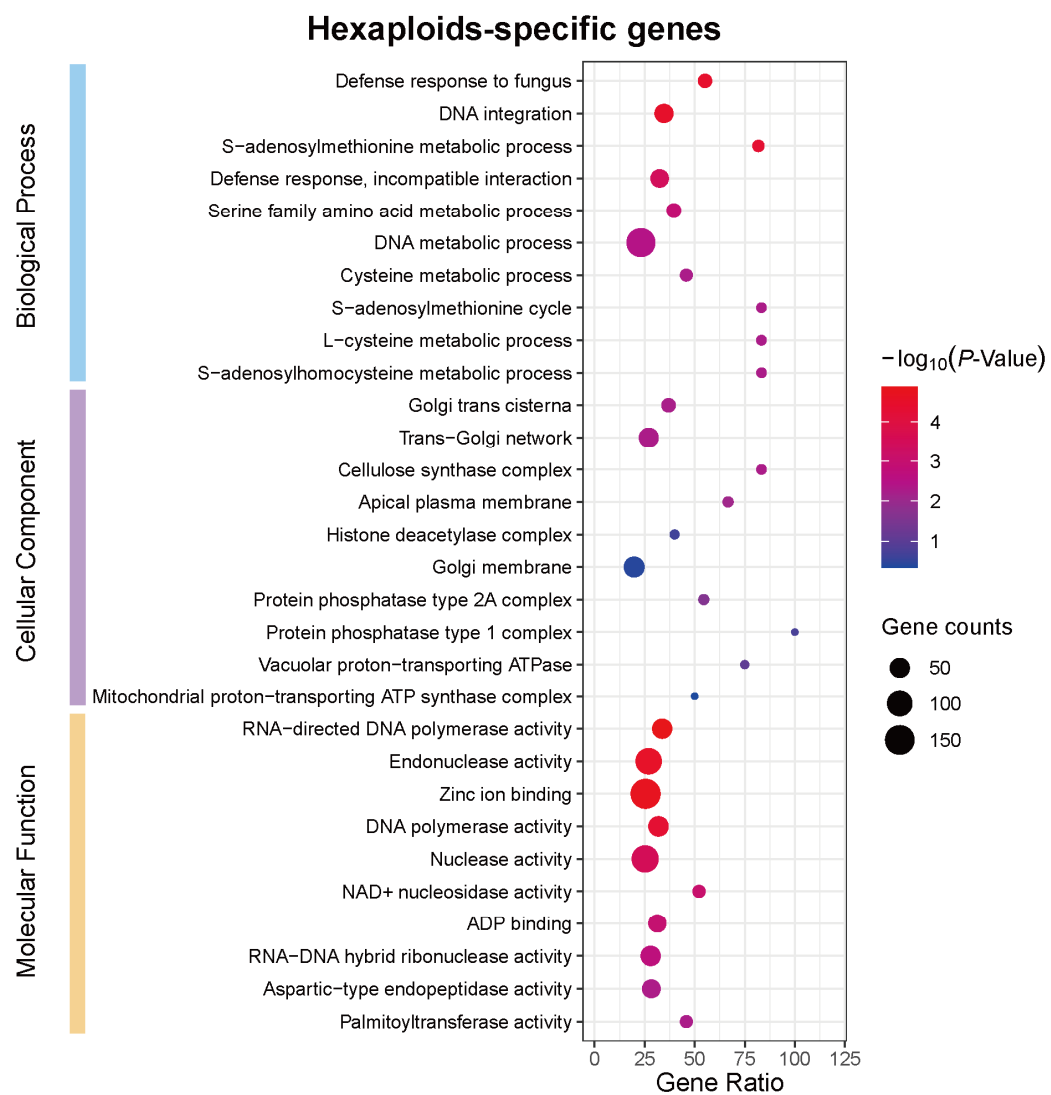

**Figure S3.** The GO terms enrichment analysis of genes specifically transcribed in hexaploids.

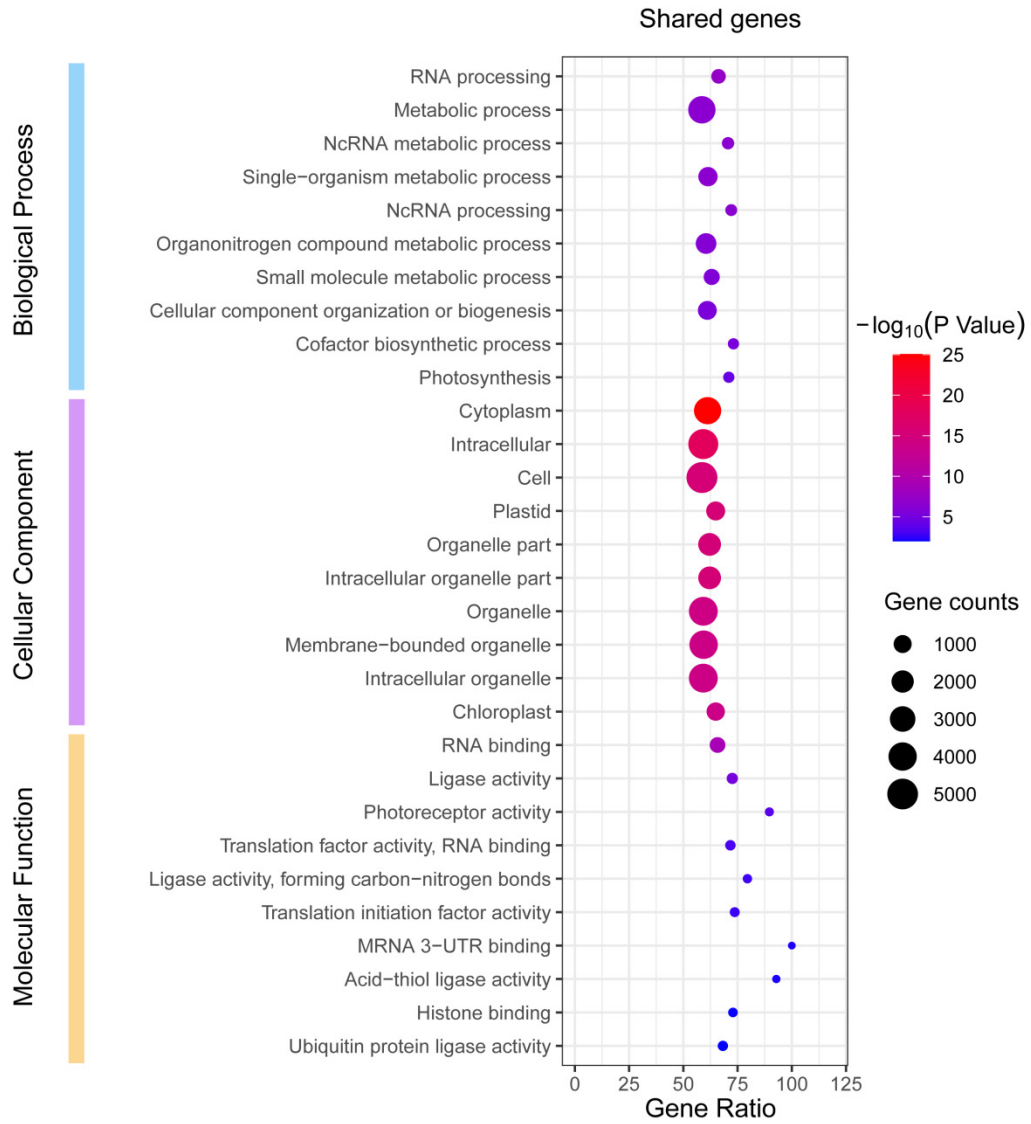

**Figure S4.** The GO terms enrichment analysis of genes transcribed in both hexaploids and dodecaploids.

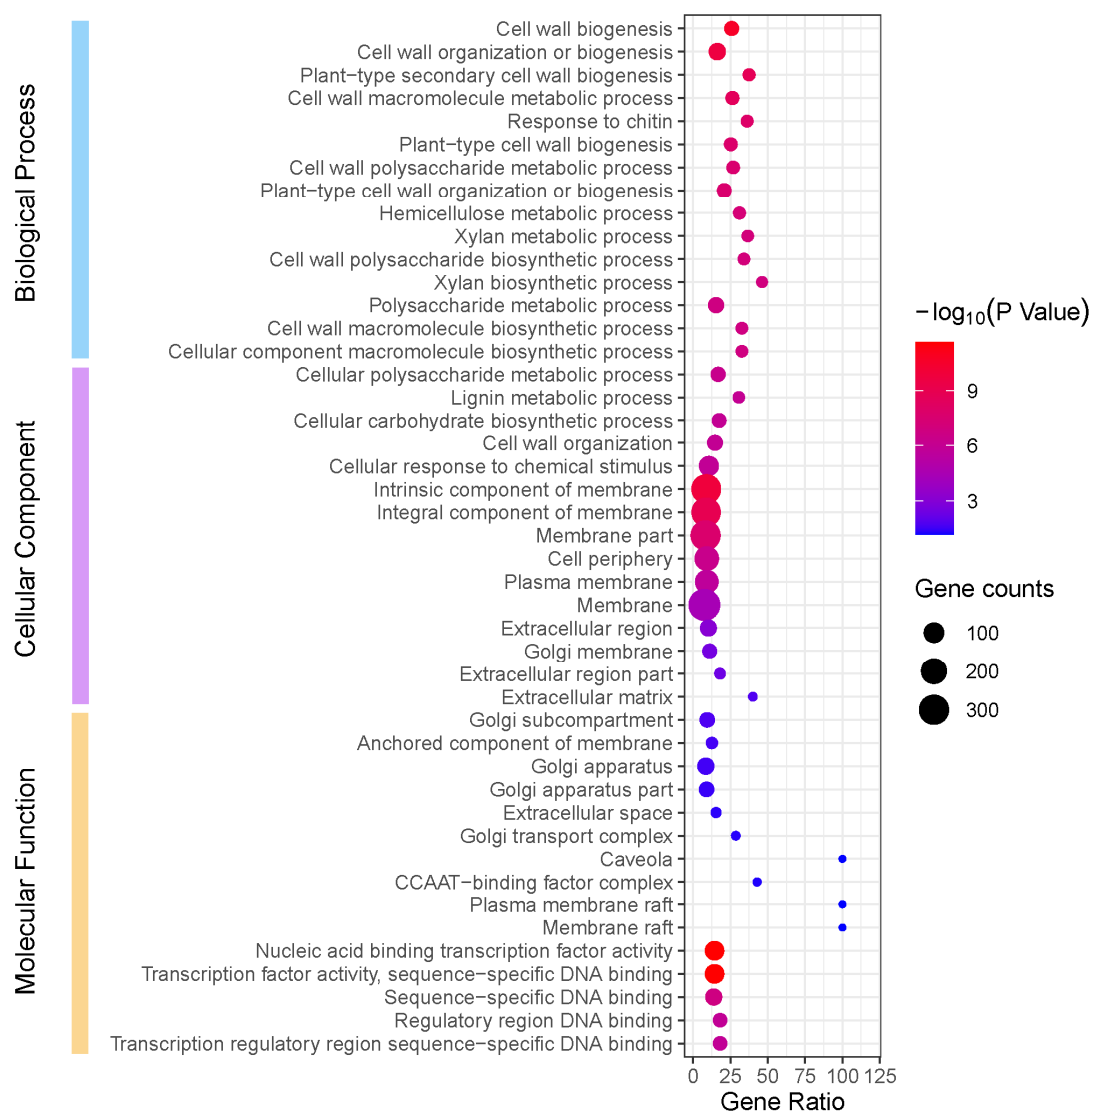

**Figure S5.** The GO terms enrichment analysis of up-regulated DEGs in dodecaploids at Apr. 21<sup>st</sup>.

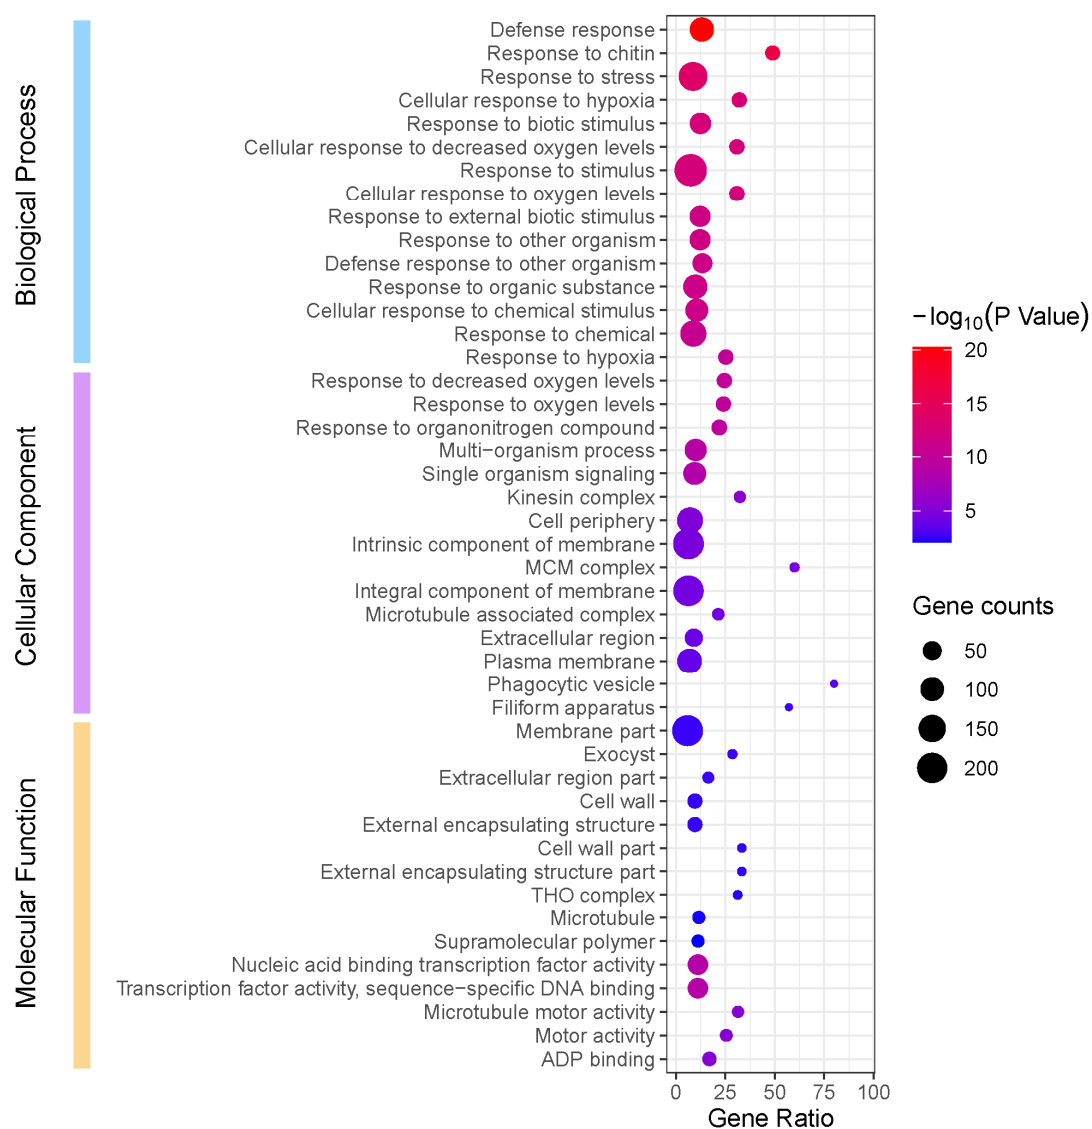

**Figure S6.** The GO terms enrichment analysis of up-regulated DEGs in dodecaploids at May. 05<sup>th</sup>.

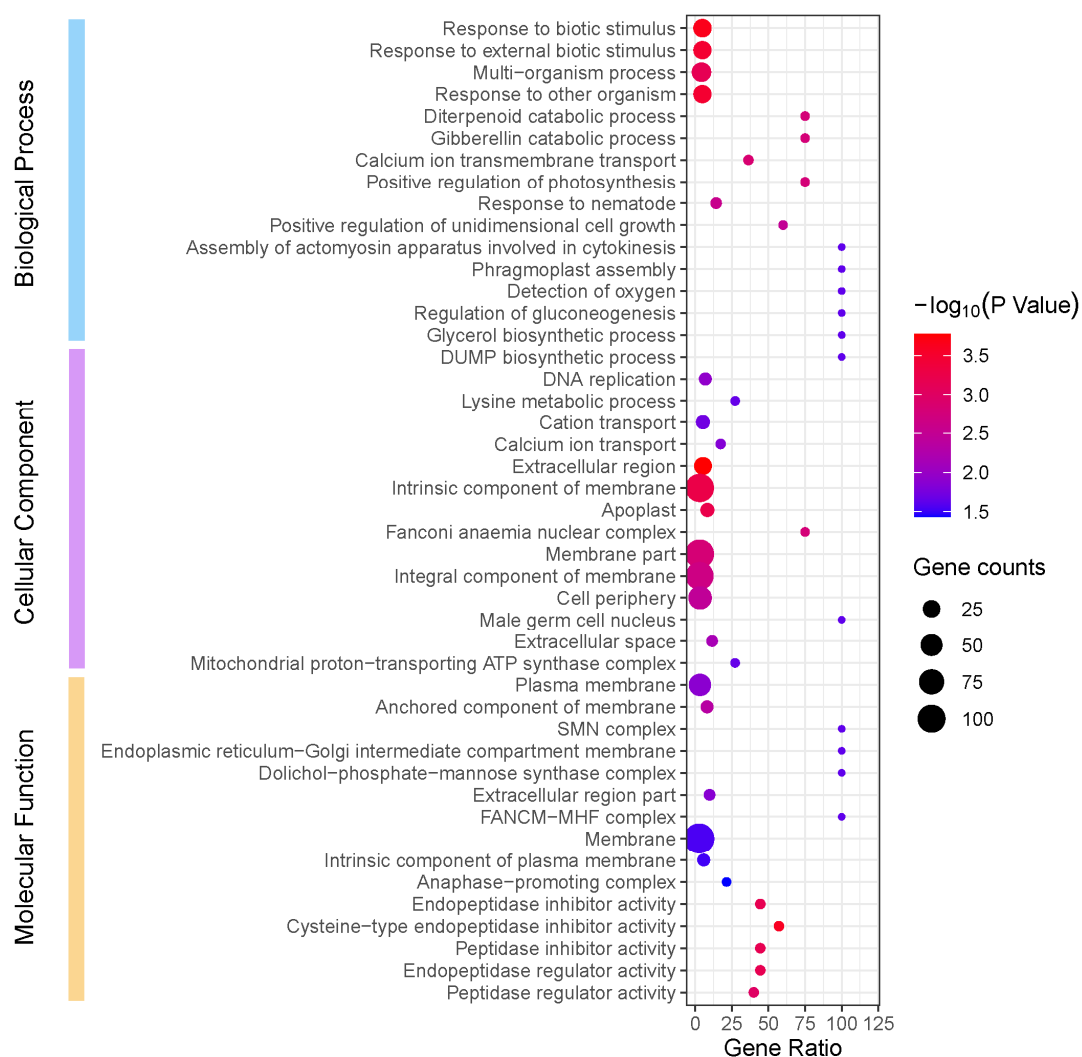

**Figure S7.** The GO terms enrichment analysis of up-regulated DEGs in dodecaploids at May. 20<sup>th</sup>.

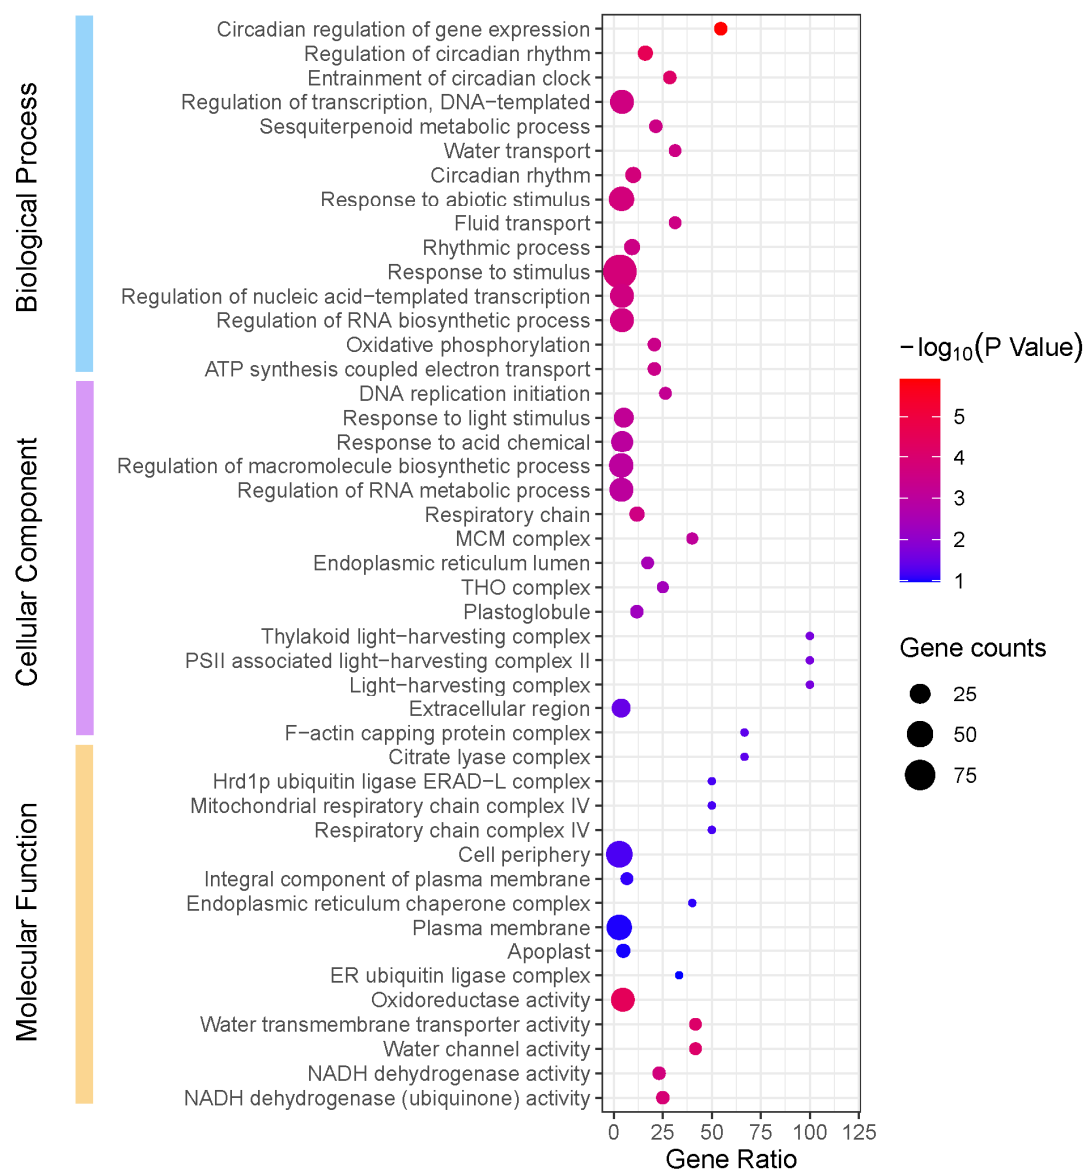

**Figure S8.** The GO terms enrichment analysis of up-regulated DEGs in dodecaploids at Jun. 05<sup>th</sup>.



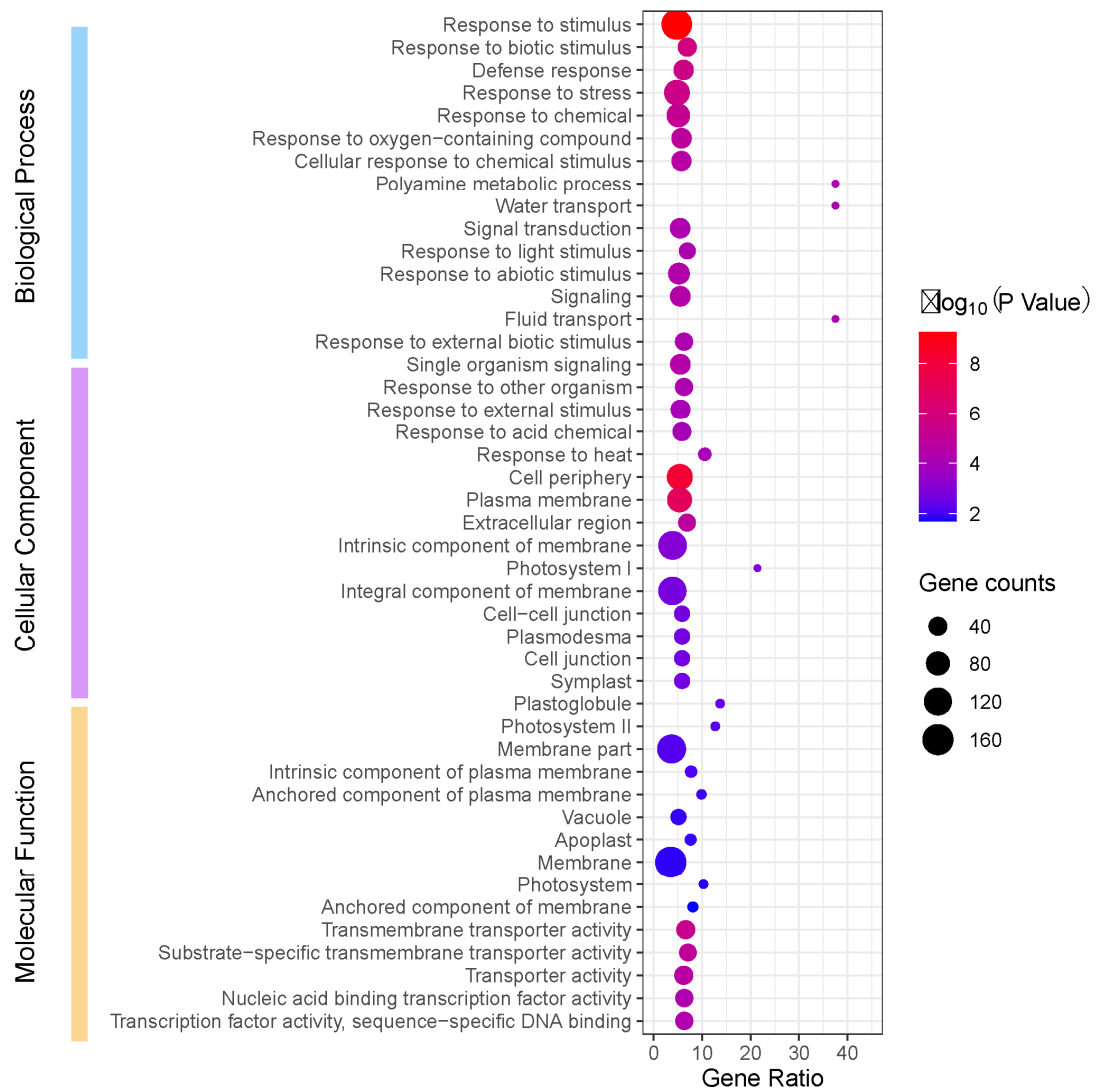

**Figure S9.** The GO terms enrichment analysis of up-regulated DEGs in dodecaploids at Jun. 23rd.

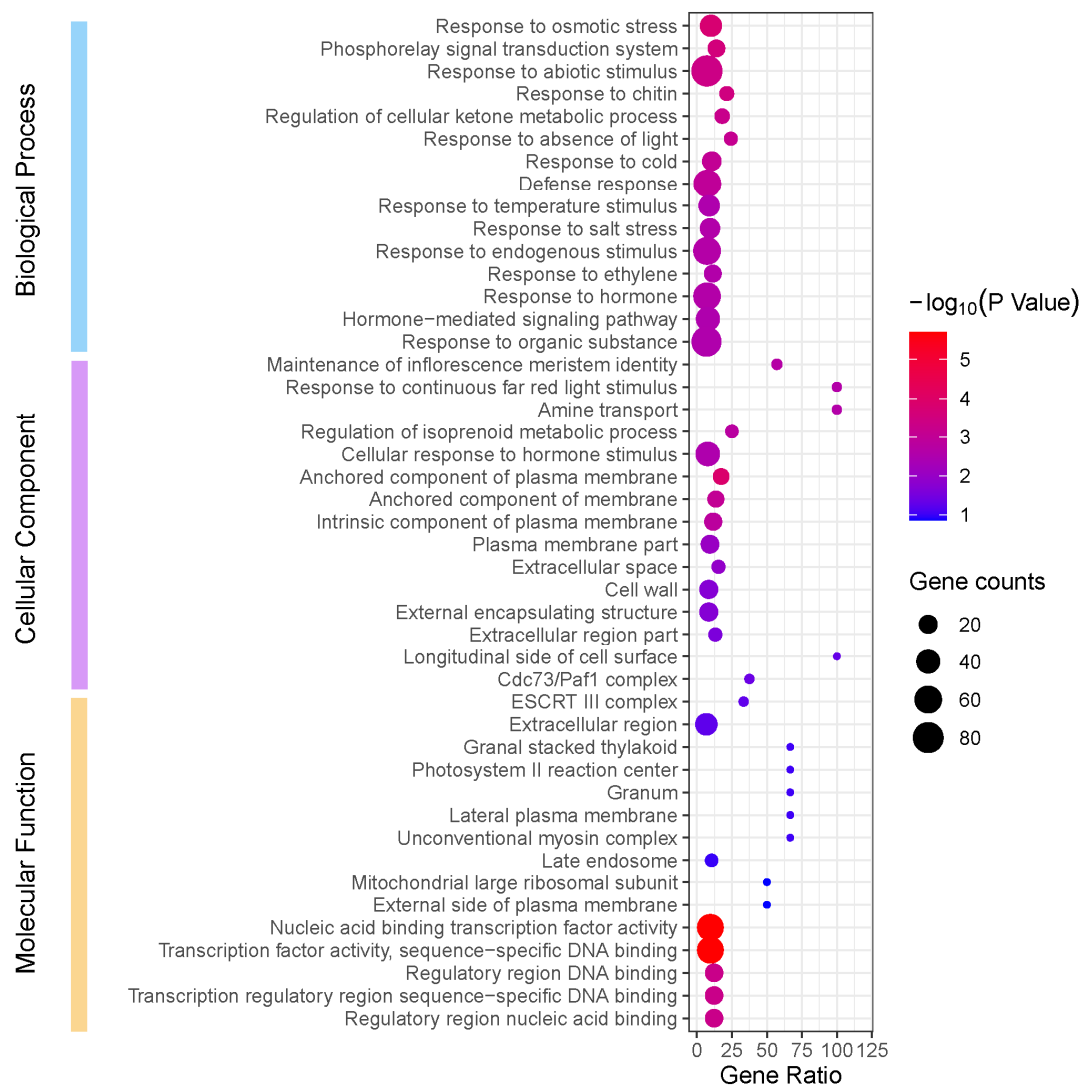

**Figure S10.** The GO terms enrichment analysis of up-regulated DEGs in dodecaploids at Jul. 20<sup>th</sup>.

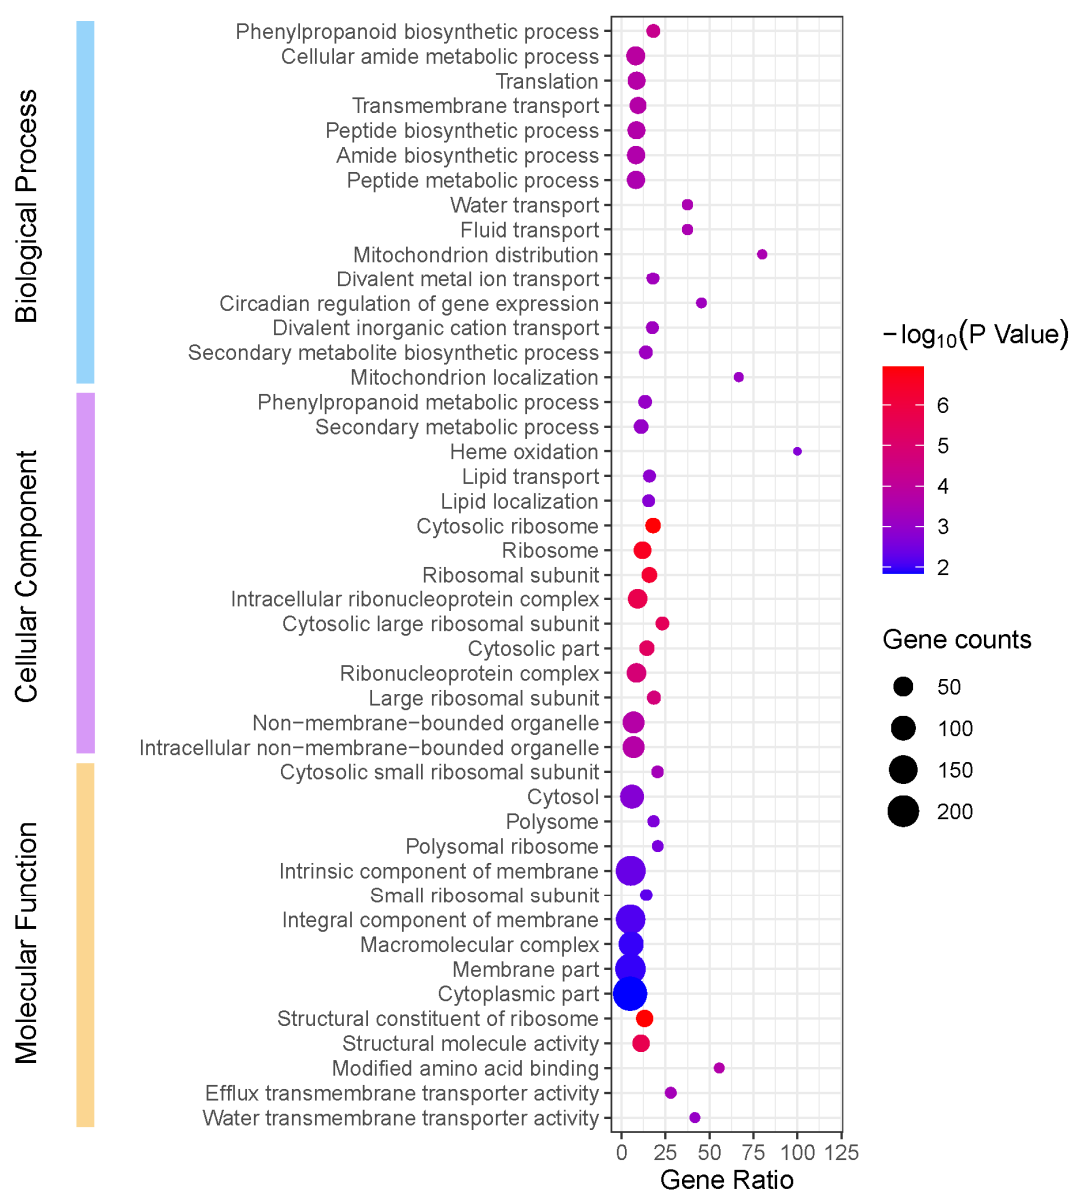

**Figure S11.** The GO terms enrichment analysis of down-regulated DEGs in dodecaploids at Apr. 21<sup>st</sup>.

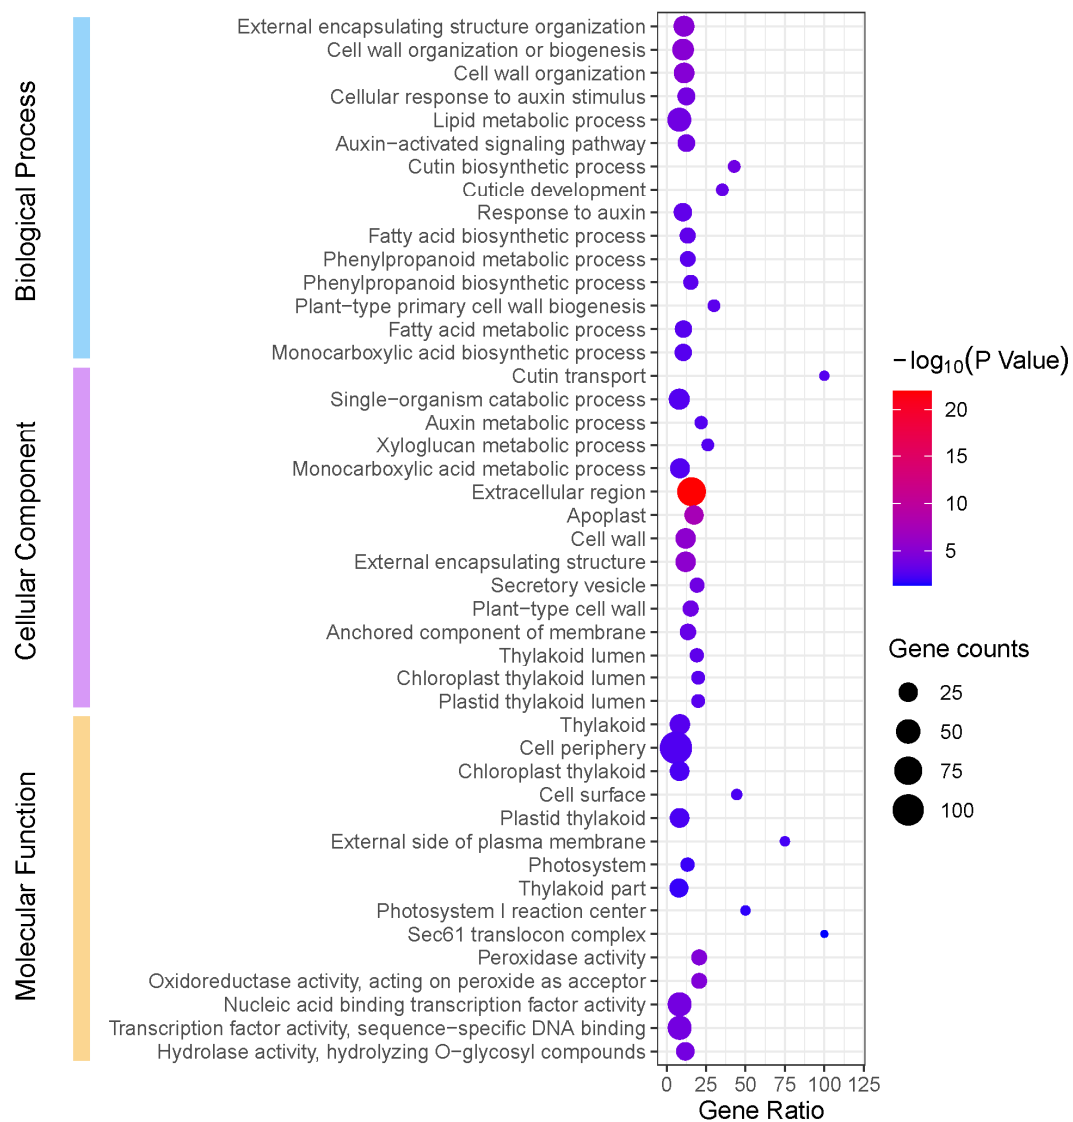

**Figure S12.** The GO terms enrichment analysis of down-regulated DEGs in dodecaploids at May. 05<sup>th</sup>.

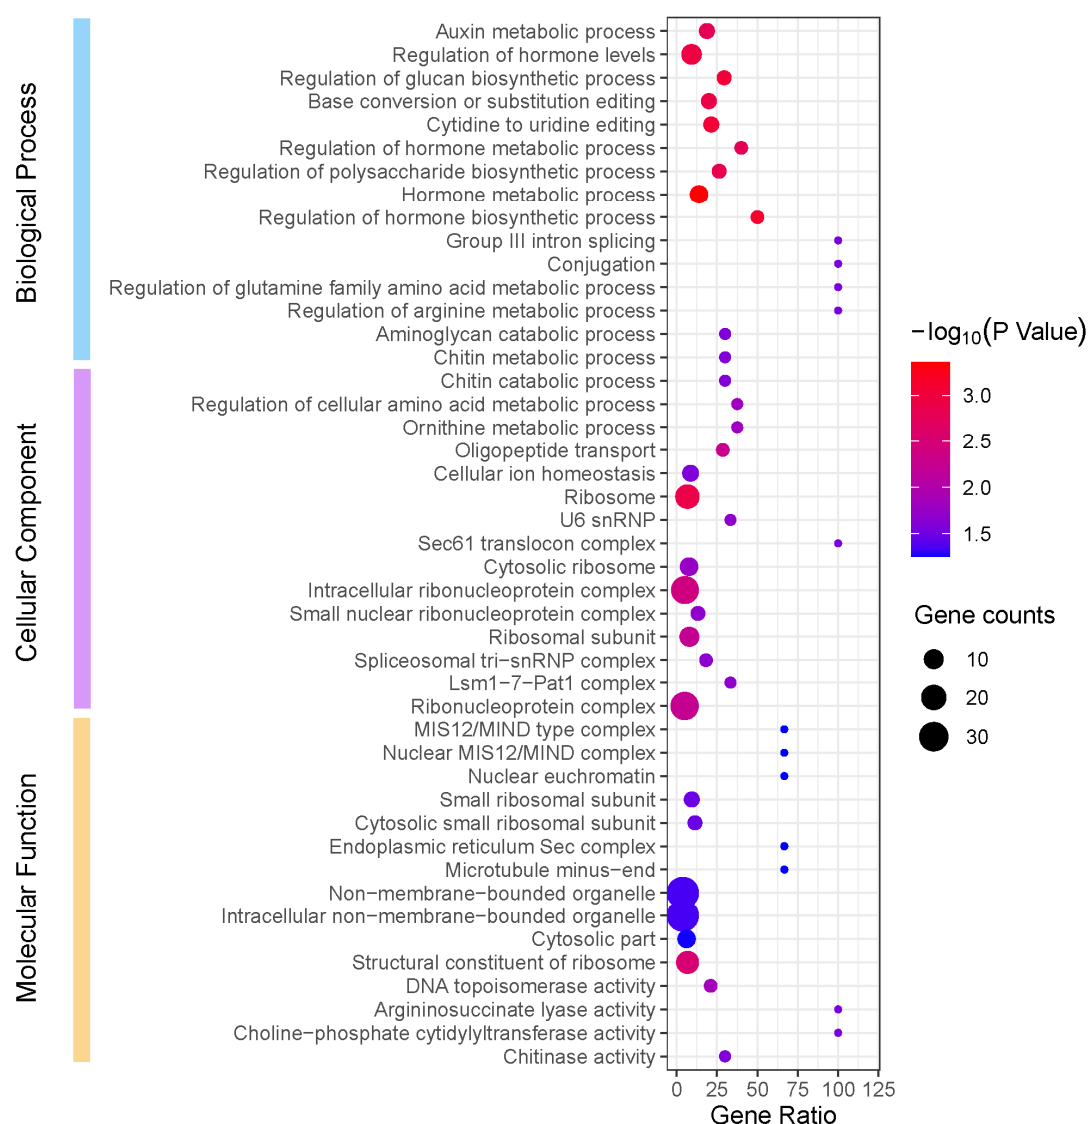

**Figure S13.** The GO terms enrichment analysis of down-regulated DEGs in dodecaploids at May. 20<sup>th</sup>.

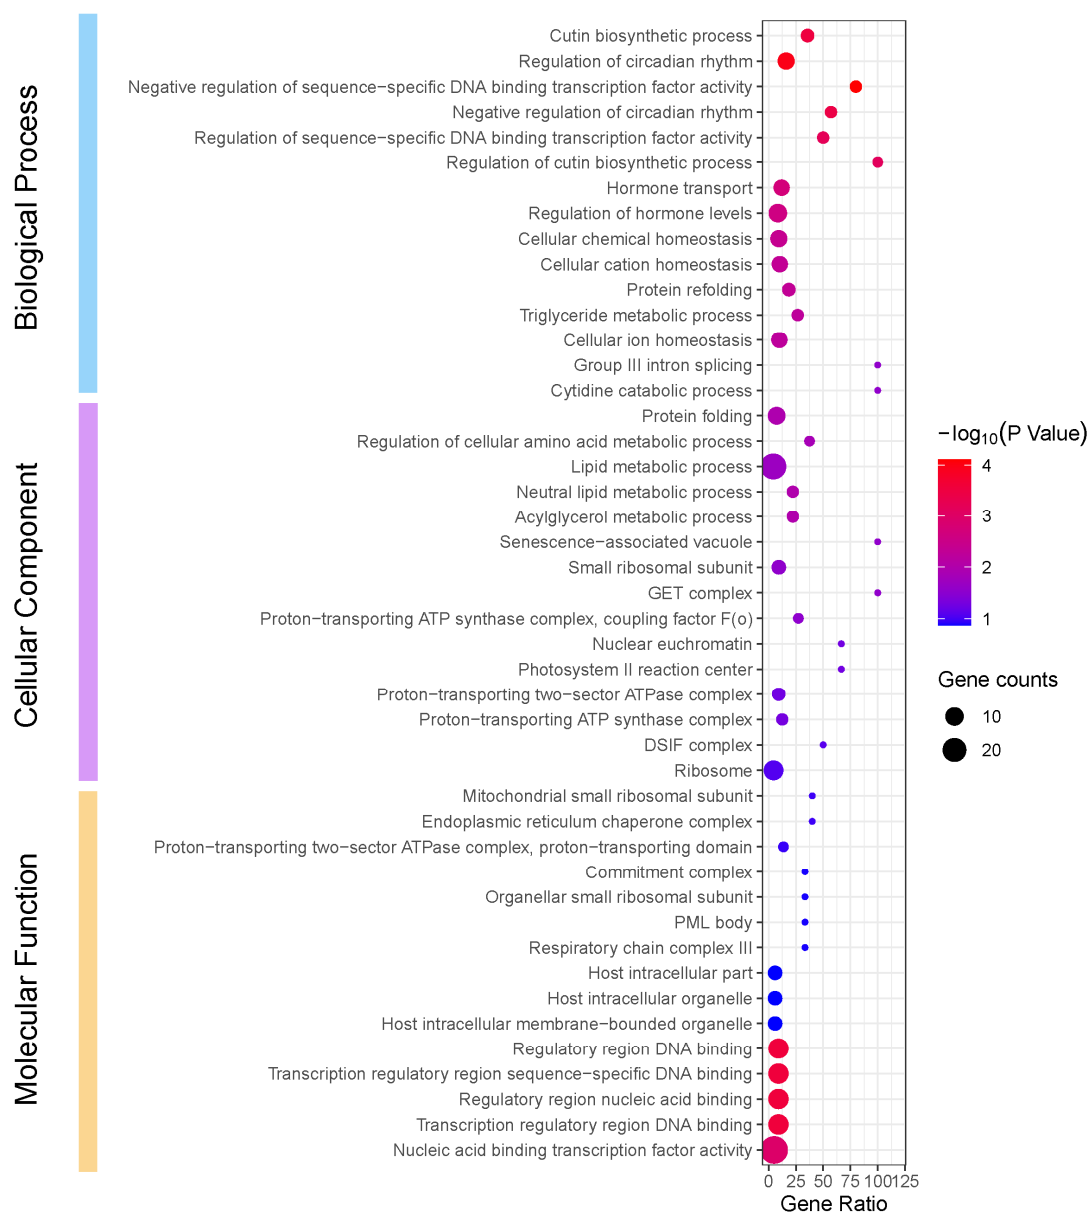

**Figure S14.** The GO terms enrichment analysis of down-regulated DEGs in dodecaploids at Jun. 05<sup>th</sup>.

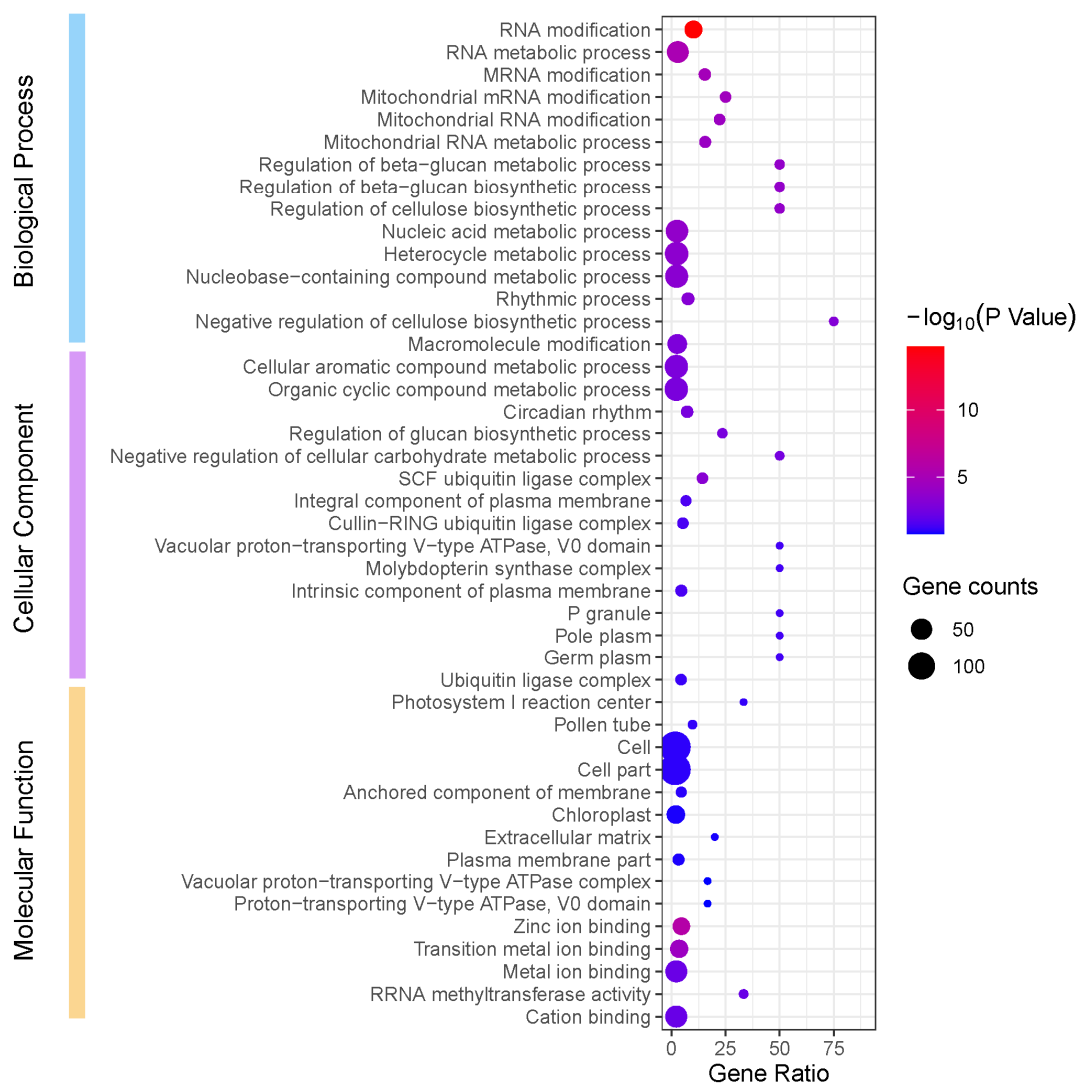

**Figure S15.** The GO terms enrichment analysis of down-regulated DEGs in dodecaploids at Jun. 23rd.

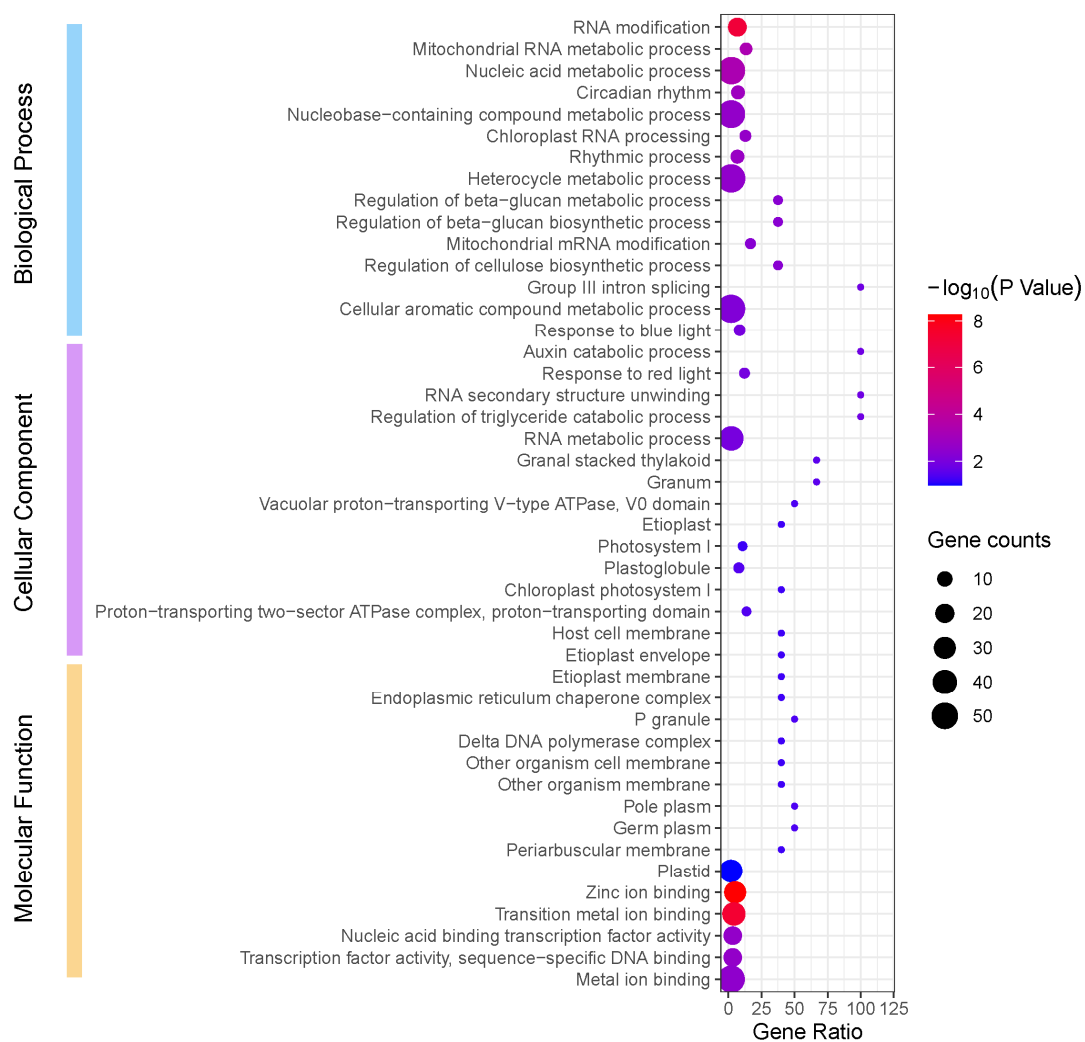

**Figure S16.** The GO terms enrichment analysis of down-regulated DEGs in dodecaploids at Jul. 20<sup>th</sup>.



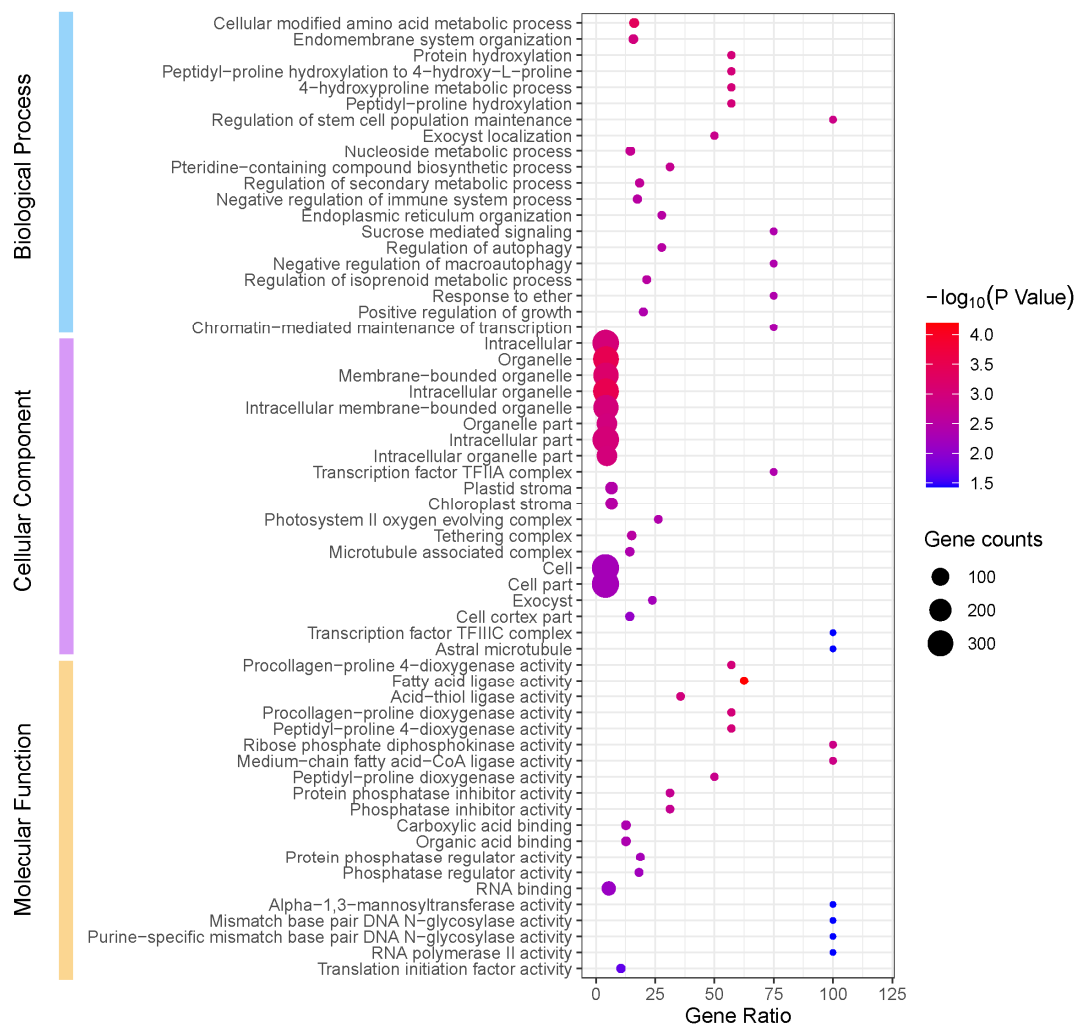

**Figure S17.** The GO terms enrichment analysis of DSGs in Apr. 21<sup>st</sup>.

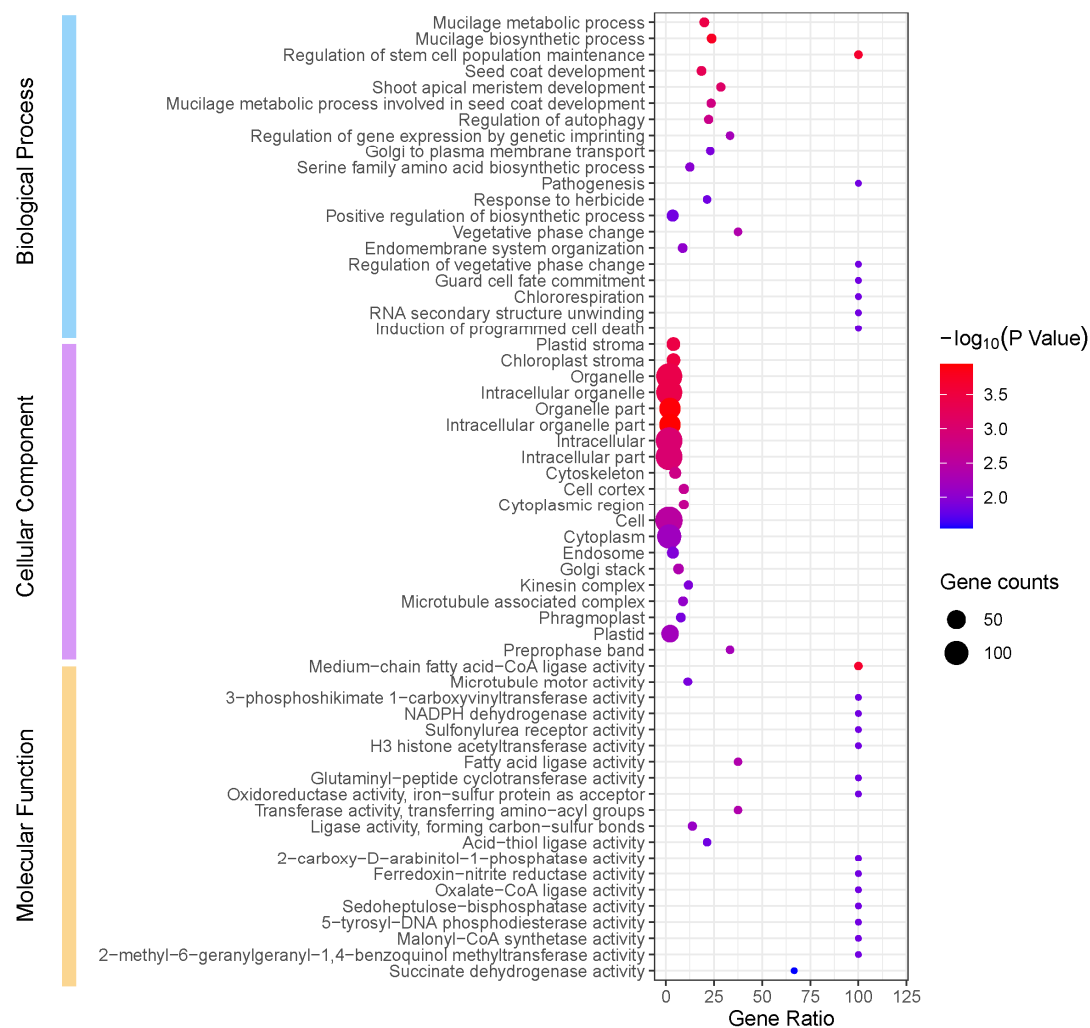

**Figure S18.** The GO terms enrichment analysis of DSGs in May. 05<sup>th</sup>.

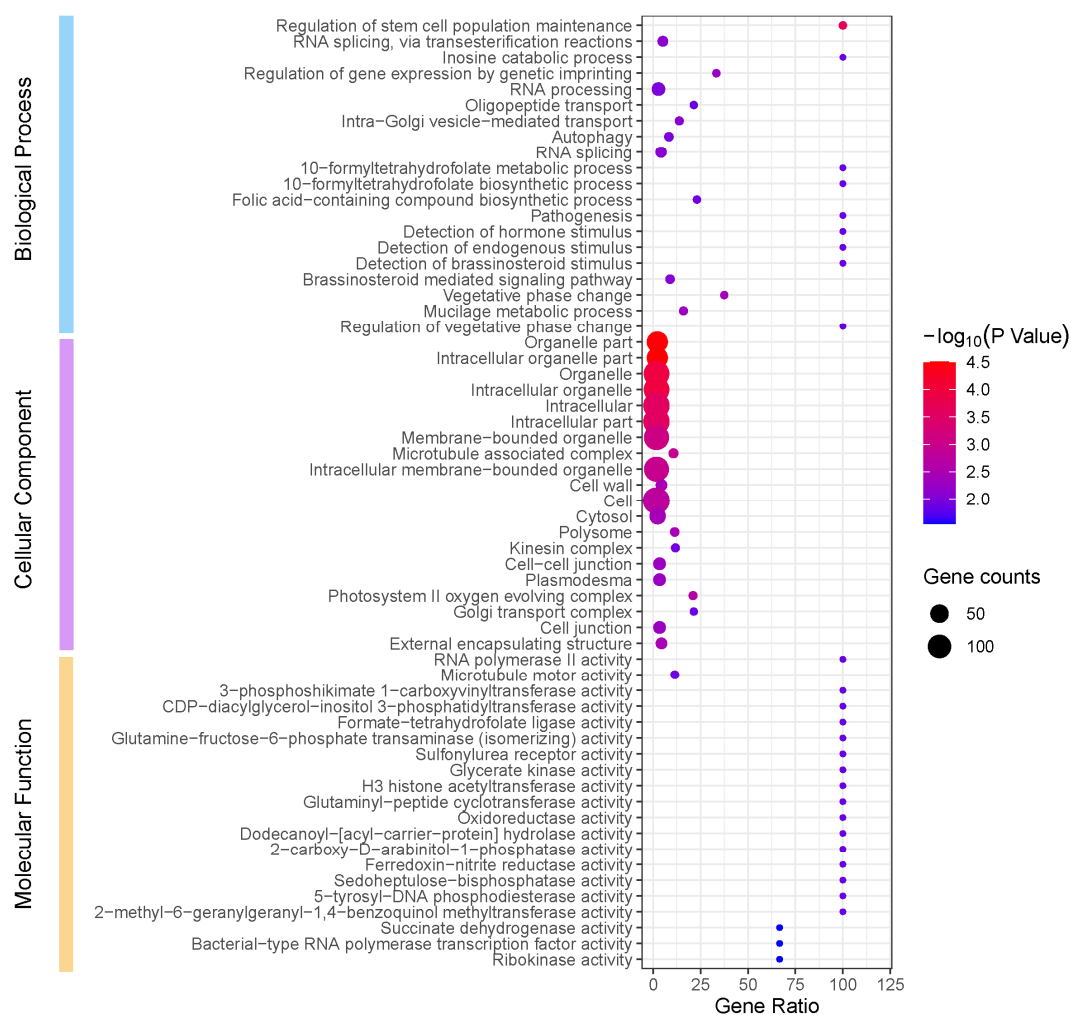

**Figure S19.** The GO terms enrichment analysis of DSGs in May, 20<sup>th</sup>.

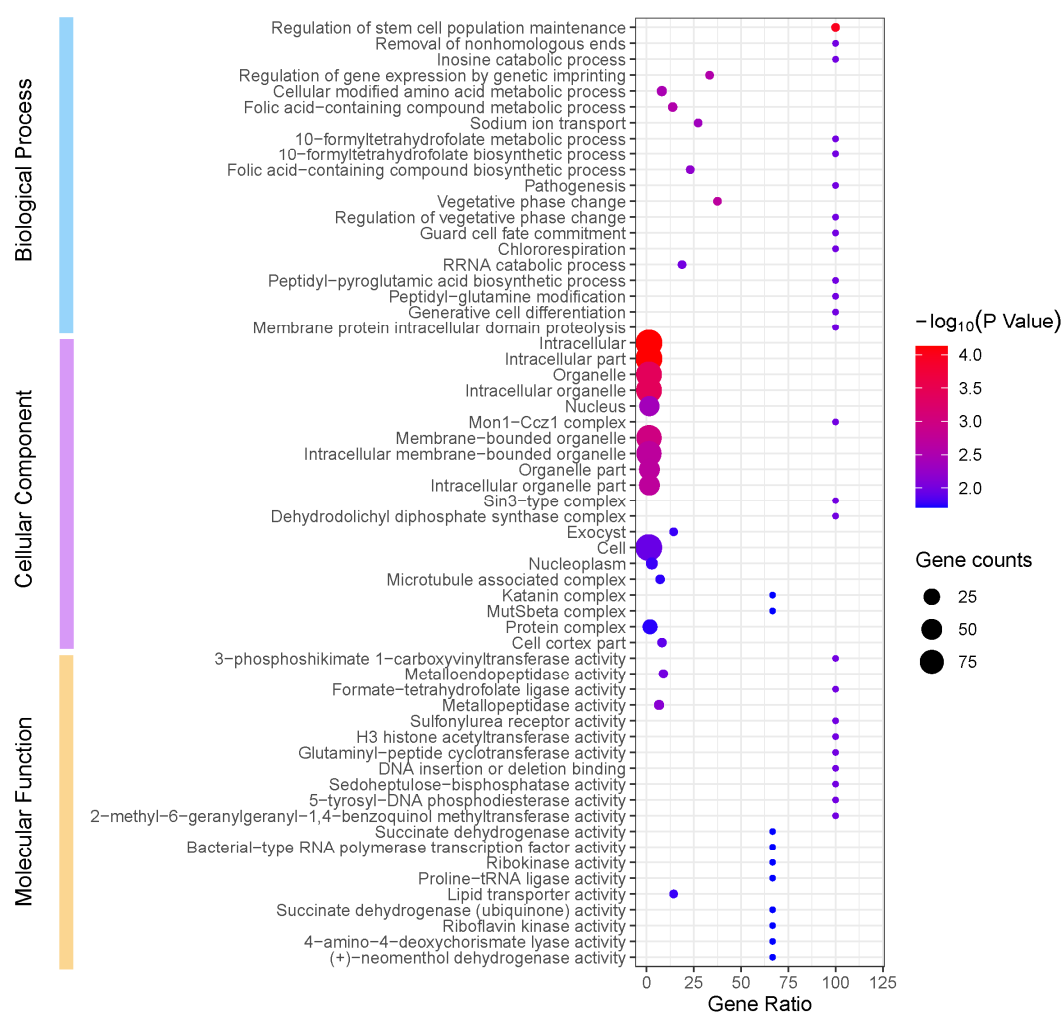

**Figure S20.** The GO terms enrichment analysis of DSGs in Jun. 05<sup>th</sup>.

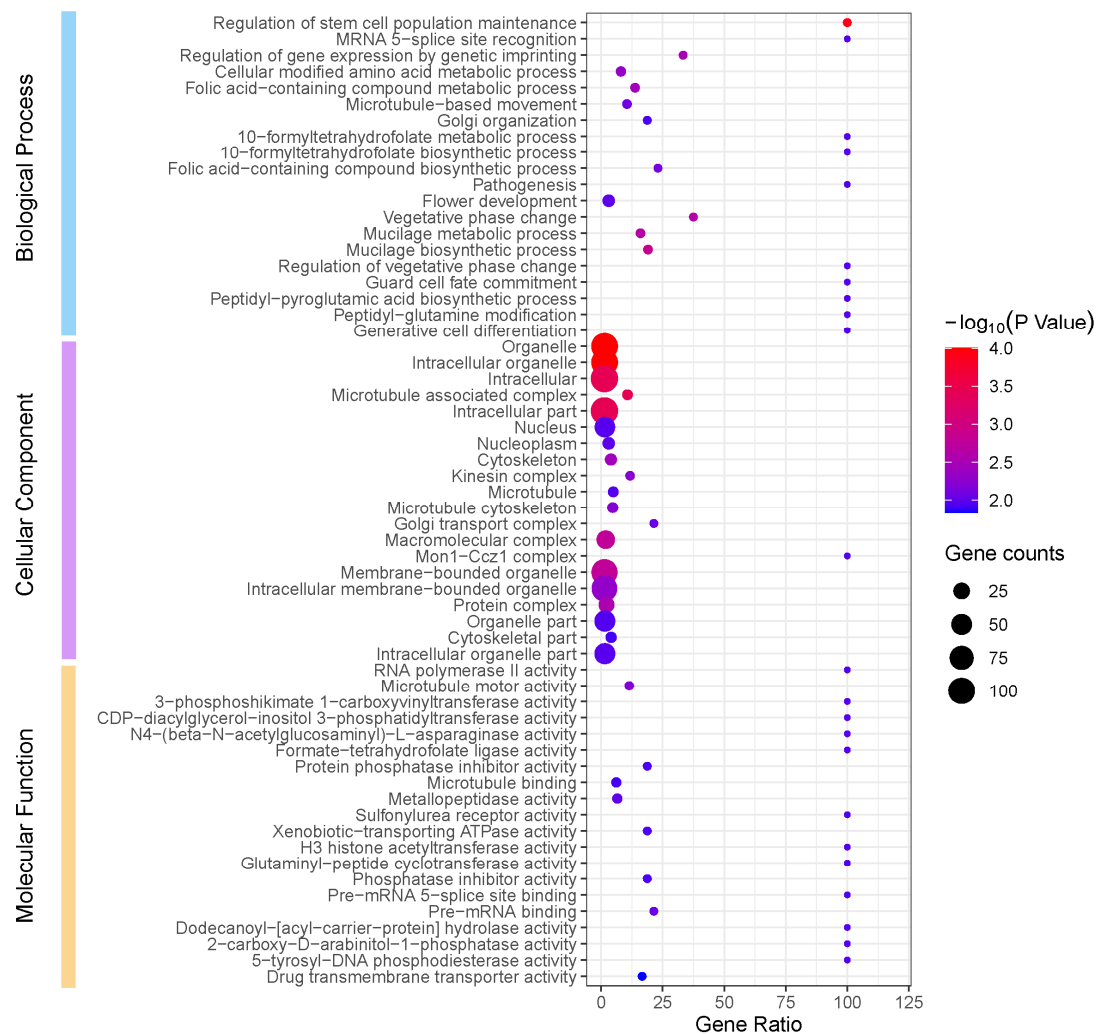

**Figure S21.** The GO terms enrichment analysis of DSGs in Jun. 23rd.

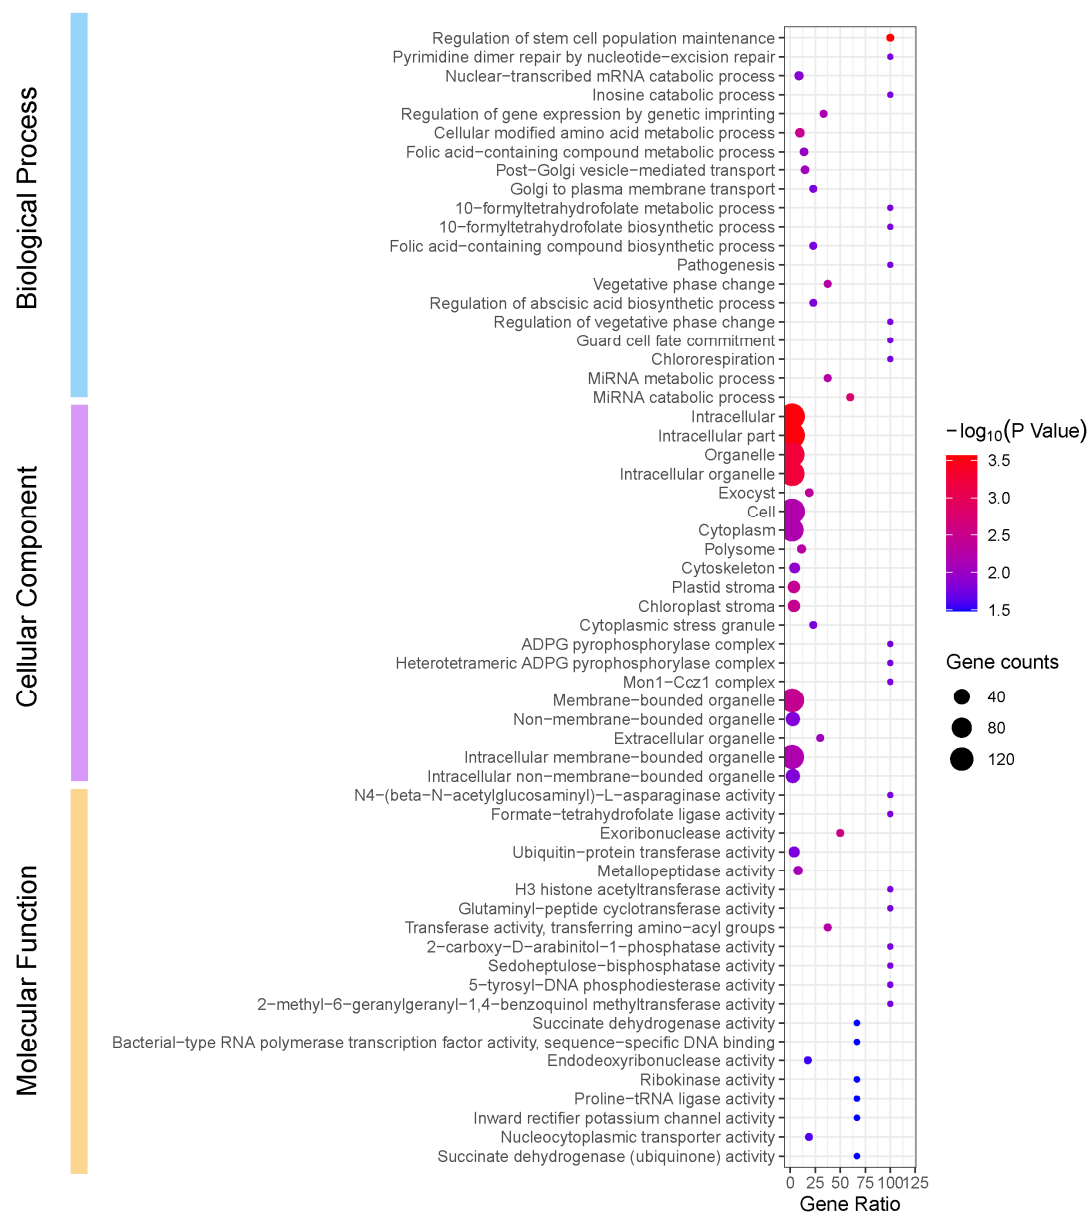

**Figure S22.** The GO terms enrichment analysis of DSGs in Jul. 20<sup>th</sup>.

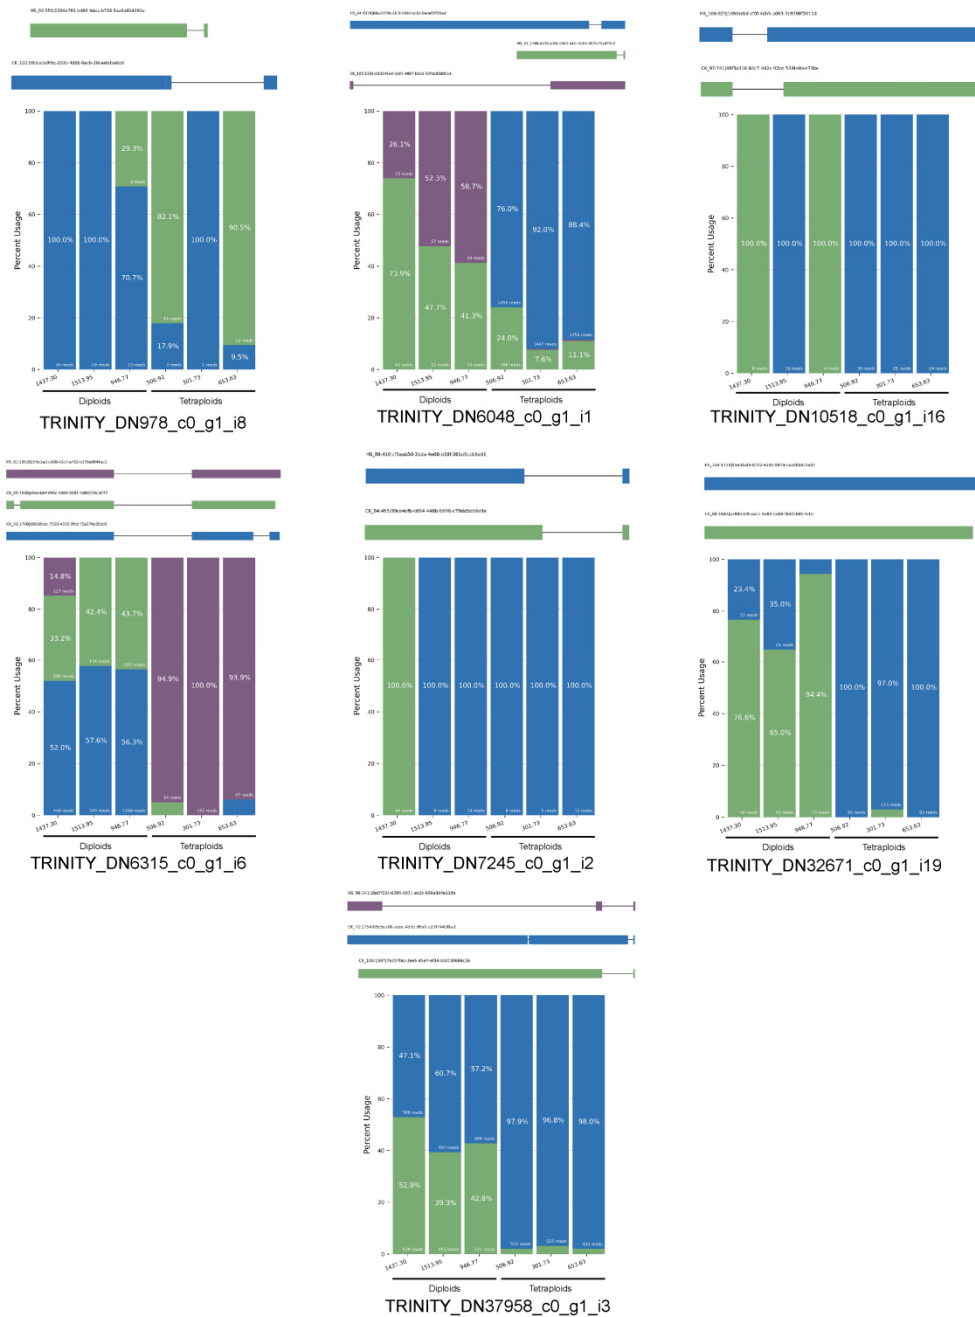

**Figure S23.** Schematic structure (top) and expression of isoforms based on RNA-seq (bottom) of the DSGs related to flowering and flower development.
