# Supplementary material for: The Abundant and Unique Transcripts and Alternative Splicing of the Artificially Autododecaploid London Plane (Platanus × acerifolia)
Source: Int J Mol Sci. 2023 Sep 23;24(19):14486. doi: 10.3390/ijms241914486 (PMC10572260; doi:10.3390/ijms241914486)
Supplement: Supplementary file 1 [file ijms-24-14486-s001.zip › Supplementary Tables.xlsx]

## Sheet: Supplementary Table S1
Supplementary Table S1. Statistical results of NGS RNA seq data of Platanus.
Sample	Raw Reads(M)	Raw Bases (Gb)	Clean Reads(M)	Clean Bases (Gb)	Q20 Rate(%)	Q30 Rate(%)	GC Content(%)
CK-1-1	44.3481	6.65221	43.1065	6.46236	97.05	89.4	46.84
CK-1-2	41.905	6.28575	40.613	6.08802	96.86	88.81	45.98
CK-1-3	40.1667	6.02501	38.8953	5.83085	96.77	88.5	45.74
CK-2-1	40.5962	6.08943	39.6414	5.94163	97.34	90.15	46.26
CK-2-2	41.1071	6.16606	39.8816	5.97932	96.99	89.13	45.89
CK-2-3	37.953	5.69296	37.1101	5.56316	97.6	90.81	44.68
CK-3-1	40.2824	6.04236	39.0633	5.85522	96.81	88.65	46.53
CK-3-2	41.1697	6.17546	39.9948	5.9943	96.9501	89.0563	46.46
CK-3-3	41.3375	6.20063	40.207	6.02677	97.02	89.24	46.68
CK-4-1	45.506	6.82589	43.9797	6.59291	96.6	87.98	46.03
CK-4-2	47.965	7.19475	46.5321	6.97603	96.79	88.55	45.93
CK-4-3	53.1518	7.97278	51.6277	7.73968	96.82	88.61	46.28
CK-5-1	48.5963	7.28944	47.3744	7.10141	97.14	89.51	46
CK-5-2	49.433	7.41495	48.1961	7.22508	97.03	89.22	46.18
CK-5-3	43.5809	6.53713	42.5858	6.38446	97.25	89.88	45.96
CK-6-1	50.8063	7.62094	49.5444	7.42642	97.12	89.51	46.55
CK-6-2	46.9363	7.04045	45.8907	6.87923	97.3	90.03	46.27
CK-6-3	53.0925	7.96387	51.9523	7.78836	97.47	90.56	46.43
HS-1-1	50.8032	7.62049	49.551	7.42727	97.08	89.3	46.26
HS-1-2	51.8885	7.78327	50.48	7.56664	97.03	89.19	46.19
HS-1-3	41.6365	6.24547	40.517	6.07308	97.11	89.46	46.77
HS-2-1	39.9725	5.99587	38.9514	5.83823	97	89.16	46.34
HS-2-2	40.4945	6.07418	39.4134	5.90702	96.87	88.82	46.42
HS-2-3	39.7671	5.96507	38.6676	5.79567	97.05	89.37	46.59
HS-3-1	56.179	8.42685	54.4436	8.16079	96.44	87.51	46.56
HS-3-2	52.489	7.87334	51.2256	7.67844	97.1	89.43	46.58
HS-3-3	44.8091	6.72137	43.2074	6.4772	96.38	87.32	46.2
HS-4-1	46.27	6.9405	45.0531	6.75411	96.95	88.98	46.11
HS-4-2	48.3193	7.24789	47.1315	7.06619	97.08	89.4	46.3
HS-4-3	50.2	7.52999	48.8697	7.32601	97.01	89.09	46.12
HS-5-1	52.085	7.81275	50.7912	7.61373	97.11	89.46	46.44
HS-5-2	53.2106	7.9816	51.8012	7.76514	96.97	89.09	46.5
HS-5-3	44.6897	6.70345	43.5557	6.52963	97.11	89.47	46.09
HS-6-1	46.8565	7.02848	45.6045	6.83669	96.88	88.81	45.9
HS-6-2	40.0191	6.00286	38.0867	5.70988	95.85	85.86	45.97
HS-6-3	42.8788	6.43183	41.3824	6.2036	96.5	87.82	46.14

## Sheet: Supplementary Table S2
Supplementary Table S2. Statistical results of assemly contigs
Data	Number of Sequences	Summary Length	Minmum Length	Average Length	Maximum Length	N50
Contigs	239977	152690540	201	636.3	15823	836

## Sheet: Supplementary Table S3
Supplementary Table S3. Statistical results of ONT raw reads
Data	Number of Sequences	Summary Length	Minmum Length	Average Length	Maximum Length	N50	Q20(%)	Q30(%)
Diploids	26474549	18,579,666,223 bp	1 bp	701.8 bp	53,022 bp	1,057 bp	53.94	18.23
Tetraploids	28339405	19,481,673,633 bp	1 bp	687.4 bp	59,026 bp	1,033 bp	53.53	17.81

## Sheet: Supplementary Table S4
Supplementary Table S4. Statistical results of redundant-free error-corrected full-length ONT reads
Data	Number of Sequences	Summary Length	Average Length	Maximum Length	N50
Diploids	9024323	6856069848 bp	759.7 bp	43,010 bp	996 bp
Tetraploids	8436331	6,644,776,693 bp	787.6 bp	18,051 bp	1,037 bp

## Sheet: Supplementary Table S5
Supplementary Table S5. The alignment between unique hexaploids ONT reads and longest assembled contigs
qName	qSize	qStart	qEnd	tName	tSize	tStart	tEnd	matches	misMatches	strand	blockCount	blockSizes	qStarts	tStarts
CK_97:2822|b9ff067d-6f5b-465a-afd6-fa33da8df965	2733	1	2733	TRINITY_DN9834_c0_g1_i2	6040	69	2799	2719	4	-	8	28,17,16,951,39,28,328,1316,	0,32,49,66,1018,1058,1087,1416,	69,97,116,135,1086,1125,1153,1483,
CK_102:799|489d467c-392a-4b1f-8d83-0bf47d460332	700	2	700	TRINITY_DN3388_c0_g1_i1	911	44	901	695	3	+	3	190,7,501,	2,192,199,	44,390,400,
CK_88:3364|b7878165-7513-4576-b17d-4e5afc96f310	3283	0	3277	TRINITY_DN18851_c0_g1_i1	3854	169	3663	3273	3	-	4	110,1092,922,1152,	6,117,1209,2131,	169,295,1529,2511,
CK_101:1093|3a3959c8-475c-497d-a7c2-9cc0601ba6e1	997	3	997	TRINITY_DN1497_c0_g1_i4	5059	230	4975	991	2	-	6	6,130,184,372,157,144,	0,6,137,321,693,850,	230,637,767,1717,2307,4831,
CK_103:350|996f3aed-ac7d-4d9b-a7f4-604ec3d28a5f	253	2	253	TRINITY_DN1062_c0_g1_i1	1285	603	954	251	0	-	2	6,245,	0,6,	603,709,
CK_96:994|198f68b6-1dfd-47f7-9a6b-6260b97dbfaa	898	2	898	TRINITY_DN2508_c0_g1_i1	1511	567	1465	894	2	-	2	103,793,	0,103,	567,672,
CK_92:431|937ddd05-aa56-475c-a1f1-9722be604c69	339	0	339	TRINITY_DN3481_c1_g2_i2	1203	20	519	337	2	-	3	7,145,187,	0,7,152,	20,153,332,
CK_101:845|b0eaaf29-d4fa-4f58-b37c-90a3f65b5bb6	748	0	748	TRINITY_DN83329_c0_g1_i1	1108	167	917	745	3	-	2	446,302,	0,446,	167,615,
CK_87:363|710395ce-9dd6-4f51-936e-06c82a2f8736	279	0	279	TRINITY_DN20065_c0_g1_i1	623	325	623	278	1	+	2	256,23,	0,256,	325,600,
CK_103:1953|649383df-382b-4694-87a1-fde4372516c8	1856	3	1856	TRINITY_DN17798_c0_g1_i2	4565	22	4465	1852	1	-	3	350,1404,99,	0,350,1754,	22,2821,4366,
CK_84:1419|94caa418-2c2f-4b6e-abd0-1efde6b66493	1338	3	1338	TRINITY_DN3015_c0_g1_i1	2221	1	2137	1326	1	-	4	8,7,719,593,	0,11,23,742,	1,9,22,1544,
CK_83:4826|d6651b34-2b6d-40bc-b883-2cacaf530735	4864	11	4864	TRINITY_DN2597_c1_g1_i6	5356	267	5124	4836	10	+	4	253,28,15,4550,	11,269,298,314,	267,524,559,574,
CK_96:355|42614de3-8605-4dde-94ad-a0ea33d1a715	262	0	262	TRINITY_DN109171_c0_g1_i1	575	122	384	261	1	-	1	262,	0,	122,
CK_97:480|64059766-c260-4213-9eda-bd5fd1f2f301	384	0	384	TRINITY_DN2564_c0_g2_i1	800	283	793	383	1	+	2	171,213,	0,171,	283,580,
CK_94:371|c63f5b7a-1e15-4b08-b68f-8ddb70935fb3	277	0	277	TRINITY_DN158953_c0_g1_i1	600	174	452	276	1	-	2	124,153,	0,124,	174,299,
CK_86:755|f78c9571-ce93-4716-880a-861e7363c933	681	0	681	TRINITY_DN6127_c1_g1_i1	983	152	832	676	3	+	3	442,202,35,	0,444,646,	152,594,797,
CK_116:2874|d22f4ad4-f854-431e-8b35-ddf0b83973a7	2800	2	2800	TRINITY_DN383_c0_g1_i10	4709	1903	4698	2792	3	-	3	2493,4,298,	0,2495,2500,	1903,4396,4400,
CK_110:817|21e4f8ac-23d3-4587-8ffc-6e9b25c9fc96	710	4	710	TRINITY_DN1116_c0_g1_i2	875	22	833	706	0	-	2	648,58,	0,648,	22,775,
CK_97:386|9038f1b7-2c17-49b2-84a3-5657210e7e9a	289	0	289	TRINITY_DN51771_c0_g1_i1	1128	772	1064	287	1	+	6	40,77,31,110,15,15,	0,41,118,149,259,274,	772,812,890,922,1033,1049,
CK_84:391|6dd689f2-97ba-4b38-932d-94b33c5af09a	309	0	309	TRINITY_DN30560_c0_g1_i1	1351	933	1243	306	3	+	2	284,25,	0,284,	933,1218,
CK_97:1017|94639f97-103f-4213-bb28-1539915993a5	921	0	921	TRINITY_DN1075_c0_g2_i1	1832	41	962	919	2	-	1	921,	0,	41,
CK_86:1185|df442d7e-d32a-4cce-9500-7f1dffce7f4c	1094	0	1088	TRINITY_DN5704_c0_g1_i7	7195	4905	5999	1088	0	+	4	221,7,80,780,	0,221,228,308,	4905,5128,5138,5219,
CK_92:1697|7d7efc57-27ce-461f-90ad-680bb76e45e4	1609	2	1608	TRINITY_DN14132_c0_g1_i2	9082	0	1613	1595	4	+	5	6,784,139,311,359,	2,8,796,938,1249,	0,7,798,938,1254,
CK_91:1275|b0b0fe7f-00e2-48a3-b615-e20cabdef0e9	1188	0	1188	TRINITY_DN6566_c0_g1_i1	1909	670	1860	1178	7	-	3	430,11,744,	0,433,444,	670,1104,1116,
CK_106:3599|eb5ad768-2529-48b1-8d15-ee340d3189ce	3534	3	3534	TRINITY_DN13302_c0_g3_i1	4034	2	3621	3525	1	+	3	9,3279,238,	3,17,3296,	2,14,3383,
CK_91:388|52c27d3f-43ba-411d-8732-a924d8733b06	293	2	293	TRINITY_DN5588_c0_g1_i1	1347	818	1146	291	0	+	2	283,8,	2,285,	818,1138,
CK_91:582|34f50853-557e-45a0-8c51-e7d8bdf7e0ee	493	0	493	TRINITY_DN35877_c0_g1_i3	3075	633	1124	489	0	+	6	229,67,35,54,7,97,	0,230,297,333,389,396,	633,862,930,965,1019,1027,
CK_108:1936|5f6f616f-aee8-4100-a9ed-b73c5e6c2c86	1843	1	1839	TRINITY_DN7151_c0_g1_i13	4733	145	4698	1829	9	-	6	943,102,234,4,470,85,	4,947,1049,1283,1287,1757,	145,2083,3792,4080,4141,4613,
CK_95:397|ee4f3b2e-5f73-451b-aaa4-3a62d50f7b47	301	0	301	TRINITY_DN287_c6_g1_i8	2694	2046	2541	298	2	-	3	30,207,63,	0,31,238,	2046,2081,2478,
CK_98:852|60326396-08c7-4a5d-bcc5-bbcd4468c9d6	760	4	760	TRINITY_DN131529_c1_g1_i1	896	0	864	753	3	-	2	6,750,	0,6,	0,114,
CK_102:523|7af85624-9594-4b87-ab5a-1c1edde4f421	426	0	426	TRINITY_DN30576_c0_g1_i1	1250	165	990	422	4	-	3	85,333,8,	0,85,418,	165,251,982,
CK_92:628|9c973ecd-4615-424a-ab52-90fc10081e04	536	0	535	TRINITY_DN52696_c0_g1_i1	1019	33	666	533	2	+	2	23,512,	0,23,	33,154,
CK_95:926|8d9c8c85-611f-4482-bada-294820c8ad8e	834	0	834	TRINITY_DN7053_c0_g1_i15	3040	2014	2931	828	5	+	2	29,804,	0,30,	2014,2127,
CK_113:2213|d7c91014-5e8b-4da2-83b0-3621b067a6da	2112	0	2107	TRINITY_DN8065_c0_g1_i1	3206	74	3162	2100	6	+	3	1195,229,682,	0,1196,1425,	74,1282,2480,
CK_96:815|b34040a7-eee5-4574-8004-82ddf88e4d27	728	0	726	TRINITY_DN550_c3_g1_i4	1317	554	1317	721	5	+	3	153,163,410,	0,153,316,	554,743,907,
CK_89:2321|a4df9a8d-ad4a-4245-b943-e6771e06a7a4	2230	0	2230	TRINITY_DN1414_c0_g1_i3	2530	0	2255	2215	15	+	2	349,1881,	0,349,	0,374,
CK_104:976|b1d601a2-3e8d-4041-befb-eb02b374a388	887	4	884	TRINITY_DN31769_c0_g1_i1	1528	647	1528	880	0	-	2	862,18,	3,865,	647,1510,
CK_92:1069|3f63588f-ea06-4633-a93d-82951313348c	976	0	976	TRINITY_DN1072_c1_g1_i8	1545	117	1471	975	1	+	4	672,287,12,5,	0,672,959,971,	117,1156,1444,1466,
CK_89:293|855757ec-0f48-4f24-8fc1-251f5f9bd333	204	0	204	TRINITY_DN18085_c0_g1_i6	3250	13	217	204	0	-	1	204,	0,	13,
CK_95:516|e4a47c04-c52e-471d-8e0e-7eed945c8049	423	0	423	TRINITY_DN15418_c0_g1_i2	594	124	594	422	1	-	2	93,330,	0,93,	124,264,
CK_89:552|ec6d90f8-8349-410f-98f8-e670b6a5f184	467	1	467	TRINITY_DN7790_c0_g1_i1	2225	1440	2213	466	0	+	3	27,434,5,	1,28,462,	1440,1621,2208,
CK_100:2109|790bdd4a-ca57-45d0-91fb-6706248d53e8	2020	2	2020	TRINITY_DN3519_c0_g1_i11	5625	81	2697	2005	11	+	6	62,225,261,1405,5,58,	2,64,291,552,1957,1962,	81,144,369,777,2338,2639,
CK_96:566|f9364b65-7a1a-4ef3-b8d4-651d40c62bb8	471	0	467	TRINITY_DN14817_c0_g1_i1	1081	19	1041	467	0	-	4	37,237,5,188,	4,41,278,283,	19,75,557,853,
CK_103:1838|b25f3e88-de58-4278-9460-83d5169d1bc4	1759	0	1754	TRINITY_DN3502_c0_g1_i10	1999	63	1880	1743	11	+	3	405,301,1048,	0,405,706,	63,486,832,
CK_89:3007|15d15ff5-ae34-4d61-9d59-5675518a107a	2929	0	2929	TRINITY_DN664_c0_g1_i6	3291	177	3172	2921	8	-	4	210,4,386,2329,	0,210,214,600,	177,399,455,843,
CK_105:1808|7f114b1c-9114-4fc5-a0c3-8d32c7737e7f	1717	4	1717	TRINITY_DN35541_c0_g1_i5	3288	66	3259	1701	5	-	8	208,480,85,30,47,40,91,725,	0,210,690,775,805,854,897,988,	66,274,1160,2072,2103,2151,2197,2534,
CK_83:317|8aad7f6e-d9f4-49f0-a672-94d1724c0850	235	0	235	TRINITY_DN6111_c0_g1_i1	4285	1341	2399	235	0	+	3	6,223,6,	0,6,229,	1341,1823,2393,
CK_106:501|2137c8ba-7945-48ac-873b-26893299b7a3	392	0	389	TRINITY_DN499_c0_g1_i1	2517	252	779	389	0	-	2	94,295,	3,97,	252,484,
CK_102:333|3ca453ab-8dc6-4d7d-9037-1baf9f95c4d3	238	1	238	TRINITY_DN59916_c0_g1_i15	1770	0	317	237	0	-	2	8,229,	0,8,	0,88,
CK_90:939|33fd3faa-8fbb-45b2-852c-cadbf4b0f48c	850	0	850	TRINITY_DN4369_c1_g1_i3	4721	358	2921	850	0	-	3	502,243,105,	0,502,745,	358,1595,2816,
CK_96:393|859ab677-77fb-43e1-a805-b563092d857a	294	0	294	TRINITY_DN39914_c0_g3_i3	3047	104	625	292	0	+	3	145,142,5,	0,147,289,	104,249,620,
CK_83:446|55dfda77-0069-4638-8d1d-fda2ebe88d6f	362	0	362	TRINITY_DN4570_c0_g1_i1	914	40	402	359	1	-	4	13,47,171,129,	0,13,62,233,	40,54,101,273,
CK_90:2834|f9f86906-7021-449f-87c3-e9597b106940	2755	0	2755	TRINITY_DN3209_c0_g1_i3	9500	6516	9272	2749	3	-	6	1163,9,1258,22,276,24,	0,1163,1173,2432,2455,2731,	6516,7680,7689,8947,8969,9248,
CK_91:695|d48bd7e9-a181-4524-a864-1237e2faacd0	606	0	606	TRINITY_DN12863_c0_g1_i12	1584	744	1552	601	3	+	4	324,10,263,7,	0,326,336,599,	744,1072,1195,1545,
CK_90:452|9f674dc0-bf32-4a08-a7ce-519421128461	360	0	360	TRINITY_DN15731_c0_g1_i1	671	15	381	359	1	-	4	15,14,47,284,	0,15,29,76,	15,32,49,97,
CK_94:1320|0ea5944d-2338-423e-a4ea-96e491655b02	1232	2	1230	TRINITY_DN115_c5_g1_i1	1574	179	1439	1226	2	-	2	938,290,	2,940,	179,1149,
CK_102:328|9c7e5d37-f076-4218-95a3-21f2cce556c6	230	0	230	TRINITY_DN24444_c0_g2_i1	878	162	394	228	2	-	2	10,220,	0,10,	162,174,
CK_105:359|d2d6a97b-86e7-46dc-a79f-b38c4c4637a2	263	0	263	TRINITY_DN4185_c0_g1_i1	6194	1168	1676	262	1	-	4	6,23,20,214,	0,6,29,49,	1168,1191,1215,1462,
CK_100:1476|79b59805-477c-41e3-bd4e-667fadfad0d9	1377	1	1375	TRINITY_DN35168_c0_g1_i2	1895	490	1865	1364	0	+	6	4,877,197,153,122,11,	1,5,882,1079,1234,1364,	490,495,1374,1572,1725,1854,
CK_108:336|7277f78f-1bfe-4525-8970-118f2c33ebcc	228	0	228	TRINITY_DN29617_c1_g2_i1	988	703	955	226	1	+	3	63,158,6,	0,64,222,	703,770,949,
CK_94:2121|25403309-656f-4d9e-abbf-567b9878786e	2022	0	2022	TRINITY_DN48594_c0_g1_i1	5457	217	2258	2003	13	+	10	14,364,188,98,408,64,10,195,26,649,	0,15,379,568,668,1076,1142,1152,1347,1373,	217,237,602,790,892,1302,1372,1384,1581,1609,
CK_107:668|c775dfe3-6b57-4c96-a863-08f89e9181df	562	0	562	TRINITY_DN20300_c4_g2_i4	2318	754	1318	557	1	-	8	85,22,41,101,108,38,10,153,	0,88,110,151,252,360,399,409,	754,839,862,904,1006,1115,1153,1165,
CK_93:851|b6a51e09-3451-4b74-b22b-4eb931eba465	757	0	757	TRINITY_DN5330_c0_g1_i8	7042	3107	4437	752	5	+	2	123,634,	0,123,	3107,3803,
CK_97:884|e58a6664-8a5b-49da-884e-f8ce47ab754f	829	0	824	TRINITY_DN16216_c0_g3_i1	989	125	955	822	0	-	4	142,246,417,17,	5,148,394,812,	125,270,519,938,
CK_113:615|fba6e7c9-0074-4204-9885-e4e7c55da575	502	0	502	TRINITY_DN19229_c1_g1_i2	1839	588	1337	497	3	-	4	6,234,18,242,	0,6,241,260,	588,838,1074,1095,
CK_108:2689|63dd1928-081c-4701-b4d4-7a690462db8f	2573	3	2562	TRINITY_DN4151_c0_g1_i1	2829	75	2633	2551	6	-	2	15,2542,	11,28,	75,91,
CK_97:1267|1b431ca5-f705-4b25-8e02-e945aafdd6c6	1169	0	1166	TRINITY_DN32332_c0_g1_i1	1987	135	1303	1163	3	-	2	233,933,	3,236,	135,370,
CK_95:987|530f0371-dcda-4e9d-b1d6-614f56efcee1	929	2	929	TRINITY_DN30818_c1_g1_i1	1088	11	998	926	1	+	2	666,261,	2,668,	11,737,
CK_91:322|0a6d8620-64d8-4aaa-88c8-d5998e2e8c2c	231	0	231	TRINITY_DN69735_c1_g2_i2	1517	899	1138	230	1	+	8	122,17,7,24,22,5,28,6,	0,122,139,146,170,192,197,225,	899,1022,1040,1048,1073,1096,1103,1132,
CK_92:4608|d4ec74d1-e16e-4f12-ae9b-a3045c492d56	4532	0	4493	TRINITY_DN2536_c1_g1_i5	6756	263	6584	4493	0	-	4	1044,2495,615,339,	39,1083,3578,4193,	263,2944,5530,6245,
CK_105:2666|0b6d897e-a4c5-4335-ac4f-55aecfa060c6	2579	1	2576	TRINITY_DN12855_c0_g1_i5	3235	101	2684	2557	8	-	8	76,2200,20,43,91,93,36,6,	3,79,2283,2303,2347,2442,2535,2572,	101,179,2379,2400,2443,2543,2637,2678,
CK_87:821|ddc7e7da-a38c-4ab0-8225-4f2130efc4cc	747	0	747	TRINITY_DN9262_c0_g2_i1	983	27	861	744	3	-	2	723,24,	0,723,	27,837,
CK_88:326|24958e91-eaff-4fd6-8204-fd429c6aaf6a	238	0	238	TRINITY_DN3481_c1_g2_i2	1203	20	511	238	0	-	3	6,42,190,	0,6,48,	20,273,321,
CK_89:344|b404ef79-2acc-4484-aaf2-01b21e458f0b	259	0	259	TRINITY_DN25088_c0_g2_i1	3221	1918	2529	258	1	-	2	7,252,	0,7,	1918,2277,
CK_100:840|c2e8ee07-0f36-41d4-949e-2b71c2b04781	739	1	739	TRINITY_DN3813_c1_g1_i9	2287	5	743	734	4	-	1	738,	0,	5,
CK_111:1968|ce43ce48-383f-439d-a5e6-cff02352f794	1868	1	1855	TRINITY_DN9752_c0_g2_i4	2025	25	1880	1853	1	-	2	476,1378,	13,489,	25,502,
CK_91:476|4bfea798-d940-4873-af8a-9e2997d26b74	385	1	384	TRINITY_DN550_c3_g1_i4	1317	835	1266	382	1	+	2	91,292,	1,92,	835,974,
CK_89:368|1a1c23e8-7ef2-49e2-9d57-554c1176cdb3	280	0	280	TRINITY_DN4690_c0_g1_i4	1044	720	1001	278	1	+	2	274,5,	0,275,	720,996,
CK_92:2991|42bbdfda-e95e-43f8-a768-8365a716df2d	2922	0	2917	TRINITY_DN3109_c0_g1_i9	6731	92	4563	2898	13	+	2	1541,1370,	0,1547,	92,3193,
CK_98:461|6472acc0-214e-4f06-bdfb-b79c9d6509a5	364	0	364	TRINITY_DN26137_c0_g1_i2	10203	7679	8055	362	1	+	2	239,124,	0,240,	7679,7931,
CK_40:1453|06278c14-8ca8-4f79-a61a-42487b0d2f5c	1438	0	1438	TRINITY_DN3141_c0_g1_i4	4708	1892	3675	1432	6	+	2	208,1230,	0,208,	1892,2445,
CK_93:380|77c44b67-3dad-4312-9065-3fe9a1c5b9d1	287	0	287	TRINITY_DN8143_c0_g3_i1	912	533	822	285	2	+	2	141,146,	0,141,	533,676,
CK_94:579|3a3c0905-9b9c-4faf-954b-cc29f88b8bf1	487	0	487	TRINITY_DN3795_c0_g1_i2	861	156	717	486	0	-	6	5,101,159,30,152,39,	0,5,106,265,296,448,	156,226,328,491,524,678,
CK_92:784|adb06414-c283-4adf-890a-907800c7d2c9	698	0	698	TRINITY_DN12466_c0_g1_i5	4985	3439	4979	697	0	+	4	219,451,10,17,	0,219,671,681,	3439,4358,4809,4962,
CK_93:803|1dbb8a89-cfcc-4ecd-aebb-2619105542e1	710	0	703	TRINITY_DN6106_c0_g1_i2	1960	214	1146	703	0	-	2	698,5,	7,705,	214,1141,
CK_92:410|7eec0a84-c1e3-43e4-bffc-1b94c1786e98	323	0	323	TRINITY_DN589_c0_g1_i8	2682	158	487	320	0	-	2	311,9,	0,314,	158,478,
CK_83:1445|c485c570-823b-47fd-8220-7a91bc8b27c2	1384	0	1381	TRINITY_DN5621_c0_g1_i3	1555	64	1444	1375	3	+	3	1207,51,120,	0,1209,1261,	64,1271,1324,
CK_106:1173|b0aca1a9-8764-4f14-9fe1-404fa79878d2	1068	0	1063	TRINITY_DN4463_c0_g2_i2	3412	11	1310	1059	4	-	2	828,235,	5,833,	11,1075,
CK_100:569|1eb0b886-fc48-47c1-b25e-c0f2e3483f7c	472	0	472	TRINITY_DN550_c3_g1_i4	1317	505	1309	470	2	+	5	13,100,12,332,15,	0,13,113,125,457,	505,524,626,938,1294,
CK_108:393|58da8283-b4b9-4b6e-9340-c8e861d99a9a	290	0	290	TRINITY_DN22232_c0_g1_i5	2290	2	293	288	2	-	2	192,98,	0,192,	2,195,
CK_106:2037|95c5fc9f-77aa-4c6b-8462-ac4acdd626cc	1963	3	1958	TRINITY_DN774_c1_g1_i7	2350	59	2272	1944	9	-	8	88,3,9,23,1269,11,324,226,	5,93,96,105,129,1399,1410,1734,	59,149,153,163,186,1458,1576,2046,
CK_88:609|5e432e6e-7a80-4995-9081-f35d259f0ae4	524	1	524	TRINITY_DN28870_c2_g1_i1	901	303	894	519	4	+	2	505,18,	1,506,	303,876,
CK_100:3721|f170fdc6-099f-415a-9906-5036c1cf8b6f	3640	8	3632	TRINITY_DN2590_c0_g2_i5	4550	263	4272	3614	10	+	2	3239,385,	8,3247,	263,3887,
CK_100:784|43434d33-7422-49bf-b0c9-138ef6885522	693	0	693	TRINITY_DN2367_c0_g1_i19	2960	69	2640	687	5	+	3	195,100,397,	0,195,296,	69,578,2243,
CK_96:2412|d7f1f3f0-393b-4d0d-a22c-c4b6ac723d60	2310	2	2310	TRINITY_DN2655_c0_g1_i4	2677	223	2537	2301	6	+	4	61,7,5,2234,	2,63,71,76,	223,285,292,303,
CK_108:1185|d8dc8845-9c43-460e-ab14-ad8e63df8ae9	1081	0	1076	TRINITY_DN30945_c0_g1_i1	2064	19	1101	1071	4	-	6	22,78,63,412,193,307,	5,27,105,169,581,774,	19,43,123,186,600,794,
CK_106:336|21233f6a-96c4-4cd5-b211-4212df882261	229	0	229	TRINITY_DN9069_c0_g1_i3	1332	1005	1237	227	2	+	4	73,10,24,122,	0,73,83,107,	1005,1079,1090,1115,
CK_97:1641|f2807847-eedc-48ca-98cc-619be53a7d94	1545	12	1545	TRINITY_DN3422_c1_g1_i2	3817	2049	3813	1532	1	-	2	931,602,	0,931,	2049,3211,
CK_93:1465|32408d92-d40f-4e4c-9f3d-83a174bbd6bb	1379	0	1375	TRINITY_DN3071_c0_g1_i5	1715	130	1619	1368	1	-	3	44,681,644,	4,54,735,	130,181,975,
CK_88:315|a54be0d5-c32d-4fca-8b14-692cb032e5b4	227	0	227	TRINITY_DN42573_c0_g2_i1	1773	1091	1338	226	1	+	2	187,40,	0,187,	1091,1298,
CK_104:554|d78f7208-2a1b-4b67-95b2-b47d3306e1be	458	0	457	TRINITY_DN4152_c0_g2_i1	4247	2851	4086	455	2	-	3	234,6,217,	1,235,241,	2851,3133,3869,
CK_105:829|6d922e35-0f52-4577-a6f7-8a23aa341e3b	734	2	733	TRINITY_DN5459_c0_g1_i1	4403	1933	4245	731	0	+	2	490,241,	2,492,	1933,4004,
CK_101:1244|f5c46842-eb43-4b07-b04a-a029f0f969bc	1155	0	1152	TRINITY_DN4385_c1_g1_i4	1513	215	1374	1150	1	+	4	266,121,52,712,	0,266,388,440,	215,483,609,662,
CK_90:293|780e4fde-ede7-4190-b49d-2aa2812ba1eb	212	0	212	TRINITY_DN10258_c2_g1_i2	1355	14	254	211	1	-	2	7,205,	0,7,	14,49,
CK_105:379|e06343a8-2811-4485-a71a-5acd175bd9f0	275	0	275	TRINITY_DN8256_c0_g1_i3	2401	28	303	274	1	-	1	275,	0,	28,
CK_104:2059|17d1337c-ba4d-448c-b94f-8512b0e94c08	1961	3	1961	TRINITY_DN2981_c0_g1_i12	2141	39	2134	1951	7	+	2	1443,515,	3,1446,	39,1619,
CK_97:847|9c5b4a8c-86ba-4954-b197-c4c5d404164c	748	6	747	TRINITY_DN14248_c1_g1_i1	1818	135	906	741	0	+	2	151,590,	6,157,	135,316,
CK_98:649|2d2d45a1-1262-4422-8875-563b7629db93	547	0	542	TRINITY_DN3358_c0_g1_i1	1662	227	1147	542	0	-	3	275,3,264,	5,280,283,	227,550,883,
CK_104:690|95adc7ef-9e41-4b44-a009-673bade20b62	586	0	586	TRINITY_DN1243_c4_g1_i1	1040	276	866	582	4	+	5	127,6,3,415,35,	0,127,133,136,551,	276,404,411,415,831,
CK_90:2272|f7534f22-be14-4bba-b0a1-223844d85b6a	2177	0	2172	TRINITY_DN30059_c0_g1_i7	2757	372	2621	2161	10	-	3	187,1522,462,	5,193,1715,	372,559,2159,
CK_113:1514|fc63f2a4-a14f-4324-b48c-229c75805ee6	1421	6	1421	TRINITY_DN1321_c0_g2_i1	1569	40	1565	1412	3	-	2	395,1020,	0,395,	40,545,
CK_93:356|8c2f079c-c7cf-4ce4-916a-3454bf6ec16a	262	0	262	TRINITY_DN2438_c0_g1_i1	3239	1752	2044	262	0	+	2	257,5,	0,257,	1752,2039,
CK_94:730|dee784b4-8f9c-42c1-be27-a1e7c9ad309d	652	2	650	TRINITY_DN2527_c0_g1_i10	4433	431	3833	646	2	+	2	587,61,	2,589,	431,3772,
CK_88:1658|3ea78f80-f675-4dfa-9d35-29c45b5706c4	1581	0	1576	TRINITY_DN2299_c2_g2_i1	1749	42	1612	1569	1	-	2	1514,56,	5,1525,	42,1556,
CK_92:446|c769c7e0-acbb-48b1-a109-4e73619aee5c	355	1	355	TRINITY_DN16167_c0_g1_i3	1841	120	1302	353	1	+	3	71,5,278,	1,72,77,	120,287,1024,
CK_94:573|317b2c3a-8ac8-443c-93bd-86eaef4b83b4	483	3	483	TRINITY_DN3017_c1_g1_i2	4467	3712	4422	480	0	-	2	134,346,	0,134,	3712,4076,
CK_104:1352|dfb1e3c4-5a2b-45e5-877c-7734d0fa1660	1257	3	1251	TRINITY_DN3890_c1_g1_i1	1674	132	1503	1246	2	+	3	13,947,288,	3,16,963,	132,146,1215,
CK_103:7231|41531ae1-c198-4fd1-9092-7649adef9b55	7152	28	7138	TRINITY_DN213_c0_g1_i2	7189	79	7189	7093	17	-	1	7110,	14,	79,
CK_103:1812|e5e6e645-47da-40d6-9c38-a89bf19f712d	1730	9	1730	TRINITY_DN11_c1_g2_i1	1890	53	1861	1718	3	-	2	1305,416,	0,1305,	53,1445,
CK_82:470|3dc814be-9511-4666-86a7-c9d8dc051050	390	2	390	TRINITY_DN52893_c0_g1_i10	1232	2	423	388	0	-	2	7,381,	0,7,	2,42,
CK_89:782|cac716f0-32a6-4403-876c-de6a3a9967e8	718	0	717	TRINITY_DN539_c0_g2_i2	1017	0	732	712	5	-	2	23,694,	1,24,	0,38,
CK_96:769|61e25f0d-ff5b-42a8-a050-433282c2b835	678	0	678	TRINITY_DN1613_c0_g1_i5	2658	1883	2563	677	1	+	2	660,18,	0,660,	1883,2545,
CK_68:1038|8fd51616-47a0-430d-b2be-560e35d8971c	975	3	973	TRINITY_DN54_c1_g1_i9	1227	17	1107	967	3	+	3	159,296,515,	3,162,458,	17,179,592,
CK_90:800|eefed7b4-d305-4447-8728-f672945812cd	720	1	716	TRINITY_DN2607_c0_g1_i25	2638	109	1267	713	0	+	4	259,5,410,39,	1,262,267,677,	109,369,816,1228,
CK_103:1522|491e0f15-28cb-4f6a-b480-34167e9f76e5	1417	0	1412	TRINITY_DN12919_c0_g1_i7	4004	821	3859	1411	1	+	3	592,742,78,	0,592,1334,	821,1619,3781,
CK_100:1097|8632c4b0-9670-4c66-8d65-c19528a6f069	1011	0	1011	TRINITY_DN5631_c1_g1_i1	1988	79	1852	1011	0	+	2	83,928,	0,83,	79,924,
CK_95:933|be507a71-e410-403b-8298-1ef4e3fcbc0b	842	0	842	TRINITY_DN2890_c0_g2_i4	1943	90	932	842	0	+	1	842,	0,	90,
CK_84:958|3a8f436d-bbb3-494b-94b9-29a106eeb4ce	875	0	875	TRINITY_DN10507_c0_g1_i2	1872	332	1219	867	8	+	3	790,78,7,	0,790,868,	332,1125,1212,
CK_88:387|f9f969a6-3bc6-440b-ae78-dda8f5554335	299	0	299	TRINITY_DN39914_c0_g3_i3	3047	104	408	297	1	+	7	46,117,32,12,18,21,52,	0,46,163,195,208,226,247,	104,151,269,302,314,333,356,
CK_90:1015|3f9172e3-c518-451c-8202-cec40223cdcd	920	0	920	TRINITY_DN82901_c0_g1_i2	1658	44	1426	917	1	-	3	271,141,506,	0,273,414,	44,776,920,
CK_98:566|ca3a9e59-55a4-435b-94e8-3f452d0eb616	468	0	468	TRINITY_DN7680_c1_g1_i1	898	203	671	465	2	-	3	158,150,159,	0,159,309,	203,361,512,
CK_91:524|4ae43943-64f6-4cfc-95b4-7b5a051bd17a	434	0	431	TRINITY_DN19904_c0_g1_i3	1447	175	1256	430	1	+	3	29,74,328,	0,29,103,	175,225,928,
CK_89:2375|785b73fb-3068-40d7-b303-9a147748ce40	2307	1	2301	TRINITY_DN854_c0_g1_i4	2626	314	2612	2286	12	+	2	2266,32,	1,2269,	314,2580,
CK_60:874|2c00b705-ce55-4087-bc08-1061695aea37	818	6	818	TRINITY_DN1963_c0_g1_i4	2598	22	837	811	1	+	2	40,772,	6,46,	22,65,
CK_107:429|d5bf95ff-a531-4d7d-a414-8c7fcdb9e115	330	1	330	TRINITY_DN330_c1_g1_i1	953	408	742	327	2	-	3	101,7,221,	0,101,108,	408,510,521,
CK_104:319|6d84416c-7329-4b03-9c05-c06fb621518c	213	1	213	TRINITY_DN786_c0_g1_i6	2777	60	593	212	0	-	2	6,206,	0,6,	60,387,
CK_106:1326|5a964673-d86a-4ceb-a3d6-3c6d1115b36a	1224	2	1223	TRINITY_DN4738_c0_g3_i2	1395	98	1319	1214	5	-	4	5,1190,13,11,	1,8,1198,1211,	98,103,1294,1308,
CK_101:1238|d9180277-885b-415b-b3ce-247556a956c4	1141	3	1139	TRINITY_DN13827_c0_g2_i1	2305	698	2252	1133	3	+	2	1015,121,	3,1018,	698,2131,
CK_88:322|443cfd8d-664e-466f-bbbf-debd7fe747bf	235	1	235	TRINITY_DN10736_c2_g1_i1	736	293	546	234	0	-	2	5,229,	0,5,	293,317,
CK_102:1321|598f0726-08ef-4416-9810-7d148e28b2bc	1221	2	1221	TRINITY_DN13772_c0_g1_i2	1408	8	1272	1213	4	-	4	86,82,525,524,	0,88,170,695,	8,98,181,748,
CK_92:406|c3160cb5-e2c6-44bc-b2a0-1c93f8bd261d	314	0	313	TRINITY_DN2762_c0_g3_i2	2965	2435	2876	311	2	+	3	298,3,12,	0,298,301,	2435,2744,2864,
CK_105:1160|555f62e9-0943-4c1a-812e-28ddd8845c6c	1062	3	1061	TRINITY_DN2380_c1_g1_i2	1816	288	1695	1056	2	-	3	542,454,62,	1,543,997,	288,1177,1633,
CK_99:1208|5ed30a19-9a3d-4a20-bb62-099245618530	1138	3	1138	TRINITY_DN5323_c1_g1_i8	3382	258	2669	1132	3	+	2	65,1070,	3,68,	258,1599,
CK_90:640|936819a2-607f-4cc7-ac04-2e2c24f101f7	559	0	559	TRINITY_DN3388_c0_g1_i1	911	43	901	559	0	+	3	145,170,244,	0,145,315,	43,218,657,
CK_89:406|c9cf594b-da1e-49d3-bdde-82cb7fd133ce	322	0	322	TRINITY_DN2160_c0_g1_i2	3381	183	504	319	2	-	2	36,285,	0,37,	183,219,
CK_82:648|bd49ec4c-e601-4fc0-b669-35c329e087d5	574	0	572	TRINITY_DN11831_c0_g1_i5	4053	0	1860	569	3	-	3	22,109,441,	2,24,133,	0,44,1419,
CK_48:785|bec1f167-7961-403c-9cbd-eceff9fe0fec	746	0	745	TRINITY_DN6281_c0_g1_i5	1168	126	1050	745	0	+	3	104,130,511,	0,104,234,	126,305,539,
CK_90:1895|2288b6b3-86fe-43ed-9ae3-2da6ae67b640	1821	0	1821	TRINITY_DN872_c1_g1_i1	2133	162	2122	1806	7	+	12	416,57,3,1100,30,5,15,72,36,18,34,27,	0,417,474,477,1580,1610,1617,1632,1704,1741,1760,1794,	162,580,638,758,1858,1889,1894,1910,1983,2019,2037,2095,
CK_101:1242|540a1d55-2fa6-40ae-8859-22a7076106db	1140	0	1140	TRINITY_DN29979_c1_g2_i1	2265	61	1202	1131	8	+	2	1004,135,	0,1005,	61,1067,
CK_104:671|0271a774-323f-4671-ad67-9f01c90dd578	567	1	567	TRINITY_DN10893_c0_g1_i3	3053	992	1557	562	3	+	2	280,285,	1,282,	992,1272,
CK_94:5704|8f8bd57b-7896-41b3-9a46-46f1863d492c	5700	8	5690	TRINITY_DN10131_c0_g1_i2	6644	183	6643	5661	11	-	14	996,1429,1242,3,34,621,5,28,12,73,52,9,10,1158,	10,1006,2436,3678,3681,3716,4338,4343,4371,4384,4457,4510,4524,4534,	183,1955,3384,4627,4633,4667,5288,5294,5323,5335,5409,5461,5474,5485,
CK_92:411|cff0f0a0-88d6-4bd5-b8a5-a8969b1153d5	313	0	313	TRINITY_DN35378_c0_g3_i2	914	65	387	310	2	-	4	210,58,30,14,	0,211,269,299,	65,275,342,373,
CK_101:465|1aea4e64-a87a-42e2-92b8-31f34d2e9eff	364	0	364	TRINITY_DN62803_c0_g1_i1	2081	22	390	361	1	-	4	27,8,18,309,	0,27,37,55,	22,50,61,81,
CK_94:679|291e7eee-ff0d-427b-ad06-2d4f09dcfb0e	603	0	599	TRINITY_DN2598_c0_g1_i3	1129	131	1074	597	2	+	2	26,573,	0,26,	131,501,
CK_99:336|3148d413-1306-4298-a9c8-813a39ae3f9b	237	0	237	TRINITY_DN69735_c1_g2_i2	1517	899	1137	235	1	+	4	121,46,35,34,	0,121,168,203,	899,1021,1067,1103,
CK_95:2157|ae9ff875-2bb5-46f0-9aa7-ef8405de7eb6	2061	9	2061	TRINITY_DN1378_c2_g1_i2	2860	0	2848	2048	4	+	3	1486,555,11,	9,1495,2050,	0,2278,2837,
CK_95:385|737ee19a-61da-470d-81f8-e87ed29a00f4	284	0	284	TRINITY_DN4232_c1_g2_i1	1043	613	1013	284	0	+	2	6,278,	0,6,	613,735,
CK_87:1010|cc7d43fa-2c7a-4a89-9c08-bc28d3df6162	941	0	936	TRINITY_DN2462_c0_g1_i61	4646	1295	2727	933	0	-	4	40,8,216,669,	5,45,56,272,	1295,1806,1819,2058,
CK_94:1792|c9748dbb-ec4f-4a0d-9273-793727117fea	1709	2	1709	TRINITY_DN4057_c0_g1_i6	4341	429	3404	1699	8	-	2	1361,346,	0,1361,	429,3058,
CK_86:645|c8e47ccf-690f-46d3-ab97-f16ecbf41faf	564	0	564	TRINITY_DN12500_c0_g4_i1	2341	17	581	562	2	-	1	564,	0,	17,
CK_91:2309|fcbd8012-840b-4672-85ee-06d62edb12d5	2240	0	2239	TRINITY_DN7132_c0_g1_i1	2593	250	2490	2221	18	+	2	2190,49,	0,2190,	250,2441,
CK_107:964|8d16e2da-64b3-4ca5-96eb-b98cae39560e	865	1	865	TRINITY_DN15207_c2_g1_i6	2012	888	1776	859	5	+	2	474,390,	1,475,	888,1386,
CK_92:1287|a0d3e763-07fe-4782-a0c6-e5cb2aee0e6e	1207	0	1206	TRINITY_DN4247_c0_g1_i1	3945	2566	3771	1202	3	-	2	1198,7,	1,1200,	2566,3764,
CK_102:2926|35c1060c-ee8a-4471-ac41-a1fc8df30d3f	2858	3	2858	TRINITY_DN38389_c0_g1_i1	3553	21	3549	2847	8	-	4	5,228,2599,23,	0,5,233,2832,	21,29,926,3526,
CK_102:404|faedd736-7dfd-4024-9f82-0ae5a60d0396	300	1	300	TRINITY_DN10260_c0_g1_i2	1492	290	1442	297	2	+	2	92,207,	1,93,	290,1235,
CK_89:910|e0bdef69-715f-4f8a-af02-5ca189d5962a	834	0	834	TRINITY_DN7714_c0_g1_i1	949	33	868	832	2	+	2	40,794,	0,40,	33,74,
CK_88:870|72b1f215-1f43-47fd-9fa6-c6210fb0a68e	788	0	788	TRINITY_DN6098_c0_g2_i4	2739	269	1113	787	1	-	4	9,37,176,566,	0,9,46,222,	269,279,317,547,
CK_89:3704|b41b33da-34f9-4bea-a857-05e9c8accb26	3635	0	3625	TRINITY_DN5378_c0_g1_i1	4201	65	3986	3617	7	+	4	1002,1837,606,179,	0,1002,2839,3446,	65,1107,3201,3807,
CK_91:514|dbeb867e-7e86-42a5-8050-846eafc8b1a8	420	0	420	TRINITY_DN5354_c0_g1_i1	4499	2	3090	420	0	-	3	6,187,227,	0,6,193,	2,74,2863,
CK_94:816|09a17e73-642d-470b-ad72-a23fd9444068	730	0	730	TRINITY_DN3571_c0_g1_i1	882	33	759	723	0	+	4	27,676,5,15,	0,27,703,715,	33,62,739,744,
CK_102:550|bbb975c3-57e4-4414-b336-924b395e7de3	453	0	453	TRINITY_DN22678_c0_g1_i1	671	48	629	449	2	+	3	153,291,7,	0,155,446,	48,201,622,
CK_90:303|bb4f6c97-0660-4e64-885b-2dd432217e5d	213	0	213	TRINITY_DN149267_c0_g1_i1	832	534	745	211	0	-	2	62,149,	0,64,	534,596,
CK_109:1096|06490f1d-50d9-4c8f-b122-694b1aa89677	1012	2	1012	TRINITY_DN6528_c1_g1_i2	1257	122	1248	1007	3	+	4	15,20,960,15,	2,17,37,997,	122,138,159,1233,
CK_98:2608|205f2927-3d56-4e2c-b4a7-3bb0169f1173	2544	3	2544	TRINITY_DN1135_c0_g1_i2	2576	15	2567	2533	7	+	3	11,2068,461,	3,14,2083,	15,27,2106,
CK_91:1601|f529eae0-41f9-4722-a2c5-4aad05c840f5	1518	1	1518	TRINITY_DN3764_c0_g2_i5	1676	54	1673	1514	3	-	3	1192,307,18,	0,1192,1499,	54,1347,1655,
CK_102:1043|7cced355-9d08-4363-9c4f-c660da144a5c	941	2	941	TRINITY_DN11641_c0_g2_i1	2861	1763	2704	936	3	-	3	212,11,716,	0,212,223,	1763,1976,1988,
CK_94:1676|4cfcb7bf-ee51-4499-a0ed-c240c4f22d8b	1590	0	1589	TRINITY_DN3151_c4_g1_i1	2227	518	2178	1579	1	-	3	82,1472,26,	1,92,1564,	518,676,2152,
CK_90:711|a435a091-b851-4d81-b31f-03a99b45dd48	621	0	621	TRINITY_DN19968_c4_g1_i1	910	48	673	615	3	-	6	62,6,354,32,79,85,	0,63,69,425,457,536,	48,110,118,472,507,588,
CK_95:1716|b14b431d-184d-4e75-b6a6-926944dde07c	1614	0	1612	TRINITY_DN42302_c0_g1_i3	2402	576	2272	1601	11	-	3	181,1278,153,	2,183,1461,	576,768,2119,
CK_96:1035|166f37be-92fc-46f1-a56e-7a62ce4b51cf	946	2	943	TRINITY_DN14263_c0_g1_i1	2625	169	2019	938	3	-	2	62,879,	3,65,	169,1140,
CK_83:3362|7e871efc-76fa-4f64-97e5-2b72792fbc7a	3314	3	3311	TRINITY_DN404_c0_g1_i1	3632	295	3602	3288	19	-	2	3299,8,	3,3303,	295,3594,
CK_105:1465|024a10d1-6121-4c46-945f-486433e0544f	1406	0	1406	TRINITY_DN6007_c0_g1_i11	2309	616	2300	1405	1	-	3	1072,199,135,	0,1072,1271,	616,1751,2165,
CK_92:1167|bf2eaf28-0b50-499e-a923-7f312c49db2a	1091	4	1088	TRINITY_DN2930_c0_g1_i1	3263	1139	2880	1083	1	-	2	916,168,	3,919,	1139,2712,
CK_99:645|dfb0b1a2-2028-4130-98b4-f57001fa6012	557	0	557	TRINITY_DN5350_c0_g1_i1	1385	45	965	554	3	+	2	462,95,	0,462,	45,870,
CK_49:2425|5d4dd940-e1d8-4b08-927f-23427d2df77d	2391	3	2386	TRINITY_DN1340_c0_g4_i1	2667	207	2590	2379	4	-	1	2383,	5,	207,
CK_98:1529|4a5315cd-e433-4904-94e7-3486af5e73a7	1440	2	1440	TRINITY_DN1282_c1_g1_i7	1909	131	1777	1436	2	-	3	32,1152,254,	0,32,1184,	131,227,1523,
CK_87:1216|45caf13b-2270-45d9-bdbf-c8745f4cc656	1127	0	1127	TRINITY_DN7448_c0_g1_i5	1200	20	1151	1116	10	+	4	735,321,9,61,	0,735,1057,1066,	20,758,1079,1090,
CK_90:1465|2f7f16b0-3623-4cdc-b3be-90a86e67bdf4	1391	1	1386	TRINITY_DN8058_c1_g1_i4	1643	92	1496	1385	0	+	3	226,998,161,	1,227,1225,	92,333,1335,
CK_100:341|0b87ec4b-8fcd-40e0-aabe-cd445178fa99	246	0	246	TRINITY_DN1111_c0_g2_i1	957	1	398	245	1	-	2	102,144,	0,102,	1,254,
CK_103:610|c65faa2a-87a3-4d93-9289-4b94acc1330e	498	1	498	TRINITY_DN70070_c0_g1_i1	2331	8	532	496	1	+	2	95,402,	1,96,	8,130,
CK_115:953|6a77be1c-0b5d-4f76-98d0-29a3c396094d	862	0	860	TRINITY_DN19274_c0_g1_i1	1031	146	1019	859	1	-	2	380,480,	2,382,	146,539,
CK_87:456|da50ac26-9060-4177-9995-c00d702b31b7	372	0	369	TRINITY_DN260_c0_g1_i6	2242	109	1394	369	0	-	2	224,145,	3,227,	109,1249,
CK_90:955|22b8e0bd-f75a-4200-8641-bc599a020037	867	0	867	TRINITY_DN29435_c0_g1_i8	2833	1154	2024	862	0	+	7	52,100,142,70,55,150,293,	0,53,153,295,365,420,574,	1154,1206,1307,1450,1523,1581,1731,
CK_92:946|4ff6b470-11d5-4d25-82fe-afcfdd1ee29e	863	0	863	TRINITY_DN79061_c0_g1_i1	2215	116	1184	855	8	+	2	858,5,	0,858,	116,1179,
CK_100:2084|7cb7e07c-b033-42e8-9bfc-541e6c57d8a4	1987	3	1984	TRINITY_DN2405_c0_g2_i1	2419	39	2313	1975	5	+	2	1463,517,	3,1467,	39,1796,
CK_87:1732|57b4b778-17e7-4070-9c23-a68fbd7117cb	1658	0	1654	TRINITY_DN1684_c0_g2_i1	1838	73	1733	1650	3	-	3	1614,32,7,	4,1619,1651,	73,1692,1726,
CK_97:474|109626c4-d82f-46eb-a104-e208a8939cec	381	1	381	TRINITY_DN3618_c1_g1_i3	1799	74	767	378	2	-	2	199,181,	0,199,	74,586,
CK_113:406|044b2491-1b4f-45c2-96f5-9b2da0c27da3	298	0	298	TRINITY_DN4643_c2_g1_i2	423	10	374	298	0	+	2	148,150,	0,148,	10,224,
CK_89:494|42b1de23-aeea-4e0a-8304-f372dbcc7fce	408	0	408	TRINITY_DN796_c0_g1_i1	2684	1065	1471	404	1	-	3	12,6,387,	0,15,21,	1065,1077,1084,
CK_94:460|8eb4f305-eee0-4e08-a5c6-40eb4b1f2772	372	0	372	TRINITY_DN4610_c0_g1_i1	1028	426	832	371	1	-	2	83,289,	0,83,	426,543,
CK_98:1606|867ac9aa-4982-45d3-bdd1-bee7c4596dcc	1552	2	1550	TRINITY_DN4992_c0_g2_i1	2891	1183	2872	1545	2	+	4	1140,115,280,12,	2,1142,1258,1538,	1183,2338,2453,2860,
CK_91:348|9ceeed77-306c-4e30-b6bf-977013fbc6bc	252	0	252	TRINITY_DN4687_c0_g1_i11	1893	773	1196	250	2	+	2	246,6,	0,246,	773,1190,
CK_97:720|1e827f8a-ed44-4c70-b9b8-c1a2389700e4	618	0	618	TRINITY_DN29927_c0_g1_i1	946	12	631	612	6	-	2	27,591,	0,27,	12,40,
CK_104:2682|cd84ecf1-199a-4df3-b075-df9d4489ca57	2593	3	2593	TRINITY_DN44842_c0_g1_i6	3102	214	3059	2582	8	+	3	323,71,2196,	3,326,397,	214,705,863,
CK_107:322|1e08b0ca-9d20-41d3-a572-42a02b59991c	223	0	223	TRINITY_DN7949_c5_g1_i1	1666	1376	1649	223	0	+	2	218,5,	0,218,	1376,1644,
CK_102:3959|2094d964-42b6-43f1-a32b-1cb5ef466d9c	3928	1	3919	TRINITY_DN3410_c0_g2_i2	4060	25	3945	3899	8	-	3	35,12,3860,	9,50,67,	25,67,85,
CK_106:2879|84129afd-6029-4b07-9671-fcb7b3d3db72	2789	0	2789	TRINITY_DN32961_c0_g1_i8	4048	1253	4043	2766	21	+	5	1597,31,106,32,1021,	0,1597,1628,1735,1768,	1253,2852,2884,2990,3022,
CK_101:485|4c1130a9-b349-4c22-939b-b5194574f72c	383	0	382	TRINITY_DN15916_c1_g1_i1	795	153	536	382	0	-	2	146,236,	1,147,	153,300,
CK_103:1349|575c835b-d4ab-4dc4-9715-24af1b9baf9b	1256	1	1256	TRINITY_DN4279_c0_g1_i4	2179	42	1347	1254	1	-	2	466,789,	0,466,	42,558,
CK_88:448|18a4406d-9235-4630-9833-e4c70df072ac	363	0	363	TRINITY_DN32361_c2_g1_i1	1110	19	387	362	1	-	3	67,15,281,	0,67,82,	19,87,106,
CK_90:2325|e6cd47a3-f2e0-434a-a746-4e7b82c0ce7a	2236	0	2230	TRINITY_DN25088_c0_g2_i1	3221	59	2555	2229	1	-	3	1512,710,8,	6,1518,2228,	59,1729,2547,
CK_98:351|a3c9518b-85c4-4e5e-ae73-51d581b0848f	254	0	254	TRINITY_DN5919_c0_g1_i3	1268	51	614	252	1	+	5	34,164,31,19,5,	0,34,199,230,249,	51,86,250,283,609,
CK_113:3004|670da832-1693-4a10-b06a-8d36437169ef	2895	15	2891	TRINITY_DN8364_c1_g1_i3	4306	0	4211	2871	5	+	2	2237,639,	15,2252,	0,3572,
CK_91:377|fc25af7b-f427-49de-a743-28d010f4dfa2	284	0	284	TRINITY_DN282_c0_g1_i2	4125	2521	2838	284	0	-	3	146,10,128,	0,146,156,	2521,2671,2710,
CK_91:442|fb436f4f-51b3-4e8e-b033-26ae41dde16a	351	0	351	TRINITY_DN44293_c2_g1_i1	672	161	514	351	0	+	3	62,48,241,	0,62,110,	161,224,273,
CK_90:1052|299e0d66-d8ef-46d5-ac80-fb9164f802da	971	0	971	TRINITY_DN72014_c0_g1_i8	1697	173	1508	966	3	-	5	7,202,570,181,9,	0,7,210,780,962,	173,235,437,1318,1499,
CK_93:700|1987c085-41ab-46d4-927c-1c989cb92433	612	0	612	TRINITY_DN10419_c0_g1_i9	3223	982	1666	606	3	+	4	464,4,136,5,	0,465,471,607,	982,1446,1454,1661,
CK_86:495|215a0b92-a70f-4da2-be9a-881d981a8c5a	418	0	418	TRINITY_DN7038_c1_g1_i2	2207	1011	1430	415	1	+	6	248,72,13,3,63,17,	0,249,321,334,337,401,	1011,1259,1332,1346,1350,1413,
CK_95:1052|6049c5a5-66db-4fa0-9c22-05b72eded09a	968	0	968	TRINITY_DN8926_c0_g1_i4	4129	1093	2454	963	2	+	5	11,13,26,908,7,	0,12,25,53,961,	1093,1104,1119,1146,2447,
CK_90:308|29d9e9a0-add3-4c0a-a81c-776f9933a25c	216	0	216	TRINITY_DN163854_c0_g1_i1	273	15	251	214	2	-	3	15,8,193,	0,15,23,	15,49,58,
CK_105:2436|688774b4-a794-487f-a932-553a891e2853	2350	3	2350	TRINITY_DN45278_c0_g1_i1	2802	48	2756	2340	6	+	4	1413,431,323,179,	3,1416,1848,2171,	48,1624,2251,2577,
CK_66:591|a92408dd-a89d-444f-9bd5-1fda2d7f2344	524	1	523	TRINITY_DN29184_c0_g1_i4	4598	204	730	519	1	-	5	6,16,32,96,370,	1,7,24,57,153,	204,215,231,263,360,
CK_105:346|dfb1fccb-cffc-478a-b238-589a8a8eab08	250	0	248	TRINITY_DN22281_c0_g1_i6	1165	643	1010	248	0	+	3	27,78,143,	0,27,105,	643,787,867,
CK_88:1988|c9b77929-589a-4665-a5a5-6eddded39053	1904	4	1902	TRINITY_DN898_c0_g1_i10	2190	175	2073	1886	12	-	1	1898,	2,	175,
CK_99:2511|d4ec64bf-23e1-4bac-90fc-4efb7b43353c	2418	3	2415	TRINITY_DN1692_c0_g1_i1	2513	65	2475	2399	11	-	2	375,2035,	3,380,	65,440,
CK_104:3102|63a7bd26-053a-42ed-9a1d-3482f4d3f829	3011	15	3002	TRINITY_DN38271_c2_g1_i1	3243	184	3175	2984	3	+	2	18,2969,	15,33,	184,206,
CK_100:1036|8e40c7d1-99f7-4955-80d0-79c19d12c0d2	944	3	943	TRINITY_DN13002_c0_g1_i2	1311	200	1302	940	0	-	2	364,576,	1,365,	200,726,
CK_104:3291|ff4a8a72-1b59-457b-a959-01e1845f2718	3187	2	3184	TRINITY_DN4152_c0_g2_i1	4247	175	3455	3170	9	-	4	7,799,2133,240,	3,11,812,2945,	175,184,1064,3215,
CK_110:756|d18d7c97-3615-4c16-b5ce-c166dde43be2	646	3	646	TRINITY_DN3388_c0_g1_i1	911	46	908	641	1	+	3	341,287,14,	3,345,632,	46,602,894,
CK_87:386|a55f27bf-b2dc-418d-b8a2-d5b54afbbcd5	298	0	298	TRINITY_DN44733_c0_g1_i1	755	134	510	296	0	-	3	6,284,6,	0,8,292,	134,144,504,
CK_111:664|e97092df-de80-4de3-a192-27159049aa86	556	0	556	TRINITY_DN32647_c0_g1_i2	1258	469	1030	551	2	+	4	115,22,216,200,	0,115,140,356,	469,585,611,830,
CK_93:1260|11bd1744-2ed4-4639-a7d8-13ce607f1143	1187	0	1187	TRINITY_DN1869_c1_g1_i2	3265	1097	2388	1185	2	+	2	544,643,	0,544,	1097,1745,
CK_97:369|389e4ec2-3b59-43b9-8aa5-ebdc13b3adc6	275	0	275	TRINITY_DN27721_c0_g1_i1	878	147	423	274	1	+	2	183,92,	0,183,	147,331,
CK_102:1505|82f3a4da-7728-4d4c-810e-14ddb4a53e2b	1430	3	1430	TRINITY_DN1952_c2_g1_i1	1505	5	1440	1422	5	-	2	50,1377,	0,50,	5,63,
CK_89:331|50702831-64ea-4370-9d67-18432d6687a0	242	0	242	TRINITY_DN41447_c0_g1_i1	1181	253	500	240	0	-	5	96,41,56,15,32,	0,96,137,195,210,	253,350,393,452,468,
CK_97:362|7bd8f680-1851-4613-9d74-27e9484d1975	269	0	269	TRINITY_DN3773_c0_g1_i8	3042	4	284	268	1	-	3	40,176,53,	0,40,216,	4,53,231,
CK_88:829|f7386f87-7945-4c06-a217-a32434182c59	754	0	752	TRINITY_DN15456_c0_g1_i12	2762	1730	2561	748	4	-	2	149,603,	2,151,	1730,1958,
CK_98:475|f8a3e4c6-befe-42e1-b4f3-a5de73f829b8	399	0	399	TRINITY_DN5732_c0_g1_i8	1242	810	1239	397	2	+	3	13,381,5,	0,13,394,	810,830,1234,
CK_94:774|cf0591ad-bf26-4a5c-aa01-14642e0a6e1c	686	0	686	TRINITY_DN7776_c0_g1_i4	15823	1562	2254	680	6	-	4	14,15,386,271,	0,14,29,415,	1562,1578,1595,1983,
CK_85:1170|b098a4f6-e97c-4553-a857-be276d41c013	1103	0	1103	TRINITY_DN13533_c0_g2_i3	2407	141	2313	1096	5	+	3	32,289,780,	0,32,323,	141,174,1533,
CK_92:863|6835b3af-8d31-4cdd-9b44-f29f75ed6e46	785	0	784	TRINITY_DN2598_c0_g1_i3	1129	130	1074	778	6	+	3	608,10,166,	0,608,618,	130,896,908,
CK_87:301|b47141c5-61d9-497a-8bdc-308f6a911ef0	214	1	214	TRINITY_DN122527_c0_g1_i1	920	146	395	213	0	-	2	61,152,	0,61,	146,243,
CK_107:1416|49b3c2f1-bce6-4b6b-9dde-a4ace40a7bfd	1321	3	1319	TRINITY_DN2075_c0_g1_i2	1978	422	1740	1313	3	-	3	981,14,321,	2,983,997,	422,1404,1419,
CK_104:1368|74449164-f49e-4ab5-ae5d-39e52b8c6eb8	1267	2	1262	TRINITY_DN7357_c0_g1_i3	1968	325	1659	1255	4	-	3	143,932,184,	5,149,1081,	325,468,1475,
CK_90:1145|494e46f8-9258-4634-a7b9-8c95119d7aa9	1057	0	1057	TRINITY_DN14580_c1_g1_i4	1290	52	1212	1051	4	+	4	31,398,9,617,	0,31,431,440,	52,101,499,595,
CK_97:1725|a4d229b6-92c3-48f8-a03e-d7e9f896228a	1635	0	1635	TRINITY_DN2432_c3_g1_i1	4844	3134	4770	1620	5	+	11	742,121,40,83,438,4,18,18,14,22,125,	0,744,866,906,991,1430,1434,1453,1473,1487,1510,	3134,3876,3997,4038,4125,4563,4569,4587,4608,4623,4645,
CK_97:804|4039b700-fd8a-4fec-b9e6-30cc66ea57af	711	0	711	TRINITY_DN2299_c1_g1_i3	1142	258	1097	708	3	-	2	500,211,	0,500,	258,886,
CK_104:1643|74e8f8fd-afc6-427a-8c50-601713106ddc	1550	0	1545	TRINITY_DN187_c0_g1_i1	2136	287	1921	1539	3	-	8	10,4,271,9,31,171,377,669,	5,15,20,291,301,333,504,881,	287,298,302,575,584,615,787,1252,
CK_98:328|809c9ce3-27f9-48a4-ba02-be8357698465	238	0	238	TRINITY_DN25088_c0_g2_i1	3221	2269	2816	238	0	-	3	151,81,6,	0,151,232,	2269,2422,2810,
CK_108:509|527f9157-7196-458f-bc51-84a556e1078f	410	0	410	TRINITY_DN5556_c0_g2_i1	1441	877	1434	410	0	+	4	370,12,9,19,	0,370,382,391,	877,1392,1405,1415,
CK_101:4118|58383416-08c0-4485-b0e2-852c6f902072	4037	0	4037	TRINITY_DN9226_c0_g2_i3	5557	1362	5407	4007	17	-	11	26,217,368,57,79,26,1499,975,437,331,9,	0,27,245,613,670,749,781,2283,3258,3697,4028,	1362,1388,1605,1975,2033,2115,2148,3647,4623,5064,5398,
CK_94:1476|d0be7efa-a6e0-4db2-9705-75bbc7faba6a	1387	0	1387	TRINITY_DN3649_c0_g1_i2	1496	81	1468	1381	6	+	1	1387,	0,	81,
CK_94:1878|29f1bfd7-2223-45c5-a5ac-f877c69b9771	1817	0	1817	TRINITY_DN2745_c0_g1_i11	4355	360	4204	1799	17	+	4	377,12,519,908,	0,377,390,909,	360,908,922,3296,
CK_98:1518|a6b9c6c4-a2fe-42c2-86e5-67ce112d8a56	1447	0	1447	TRINITY_DN6430_c0_g1_i2	1864	68	1640	1445	1	-	3	101,174,1171,	0,102,276,	68,169,469,
CK_98:343|3bf20df8-1108-4eeb-9636-561e37986fb9	251	0	251	TRINITY_DN10258_c2_g1_i2	1355	14	313	249	2	+	3	6,240,5,	0,6,246,	14,51,308,
CK_92:2770|baed31d1-9001-4d8f-8b23-158089bb6f5e	2705	0	2699	TRINITY_DN6262_c0_g1_i13	3047	28	2726	2684	14	-	2	37,2661,	6,44,	28,65,
CK_97:776|d2031a9c-57d2-4f2a-8b8a-be2924f28ee0	684	0	680	TRINITY_DN12434_c0_g1_i9	2429	500	1190	679	1	-	2	95,585,	4,99,	500,605,
CK_87:1229|815ad798-c810-406e-bfba-3136b54a67ca	1136	0	1135	TRINITY_DN25223_c0_g1_i6	3922	811	2302	1125	2	+	7	784,81,12,220,4,17,9,	0,784,865,877,1097,1109,1126,	811,1946,2028,2042,2263,2274,2293,
CK_88:459|49d2318d-473e-4311-8dcf-efbf4d2e75f0	370	0	370	TRINITY_DN6503_c0_g1_i7	4105	3695	4067	369	1	+	3	334,15,21,	0,334,349,	3695,4030,4046,
CK_94:557|9cae2197-a5b7-4624-8912-dbc3c687cb0e	463	0	463	TRINITY_DN52237_c1_g1_i1	1335	378	843	459	2	+	5	29,85,293,22,32,	0,30,115,408,431,	378,407,493,787,811,
CK_110:360|aec57cbf-e4ad-4f12-b21b-240f2bf6e443	252	0	252	TRINITY_DN3414_c1_g1_i6	3718	536	2325	252	0	-	3	6,116,130,	0,6,122,	536,656,2195,
CK_107:949|13c83d3a-906e-4d82-8132-8d730da65ba5	836	1	836	TRINITY_DN10779_c0_g2_i1	1372	443	1278	834	1	-	1	835,	0,	443,
CK_112:724|5531cf60-79d3-401d-bee5-9936a49df2b6	607	3	607	TRINITY_DN50129_c0_g1_i5	890	144	748	603	1	+	1	604,	3,	144,
CK_106:1881|4ffe0196-fd39-450f-931d-7769fbe1e3ef	1828	1	1828	TRINITY_DN1870_c1_g1_i3	2546	171	2471	1825	2	+	4	582,87,1152,6,	1,583,670,1822,	171,795,980,2465,
CK_98:1051|86ea7136-97d8-4132-9c78-93178c40d626	986	5	985	TRINITY_DN21722_c0_g2_i1	3104	60	2981	979	1	+	2	626,354,	5,631,	60,2627,
CK_90:1171|d7d06eec-314e-4128-97d8-ac085f105745	1083	0	1083	TRINITY_DN13098_c0_g1_i2	2147	110	1205	1076	2	+	9	9,9,647,3,67,29,108,179,27,	0,10,19,666,669,736,765,877,1056,	110,121,133,781,785,853,883,996,1178,
CK_87:599|8de185d6-9919-4de5-9837-71edb0fb1740	507	0	506	TRINITY_DN1661_c0_g1_i2	1202	65	1147	506	0	-	2	402,104,	1,403,	65,1043,
CK_113:1192|ae0cfbe7-8e08-40cc-8316-6955b575202f	1080	0	1080	TRINITY_DN19569_c0_g1_i3	2900	155	2727	1071	2	+	10	60,26,230,236,15,187,76,116,74,53,	0,64,90,320,556,571,761,837,953,1027,	155,227,987,1958,2196,2212,2405,2482,2599,2674,
CK_94:1285|188aaf13-b4ba-45b5-a6a0-bd7955d2f5d4	1194	0	1194	TRINITY_DN13464_c0_g3_i1	1772	90	1652	1192	2	-	3	939,240,15,	0,939,1179,	90,1395,1637,
CK_95:401|de58fd95-ffa3-4948-98ce-9489640d6617	309	0	309	TRINITY_DN30560_c0_g1_i1	1351	935	1243	306	0	+	2	67,239,	0,70,	935,1004,
CK_93:883|48fe51ac-4aea-4705-aa26-f28177d91f22	797	0	797	TRINITY_DN2747_c0_g1_i3	2683	221	2608	796	1	-	3	21,693,83,	0,21,714,	221,243,2525,
CK_100:1386|8973ed83-4f00-4101-8b95-2598e8de628c	1290	3	1290	TRINITY_DN3386_c0_g1_i5	1469	8	1441	1286	1	+	2	438,849,	3,441,	8,592,
CK_102:2036|8a3559cc-a322-4200-b744-607e373c90e1	1932	0	1932	TRINITY_DN232_c0_g1_i7	6977	650	5614	1929	3	-	3	267,151,1514,	0,267,418,	650,938,4100,
CK_95:516|9df16649-c675-488e-9492-f7878cc1c416	423	0	423	TRINITY_DN18534_c0_g2_i2	2972	298	726	419	4	-	2	9,414,	0,9,	298,312,
CK_99:1010|1b3319ae-6706-4d67-a03c-adac100017bf	914	0	914	TRINITY_DN71447_c0_g1_i2	5795	1314	2239	906	2	+	16	192,7,49,7,40,34,89,37,36,33,102,16,54,66,95,51,	0,192,199,248,255,296,330,420,457,494,527,630,646,700,767,863,	1314,1507,1515,1565,1573,1613,1648,1737,1775,1811,1848,1952,1972,2027,2093,2188,
CK_50:1048|50887b0d-c2e7-4d27-ab9a-0e23b8593c67	1004	5	1001	TRINITY_DN3107_c0_g1_i2	1146	49	1045	994	2	-	1	996,	3,	49,
CK_111:917|a00b7818-d3a9-46ad-97f0-b9b78b285987	808	1	808	TRINITY_DN47044_c0_g1_i29	1691	866	1678	803	2	-	6	22,232,38,32,462,19,	0,23,255,293,326,788,	866,888,1121,1162,1194,1659,
CK_91:372|2f716472-5d01-4b88-8c27-ab066594e581	275	0	275	TRINITY_DN13464_c0_g3_i1	1772	836	1255	274	0	-	3	5,217,52,	0,5,223,	836,848,1203,
CK_90:1664|15d4ba42-1d36-4d9b-a9d1-ef60c20dd016	1587	0	1587	TRINITY_DN2791_c1_g1_i7	1891	125	1870	1577	1	+	3	203,1363,12,	0,212,1575,	125,494,1858,
CK_98:316|8fda560f-1079-48ab-b539-fc7c82e00da9	221	0	219	TRINITY_DN7676_c0_g1_i11	4311	159	3642	219	0	-	2	142,77,	2,144,	159,3565,
CK_99:331|940966c9-90f0-4841-843a-15f7f5cf01bc	232	0	232	TRINITY_DN9220_c0_g1_i1	387	5	237	230	0	-	5	50,51,87,22,20,	0,51,102,189,212,	5,55,107,195,217,
CK_102:572|b29c6d28-779b-441a-a0ea-d12ab6f23c0c	465	0	465	TRINITY_DN8400_c0_g1_i19	3897	289	997	464	1	-	2	7,458,	0,7,	289,539,
CK_105:1443|4408f8c7-bfd6-4254-ae25-1ee31cb098ca	1349	2	1348	TRINITY_DN427_c5_g1_i3	1865	2	1558	1345	1	-	3	17,1010,319,	1,18,1028,	2,25,1239,
CK_105:2355|4cf10984-eb42-4a94-ad5c-f78cdc643940	2256	0	2256	TRINITY_DN38610_c0_g1_i4	3618	1104	3377	2236	5	+	14	13,22,3,102,224,22,41,12,17,57,63,37,21,1607,	0,13,35,38,140,364,386,427,441,458,519,589,626,649,	1104,1118,1143,1155,1259,1484,1507,1549,1562,1581,1640,1711,1749,1770,
CK_95:1049|3fa441d0-fe03-42ca-a3ea-2d48ff9837f2	958	1	958	TRINITY_DN894_c7_g1_i2	1664	638	1650	950	7	+	3	510,438,9,	1,511,949,	638,1153,1641,
CK_97:435|10b8493e-9d88-47d6-a204-d72b22689d60	327	2	327	TRINITY_DN2588_c2_g1_i1	958	625	958	324	1	-	4	191,46,84,4,	0,191,237,321,	625,820,869,954,
CK_87:1697|403d261f-1467-4ec5-b93b-d1dfc03551f6	1609	0	1609	TRINITY_DN7900_c0_g2_i10	2421	553	2173	1602	5	-	5	16,24,302,821,444,	0,16,42,344,1165,	553,570,601,905,1729,
CK_90:521|edb59cfb-7dbc-44d1-b358-c22a125858bb	431	0	430	TRINITY_DN24963_c0_g1_i1	1907	355	787	427	3	-	2	177,253,	1,178,	355,534,
CK_88:1111|830e21c6-ff3a-4fab-a867-77c2abfb4f79	1030	0	1030	TRINITY_DN28978_c0_g1_i5	3019	66	1096	1023	7	+	1	1030,	0,	66,
CK_84:909|b0ab85c1-36e2-493e-8273-2c42f99e70db	826	3	826	TRINITY_DN7245_c0_g1_i2	6358	4853	6327	823	0	+	2	386,437,	3,389,	4853,5890,
CK_100:394|08beb4c4-1f93-43a1-a792-a3fd9edd0c19	295	0	295	TRINITY_DN0_c10_g1_i8	2951	445	2927	293	2	+	3	64,6,225,	0,64,70,	445,2101,2702,
CK_103:1243|89a33c4b-2c1f-410f-a0c4-25fd19ee2c33	1142	4	1142	TRINITY_DN13236_c1_g1_i13	2126	945	2085	1131	6	-	2	9,1128,	0,10,	945,957,
CK_109:657|4240d719-1c32-4ffb-aa5c-3ccf013ca43f	545	0	541	TRINITY_DN2206_c0_g1_i3	1596	954	1495	540	1	+	1	541,	0,	954,
CK_101:1238|f313b293-77d2-430c-9ed5-128633d20e1d	1135	2	1131	TRINITY_DN264_c0_g1_i1	1304	149	1278	1126	3	-	1	1129,	4,	149,
CK_108:515|04968d00-de0d-456d-9c54-cabbc9bfc9e2	407	0	406	TRINITY_DN116428_c0_g1_i1	932	83	493	403	1	-	7	54,75,11,73,111,29,51,	1,55,131,143,216,327,356,	83,138,213,224,300,412,442,
CK_99:1006|08ef28e3-baa2-4282-846e-dc4122c4421a	908	1	905	TRINITY_DN10779_c0_g2_i1	1372	75	1296	902	1	-	5	158,3,68,438,236,	3,161,164,233,671,	75,236,240,308,1060,
CK_103:1712|5edfb957-a03f-4997-ac27-8197e55d64c5	1623	0	1622	TRINITY_DN28620_c0_g1_i4	2048	231	1897	1608	11	+	9	6,131,110,7,91,38,76,109,1051,	0,6,137,247,254,345,383,462,571,	231,251,404,515,525,617,656,736,846,
CK_90:1678|be528de1-748a-4ce5-bed3-9162b4aeff0f	1597	4	1592	TRINITY_DN8933_c0_g1_i1	1922	57	1825	1582	6	+	3	18,670,900,	4,22,692,	57,76,925,
CK_90:730|b0324dfa-3ba2-4f3e-a36f-d6f7dc33963a	641	0	641	TRINITY_DN18902_c0_g1_i1	1140	229	1109	635	1	-	8	6,27,254,47,181,33,57,31,	0,6,33,287,335,517,550,610,	229,472,502,757,804,985,1019,1078,
CK_105:3539|c5321198-6f02-47bb-875c-0ce3c43f59a9	3487	3	3481	TRINITY_DN383_c0_g1_i10	4709	1105	4689	3474	1	-	5	64,100,822,2196,293,	6,73,173,995,3191,	1105,1169,1270,2198,4396,
CK_99:3279|f2130e76-a3e7-4c8a-a331-eaebd9375262	3164	5	3164	TRINITY_DN20764_c0_g1_i3	3568	195	3557	3138	7	-	6	242,1974,14,204,175,536,	0,242,2223,2242,2446,2623,	195,638,2622,2640,2845,3021,
CK_92:2034|1d40c65c-d832-4e00-8bf8-f02180cf7be3	1943	1	1935	TRINITY_DN11411_c0_g1_i4	2055	82	2020	1931	3	+	3	30,1874,30,	1,31,1905,	82,115,1990,
CK_102:2095|0d76ead6-09e9-4d7a-b032-d85fe54ec221	1999	1	1997	TRINITY_DN3765_c0_g1_i17	3156	167	2261	1989	7	-	2	417,1579,	2,419,	167,682,
CK_93:3914|eb58f354-aed8-41a4-a666-8f80a8d0ccf4	3867	3	3865	TRINITY_DN4152_c0_g2_i1	4247	276	4183	3850	9	-	5	150,11,4,11,3683,	2,152,163,169,181,	276,444,456,475,500,
CK_106:916|7cf7abfa-0d7a-4cb6-bed3-c052ea5c434f	811	0	811	TRINITY_DN1550_c0_g1_i8	3065	2218	3043	811	0	+	2	318,493,	0,318,	2218,2550,
CK_93:355|2885497e-7e48-423b-b15c-0afe7f14646b	266	0	266	TRINITY_DN8418_c0_g2_i1	1214	415	974	266	0	-	2	39,227,	0,39,	415,747,
CK_96:3548|272de104-b532-495e-bdd2-f305fb1e0b73	3454	0	3454	TRINITY_DN7776_c0_g1_i4	15823	130	3586	3422	9	-	13	22,19,30,9,6,3,57,41,7,426,1921,41,849,	0,27,50,81,91,97,100,157,203,211,638,2560,2605,	130,152,171,201,210,218,222,280,329,341,769,2690,2737,
CK_101:2983|96963e9a-67f4-49fa-acf4-2c991112eb24	2899	3	2891	TRINITY_DN24989_c0_g1_i1	3177	76	2965	2880	2	-	2	2868,14,	8,2882,	76,2951,
CK_87:387|dcdb2fbf-5200-4677-9366-2131e070a8a3	304	0	303	TRINITY_DN12728_c1_g1_i5	4592	24	1004	303	0	-	3	187,7,109,	1,188,195,	24,212,895,
CK_86:516|ae7becea-39cd-4a1d-942c-fd78e383a7ca	430	0	430	TRINITY_DN3141_c0_g1_i4	4708	935	1491	426	4	+	2	204,226,	0,204,	935,1265,
CK_98:864|e892334c-3f88-414e-8ffc-7f3d53040a5f	775	0	771	TRINITY_DN42646_c0_g1_i1	1559	264	1200	769	0	-	2	454,315,	4,460,	264,885,
CK_106:733|97071776-363f-4040-a88c-3b1085ddb436	640	3	640	TRINITY_DN2863_c1_g1_i3	958	59	750	634	2	-	5	64,14,12,73,473,	0,64,78,91,164,	59,125,140,157,277,
CK_104:2095|b6302670-a9a7-424f-bbda-13121903afb7	2000	1	1995	TRINITY_DN84544_c0_g1_i5	2677	166	2284	1985	6	-	10	120,994,143,108,4,77,109,292,57,87,	5,125,1119,1262,1370,1375,1454,1563,1855,1912,	166,289,1400,1544,1655,1659,1736,1846,2139,2197,
CK_91:3905|9206f072-ee96-4572-8913-36ecb0b1a0a4	3834	0	3834	TRINITY_DN4092_c0_g1_i27	6150	83	4511	3808	18	+	11	984,657,1241,128,27,54,47,35,30,5,618,	0,984,1641,2882,3010,3038,3095,3142,3181,3211,3216,	83,1192,1927,3551,3680,3707,3765,3815,3856,3887,3893,
CK_98:730|d7c7f97a-02f7-4305-bce7-0cc7a023e694	638	1	638	TRINITY_DN4645_c2_g1_i10	2815	1511	2741	632	5	-	3	194,377,66,	0,194,571,	1511,2295,2675,
CK_86:430|0f5d80e8-d46e-4f1d-98d4-266ec0efbe95	353	1	353	TRINITY_DN19215_c0_g1_i3	3367	1536	2347	351	1	-	2	6,346,	0,6,	1536,2001,
CK_98:1579|93b0665c-62f0-4723-b84c-b413040c4aea	1492	0	1487	TRINITY_DN447_c0_g1_i7	4749	750	2424	1479	1	-	6	218,59,12,69,496,626,	5,223,289,301,370,866,	750,969,1034,1048,1224,1798,
CK_112:842|b159ad0a-b8a1-47d7-b288-45244c01791e	733	0	733	TRINITY_DN613_c0_g1_i2	3096	56	2400	731	2	-	2	644,89,	0,644,	56,2311,
CK_108:630|d486a00f-15cc-4306-8b79-72911a0778db	524	0	524	TRINITY_DN14764_c0_g2_i5	2168	1563	2122	520	2	+	4	400,36,79,7,	0,400,438,517,	1563,1964,2000,2115,
CK_94:313|7f07c007-c12e-4f88-befa-ced9ebad3dd3	221	0	221	TRINITY_DN16319_c0_g4_i1	3980	1852	2081	220	0	+	6	91,10,7,5,42,65,	0,91,101,108,114,156,	1852,1945,1956,1968,1973,2016,
CK_94:1877|d51ff18b-c71b-4db1-a3e4-42545bb27a77	1795	1	1795	TRINITY_DN2114_c0_g1_i2	3077	10	2051	1778	16	+	3	444,75,1275,	1,445,520,	10,700,776,
CK_91:1601|e937b023-1dce-4119-9be9-92cda3d97229	1530	1	1530	TRINITY_DN10643_c0_g2_i1	2234	31	1560	1529	0	-	1	1529,	0,	31,
CK_89:605|725c515d-bbb5-4f16-8e47-2a2da6463d48	516	0	516	TRINITY_DN91708_c0_g1_i1	1025	460	980	511	4	+	6	137,69,76,125,102,6,	0,137,206,282,407,510,	460,598,668,746,872,974,
CK_90:2733|aa2f7bcd-709d-4253-8adf-a91b1c42c522	2682	0	2682	TRINITY_DN15254_c0_g1_i2	3280	95	3280	2679	2	+	3	1729,944,8,	0,1729,2674,	95,2319,3272,
CK_110:1763|3a3177b0-6b00-4720-81a4-95d8ab99808d	1676	3	1676	TRINITY_DN3049_c0_g2_i1	2211	70	2149	1662	11	-	2	7,1666,	0,7,	70,483,
CK_68:409|4d2d57b6-4d76-476f-aa57-1fc0c7e6d898	342	0	342	TRINITY_DN2993_c1_g1_i7	1749	630	1044	341	1	+	3	150,187,5,	0,150,337,	630,794,1039,
CK_99:1419|28560f1d-6957-4ca3-889a-a713c480b856	1333	0	1333	TRINITY_DN2317_c0_g1_i18	4134	140	1786	1322	4	+	9	250,97,110,461,19,13,156,72,148,	0,250,347,457,919,944,957,1113,1185,	140,393,569,897,1360,1390,1405,1564,1638,
CK_111:1603|ddf14127-4df9-4c74-bb59-0e27e735cfe9	1495	3	1494	TRINITY_DN5558_c0_g2_i1	1855	124	1616	1487	4	+	2	617,874,	3,620,	124,742,
CK_91:509|d41063a7-64bb-4c55-ba4c-f8e54ec5ced4	419	0	419	TRINITY_DN2808_c1_g1_i21	2078	123	1793	419	0	-	2	188,231,	0,188,	123,1562,
CK_103:694|aa70c81f-5018-4f28-9194-98a75af9bca8	589	1	589	TRINITY_DN10215_c0_g1_i8	5482	2734	3319	584	1	+	3	69,403,113,	1,72,476,	2734,2803,3206,
CK_97:887|3a4d972b-0b77-41e6-806b-8ec44d691cae	796	0	793	TRINITY_DN1064_c3_g2_i1	1803	673	1493	790	3	-	3	584,3,206,	3,587,590,	673,1262,1287,
CK_103:1188|155a9e8f-c026-434d-a4a4-7d8a4ff50b91	1095	2	1091	TRINITY_DN1873_c0_g1_i1	5685	275	1395	1088	1	-	2	540,549,	4,544,	275,846,
CK_107:2540|e565e592-dfd4-43f7-b017-aa3b0897ef82	2453	0	2450	TRINITY_DN31130_c1_g2_i3	4199	276	3945	2448	1	-	5	55,960,8,285,1141,	3,59,1019,1027,1312,	276,331,1323,1365,2804,
CK_94:1198|539ab07d-7c44-4e52-af4e-8543da93eb40	1174	2	1169	TRINITY_DN2490_c2_g1_i10	1429	0	1429	1164	3	+	3	580,315,272,	2,582,897,	0,678,1157,
CK_100:841|632765e9-77ab-46b2-8223-928ff8cd60d7	738	0	738	TRINITY_DN14280_c0_g1_i1	2064	25	1319	737	1	-	2	552,186,	0,552,	25,1133,
CK_93:727|f742b0e7-2284-4e28-a2bc-67dbea0997ff	649	0	649	TRINITY_DN133_c5_g1_i11	1830	213	1763	644	5	+	4	118,231,171,129,	0,118,349,520,	213,447,1447,1634,
CK_90:640|b1bd4325-2bfb-41fb-b092-1e96e9f739ce	546	0	546	TRINITY_DN4582_c3_g1_i3	1390	680	1358	543	1	-	4	7,17,139,381,	0,7,25,165,	680,819,838,977,
CK_90:2033|71577922-1796-4690-a21a-95f8dee37e0e	1957	0	1952	TRINITY_DN4209_c0_g1_i4	4326	2208	4304	1942	0	+	5	955,896,61,20,10,	0,955,1853,1914,1942,	2208,3316,4212,4274,4294,
CK_84:2050|50d8119e-7e1d-41a8-b7d4-6df4f95b0600	2008	2	2008	TRINITY_DN7028_c0_g1_i1	2434	32	2049	1993	13	-	3	290,1653,63,	0,290,1943,	32,326,1986,
CK_94:404|b1ed1c4b-8b98-4ac8-ad38-73b2dc6edb41	310	0	310	TRINITY_DN21710_c0_g2_i2	1168	526	834	307	0	-	2	223,84,	0,226,	526,750,
CK_95:413|926cf5ad-04d1-4630-bf73-ce2cfd3380c4	320	0	319	TRINITY_DN1768_c1_g1_i2	2019	91	1117	319	0	+	3	42,4,273,	0,42,46,	91,685,844,
CK_89:669|0a9ab344-7455-4612-b188-d4672f1cfd1e	588	1	588	TRINITY_DN3388_c0_g1_i1	911	44	899	585	2	+	3	142,5,440,	1,143,148,	44,198,459,
CK_94:1258|550bf0db-d907-47e0-9f99-e09b882d2b40	1159	0	1159	TRINITY_DN13026_c0_g1_i11	2466	47	1273	1155	4	+	3	393,749,17,	0,393,1142,	47,505,1256,
CK_105:491|4a9d3a3f-4b00-4c3d-9eb1-80966708b1bd	383	0	382	TRINITY_DN550_c3_g1_i4	1317	152	1209	380	2	+	2	156,226,	0,156,	152,983,
CK_66:1101|9b87e906-222a-4ac0-8850-ac8e34bb4456	1046	2	1043	TRINITY_DN13387_c0_g1_i7	1490	194	1353	1037	4	-	3	354,2,685,	3,357,359,	194,661,668,
CK_89:489|21bb7831-1790-47c8-a0ec-3cab38789772	406	0	405	TRINITY_DN3481_c1_g2_i2	1203	162	1031	404	1	-	3	139,162,104,	1,140,302,	162,309,927,
CK_102:2669|eb4baf63-5d42-49fc-9b80-3d62ae12d752	2532	8	2532	TRINITY_DN2546_c0_g1_i1	3399	81	3391	2515	8	+	8	414,18,424,88,500,1056,12,11,	8,422,441,865,953,1453,2509,2521,	81,541,559,1112,1699,2309,3366,3380,
CK_90:1207|68402d32-8042-4432-8dea-e035ade6d6f4	1123	0	1123	TRINITY_DN851_c0_g1_i15	4253	2406	3971	1117	5	-	3	888,206,28,	0,888,1095,	2406,3737,3943,
CK_89:1775|70cf4786-515f-4ae3-bcc1-ec403990b042	1675	0	1673	TRINITY_DN1684_c1_g1_i1	2382	177	2240	1663	10	-	2	1581,92,	2,1583,	177,2148,
CK_109:326|466c2e62-773d-44e3-a1bf-642f8abda03a	217	0	217	TRINITY_DN35613_c1_g2_i1	698	234	458	216	0	-	3	43,120,53,	0,44,164,	234,282,405,
CK_93:3640|a7b30ab3-1c34-4663-8f56-5b2b85d6352b	3571	2	3571	TRINITY_DN5270_c0_g1_i7	4567	1004	4564	3542	8	-	7	2189,755,86,383,7,110,20,	0,2189,2944,3030,3413,3436,3549,	1004,3194,3950,4038,4422,4434,4544,
CK_93:1206|5f1331b3-9b58-4a41-b312-3cff92cb6c8b	1144	9	1143	TRINITY_DN1799_c0_g2_i3	1990	748	1971	1134	0	+	3	411,158,565,	9,420,578,	748,1173,1406,
CK_87:318|3c406b89-26b9-4816-bd9f-2b3506266a64	231	0	231	TRINITY_DN5100_c3_g1_i4	4303	1365	2672	230	1	-	2	92,139,	0,92,	1365,2533,
CK_89:507|cb73662e-9541-4791-85c6-d22dd02883cb	420	0	420	TRINITY_DN691_c0_g1_i6	1568	1139	1563	416	4	+	5	22,11,347,10,30,	0,22,33,380,390,	1139,1162,1174,1522,1533,
CK_103:633|d503090e-00d2-4e48-aa99-b13e29a3545f	539	0	539	TRINITY_DN4406_c1_g1_i2	3926	2	541	536	3	-	1	539,	0,	2,
CK_90:682|985958bf-90bd-4c03-b215-07a85ef8e47f	596	0	592	TRINITY_DN3388_c0_g1_i1	911	47	892	592	0	+	3	484,90,18,	0,484,574,	47,782,874,
CK_89:795|e9966424-c178-46ed-81b0-51c65584d065	706	0	706	TRINITY_DN73859_c0_g1_i1	2157	468	1178	699	6	-	6	196,40,260,154,30,25,	0,196,236,497,651,681,	468,665,706,966,1121,1153,
CK_88:474|50458596-36ac-42ca-ab81-114f59a8378f	387	0	387	TRINITY_DN44203_c0_g1_i2	1343	200	858	385	2	+	3	286,89,12,	0,286,375,	200,491,846,
CK_95:1389|0aafb735-a611-4054-84d4-60a8fb2e2ea4	1324	1	1324	TRINITY_DN140723_c0_g1_i2	1913	207	1540	1313	6	+	8	48,430,6,128,32,9,78,588,	1,49,479,486,614,646,655,736,	207,257,688,694,823,857,868,952,
CK_89:702|1b811299-1ae1-4696-b00a-a876d25dd3a9	613	0	613	TRINITY_DN13031_c0_g1_i1	1896	788	1421	609	3	+	4	103,181,320,8,	0,103,285,605,	788,892,1073,1413,
CK_87:2173|694cb5f7-8bce-4242-8dc9-74e297cfd8f7	2093	3	2093	TRINITY_DN7421_c0_g1_i1	2253	0	2233	2078	9	-	5	7,80,1535,407,58,	0,7,89,1625,2032,	0,150,230,1765,2175,
CK_99:899|26a60647-86d8-4974-bb0e-276e84a6a828	823	0	822	TRINITY_DN4399_c0_g1_i1	2144	924	1747	816	4	+	4	466,22,227,105,	0,468,490,717,	924,1390,1414,1642,
CK_96:2308|f50c723f-30db-4e50-96ea-e9afa5878d1e	2210	0	2210	TRINITY_DN7508_c0_g1_i4	2544	140	2536	2202	7	-	4	114,207,1220,668,	0,114,321,1542,	140,334,648,1868,
CK_98:930|7a8aa176-bdef-405d-ab6e-2b3935f2cc2d	838	0	837	TRINITY_DN1286_c0_g1_i3	1821	895	1762	835	2	+	2	328,509,	0,328,	895,1253,
CK_105:1766|d08078dc-c3f4-4318-b6be-60aba5f85015	1669	4	1669	TRINITY_DN7727_c0_g1_i3	2453	401	2368	1663	2	+	5	35,526,11,124,969,	4,39,565,576,700,	401,438,979,998,1399,
CK_100:2145|bbcd8779-86df-4fef-9083-8b6bf11be747	2065	2	2064	TRINITY_DN38352_c0_g1_i2	2478	116	2363	2051	6	-	5	224,988,20,101,724,	1,225,1213,1238,1339,	116,341,1330,1359,1639,
CK_93:564|d797e581-e709-49b3-bb9f-fbda3d2f3c0e	469	0	469	TRINITY_DN6770_c0_g2_i1	2080	1554	2024	467	2	+	2	376,93,	0,376,	1554,1931,
CK_91:415|56bda598-444f-4bb7-9182-dba6c8b9ab5f	343	0	343	TRINITY_DN8793_c0_g1_i1	1347	909	1262	342	1	+	2	328,15,	0,328,	909,1247,
CK_100:906|3972901a-a551-4f59-9173-c97760fcf1ac	809	0	808	TRINITY_DN501_c0_g1_i10	3479	2439	3389	803	3	+	4	197,525,14,70,	0,197,722,738,	2439,2779,3305,3319,
CK_109:492|40653b40-1435-45f5-9840-dc5d16d16ebe	385	0	385	TRINITY_DN9144_c0_g1_i1	2357	463	1206	385	0	+	2	6,379,	0,6,	463,827,
CK_104:661|c5f8f827-06c3-4ced-8b5c-d19d3c928f7f	556	3	556	TRINITY_DN8548_c1_g1_i1	1865	1192	1745	551	2	-	1	553,	0,	1192,
CK_105:1524|5517e87a-66ca-4ac1-aeda-e2c1245059b4	1436	2	1435	TRINITY_DN78081_c0_g1_i3	2102	111	1547	1429	1	+	4	1006,63,208,153,	2,1009,1074,1282,	111,1117,1184,1394,
CK_92:1746|cafca7c7-72f8-4364-9e32-f24cfe47c175	1679	0	1676	TRINITY_DN2150_c30_g1_i1	2512	336	2108	1669	7	-	4	5,411,1149,111,	3,8,419,1568,	336,344,756,1997,
CK_107:731|0c3f4979-4391-492a-b47f-0c34e98c5135	628	1	625	TRINITY_DN8409_c0_g1_i7	2075	68	1285	623	1	-	2	202,422,	3,205,	68,863,
CK_102:742|26565caf-03b2-4642-942c-bd2b03f5463c	648	0	648	TRINITY_DN318_c0_g1_i13	2195	189	1128	642	5	+	2	324,323,	0,325,	189,805,
CK_87:735|bc47faa2-e36e-4ef1-b04b-f247e9ad2df0	650	3	650	TRINITY_DN26455_c0_g3_i1	1507	413	1060	646	1	+	1	647,	3,	413,
CK_98:1650|24f42497-ac6c-4121-bfae-8191590044da	1567	1	1567	TRINITY_DN19485_c0_g1_i4	1771	168	1733	1557	7	-	3	37,8,1519,	0,37,47,	168,206,214,
CK_92:632|74526e22-80d0-44c1-b995-a5071fe4ffd8	545	1	544	TRINITY_DN3259_c0_g1_i6	2291	1042	2158	540	2	+	4	200,5,127,210,	1,201,207,334,	1042,1243,1248,1948,
CK_106:543|3dd21e79-78c9-449c-a39b-e8906f868bcc	437	0	437	TRINITY_DN26450_c1_g1_i1	3048	545	984	433	4	+	3	145,170,122,	0,145,315,	545,691,862,
CK_92:841|11197a09-7edf-4c0c-9a93-95b5be840c0a	755	0	755	TRINITY_DN2654_c3_g2_i1	1252	247	1015	754	0	-	5	14,126,11,293,310,	0,15,141,152,445,	247,267,395,407,705,
CK_109:341|5a7953f0-13d0-42bb-a7bd-57dd0836b10c	233	0	233	TRINITY_DN27129_c0_g1_i8	3322	2440	2687	231	2	+	3	157,13,63,	0,157,170,	2440,2599,2624,
CK_103:3031|b63e8484-55a7-45c1-aa77-bae5d439fe32	2952	2	2943	TRINITY_DN4617_c0_g1_i1	3640	94	3576	2936	5	-	3	400,1460,1081,	9,409,1869,	94,916,2495,
CK_89:487|d221335f-d1b3-4155-8c7f-7b987fb977ba	399	0	399	TRINITY_DN44379_c0_g5_i1	1373	628	1028	396	2	+	3	351,16,31,	0,351,368,	628,981,997,
CK_101:942|5df7116d-9a80-4e50-b3ba-f51edd23a6af	845	2	844	TRINITY_DN20746_c0_g1_i2	1183	167	1128	837	5	-	3	149,112,581,	1,150,262,	167,317,547,
CK_89:290|f604607c-031a-4a1e-90d9-0e08eecb350d	200	0	200	TRINITY_DN23746_c0_g1_i2	1191	42	242	200	0	-	1	200,	0,	42,
CK_103:692|d2b3602e-f64b-4a7f-bde7-40b923ab8354	583	0	581	TRINITY_DN1151_c1_g1_i3	1373	52	891	578	2	-	5	152,8,61,354,5,	2,154,162,224,578,	52,207,225,286,886,
CK_106:853|46790a91-401f-4577-9a48-94d1c7cbe5ed	758	2	757	TRINITY_DN686_c0_g1_i7	1136	171	926	751	4	+	1	755,	2,	171,
CK_102:1393|e83c1e31-d790-48c0-b3d7-a948d1dd2184	1296	2	1296	TRINITY_DN19789_c0_g1_i1	1564	13	1327	1286	6	-	7	10,65,6,9,673,317,212,	0,10,76,82,91,764,1082,	13,38,105,112,123,798,1115,
CK_104:582|6375bb2d-42f3-43ce-96a6-a08f2a589f12	490	2	489	TRINITY_DN510_c3_g1_i1	1439	74	867	487	0	-	2	185,302,	1,186,	74,565,
CK_109:2899|43e82909-a14d-4da2-845b-a7d63aab16a1	2864	11	2860	TRINITY_DN6719_c0_g1_i6	3868	106	3687	2843	6	-	3	1080,555,1214,	4,1084,1639,	106,1816,2473,
CK_98:579|800dfe90-ac72-4fcc-a2ce-9a634cafb966	483	0	481	TRINITY_DN4589_c0_g1_i1	5094	4160	4655	481	0	+	2	49,432,	0,49,	4160,4223,
CK_84:341|b0fa4bd2-9ba9-4ca9-8ce7-610a53ab572d	257	0	257	TRINITY_DN33316_c0_g1_i2	1989	147	1303	256	1	-	4	45,4,82,126,	0,45,49,131,	147,497,1094,1177,
CK_90:772|0c1e2e42-6540-47dd-bace-5bc3de907db1	682	0	682	TRINITY_DN7242_c3_g1_i1	830	58	744	676	6	+	4	35,136,46,465,	0,35,171,217,	58,94,231,279,
CK_101:738|fcc4178d-06f7-426b-9e49-b35ebd577197	639	0	639	TRINITY_DN39509_c0_g3_i2	4062	208	852	633	1	-	7	158,391,28,17,13,8,19,	0,160,551,579,599,612,620,	208,369,762,791,809,824,833,
CK_99:843|830c28cd-b565-4c53-9a54-89ac2239e174	743	1	743	TRINITY_DN17951_c1_g1_i2	1999	372	1114	738	2	-	5	55,149,44,384,108,	0,56,205,250,634,	372,427,577,621,1006,
CK_87:879|b07a5623-d2d2-41f0-a0ad-469383aa154c	799	0	798	TRINITY_DN13387_c0_g1_i7	1490	515	1351	792	4	-	2	45,751,	1,48,	515,600,
CK_109:544|bf7cb276-bc0f-4ed2-96bd-6a5b920b2300	434	1	433	TRINITY_DN3017_c1_g1_i2	4467	46	603	432	0	-	2	86,346,	1,87,	46,257,
CK_91:379|d29b32c4-1740-4c7c-b7bd-88df0fb7b389	286	0	286	TRINITY_DN17365_c0_g1_i1	759	452	759	285	1	+	2	254,32,	0,254,	452,727,
CK_92:2878|0a334b48-d1c0-4898-b843-61dac229873a	2800	0	2798	TRINITY_DN664_c0_g1_i6	3291	339	3171	2778	12	-	3	504,10,2276,	2,507,524,	339,843,895,
CK_96:313|92b46b09-ae49-4ba3-a958-74f4b42d29dd	216	0	216	TRINITY_DN65320_c5_g1_i1	867	159	375	216	0	-	1	216,	0,	159,
CK_89:1164|130eab43-bfbd-4cde-baaa-e289047c7bfc	1097	0	1093	TRINITY_DN7676_c0_g1_i11	4311	1632	2736	1087	4	+	3	246,155,690,	0,248,403,	1632,1879,2046,
CK_100:650|f51835ce-6b72-4535-8310-ad5e834034ec	553	1	553	TRINITY_DN9128_c1_g2_i1	616	8	561	548	3	+	3	407,64,80,	1,409,473,	8,415,481,
CK_100:425|89e1e3eb-d17b-47a4-87e5-27d4354a6778	324	0	324	TRINITY_DN8048_c0_g3_i1	760	15	516	322	2	-	2	318,6,	0,318,	15,510,
CK_94:1238|aeaca32a-7fac-49b1-a7ae-131bad44a215	1157	0	1157	TRINITY_DN4202_c2_g1_i6	4931	57	2672	1150	6	-	4	518,505,106,27,	0,519,1024,1130,	57,575,2536,2645,
CK_91:442|17e10aa4-b4bd-44b8-a6d3-2a0c7cfcc2d2	353	0	353	TRINITY_DN39914_c0_g3_i3	3047	37	400	350	3	+	6	113,67,6,16,4,147,	0,113,180,186,202,206,	37,151,222,229,248,253,
CK_101:420|46e1057c-4d4d-4682-ad6c-0dfd3d3cb344	320	0	320	TRINITY_DN21437_c0_g1_i1	1315	714	1034	318	2	+	1	320,	0,	714,
CK_93:6085|f3ecbb1f-fc6e-4271-bab9-24e6d19fed1b	6007	2	6004	TRINITY_DN5315_c0_g1_i13	12313	19	6141	5992	10	+	2	3908,2094,	2,3910,	19,4047,
CK_84:425|750c3ee8-81ca-4bfc-9cde-9735cd6f47c3	340	2	340	TRINITY_DN591_c1_g1_i1	1050	392	855	337	1	-	4	22,6,149,161,	0,22,28,177,	392,418,430,694,
CK_94:516|06d9a2a1-da4c-4f76-9ead-ba2517931228	422	0	422	TRINITY_DN3481_c1_g2_i2	1203	20	476	420	2	-	3	6,249,167,	0,6,255,	20,52,309,
CK_92:1683|5a222abe-097c-4e55-b737-506fad16738c	1628	0	1628	TRINITY_DN4092_c0_g1_i27	6150	1730	4817	1615	2	+	3	119,1046,452,	0,119,1176,	1730,1927,4365,
CK_89:850|7fde5b34-934a-4f27-89e8-566859ca7c05	766	0	766	TRINITY_DN28978_c0_g1_i5	3019	544	1500	762	2	+	5	653,52,32,22,5,	0,654,707,739,761,	544,1197,1249,1282,1495,
CK_93:627|fea00cd7-e3a8-4d4e-a338-dbb4f3545b6e	530	0	529	TRINITY_DN588_c1_g1_i2	3435	58	3164	529	0	-	2	218,311,	1,219,	58,2853,
CK_106:315|30c1feee-ee12-417f-8223-94a54fa61875	209	0	209	TRINITY_DN36752_c1_g3_i1	818	417	626	209	0	+	1	209,	0,	417,
CK_97:2024|09f63195-aeb1-4f29-a91b-d7f85c3af819	1929	3	1923	TRINITY_DN8527_c1_g1_i1	2264	296	2216	1919	1	+	1	1920,	3,	296,
CK_65:502|90837f04-5401-40b5-acad-c1643e66717b	434	1	434	TRINITY_DN9257_c1_g1_i16	981	59	493	430	0	-	3	152,48,230,	0,153,203,	59,211,263,
CK_90:325|928400d5-7ce3-48cd-b19b-e0551304c232	235	0	235	TRINITY_DN1616_c0_g1_i1	2074	1317	1613	235	0	+	2	227,8,	0,227,	1317,1605,
CK_91:479|91d9db7e-4a75-4bc3-8b50-b92558042ce5	390	0	390	TRINITY_DN4406_c0_g1_i3	3945	581	1029	389	1	+	2	385,5,	0,385,	581,1024,
CK_96:1610|65cd3a25-1668-4bc1-ba41-4c15807a697b	1535	0	1528	TRINITY_DN10138_c0_g1_i8	2391	75	1630	1527	1	-	2	640,888,	7,647,	75,742,
CK_104:774|ff44bd1a-b5fd-4f2d-92e0-365a9ca64fad	677	1	675	TRINITY_DN3626_c0_g1_i8	2771	55	729	671	3	-	1	674,	2,	55,
CK_89:988|47c8c789-7a66-41ce-a6de-564502282e0b	923	0	923	TRINITY_DN9661_c0_g1_i7	2522	46	2423	915	6	+	3	574,158,189,	0,574,734,	46,1405,2234,
CK_104:395|01d30f71-6ea5-4a75-92e6-6390de6a2f3a	292	1	292	TRINITY_DN10242_c0_g1_i1	857	29	588	290	1	+	2	285,6,	1,286,	29,582,
CK_89:990|2c1dfec4-6b12-440b-a92f-be42f9fab784	913	0	913	TRINITY_DN3767_c7_g1_i1	1375	34	1224	904	9	+	4	60,299,253,301,	0,60,359,612,	34,95,397,923,
CK_105:954|652b1e03-c845-4392-9e01-5558b3c39546	861	0	860	TRINITY_DN3822_c0_g1_i2	1899	814	1821	856	4	+	4	206,432,214,8,	0,206,638,852,	814,1033,1598,1813,
CK_101:692|38937d56-1482-40c2-8a74-c1969fdb6aaf	601	2	599	TRINITY_DN2746_c0_g2_i2	1635	580	1364	596	1	+	2	365,232,	2,367,	580,1132,
CK_91:1620|20b031f6-65bf-4b0c-9aba-1c50b76d255d	1538	0	1538	TRINITY_DN9375_c0_g1_i2	3077	338	1877	1528	9	+	3	1036,5,496,	0,1036,1042,	338,1376,1381,
CK_87:2481|8ef44b33-2d3e-458c-964d-c3324cb90859	2412	7	2412	TRINITY_DN7420_c0_g1_i1	2649	115	2612	2399	6	+	2	2145,260,	7,2152,	115,2352,
CK_87:696|5bb80428-032e-484f-afd7-4ef08a1ff085	619	0	619	TRINITY_DN61907_c0_g1_i12	1954	10	644	618	1	-	2	13,606,	0,13,	10,38,
CK_89:2879|ee2e48e0-be6c-4b55-b3c2-26884e1db1bc	2810	6	2810	TRINITY_DN4771_c0_g1_i33	4725	1801	4640	2803	1	-	3	6,707,2091,	0,6,713,	1801,1834,2549,
CK_93:608|bb6ea54f-6a91-45d8-86dd-2f2ce58789e9	512	0	512	TRINITY_DN3388_c0_g1_i1	911	44	905	508	4	+	2	213,299,	0,213,	44,606,
CK_99:445|ee773a66-da2b-4c7c-915b-17cf14c77b34	347	0	346	TRINITY_DN8375_c1_g1_i6	3162	2760	3106	346	0	+	1	346,	0,	2760,
CK_106:543|b409792d-1167-4c4f-a102-8123becc92b8	436	0	436	TRINITY_DN6226_c0_g1_i19	3348	2849	3286	435	1	+	2	411,25,	0,411,	2849,3261,
CK_94:2742|c244ac97-58bf-4dfc-a5ef-595717b766cb	2671	0	2667	TRINITY_DN273_c0_g1_i1	4533	123	3944	2646	8	+	6	21,266,607,92,1659,9,	0,23,290,897,989,2658,	123,144,410,1044,2265,3935,
CK_96:477|29692ac4-50c2-4e93-9d0c-29d9acac4f4c	382	0	382	TRINITY_DN1157_c5_g1_i1	1287	64	1152	381	0	+	3	130,7,244,	0,131,138,	64,198,908,
CK_85:458|d7610bbc-1cca-4db5-b0d9-5737c0fae529	368	0	368	TRINITY_DN1436_c2_g1_i5	2908	791	1507	368	0	+	2	362,6,	0,362,	791,1501,
CK_103:1836|44db3542-813a-4da7-bb8e-62b9f5181baf	1736	0	1736	TRINITY_DN8900_c0_g1_i1	2884	235	2843	1733	3	-	3	152,1456,128,	0,152,1608,	235,988,2715,
CK_91:957|256b4fa4-3689-4e4b-929b-30817d0a76ab	870	0	870	TRINITY_DN11374_c0_g1_i1	1456	4	1402	866	4	-	4	89,130,644,7,	0,89,219,863,	4,95,750,1395,
CK_103:1369|82cd82a0-f1fa-4254-8325-a9fbefdc1546	1275	3	1274	TRINITY_DN11414_c0_g1_i4	1960	268	1539	1263	4	+	3	1236,12,19,	3,1240,1255,	268,1504,1520,
CK_87:774|8ffe39e6-bbab-47ff-8d7f-5e35780c2726	725	0	725	TRINITY_DN2428_c0_g1_i1	1629	11	741	718	5	+	3	33,66,624,	0,34,101,	11,44,117,
CK_102:318|0a85b58a-aced-4b5d-90fd-bbbe712ff5b6	222	0	222	TRINITY_DN6366_c0_g1_i1	850	495	720	221	1	-	3	206,3,13,	0,206,209,	495,703,707,
CK_93:471|daa2effc-48c6-43e1-a722-a2643450077a	385	0	383	TRINITY_DN15593_c0_g1_i1	919	63	744	382	1	-	2	377,6,	2,379,	63,738,
CK_101:525|247e94a6-c615-419d-9413-e37e160e0528	424	0	424	TRINITY_DN77897_c0_g1_i1	910	167	595	421	3	-	2	59,365,	0,59,	167,230,
CK_91:1337|a4b0a296-3b59-4f5b-be5f-ec1b8bfb11ba	1260	0	1258	TRINITY_DN36683_c0_g1_i8	2368	348	1969	1252	6	-	3	432,590,236,	2,434,1024,	348,998,1733,
CK_111:372|3d4e42f7-4c22-4a47-ab84-c3ae67ff498f	266	1	266	TRINITY_DN21340_c0_g1_i1	429	5	281	265	0	+	2	260,5,	1,261,	5,276,
CK_86:431|8c88b13e-95c9-4c41-a1a3-2c9e8254b157	341	0	341	TRINITY_DN9480_c0_g1_i28	2188	1679	2027	338	1	+	3	175,47,117,	0,177,224,	1679,1858,1910,
CK_104:519|fbac6a9d-489a-407a-bc17-a5d509b4d90e	414	0	414	TRINITY_DN9772_c0_g1_i4	4052	1322	1743	410	3	+	3	15,26,372,	0,15,42,	1322,1340,1371,
CK_103:1238|dab4e77e-7b58-4251-84dc-f5b8f5c5fe26	1158	1	1158	TRINITY_DN41003_c0_g1_i1	1567	42	1302	1153	4	-	3	880,10,267,	0,880,890,	42,923,1035,
CK_96:1823|efac80df-eed7-473e-a5d0-801ca12669d9	1758	5	1758	TRINITY_DN26293_c0_g1_i14	2021	0	1753	1747	6	+	1	1753,	5,	0,
CK_101:1893|84ffb5a3-03b1-4057-981f-2882e67db2bb	1810	2	1808	TRINITY_DN2319_c0_g1_i2	5372	2125	4744	1799	7	-	7	183,716,791,7,15,5,89,	2,185,901,1692,1699,1714,1719,	2125,3010,3732,4524,4625,4641,4655,
CK_83:627|4b902c2d-58fc-4221-a4f5-fc44511ad534	546	0	545	TRINITY_DN29373_c0_g1_i1	1479	863	1408	543	2	+	1	545,	0,	863,
CK_101:946|8fd15117-be12-4392-bdc8-fd1eb7700aab	850	1	848	TRINITY_DN28624_c0_g1_i13	2583	394	2211	845	2	-	2	355,492,	2,357,	394,1719,
CK_88:1058|987d0ae4-5e6d-49bb-add4-ea6aa6467a35	993	0	993	TRINITY_DN5604_c0_g3_i2	3004	281	1433	987	6	-	2	387,606,	0,387,	281,827,
CK_94:1109|dc74af2e-c8f0-473b-8e54-e374d526c48d	1022	0	1020	TRINITY_DN4341_c0_g1_i7	2446	99	1951	1019	0	+	6	602,80,43,193,13,88,	0,602,682,725,919,932,	99,917,1521,1656,1849,1863,
CK_139:602|4a464768-e767-40b6-9ce0-53f6521c2111	474	1	474	TRINITY_DN5162_c0_g1_i1	1293	0	512	473	0	-	2	8,465,	0,8,	0,47,
CK_459:1637|e7ca1fd9-2e32-4caf-be0d-6ca555f7c772	1188	0	1188	TRINITY_DN7652_c0_g1_i4	3991	611	1970	1182	5	+	3	1106,72,9,	0,1106,1179,	611,1889,1961,
CK_86:921|d4935eaa-c232-42ff-9643-b9c763b48bb7	842	4	842	TRINITY_DN3157_c0_g1_i2	1327	16	1306	835	3	+	2	832,6,	4,836,	16,1300,
CK_86:813|ca0784fe-1e66-4bea-9018-261354fd7b84	742	0	740	TRINITY_DN3700_c0_g1_i2	2813	327	1251	737	3	-	2	94,646,	2,96,	327,605,
CK_96:3999|0190e258-a393-42bc-878e-4c3feb14314b	3943	7	3943	TRINITY_DN5519_c0_g1_i1	4449	196	4443	3910	18	+	6	16,1358,988,762,435,369,	7,24,1382,2377,3139,3574,	196,217,1887,2875,3638,4074,
CK_90:1005|e8972482-ac2f-4a52-bfc1-6a022f7f9ff7	913	0	913	TRINITY_DN15309_c0_g1_i2	2126	899	1816	904	6	+	5	475,10,77,37,311,	0,476,486,564,602,	899,1379,1391,1468,1505,
CK_94:2224|bdc24fc6-0f60-4296-8b0e-11a542469e68	2136	0	2129	TRINITY_DN9529_c0_g1_i6	2676	10	2260	2121	7	+	5	119,34,1616,148,211,	0,119,153,1769,1918,	10,165,208,1901,2049,
CK_103:1354|1b7621eb-400b-4dde-a0ae-fafff5fd06bd	1263	2	1262	TRINITY_DN16167_c0_g1_i3	1841	111	1377	1259	1	+	4	1209,4,32,15,	2,1211,1215,1247,	111,1322,1327,1362,
CK_98:328|ca04f36e-ddcb-4ca9-a8ee-e11479f0042e	230	0	230	TRINITY_DN70239_c0_g1_i1	436	101	330	228	1	+	2	4,225,	0,5,	101,105,
CK_99:4949|965ee77c-58d5-44ef-a161-d84cf746932b	4901	3	4901	TRINITY_DN5314_c1_g1_i9	9840	16	4968	4869	17	+	8	22,109,1651,3018,4,40,20,22,	3,25,134,1785,4805,4809,4857,4879,	16,39,199,1852,4873,4878,4925,4946,
CK_83:495|802c1d46-4b99-4ec7-b6ea-a781f8666316	412	0	412	TRINITY_DN29720_c0_g1_i2	3960	383	800	409	0	-	8	9,43,76,107,66,10,87,11,	0,9,54,130,237,303,313,401,	383,393,436,513,621,690,702,789,
CK_86:1472|06182434-cc32-45c7-b82e-e400ef1b0965	1398	0	1397	TRINITY_DN6012_c0_g1_i6	1832	146	1796	1390	4	+	5	26,11,947,77,333,	0,26,37,984,1064,	146,175,433,1386,1463,
CK_88:935|29b5281b-128d-4c5f-b0b0-8bae6ac6e427	850	0	850	TRINITY_DN3746_c0_g1_i4	4978	553	2877	847	1	+	7	555,155,75,8,22,27,6,	0,555,710,786,795,817,844,	553,2219,2376,2454,2464,2490,2871,
CK_109:3034|bbf09b37-f598-4040-aab2-b2a2f58fbe01	2940	3	2940	TRINITY_DN2225_c0_g1_i2	3922	67	3732	2936	1	-	3	261,179,2497,	0,261,440,	67,413,1235,
CK_460:749|4129ed72-68ac-43a5-b1a5-9145c28afb8b	296	0	296	TRINITY_DN2152_c0_g1_i1	961	0	406	295	1	-	4	6,102,177,11,	0,6,108,285,	0,104,209,395,
CK_96:1098|68b32378-2681-4b1d-8f8d-d0fe12cfbe8c	1025	0	1025	TRINITY_DN5330_c0_g1_i8	7042	3235	4442	1023	1	+	2	368,656,	0,369,	3235,3786,
CK_89:3311|e2e4f8b7-56c2-4418-bb56-ccc21dd847be	3238	0	3224	TRINITY_DN14298_c0_g1_i22	3618	34	3429	3216	3	-	8	125,51,38,2059,112,5,301,528,	14,139,191,229,2291,2403,2409,2710,	34,160,211,250,2310,2425,2432,2901,
CK_88:806|60bcc8ec-5bac-4a57-b10f-65bd0feaecb9	713	0	713	TRINITY_DN12022_c0_g1_i54	3165	933	3062	706	2	+	6	21,7,8,60,503,109,	0,21,28,39,99,604,	933,956,964,972,2450,2953,
CK_89:1168|0af4a2cd-04ca-43a6-9f8f-e4d25140c21c	1086	0	1085	TRINITY_DN5847_c0_g2_i5	1367	126	1214	1076	7	+	4	889,107,63,24,	0,891,998,1061,	126,1016,1126,1190,
CK_104:531|8df73a8c-de49-45bf-8393-33736ec8ce70	437	0	437	TRINITY_DN25831_c0_g1_i6	3254	61	594	437	0	-	2	125,312,	0,125,	61,282,
CK_101:2836|5c3a62d8-3a16-4c48-b56d-35f5b083ca48	2759	3	2759	TRINITY_DN18161_c0_g1_i2	4287	706	4242	2743	10	+	4	2642,4,5,102,	3,2647,2652,2657,	706,3349,3353,4140,
CK_109:350|faefbad9-eb26-4359-bacd-bc20d2b763d9	239	0	239	TRINITY_DN529_c0_g1_i6	1817	892	1172	238	0	-	4	9,190,3,36,	0,9,200,203,	892,936,1128,1136,
CK_84:531|b3251a1c-a1f3-4fe9-883d-7bcf8e73566d	464	0	464	TRINITY_DN4282_c0_g1_i1	1446	77	937	461	3	+	3	5,453,6,	0,5,458,	77,199,931,
CK_110:374|e27f0a65-6878-43e5-908e-c60c3e0f2921	264	0	264	TRINITY_DN3196_c0_g2_i5	2283	124	705	262	2	-	2	259,5,	0,259,	124,700,
CK_90:994|b230ef14-e16a-4b80-bef8-48a1bc6b03cb	913	0	911	TRINITY_DN5406_c0_g1_i3	3516	1664	2992	907	2	-	3	443,68,398,	2,445,515,	1664,2526,2594,
CK_95:2609|749a3bfd-18cb-4b60-bcfb-bf05a59711c3	2554	6	2554	TRINITY_DN2563_c0_g1_i5	2799	22	2745	2531	13	-	3	225,2310,9,	0,225,2539,	22,418,2736,
CK_103:965|bf2a0a09-f370-4d17-a6b8-c77c638e7f83	865	0	865	TRINITY_DN21610_c0_g1_i1	2717	176	1042	858	3	-	4	578,149,10,124,	0,579,728,741,	176,754,904,918,
CK_99:1062|2fc56b07-1bf1-4e44-80aa-9fde4fecb5ce	974	3	974	TRINITY_DN5303_c1_g1_i4	2071	7	1929	967	4	-	3	82,454,435,	0,82,536,	7,91,1494,
CK_105:1811|0917d5f9-4d91-4474-9d28-74b743b30e71	1691	3	1687	TRINITY_DN6799_c0_g1_i3	1802	46	1779	1684	0	+	3	7,838,839,	3,10,848,	46,54,940,
CK_97:1676|de4238fb-d69f-45ea-b81b-e1c966c16d1d	1621	0	1613	TRINITY_DN10138_c0_g1_i8	2391	17	1630	1611	2	-	1	1613,	8,	17,
CK_88:2008|ab514156-029d-4cb0-9900-aef383821d53	1932	0	1932	TRINITY_DN872_c1_g1_i1	2133	162	2097	1913	6	+	10	43,352,1090,207,33,9,19,89,64,13,	0,43,404,1494,1702,1735,1744,1763,1854,1919,	162,206,569,1660,1867,1901,1911,1931,2020,2084,
CK_101:834|d703d978-4055-4d99-9c90-e16d60c493ad	746	2	745	TRINITY_DN17618_c0_g1_i3	6824	5500	6274	742	1	+	2	558,185,	2,560,	5500,6089,
CK_102:3727|cd913309-b5de-4bf9-80cc-716bd693b949	3632	14	3628	TRINITY_DN4152_c0_g2_i1	4247	432	4179	3602	12	-	3	2765,445,404,	4,2769,3214,	432,3215,3775,
CK_81:409|ab0d8024-6254-46b3-b628-923a7f79b497	334	2	334	TRINITY_DN865_c0_g2_i1	1741	775	1618	331	1	-	2	304,28,	0,304,	775,1590,
CK_105:427|9d96476e-87cc-4454-9535-5f740aae062c	329	3	329	TRINITY_DN4146_c0_g1_i5	4027	3593	3953	326	0	-	2	37,289,	0,37,	3593,3664,
CK_92:340|f7b8b439-5e77-4848-9d24-063ec6b569d6	255	0	255	TRINITY_DN1869_c0_g1_i6	2092	54	549	254	0	-	4	6,74,69,105,	0,6,80,150,	54,297,375,444,
CK_102:1738|21a87451-c588-41b1-b6a0-9ca06262ad2b	1643	5	1641	TRINITY_DN5073_c0_g1_i2	2011	103	1940	1634	2	+	2	1368,268,	5,1373,	103,1672,
CK_94:766|3c22e5c1-9f74-4db9-87c8-34c3930ae825	671	2	670	TRINITY_DN31684_c0_g1_i5	4169	1954	2625	667	0	-	5	399,61,132,25,50,	1,401,462,594,619,	1954,2353,2416,2549,2575,
CK_104:702|a4932583-f6f3-489f-89bf-732737ab9bce	609	4	609	TRINITY_DN4483_c1_g1_i3	956	134	866	604	0	-	3	404,194,6,	0,404,599,	134,660,860,
CK_1215:1534|90062262-78b9-4f30-8d62-2a815d12911f	321	0	321	TRINITY_DN3337_c0_g2_i3	2187	990	1603	318	1	+	5	174,85,43,12,5,	0,174,259,304,316,	990,1186,1374,1417,1598,
CK_96:814|0e8f991a-81c2-44ac-96cf-7d80321ac960	715	1	715	TRINITY_DN383_c0_g1_i10	4709	1889	3311	714	0	-	2	152,562,	0,152,	1889,2749,
CK_106:370|e91ae348-0f6b-4303-b70d-98b79ca23b40	266	0	266	TRINITY_DN1938_c0_g2_i1	2400	1336	1661	264	2	-	2	5,261,	0,5,	1336,1400,
CK_88:3258|ba565c9e-ca78-4fd2-9a2f-a164893becf5	3174	3	3171	TRINITY_DN4152_c0_g2_i1	4247	272	4183	3161	7	-	2	1105,2063,	3,1108,	272,2120,
CK_91:2664|7e10148d-cd29-47fe-a289-51bb4fa3bf04	2582	0	2581	TRINITY_DN6727_c0_g1_i1	3005	137	2726	2567	10	-	6	1546,244,325,283,120,59,	1,1549,1794,2119,2402,2523,	137,1686,1934,2263,2547,2667,
CK_103:699|ea1f4cf7-6674-4775-b1c8-87b948caedad	607	2	606	TRINITY_DN33085_c0_g1_i1	758	131	735	601	3	-	1	604,	1,	131,
CK_103:2376|a8e61ac2-9562-4fb8-aae4-4e5657a27e9e	2305	0	2305	TRINITY_DN6340_c0_g1_i3	3324	189	3195	2295	2	+	3	1880,10,407,	0,1888,1898,	189,2076,2788,
CK_91:459|189a3de4-c540-4dbf-a142-b7b451d39547	367	0	367	TRINITY_DN46450_c0_g5_i1	1195	95	465	365	1	-	5	169,44,60,18,75,	0,169,214,274,292,	95,265,309,371,390,
CK_74:824|59807f5a-e6b6-4cfd-a583-a622d84900ec	745	1	745	TRINITY_DN6280_c0_g1_i1	2415	248	1947	743	1	-	2	106,638,	0,106,	248,1309,
CK_95:663|da57ee56-926c-4b23-a344-91b9a083a969	565	0	564	TRINITY_DN118_c0_g1_i2	2519	401	2417	562	2	+	2	414,150,	0,414,	401,2267,
CK_90:395|a2eebba2-17ef-435b-8b8c-82a4cd3e88d7	305	0	305	TRINITY_DN23245_c0_g2_i1	2102	1135	1442	302	0	+	5	97,41,30,16,118,	0,98,140,170,187,	1135,1232,1273,1304,1324,
CK_86:2299|2d3cafe9-93ca-4978-a553-bb72a2fdb3e5	2229	1	2229	TRINITY_DN70_c0_g1_i2	5353	2244	4617	2223	5	-	2	546,1682,	0,546,	2244,2935,
CK_102:434|5e4faeb8-14a4-4e6c-a7a5-9fc5bea616db	329	0	329	TRINITY_DN2160_c0_g1_i2	3381	181	510	327	2	-	1	329,	0,	181,
CK_102:2396|75e7cf42-7d93-412c-8690-b3f5268b2c34	2304	2	2304	TRINITY_DN13896_c0_g1_i2	2565	72	2537	2293	3	-	9	974,51,5,441,12,70,11,29,703,	0,974,1025,1030,1471,1484,1554,1568,1599,	72,1199,1251,1257,1700,1715,1786,1805,1834,
CK_88:472|95957a8c-0dcd-47dc-ae12-bd31e652914b	388	0	387	TRINITY_DN1111_c0_g2_i1	957	0	398	385	1	-	2	278,108,	1,280,	0,290,
CK_98:1786|2f74195c-c3b1-4aa6-9ce3-206eea8d6ef8	1695	0	1691	TRINITY_DN6137_c0_g1_i4	2740	287	1983	1681	10	+	5	177,876,517,48,73,	0,177,1053,1570,1618,	287,465,1343,1861,1910,
CK_97:435|207a8091-0492-4879-a654-cc52ad5adcd8	338	0	338	TRINITY_DN32138_c0_g1_i1	1975	95	436	335	2	+	5	31,4,133,27,142,	0,31,35,168,196,	95,127,132,267,294,
CK_90:908|1676605f-47f3-414c-90a0-4f86ebb4acb9	862	1	862	TRINITY_DN133_c1_g1_i1	1181	167	1166	855	6	+	3	495,357,9,	1,496,853,	167,753,1157,
CK_90:396|781b42fc-90e4-4774-9515-795585eaba89	308	0	308	TRINITY_DN162020_c0_g1_i1	362	37	345	305	1	-	4	41,46,79,140,	0,42,88,168,	37,78,126,205,
CK_107:2444|f5f8ec9b-1715-4740-b4ed-2058b131f808	2348	1	2339	TRINITY_DN58094_c0_g1_i2	3174	766	3150	2329	5	+	6	38,1979,41,66,54,156,	1,39,2019,2062,2129,2183,	766,851,2832,2873,2939,2994,
CK_97:972|3397bb16-6a5d-49ec-af66-9c662ff238e4	893	3	893	TRINITY_DN3800_c0_g1_i1	1103	8	1082	887	2	+	6	26,143,130,549,6,35,	3,29,172,302,852,858,	8,42,273,491,1040,1047,
CK_103:424|682a1487-9017-4d0e-8356-cf8c2bb258b9	317	0	317	TRINITY_DN6876_c0_g1_i4	1829	1443	1766	314	1	+	2	298,17,	0,300,	1443,1749,
CK_98:1744|2fc0ab1e-63d7-4982-880c-ddf6d796e52b	1671	2	1671	TRINITY_DN6609_c0_g1_i1	2072	140	1927	1664	5	-	2	1504,165,	0,1504,	140,1762,
CK_101:605|73e59f83-c76d-4b50-a9fb-031b09199032	507	0	507	TRINITY_DN4711_c1_g1_i7	4730	3429	3941	502	1	+	4	309,49,129,16,	0,309,358,491,	3429,3741,3791,3925,
CK_89:426|0d71c2d2-8443-465a-890f-0bec54e8ca2c	339	0	339	TRINITY_DN1356_c2_g1_i13	5017	144	4807	339	0	+	2	263,76,	0,263,	144,4731,
CK_98:2106|763927f2-2219-490e-8915-85566a30b0a9	2008	3	2007	TRINITY_DN2133_c0_g1_i8	2310	135	2284	1997	7	+	4	25,1935,16,28,	3,28,1963,1979,	135,302,2238,2256,
CK_93:370|37ab0889-19dd-4beb-aee5-d4d559f7d047	281	0	281	TRINITY_DN8439_c0_g1_i8	2212	48	742	279	2	-	5	9,14,43,210,5,	0,9,23,66,276,	48,187,203,314,737,
CK_95:2102|d8339a37-da70-4bd0-b938-a88492f176ac	2008	0	2005	TRINITY_DN4643_c1_g1_i1	2907	254	2734	1989	13	+	3	35,1859,108,	0,36,1897,	254,298,2626,
CK_107:2078|d91d28b3-a1af-4dd5-9a15-58e38d16c9e4	1991	0	1982	TRINITY_DN8414_c0_g1_i1	2179	103	2131	1974	3	-	4	465,4,1268,240,	9,474,478,1751,	103,570,575,1891,
CK_102:342|6ab316da-7c47-41d5-95cf-ac5c7f57254f	249	0	249	TRINITY_DN11986_c0_g1_i11	2173	1123	1373	248	1	+	2	237,12,	0,237,	1123,1361,
CK_86:793|74ec9d4c-ceaa-42ac-b935-43daaacbc91a	709	0	705	TRINITY_DN7368_c0_g1_i8	4123	294	2233	705	0	-	5	42,4,184,302,173,	4,46,50,234,536,	294,383,931,1666,2060,
CK_101:1375|c7d4b57a-7a95-4bff-a20d-5b4d2b7ba655	1285	1	1284	TRINITY_DN55444_c0_g1_i1	1805	183	1469	1281	2	-	2	772,511,	1,773,	183,958,
CK_103:2715|15a75fa9-5d81-4655-b52f-428ee6aeae04	2607	2	2605	TRINITY_DN2090_c0_g1_i2	3062	49	2971	2597	6	-	3	340,2119,144,	2,342,2461,	49,587,2827,
CK_110:1040|7b293f31-a2d8-41d5-97e6-36725450e8a9	925	3	922	TRINITY_DN12425_c0_g1_i1	1468	94	1341	918	1	+	2	506,413,	3,509,	94,928,
CK_118:2863|a928ac3d-3265-4473-9d61-1c1c3e9df855	2757	2	2757	TRINITY_DN6819_c0_g1_i3	3138	27	2787	2732	6	-	6	52,27,18,2390,38,213,	0,60,88,113,2503,2542,	27,89,116,144,2536,2574,
CK_102:1749|db3ec037-a8ba-4460-a825-54d543e4cc27	1645	2	1645	TRINITY_DN5410_c0_g1_i10	3276	177	2017	1640	3	+	3	1414,153,76,	2,1416,1569,	177,1783,1941,
CK_98:772|4ec9245f-6033-4752-a9da-7e71072ac7a6	684	0	683	TRINITY_DN7407_c1_g1_i4	2559	807	1926	682	1	-	3	268,8,407,	1,269,277,	807,1262,1519,
CK_92:5840|d0076b7b-7446-4acd-b78f-7cb0be98142c	5766	2	5758	TRINITY_DN1294_c0_g1_i7	5780	19	5780	5734	22	+	2	154,5602,	2,156,	19,178,
CK_94:807|a72b35b3-ff3f-48fe-839d-42d4b2f5c8c7	720	2	716	TRINITY_DN1636_c2_g1_i2	4232	1502	4182	714	0	+	2	581,133,	2,583,	1502,4049,
CK_101:1537|41ed961c-9d90-4cce-8ecc-fc7eed778fef	1440	2	1440	TRINITY_DN21594_c0_g2_i6	2093	443	1900	1428	5	-	8	147,565,141,64,61,38,38,379,	0,147,712,853,920,982,1021,1059,	443,592,1158,1300,1364,1425,1463,1521,
CK_99:1521|847a5cd8-0861-492e-9132-d8ffa4591bf3	1431	2	1430	TRINITY_DN8500_c0_g1_i9	4619	793	4409	1427	1	+	2	1345,83,	2,1347,	793,4326,
CK_93:2137|65e0b68f-c24c-423f-ace5-8fcc144e26a7	2055	0	2054	TRINITY_DN1400_c0_g1_i7	2463	205	2282	2036	13	+	3	825,802,422,	0,829,1632,	205,1058,1860,
CK_103:361|9ebe9b53-0a55-423a-bc96-c876145bb930	254	0	254	TRINITY_DN20811_c0_g1_i9	1010	386	640	253	1	-	1	254,	0,	386,
CK_103:1605|e3b4936f-c1ed-4f52-b654-c8c5aa441ceb	1495	1	1495	TRINITY_DN2405_c0_g2_i1	2419	909	2399	1485	5	+	2	1482,8,	1,1487,	909,2391,
CK_97:1384|c00bddcb-a68c-4429-8012-b6ba0a9c1b49	1293	0	1293	TRINITY_DN10710_c0_g1_i7	3231	1235	2578	1292	1	+	2	1288,5,	0,1288,	1235,2573,
CK_98:407|f5a74aad-6c3f-4b2b-ae7f-55bd6fe91c63	309	0	309	TRINITY_DN34614_c0_g1_i1	663	101	428	309	0	+	4	130,35,83,61,	0,130,165,248,	101,233,282,367,
CK_102:1537|7d486240-6e78-4d01-b777-e5fe1eb8ef45	1445	0	1445	TRINITY_DN4263_c0_g1_i1	2689	72	1789	1445	0	+	2	660,785,	0,660,	72,1004,
CK_113:1169|57ecb1ab-561f-4cef-9a62-51bb6314a67d	1064	1	1064	TRINITY_DN967_c0_g1_i4	5838	667	1731	1055	2	-	4	8,63,12,974,	0,8,76,89,	667,676,745,757,
CK_98:819|0fd73215-e901-48c3-a6d3-aaed6908ce6d	731	2	730	TRINITY_DN8531_c0_g1_i13	3012	2131	2984	724	4	-	2	388,340,	1,389,	2131,2644,
CK_110:847|6943138b-ffec-479b-bff2-6082a1dfc7d9	759	3	759	TRINITY_DN4195_c0_g2_i4	1435	18	774	755	1	+	1	756,	3,	18,
CK_79:1252|323e240a-9bd9-4dae-9554-3b5693ce3c90	1176	1	1176	TRINITY_DN1711_c0_g2_i4	1636	11	1542	1174	1	-	4	1133,5,28,9,	0,1133,1138,1166,	11,1152,1501,1533,
CK_98:1106|6e2b5764-f7ec-446b-9da2-02946891b227	1016	3	1016	TRINITY_DN40309_c0_g1_i3	1061	0	1022	1009	1	+	5	19,661,139,170,21,	3,22,686,825,995,	0,23,684,824,1001,
CK_95:1652|d4fc2339-f341-43c5-84b8-801784d02bc6	1578	0	1578	TRINITY_DN21469_c0_g1_i6	1607	1	1582	1573	4	+	2	1306,271,	0,1307,	1,1311,
CK_86:1031|0c953836-49d7-4f42-a733-229bb21984de	955	0	951	TRINITY_DN5531_c0_g1_i5	2194	84	1036	949	2	+	2	900,51,	0,900,	84,985,
CK_102:753|0a0efcb5-77e8-491a-817e-33e3aa20b076	663	3	663	TRINITY_DN7136_c0_g1_i1	4407	3622	4282	660	0	-	1	660,	0,	3622,
CK_93:830|88efe3e7-5591-4f59-92ec-ec64299200ac	734	0	734	TRINITY_DN3388_c0_g1_i1	911	42	900	730	2	+	2	341,391,	0,343,	42,509,
CK_98:1403|759b5e9d-8e70-4b6f-af72-5e8fc058811d	1301	0	1301	TRINITY_DN574_c0_g2_i1	3501	619	2438	1292	9	+	2	96,1205,	0,96,	619,1233,
CK_94:567|563d6ddc-8513-41ac-8a26-d5d0f4db3d68	477	1	476	TRINITY_DN7736_c0_g1_i1	1416	506	1377	474	1	+	2	112,363,	1,113,	506,1014,
CK_90:934|ef3020df-e528-4f2f-9985-2c4d6bffb981	844	0	844	TRINITY_DN10126_c1_g1_i1	1061	94	940	836	4	+	5	252,55,203,113,217,	0,252,309,512,627,	94,347,405,610,723,
CK_92:1003|46ed740a-981e-400a-81cc-431a38b4823f	921	0	921	TRINITY_DN18534_c2_g1_i1	1293	267	1287	915	6	-	2	5,916,	0,5,	267,371,
CK_91:892|69117697-07b4-401a-9556-3f145cf21878	800	0	798	TRINITY_DN3067_c0_g1_i2	1344	0	920	794	4	+	2	98,700,	0,98,	0,220,
CK_94:906|cf9da607-8b75-439a-aecd-981c2a014ed1	818	0	815	TRINITY_DN31869_c0_g1_i1	969	50	871	810	5	+	6	42,390,19,34,264,66,	0,42,432,451,485,749,	50,93,484,505,540,805,
CK_87:343|53914b2d-a173-498d-80b2-e6351a7a3090	256	0	256	TRINITY_DN23046_c1_g1_i1	2634	1284	1541	255	0	-	4	89,123,30,13,	0,90,213,243,	1284,1373,1497,1528,
CK_101:461|0af0d928-413e-485f-b948-eddc8faa3ee9	363	0	363	TRINITY_DN550_c3_g1_i4	1317	887	1265	361	2	+	2	338,25,	0,338,	887,1240,
CK_102:449|66c47094-ebfe-479b-ace4-c56013895f8f	348	0	348	TRINITY_DN8048_c1_g3_i1	825	155	506	347	0	-	5	8,22,10,26,281,	0,8,31,41,67,	155,164,186,197,225,
CK_94:1715|f2c9fbff-aad8-4dfd-84c4-5444ee13ce39	1610	0	1609	TRINITY_DN1605_c0_g1_i3	2201	18	1628	1598	11	+	2	9,1600,	0,9,	18,28,
CK_99:1808|ade766f1-4456-4cfc-8012-65c7269e33e5	1725	0	1724	TRINITY_DN2044_c1_g1_i7	2128	161	1890	1718	5	-	4	25,12,130,1556,	1,26,39,169,	161,187,203,334,
CK_104:2141|77811038-ff8b-4529-a0a1-7b6affd3ec5f	2067	3	2063	TRINITY_DN659_c0_g1_i4	2265	48	2214	2049	11	-	2	711,1349,	4,715,	48,865,
CK_89:1605|e51ca8f4-61e1-4fa0-b03a-27148f8b622c	1586	0	1580	TRINITY_DN8530_c1_g1_i2	2038	218	1838	1574	5	+	5	9,4,1489,12,65,	0,9,13,1503,1515,	218,229,262,1760,1773,
CK_96:523|111028c7-eb96-4a04-b045-164575ffe1c2	433	2	433	TRINITY_DN16319_c0_g4_i1	3980	1906	2439	431	0	-	3	7,78,346,	0,7,85,	1906,2013,2093,
CK_88:662|476eebc2-7954-4d11-aa13-dc72baf0fb0f	575	0	575	TRINITY_DN1185_c0_g2_i1	686	7	615	574	1	-	4	21,18,7,529,	0,21,39,46,	7,51,74,86,
CK_93:650|dea2c654-8480-4e99-99c0-e3e413fac368	566	0	566	TRINITY_DN1764_c0_g3_i1	783	95	686	561	4	-	4	5,14,23,523,	0,5,19,43,	95,120,135,163,
CK_98:572|18fd8c7c-5009-48c5-8224-f23055ac92e8	476	0	476	TRINITY_DN65848_c0_g2_i1	856	177	762	472	4	+	2	471,5,	0,471,	177,757,
CK_93:467|d2892705-c9e8-4bd9-a7cd-366c8ae83fc5	378	0	378	TRINITY_DN8375_c0_g1_i1	2005	0	1985	377	0	-	4	6,87,270,14,	0,6,93,364,	0,365,1679,1971,
CK_100:1224|f028f8b3-8360-413b-bc0f-da75c79d006e	1130	3	1127	TRINITY_DN14506_c0_g1_i1	1301	43	1262	1124	0	-	3	81,588,455,	3,84,672,	43,125,807,
CK_99:919|717bbf4d-4eea-409a-86bd-3e75ffccfdf3	826	1	825	TRINITY_DN779_c0_g1_i10	1775	458	1429	822	1	-	4	152,14,495,162,	1,154,168,663,	458,610,681,1267,
CK_92:1787|76de2d60-686f-4a5c-84b9-01dde6fb38f6	1717	0	1717	TRINITY_DN1765_c0_g1_i18	2617	94	2183	1706	2	-	9	537,98,19,6,19,28,66,696,239,	0,537,637,656,662,683,716,782,1478,	94,787,885,905,912,935,964,1034,1944,
CK_105:936|19add242-6f7b-4b9a-a107-2c5e0acfa910	872	2	870	TRINITY_DN1293_c0_g2_i1	2377	1	870	865	3	+	2	68,800,	2,70,	1,70,
CK_104:1063|dbeb8a37-6f64-418e-a13c-e411674302b4	968	0	968	TRINITY_DN9425_c0_g2_i2	3718	165	1138	967	1	-	2	5,963,	0,5,	165,175,
CK_99:2650|9d2adc80-fcec-4283-8c15-ed6d600ae0af	2574	10	2572	TRINITY_DN12349_c1_g1_i6	2824	55	2620	2552	9	+	4	15,1727,439,380,	10,25,1752,2192,	55,72,1801,2240,
CK_92:508|da334856-b68a-4926-bc5e-c66cb3ec8c88	418	0	418	TRINITY_DN2564_c0_g2_i1	800	241	791	416	2	+	3	15,398,5,	0,15,413,	241,387,786,
CK_2970:3392|d2faaa03-b944-4bf3-83c0-e09fe28c89f1	422	0	422	TRINITY_DN19700_c0_g2_i1	1176	166	598	419	2	+	8	56,15,84,52,48,11,40,115,	0,57,72,156,208,256,267,307,	166,222,239,324,380,429,442,483,
CK_103:3638|1fa09154-78ff-40fa-b1e3-9b3271c26931	3531	3	3531	TRINITY_DN60369_c0_g1_i10	3744	75	3605	3518	10	-	2	234,3294,	0,234,	75,311,
CK_95:3676|ca13f446-75c6-428c-bae8-fb0eb2100401	3658	0	3658	TRINITY_DN2339_c4_g1_i1	3802	29	3701	3641	3	-	4	62,20,3497,65,	0,62,96,3593,	29,93,138,3636,
CK_89:818|30552570-6929-4b7c-85ff-240a537aadbb	733	0	733	TRINITY_DN13558_c1_g1_i3	2019	5	1833	729	4	-	2	200,533,	0,200,	5,1300,
CK_88:2313|f6eda6c9-d3df-4445-8f23-52c55e1fad10	2230	0	2228	TRINITY_DN1025_c0_g1_i13	4026	20	2428	2212	9	+	8	33,23,1037,68,196,47,738,79,	0,34,62,1099,1167,1364,1411,2149,	20,55,82,1120,1189,1385,1433,2349,
CK_87:553|f22ccd1a-c18c-4d43-bbb7-ca34ddc6f71e	475	3	474	TRINITY_DN20871_c0_g1_i12	2391	1645	2205	471	0	+	3	41,420,10,	3,44,464,	1645,1774,2195,
CK_87:533|36c16398-827d-4351-868f-323bb7455475	458	0	455	TRINITY_DN1388_c0_g1_i1	4933	1910	2623	455	0	-	2	406,49,	3,409,	1910,2574,
CK_98:2222|ad515e23-fca7-4d99-b6ef-9f56cc0468e1	2135	11	2131	TRINITY_DN1891_c0_g2_i1	2584	8	2584	2120	0	-	3	1480,629,11,	4,1484,2113,	8,1943,2573,
CK_111:1277|8e1d2465-1fa4-4adc-961c-93f18c75d4a7	1170	3	1170	TRINITY_DN4530_c0_g1_i6	1923	20	1906	1159	1	-	5	356,122,528,139,15,	0,356,478,1006,1152,	20,459,1202,1746,1891,
CK_100:1385|90ad50a5-f57b-4623-b3ac-9313ad2f93c1	1295	0	1291	TRINITY_DN9053_c1_g1_i3	2847	9	1334	1283	1	-	3	17,680,587,	4,21,708,	9,27,747,
CK_96:1142|e498dcc9-37ad-4344-a4b5-b8e2c8d27a22	1057	1	1053	TRINITY_DN3376_c0_g1_i17	1579	308	1362	1049	0	-	3	74,56,919,	4,80,137,	308,387,443,
CK_92:792|ca565506-405c-4926-94a8-70efa1f62be1	705	1	705	TRINITY_DN15429_c0_g1_i8	2172	197	1732	700	3	-	4	629,2,21,51,	0,630,632,653,	197,826,1625,1681,
CK_92:1109|305b1b6b-850b-451d-9deb-57e81140b0f5	1019	0	1017	TRINITY_DN12187_c0_g1_i6	1280	90	1232	1011	5	-	2	998,18,	2,1001,	90,1214,
CK_105:1584|502a317d-7527-4f56-98a7-e5768b0be298	1468	4	1468	TRINITY_DN3884_c0_g1_i13	1668	74	1538	1454	10	+	1	1464,	4,	74,
CK_109:379|8d1862c7-df39-4bdd-825b-aa04e11e2fe6	270	0	270	TRINITY_DN18035_c0_g1_i1	2185	1027	1303	269	1	+	5	6,135,92,31,6,	0,6,141,233,264,	1027,1034,1170,1265,1297,
CK_83:1511|53d9565a-a30b-4301-9e82-94778ff0bc5f	1442	4	1438	TRINITY_DN20299_c0_g2_i1	3091	1247	2849	1431	3	-	3	1341,77,16,	4,1345,1422,	1247,2754,2833,
CK_95:616|bcc907bd-ebda-4f4a-887d-f566e29b81b0	533	0	533	TRINITY_DN26664_c0_g1_i6	1524	364	1198	529	4	+	2	527,6,	0,527,	364,1192,
CK_101:1518|a3ed470a-ab52-4533-a2ac-905633610bb2	1430	3	1427	TRINITY_DN14530_c1_g1_i3	1930	365	1795	1421	3	-	5	477,33,860,31,23,	3,480,513,1373,1404,	365,843,877,1740,1772,
CK_105:423|221f01cd-8337-4395-ad87-f85f4a3b7a69	318	0	318	TRINITY_DN98916_c0_g1_i1	440	28	346	315	1	-	4	25,126,10,155,	0,27,153,163,	28,53,180,191,
CK_89:383|089ba6e2-c5e5-431c-865c-74d08773c60f	295	0	295	TRINITY_DN36015_c0_g1_i1	1758	941	1726	295	0	+	2	6,289,	0,6,	941,1437,
CK_101:1474|3f55090c-b380-4d86-81b9-1cbff83236b5	1374	2	1373	TRINITY_DN11374_c0_g1_i1	1456	50	1423	1365	6	-	2	43,1328,	1,44,	50,95,
CK_101:379|a0bddfac-5940-4121-b853-309d8aa70012	282	0	282	TRINITY_DN1050_c0_g1_i4	1926	14	331	280	1	-	5	6,19,22,4,230,	0,6,25,47,52,	14,53,74,97,101,
CK_112:366|6064d909-ce95-4097-aca2-5131506d847f	251	1	250	TRINITY_DN11986_c0_g1_i11	2173	987	1382	249	0	+	2	236,13,	1,237,	987,1369,
CK_100:4205|75369c63-f6e4-4b80-9ca7-abd2a6108bbb	4121	2	4120	TRINITY_DN5791_c0_g2_i6	5228	608	4719	4086	10	+	15	94,17,28,23,12,11,1527,13,44,1436,37,38,51,334,431,	2,97,116,144,171,183,194,1721,1736,1781,3217,3263,3301,3352,3689,	608,702,720,749,772,785,797,2325,2338,2382,3819,3861,3901,3953,4288,
CK_102:1432|c6454e84-4243-4c0f-8696-f1b129dd39ae	1339	0	1338	TRINITY_DN4596_c0_g1_i1	3361	884	2591	1330	8	+	2	1281,57,	0,1281,	884,2534,
CK_90:1617|10e7119b-615d-4dd0-902a-9c382b965b16	1530	0	1526	TRINITY_DN10956_c0_g1_i3	3304	51	1577	1525	1	+	1	1526,	0,	51,
CK_91:1399|0ee59789-9509-4adb-b8d0-7d433d671fcb	1311	0	1307	TRINITY_DN3094_c0_g1_i2	1569	27	1417	1298	3	-	3	479,164,658,	4,489,653,	27,580,759,
CK_107:379|c0d12e98-e6ee-4878-b93f-b7e696407f9a	272	0	272	TRINITY_DN1833_c0_g1_i5	2445	0	388	270	2	-	2	7,265,	0,7,	0,123,
CK_90:694|27f9ee39-8f8f-418a-85f3-1cdb9cc6c61a	597	0	592	TRINITY_DN7601_c0_g1_i1	1232	196	1175	592	0	-	2	289,303,	5,294,	196,872,
CK_113:1911|66372dfa-f904-4140-ab24-cfbca549c9d7	1833	1	1833	TRINITY_DN4369_c1_g1_i3	4721	85	2896	1827	5	-	3	400,1352,80,	0,400,1752,	85,486,2816,
CK_97:1048|770dcf17-ecde-4400-9817-ed5dec33668e	950	0	943	TRINITY_DN10258_c2_g1_i2	1355	343	1355	941	2	+	2	133,810,	0,133,	343,545,
CK_101:655|421d2500-e000-4eca-a430-033942330460	557	1	557	TRINITY_DN5520_c1_g1_i1	888	38	591	553	0	-	3	4,82,467,	0,5,89,	38,42,124,
CK_97:745|a7f8432e-79cf-4870-9761-514818291f48	650	3	650	TRINITY_DN30348_c0_g1_i7	930	64	725	644	2	+	3	625,13,8,	3,628,642,	64,704,717,
CK_89:622|c05bafc2-70c8-494b-99a5-d595a4124741	543	0	539	TRINITY_DN921_c0_g1_i10	1380	832	1375	538	1	-	4	90,77,256,116,	4,94,171,427,	832,924,1002,1259,
CK_102:1671|d9132239-d731-4d7b-858e-7612acba64ae	1579	0	1573	TRINITY_DN2073_c2_g1_i4	1915	9	1577	1566	2	+	3	465,1096,7,	0,466,1566,	9,474,1570,
CK_102:706|8cb66e8c-7426-4b63-8d0a-d0aa4ab11c56	606	3	606	TRINITY_DN9827_c0_g1_i1	1734	138	839	601	1	+	3	262,332,8,	3,266,598,	138,463,831,
CK_90:1233|32f9aaec-680c-4622-b170-adb020f50bdd	1147	0	1147	TRINITY_DN5100_c3_g1_i4	4303	1385	2669	1136	11	-	2	493,654,	0,493,	1385,2015,
CK_97:1484|50f0d9fe-4d18-4ea1-a881-17a6f182aca5	1400	5	1396	TRINITY_DN2450_c0_g1_i1	1710	8	1506	1391	0	-	2	1124,267,	4,1128,	8,1239,
CK_89:403|46e2d815-16c8-4c9f-aa8f-1556df28b15a	314	0	313	TRINITY_DN27982_c0_g1_i1	599	279	595	312	0	-	5	36,10,3,199,64,	1,38,48,51,250,	279,315,327,331,531,
CK_102:616|25fc97fa-3142-484d-85d6-26206dfa7ffa	520	3	520	TRINITY_DN2814_c2_g3_i2	679	48	621	515	2	-	3	5,504,8,	0,5,509,	48,108,613,
CK_108:1444|4f96b2b4-e7ba-4294-9c18-a79570ada97d	1368	0	1365	TRINITY_DN2962_c0_g1_i2	1508	0	1365	1356	3	-	2	39,1320,	3,48,	0,45,
CK_90:392|a2394c0b-f103-4afe-8884-1607c82504ce	309	0	309	TRINITY_DN8_c5_g1_i1	1086	639	1028	306	3	+	2	6,303,	0,6,	639,725,
CK_103:2912|87218fc6-af61-4dc4-bb46-e3bfeb66ebc8	2845	2	2844	TRINITY_DN4346_c1_g1_i4	5648	2734	5605	2839	1	+	3	581,2233,26,	2,583,2818,	2734,3346,5579,
CK_93:3504|f426e911-9f33-4ba0-95b8-8e8e1c84fe83	3449	12	3445	TRINITY_DN1388_c0_g1_i1	4933	162	4933	3432	1	-	3	1195,760,1478,	4,1199,1959,	162,2599,3455,
CK_89:771|da744d4e-c05b-4472-98cc-3cdf3b6ed305	688	3	688	TRINITY_DN4957_c3_g1_i1	830	94	828	683	2	+	2	676,9,	3,679,	94,819,
CK_88:1904|10c5b558-c0ac-4cdd-ad02-4507364e64f2	1828	0	1823	TRINITY_DN3145_c1_g1_i1	3676	14	1843	1819	4	+	3	37,265,1521,	0,37,302,	14,52,322,
CK_87:312|e8707cb9-10a8-4421-a377-4c26503bc553	231	0	231	TRINITY_DN1472_c2_g2_i2	2167	3	239	229	1	-	2	6,224,	0,7,	3,15,
CK_102:517|186ff5d4-7ef3-4c40-832f-6cbf15552da6	417	0	416	TRINITY_DN44043_c1_g1_i1	649	143	559	413	3	-	1	416,	1,	143,
CK_92:1758|a14af1fb-1f3e-4839-8e2e-4e318faaaea6	1666	0	1662	TRINITY_DN5948_c0_g1_i4	3617	1809	3566	1654	5	+	9	603,520,166,9,19,6,142,15,179,	0,603,1123,1289,1299,1318,1324,1468,1483,	1809,2486,3025,3192,3201,3221,3228,3370,3387,
CK_98:2250|5c05321c-cdf8-4113-b8b3-acddeef78080	2153	6	2151	TRINITY_DN10400_c0_g1_i1	2510	65	2210	2140	5	+	1	2145,	6,	65,
CK_89:863|59999889-5901-4609-b3b0-6cc43db5f0d4	773	0	773	TRINITY_DN10983_c0_g1_i1	3689	2744	3673	773	0	-	2	399,374,	0,399,	2744,3299,
CK_91:1917|7de450f6-6102-46e3-a290-dc9f5c467298	1825	0	1825	TRINITY_DN4405_c2_g2_i4	2922	9	1840	1808	12	+	7	133,65,17,90,289,1060,166,	0,134,201,218,308,597,1659,	9,144,212,231,323,614,1674,
CK_109:1353|29f5c914-2d27-4a0c-a890-d57451337145	1251	0	1244	TRINITY_DN4775_c0_g1_i7	5040	84	2950	1242	2	-	4	9,25,817,393,	7,16,41,858,	84,94,123,2557,
CK_102:1305|b9015f97-5ccc-4d9c-bc53-97ea5966270f	1189	0	1182	TRINITY_DN4982_c0_g1_i1	1800	182	1525	1180	2	-	2	501,681,	7,508,	182,844,
CK_82:2369|647561cc-c412-40cd-84bd-4388c1177ca4	2329	0	2329	TRINITY_DN1131_c1_g1_i2	2806	127	2782	2321	7	-	4	122,1185,264,757,	0,123,1308,1572,	127,249,1639,2025,
CK_92:3263|8ab4191b-6ac1-43ca-b385-73ca1f368030	3229	1	3221	TRINITY_DN4066_c0_g1_i1	3773	0	3759	3210	9	+	5	86,385,449,1391,908,	1,88,473,922,2313,	0,89,903,1354,2851,
CK_94:902|34c176b2-e591-4d41-8f3b-98d4b40b213e	809	2	809	TRINITY_DN13798_c0_g1_i20	1799	3	1014	804	3	+	5	50,6,37,141,573,	2,52,58,95,236,	3,54,64,102,441,
CK_80:2067|099a07ce-2051-4d57-94cb-bbb109043dea	2081	7	2075	TRINITY_DN26398_c0_g2_i6	2630	137	2571	2061	1	-	4	322,10,1214,516,	6,328,344,1558,	137,581,598,2055,
CK_94:478|c8731b95-d607-4ce7-b7ca-8157031f59ed	387	0	387	TRINITY_DN4340_c0_g1_i3	1509	373	1223	384	3	+	2	379,8,	0,379,	373,1215,
CK_95:2308|539a8ee8-0b70-4378-8f70-b15cece3f6d3	2237	0	2233	TRINITY_DN605_c0_g1_i8	2371	124	2355	2217	8	+	4	1333,866,10,16,	0,1335,2202,2217,	124,1457,2323,2339,
CK_84:393|a759d2ae-729d-427f-a7d6-de947dabd478	311	0	309	TRINITY_DN4738_c0_g3_i2	1395	140	1297	308	0	-	3	269,17,22,	2,271,289,	140,1258,1275,
CK_82:2149|dbc1164a-7995-44f5-8ed0-584a1b44c0a1	2104	5	2091	TRINITY_DN9053_c1_g1_i3	2847	9	2151	2084	1	-	4	16,5,346,1718,	13,30,35,381,	9,25,31,433,
CK_104:363|f8c720d5-9d11-4d5b-8175-6a5f1037d210	262	0	262	TRINITY_DN4203_c0_g1_i3	3326	2753	3274	261	0	+	4	157,4,94,6,	0,157,162,256,	2753,2911,2915,3268,
CK_88:299|b991561b-0a22-44c3-bd33-8173c4596cd9	211	0	211	TRINITY_DN21369_c0_g1_i1	921	232	446	211	0	+	4	55,20,40,96,	0,55,75,115,	232,288,309,350,
CK_103:501|691e22f8-9070-4e82-8b71-f78bec220dc2	401	0	401	TRINITY_DN9996_c0_g1_i4	2018	683	1429	399	2	-	2	222,179,	0,222,	683,1250,
CK_90:539|4a667c8b-55d9-44c7-b7b3-ace5e13f6d45	453	0	453	TRINITY_DN6759_c0_g1_i1	1244	100	1194	451	1	-	3	300,4,148,	0,300,305,	100,1040,1046,
CK_105:778|9130f204-934e-4b2c-9ef3-161b0e77cdc8	677	3	677	TRINITY_DN1339_c3_g1_i2	1812	0	1682	671	3	-	3	6,90,578,	0,6,96,	0,248,1104,
CK_104:1574|2c5fe8b8-dfb9-402e-b782-b73d7bb467a5	1485	4	1485	TRINITY_DN11092_c0_g1_i1	2784	83	2125	1475	2	+	5	15,5,1316,12,129,	4,21,26,1342,1356,	83,98,104,1984,1996,
CK_91:2785|8e62a4da-b6a2-49e9-b37d-3c32ee641acf	2712	0	2711	TRINITY_DN3072_c0_g3_i3	2839	92	2803	2705	6	+	1	2711,	0,	92,
CK_94:740|ceb2b85c-e76d-42cd-81fd-8acb098a22b2	646	0	646	TRINITY_DN5607_c0_g2_i1	1502	760	1409	641	5	+	3	231,88,327,	0,231,319,	760,993,1082,
CK_98:541|e8ddc52a-c06f-4ba0-afdf-174e9f1d09d5	445	1	445	TRINITY_DN4754_c0_g1_i2	1143	505	1084	443	1	-	2	292,152,	0,292,	505,932,
CK_90:554|c9c69ec3-105c-4a2d-aed2-629beeb5b428	469	0	469	TRINITY_DN3345_c3_g1_i1	1077	234	1052	465	3	+	4	33,347,82,6,	0,34,381,463,	234,267,615,1046,
CK_106:1971|73d9edb8-110c-4eef-8e50-d10fd0464295	1903	3	1903	TRINITY_DN1497_c0_g1_i4	5059	639	4975	1886	14	-	3	1450,306,144,	0,1450,1756,	639,2158,4831,
CK_99:931|fc8b0886-1f83-4beb-bf46-0ab9379e4412	844	0	843	TRINITY_DN5609_c0_g1_i3	3237	329	1220	842	1	+	3	24,313,506,	0,24,337,	329,398,714,
CK_100:350|0904f703-21bf-4ba1-b340-2d70b2ecb926	252	0	252	TRINITY_DN34294_c0_g1_i1	2133	1586	2113	251	1	+	2	246,6,	0,246,	1586,2107,
CK_101:1238|7007eda9-b610-489e-b65c-d4ac0bd8b655	1153	4	1153	TRINITY_DN32504_c0_g1_i2	1740	62	1688	1147	2	+	3	901,104,144,	4,905,1009,	62,1432,1544,
CK_101:513|aaede268-5e61-4773-9e53-4c31946dc56d	414	0	414	TRINITY_DN86669_c2_g1_i1	753	250	666	412	2	-	3	123,70,221,	0,123,193,	250,374,445,
CK_91:510|f28fc218-e312-4d73-a358-9331eb9cfca5	422	0	422	TRINITY_DN35917_c0_g1_i6	7683	3882	4306	418	4	-	2	384,38,	0,384,	3882,4268,
CK_87:2985|e6109573-235c-4bcd-8f4a-837fd951980d	2925	0	2917	TRINITY_DN6135_c0_g2_i4	3777	130	3279	2915	2	+	4	768,1784,25,340,	0,768,2552,2577,	130,1128,2913,2939,
CK_92:1425|fa7bc6e2-4ee0-4e54-bd10-bd4ccf792112	1345	0	1345	TRINITY_DN103_c1_g1_i23	2140	579	1925	1344	1	-	2	549,796,	0,549,	579,1129,
CK_100:354|d2a97490-ccc6-458d-a324-20f094954470	254	0	254	TRINITY_DN16027_c0_g1_i1	1716	1222	1476	254	0	-	1	254,	0,	1222,
CK_96:1169|5b091f47-bae9-4c7e-a503-bab5e126b47c	1074	0	1074	TRINITY_DN39914_c0_g3_i3	3047	1748	3021	1064	2	+	5	220,218,191,432,5,	0,220,445,637,1069,	1748,1969,2193,2384,3016,
CK_98:2135|6bd025c2-8519-409b-9ded-5e71443d1937	2068	0	2068	TRINITY_DN3878_c4_g1_i2	2419	313	2381	2066	2	-	1	2068,	0,	313,
CK_97:486|af285a62-9afd-4110-b4e3-815fe379a7c1	390	0	390	TRINITY_DN60231_c0_g1_i1	846	28	421	387	1	-	6	86,35,37,115,5,110,	0,86,122,160,275,280,	28,115,150,187,305,311,
CK_95:623|f1a77425-cac2-419b-a611-ea5039af0ce2	546	0	546	TRINITY_DN13579_c1_g1_i4	2042	1	875	541	5	-	3	141,5,400,	0,141,146,	1,185,475,
CK_94:865|e7153541-a1fa-4f03-a6d7-d55f78594f2d	768	0	768	TRINITY_DN2216_c4_g1_i4	2150	961	1730	761	7	+	2	99,669,	0,99,	961,1061,
CK_60:1029|7d5215d9-6480-4124-83bf-e12e6924a227	978	1	978	TRINITY_DN21889_c0_g1_i1	1219	5	1207	976	1	+	2	963,14,	1,964,	5,1193,
CK_89:1997|e002c5c5-2c23-438f-9507-d79011d30cd2	1924	6	1918	TRINITY_DN8219_c0_g1_i7	2141	21	1933	1907	5	+	1	1912,	6,	21,
CK_88:554|421624a6-c55b-460e-8242-66ce8799440e	475	0	474	TRINITY_DN3826_c0_g1_i1	1949	940	1647	472	2	-	3	43,130,301,	1,44,174,	940,1087,1346,
CK_90:715|b64958f4-4ffb-4822-b1fb-96058347da68	614	2	614	TRINITY_DN27062_c0_g1_i1	2382	154	909	612	0	+	2	425,187,	2,427,	154,722,
CK_89:3842|662ab8b6-1b6e-4929-a273-6932cfff0340	3795	3	3791	TRINITY_DN8812_c0_g2_i2	3898	100	3887	3786	1	-	2	3736,51,	4,3741,	100,3836,
CK_100:497|6db5db37-31c6-453e-931c-3f5d9c933b69	400	0	399	TRINITY_DN3050_c0_g1_i28	6598	4880	5529	399	0	-	2	123,276,	1,124,	4880,5253,
CK_102:750|d1a6ad66-526e-46b7-aaae-5110110ef1c4	654	1	650	TRINITY_DN9451_c0_g1_i2	3514	291	3443	649	0	+	2	606,43,	1,607,	291,3400,
CK_97:3760|f93d8602-b9f6-4fbb-9b06-49ac32bb119c	3655	0	3655	TRINITY_DN21724_c0_g2_i14	6456	409	4161	3633	13	-	12	1121,238,9,71,7,398,27,553,25,1123,37,37,	0,1121,1360,1369,1441,1448,1846,1873,2430,2458,3581,3618,	409,1532,1770,1780,1851,1944,2348,2381,2935,2962,4086,4124,
CK_107:1414|16d45b2f-32c3-4126-96b8-f9a96a183570	1315	0	1315	TRINITY_DN4152_c0_g2_i1	4247	2577	4188	1307	4	-	3	6,940,365,	0,6,950,	2577,2850,3823,
CK_106:2559|3c5107a4-cc6b-4c36-ac35-1bf439e4ef80	2481	4	2477	TRINITY_DN2079_c0_g1_i6	2908	28	2501	2472	1	+	1	2473,	4,	28,
CK_98:1081|f07fd3ba-eb28-46cb-8f5a-ac2d57a206b2	986	0	986	TRINITY_DN12435_c4_g1_i1	1719	268	1258	979	5	+	5	465,34,270,202,13,	0,466,500,770,973,	268,733,769,1040,1245,
CK_93:1793|b8b365c0-e5da-4b48-8da0-fd12cd78b1af	1704	0	1699	TRINITY_DN48691_c1_g1_i1	1934	120	1819	1699	0	-	1	1699,	5,	120,
CK_107:642|79686284-f49d-4c7d-a6c4-c5e553c9049b	536	0	536	TRINITY_DN5671_c0_g1_i1	1214	20	559	532	2	-	4	36,31,27,440,	0,37,69,96,	20,58,91,119,
CK_108:2399|00024a84-8b41-4653-b156-5502d76baf6a	2301	3	2300	TRINITY_DN831_c0_g2_i3	3571	924	3420	2283	10	+	3	77,1025,1191,	3,84,1109,	924,1006,2229,
CK_83:1315|03b61c96-2623-44b9-9235-c0964f07aed6	1266	4	1265	TRINITY_DN6_c0_g1_i18	4048	535	2163	1260	1	+	3	75,12,1174,	4,79,91,	535,613,989,
CK_95:1466|473f98f7-0038-4b42-a5af-fd19730094dd	1368	0	1368	TRINITY_DN16964_c0_g1_i7	2163	20	2123	1360	5	+	6	442,186,500,209,23,5,	0,442,628,1129,1340,1363,	20,965,1353,1866,2075,2118,
CK_92:1937|529a34f5-1445-47ea-ad6d-ef009d595855	1862	1	1862	TRINITY_DN6567_c0_g1_i3	4749	24	2533	1856	3	+	2	80,1779,	1,83,	24,754,
CK_91:1308|15f46060-f1b1-4b8a-b710-62cf51711f8d	1217	0	1216	TRINITY_DN4993_c1_g1_i9	2172	313	1800	1216	0	-	2	64,1152,	1,65,	313,648,
CK_101:2918|f72f73dd-b5fb-496e-8b93-ae354f7a1fbe	2855	11	2852	TRINITY_DN4066_c0_g1_i1	3773	0	3740	2832	6	+	8	14,29,22,145,333,6,1400,889,	11,25,57,79,224,557,563,1963,	0,15,44,79,1004,1338,1345,2851,
CK_99:1232|598dc07f-34d3-4669-857f-0c103a96d63e	1127	1	1127	TRINITY_DN863_c0_g1_i11	3727	132	1392	1124	2	+	2	225,901,	1,226,	132,491,
CK_99:963|d7919378-b011-4b00-ae0d-b2a3474e7edd	876	4	876	TRINITY_DN5271_c0_g1_i1	2156	1182	2054	872	0	-	1	872,	0,	1182,
CK_95:1565|ee705569-bd6f-4df6-a5d4-4d072c1c3a49	1477	1	1471	TRINITY_DN7064_c0_g1_i1	1881	73	1828	1464	2	-	4	10,18,468,970,	6,20,38,506,	73,86,313,858,
CK_105:1244|ba8a7580-1d31-425f-b3ae-8088f28a907e	1130	3	1125	TRINITY_DN3213_c3_g1_i1	1452	221	1343	1119	3	-	1	1122,	5,	221,
CK_99:3646|1471121c-f63a-4dc2-83cb-6ede0f8b6175	3552	0	3552	TRINITY_DN9321_c0_g1_i5	3789	227	3785	3529	23	+	5	1671,61,80,15,1725,	0,1671,1732,1812,1827,	227,1899,1963,2044,2060,
CK_89:3790|fa27549a-6cd8-4181-a191-c13d471d2af7	3715	0	3707	TRINITY_DN283_c0_g1_i10	5212	151	4011	3679	24	-	7	74,45,84,53,140,306,3001,	8,86,131,215,268,408,714,	151,231,278,363,444,702,1010,
CK_115:624|365e5e6e-4a36-4c17-bf43-279b40b9e24c	523	2	522	TRINITY_DN319_c0_g1_i6	2315	26	2127	520	0	-	4	58,11,114,337,	1,59,70,184,	26,88,1537,1790,
CK_104:419|c7000b48-469b-408e-a790-d989368f5db6	316	0	315	TRINITY_DN5056_c0_g1_i1	1917	1544	1906	314	0	+	5	5,228,11,43,27,	0,5,233,245,288,	1544,1594,1824,1835,1879,
CK_108:502|370bc00c-cb91-487f-980e-9a2fd538740b	395	0	395	TRINITY_DN12778_c0_g1_i3	2568	176	569	392	1	-	3	7,19,367,	0,8,28,	176,183,202,
CK_100:373|7c3c73a6-5f0a-4b2c-872a-1e17c5cd2d50	273	2	273	TRINITY_DN5314_c2_g1_i3	922	427	737	271	0	+	2	265,6,	2,267,	427,731,
CK_86:328|3e0bf4a5-994a-4c15-ba31-493d1335bcc4	238	0	237	TRINITY_DN806_c0_g2_i1	925	626	863	236	1	-	1	237,	1,	626,
CK_114:473|c863e9dd-5f70-4cce-8048-b2485613039b	358	2	358	TRINITY_DN15254_c0_g1_i2	3280	1658	3271	355	1	+	3	179,5,172,	2,181,186,	1658,1978,3099,
CK_94:1196|11d03f15-2163-4655-9cc3-02adfb07e5ca	1113	0	1111	TRINITY_DN675_c0_g1_i1	1560	23	1461	1108	3	+	4	118,162,241,590,	0,118,280,521,	23,228,416,871,
CK_103:546|d09020f5-a115-4cf3-96da-2dabde1bb4a3	450	0	447	TRINITY_DN24506_c0_g1_i1	2453	165	1194	447	0	-	2	224,223,	3,227,	165,971,
CK_101:801|db428ef6-6be1-4161-9cce-4c05fb53d6c8	702	0	702	TRINITY_DN635_c0_g1_i27	3652	304	1872	696	6	-	2	250,452,	0,250,	304,1420,
CK_90:1207|7782d8d4-eacf-4804-a384-3808eb4a880c	1123	2	1123	TRINITY_DN7102_c0_g1_i4	3134	1940	3081	1113	8	+	4	642,367,12,100,	2,644,1011,1023,	1940,2598,2967,2981,
CK_83:3073|2f3738ea-df4f-4879-a5cf-1f268e401822	3036	2	3031	TRINITY_DN1388_c0_g1_i1	4933	248	4914	3029	0	-	2	1799,1230,	5,1804,	248,3684,
CK_86:672|04108a58-6d31-41fc-9300-c231d192bece	585	3	585	TRINITY_DN31874_c0_g1_i17	1376	406	1212	581	1	-	2	87,495,	0,87,	406,717,
CK_96:1259|ba99645b-70ec-4d8f-9bfb-f7f1d282d8cb	1182	5	1182	TRINITY_DN331_c3_g1_i19	1350	119	1344	1174	3	+	3	93,1079,5,	5,98,1177,	119,257,1339,
CK_108:3213|9ca0ae7e-9d94-4cad-8596-3d5b04c3e490	3141	0	3138	TRINITY_DN3024_c3_g1_i1	4353	78	3390	3121	2	-	6	314,288,2371,9,24,117,	3,317,615,2990,3000,3024,	78,510,860,3237,3246,3273,
CK_90:1047|20ef3725-8981-46cb-bb01-eb9b93202f1a	977	0	977	TRINITY_DN1421_c0_g1_i2	1189	178	1155	973	4	-	1	977,	0,	178,
CK_96:2751|31a8640c-81c3-4480-be46-d71554a08086	2712	4	2712	TRINITY_DN2762_c0_g3_i2	2965	98	2843	2685	13	+	4	708,824,966,200,	4,717,1546,2512,	98,845,1676,2643,
CK_102:337|6417c3ca-c05a-4124-acb4-cf1be231c40b	233	0	233	TRINITY_DN7704_c0_g1_i3	2004	801	1360	232	1	-	2	16,217,	0,16,	801,1143,
CK_92:397|acce456d-a79b-4859-9de1-a3bc57d1ed51	312	0	312	TRINITY_DN6622_c0_g1_i1	597	22	359	311	1	-	2	5,307,	0,5,	22,52,
CK_92:697|0d5e1a95-1717-42e8-99f3-fd205ac0ebc3	603	0	598	TRINITY_DN10394_c1_g1_i1	1175	127	906	597	1	+	2	320,278,	0,320,	127,628,
CK_101:1556|457b6250-4b12-46d0-b4a3-b4f10776ee35	1465	2	1463	TRINITY_DN1172_c0_g1_i1	1516	28	1508	1453	8	-	2	1429,32,	2,1431,	28,1476,
CK_91:1192|f01c34de-ed42-4269-b06a-fe8bc1fc9549	1110	0	1110	TRINITY_DN3226_c0_g2_i3	1445	299	1411	1100	4	-	3	108,222,774,	0,109,336,	299,407,637,
CK_89:398|bd6b6ac6-8fe8-40bf-a08a-d444babcccd1	309	0	309	TRINITY_DN168814_c0_g1_i1	876	454	763	306	1	+	3	22,198,87,	0,24,222,	454,476,676,
CK_89:1584|b83b1196-f39c-4c4a-bc04-a861c32b684f	1507	0	1503	TRINITY_DN2889_c0_g1_i44	2431	31	2427	1499	4	+	4	25,892,94,492,	0,25,917,1011,	31,58,1064,1935,
CK_97:1889|2108462e-1a0c-4777-9354-003dfc90264e	1806	1	1806	TRINITY_DN555_c3_g2_i1	1887	4	1804	1789	3	-	6	18,6,6,1751,5,6,	0,18,33,42,1793,1799,	4,23,35,41,1793,1798,
CK_90:638|2b9b159d-9142-476d-8d51-c19f01d96204	548	0	548	TRINITY_DN12537_c0_g1_i17	1693	859	1408	545	0	-	5	247,106,18,93,81,	0,247,354,372,467,	859,1109,1215,1234,1327,
CK_90:1626|953ba866-0c50-47cf-b2b8-51278fcfeec6	1546	0	1540	TRINITY_DN7606_c0_g1_i1	2161	599	2138	1535	1	-	2	167,1369,	6,177,	599,769,
CK_106:657|fad36593-4b6a-43fd-82ea-e5b977dd4987	552	0	552	TRINITY_DN19347_c0_g1_i2	2280	88	1208	547	4	-	4	328,12,164,47,	0,328,341,505,	88,419,433,1161,
CK_87:682|37c279df-3bc4-4bb9-b882-a5060089b684	590	2	589	TRINITY_DN592_c0_g1_i4	4622	13	708	586	1	+	2	108,479,	2,110,	13,229,
CK_111:3099|cfc9e754-1071-4c24-be35-81fd40f24505	3005	3	2998	TRINITY_DN7839_c0_g1_i1	3413	21	3398	2983	10	+	4	117,853,2007,16,	3,120,973,2982,	21,139,1375,3382,
CK_90:836|700692c6-75a3-439e-a85f-52e15a7fce25	749	0	749	TRINITY_DN1116_c0_g1_i2	875	20	864	749	0	-	2	5,744,	0,5,	20,120,
CK_106:1282|b7b2bfc3-b8ee-4a1a-85f1-0b146c060c63	1183	1	1183	TRINITY_DN5464_c0_g1_i3	2953	1451	2819	1182	0	+	3	853,324,5,	1,854,1178,	1451,2401,2814,
CK_95:758|8bf43252-cc6b-4911-be38-5ae9756ed304	662	0	659	TRINITY_DN13931_c0_g3_i1	1393	156	814	657	0	+	3	13,284,360,	0,15,299,	156,169,454,
CK_95:857|a5e171e3-c8a8-4cee-94e8-12e3a894ea3d	766	0	764	TRINITY_DN3388_c0_g1_i1	911	46	911	762	2	+	3	165,584,15,	0,165,749,	46,310,896,
CK_92:1458|1eb666f1-59cf-4cbe-910a-1bfd503dbd1f	1358	0	1358	TRINITY_DN6214_c0_g1_i1	2491	275	2426	1349	8	-	3	762,3,592,	0,762,766,	275,1831,1834,
CK_100:1326|7d5bbf1b-b189-45e3-84ac-9b82502df83e	1222	1	1222	TRINITY_DN11144_c0_g1_i6	1509	254	1481	1212	4	+	4	371,615,121,109,	1,372,992,1113,	254,627,1248,1372,
CK_96:364|05bbc9fd-b0c6-433d-931a-87fd1abfca37	275	0	275	TRINITY_DN2150_c30_g1_i1	2512	1379	1704	274	1	-	2	270,5,	0,270,	1379,1699,
CK_102:1172|49ffd36e-fab0-4e11-ad4f-f38fb821386e	1087	2	1087	TRINITY_DN1578_c1_g2_i1	1599	251	1335	1079	5	+	2	238,846,	2,241,	251,489,
CK_87:450|7573eae8-3794-497d-bfd4-2851f9667ecf	377	0	376	TRINITY_DN133_c1_g1_i1	1181	546	1155	375	1	+	2	6,370,	0,6,	546,785,
CK_102:1267|323ad7a7-d71b-422b-9fff-12f7bf73a851	1170	0	1170	TRINITY_DN13510_c1_g1_i3	1931	166	1337	1162	7	+	4	857,203,29,80,	0,858,1061,1090,	166,1023,1227,1257,
CK_90:1234|9c00b86e-3411-4341-9644-930365f71b05	1159	0	1156	TRINITY_DN8352_c0_g1_i3	1831	555	1750	1151	2	+	4	10,20,179,944,	0,13,33,212,	555,571,594,806,
CK_94:414|ac8eb957-ad71-4b58-a157-68d1c1dcceef	323	0	323	TRINITY_DN492_c5_g1_i1	2366	2	375	320	3	-	2	24,299,	0,24,	2,76,
CK_89:2944|53b483cc-6c68-4b17-ae5f-063bc2182b2c	2875	4	2871	TRINITY_DN1952_c1_g1_i8	6006	0	5285	2858	7	+	7	759,627,428,555,7,270,219,	4,763,1391,1819,2374,2381,2652,	0,760,1387,3441,4000,4796,5066,
CK_88:3288|8515c7d4-a0ed-4926-8440-c447d8e01f4d	3213	0	3212	TRINITY_DN4346_c1_g1_i4	5648	877	5597	3205	2	+	7	800,252,213,14,598,850,480,	0,801,1057,1270,1284,1882,2732,	877,1677,1957,2171,2186,3558,5117,
CK_110:430|dd8a4b6d-99c9-4fc5-9e49-90deca1adf1f	317	0	317	TRINITY_DN46534_c4_g1_i1	1080	279	603	314	1	-	4	12,17,176,110,	0,12,29,207,	279,295,313,493,
CK_88:1049|2409541a-6ce7-4e9d-bdd0-eff5b55139d6	964	0	960	TRINITY_DN2661_c0_g1_i7	1743	133	1129	959	1	+	3	572,3,385,	0,572,575,	133,723,744,
CK_89:2432|fb25d760-8fcb-4b3c-a7dc-9d643a7fdb00	2362	3	2362	TRINITY_DN3198_c0_g1_i4	2533	11	2448	2343	4	-	4	71,1987,274,15,	0,71,2058,2344,	11,83,2159,2433,
CK_87:490|f6e5b541-8ad0-4833-ad97-ab2e5de9649b	402	0	402	TRINITY_DN14332_c0_g2_i1	2196	0	527	398	4	-	3	6,370,26,	0,6,376,	0,130,501,
CK_103:419|fcb43e4a-5ff3-4b0a-92f0-461f7b199705	328	0	328	TRINITY_DN3731_c1_g1_i4	823	276	638	328	0	-	2	247,81,	0,247,	276,557,
CK_101:420|eeb555f1-4638-4f4b-add1-40586517510a	319	0	319	TRINITY_DN30728_c0_g1_i1	497	104	425	316	1	+	6	56,9,185,13,17,37,	0,56,65,251,264,282,	104,161,172,357,371,388,
CK_103:1840|bf16780e-4140-4edd-9afb-30d02d3837d1	1749	4	1749	TRINITY_DN4345_c0_g1_i5	3256	1325	3205	1739	6	-	2	1048,697,	0,1048,	1325,2508,
CK_90:563|2e7e7ae8-ef37-4046-af29-73fbddfb11de	474	0	474	TRINITY_DN25088_c0_g2_i1	3221	48	1433	473	1	-	3	49,16,409,	0,49,65,	48,99,1024,
CK_89:2526|f3afc88f-fb76-4076-ba3a-9ad0e9e82b55	2448	1	2443	TRINITY_DN2442_c0_g1_i4	2986	346	2951	2440	2	+	3	603,1417,422,	1,604,2021,	346,974,2529,
CK_103:1932|bfc6f9d1-3b96-421e-8eaf-cac70a601c21	1857	5	1854	TRINITY_DN4190_c0_g1_i6	2828	356	2631	1843	6	-	3	913,70,866,	3,916,986,	356,1602,1765,
CK_102:2595|2c99a667-3c31-428e-ac67-71883e8de120	2500	3	2494	TRINITY_DN1952_c1_g1_i8	6006	10	5594	2484	6	+	8	8,1380,48,366,12,421,98,157,	3,11,1392,1440,1806,1818,2239,2337,	10,19,1399,1449,3441,3592,5230,5437,
CK_103:340|87759414-e233-4188-91f2-a1d8e31f7531	247	0	246	TRINITY_DN8031_c1_g1_i2	536	13	267	245	1	-	3	5,236,5,	1,6,242,	13,21,262,
CK_98:1740|2232deef-ea86-4c17-8a4e-c8ff6c8fa925	1642	6	1642	TRINITY_DN4519_c0_g1_i6	2489	481	2449	1632	0	+	5	867,6,704,32,23,	6,873,879,1585,1619,	481,1349,1690,2394,2426,
CK_111:1283|c5d67ecf-ab2e-4c3b-a4ea-eb2b52d0b466	1176	2	1174	TRINITY_DN1684_c1_g1_i1	2382	216	2241	1165	7	-	4	394,24,661,93,	2,396,420,1081,	216,740,1097,2148,
CK_105:1395|6de50d67-630a-48b1-8de2-06076ee3beef	1299	0	1298	TRINITY_DN5842_c0_g1_i25	2994	128	1668	1291	7	+	3	221,832,245,	0,221,1053,	128,590,1423,
CK_109:1622|69c77192-5fe0-4e61-8c38-30884d260e6e	1509	3	1506	TRINITY_DN3764_c0_g2_i5	1676	69	1673	1501	1	-	4	1177,311,8,6,	3,1180,1492,1500,	69,1347,1658,1667,
CK_93:1694|d338c85b-c32e-40af-a0ca-3c2d6f9006ad	1609	0	1603	TRINITY_DN4901_c0_g1_i12	2081	278	2048	1599	4	+	3	211,1139,253,	0,211,1350,	278,522,1795,
CK_108:684|0c5fd1c5-5e2b-4e13-9846-7ed53404a58c	577	3	577	TRINITY_DN2165_c0_g1_i5	1249	43	1134	573	1	+	2	390,184,	3,393,	43,950,
CK_93:1465|96443e98-0db0-41dc-a07a-eb96abdd2a36	1376	0	1373	TRINITY_DN14280_c0_g1_i1	2064	37	1904	1372	1	-	3	616,529,228,	3,619,1148,	37,1126,1676,
CK_100:457|f9516ab7-eecd-4a52-9e03-db0ec5362d86	354	0	354	TRINITY_DN170567_c0_g1_i2	934	421	777	353	0	+	2	324,29,	0,325,	421,748,
CK_100:3598|4f32056f-14ba-4511-b101-935a40e5e00a	3563	2	3563	TRINITY_DN450_c0_g1_i1	3657	9	3577	3528	8	-	5	152,528,1215,1589,52,	0,153,681,1908,3509,	9,164,694,1922,3525,
CK_99:808|a21fcd92-0579-4df0-8506-e687d742efad	709	3	709	TRINITY_DN518_c0_g2_i1	1653	642	1631	702	3	-	4	684,6,3,12,	0,685,691,694,	642,1329,1348,1619,
CK_92:1209|794ad63d-baa5-4631-92be-e93e11060a3b	1108	0	1104	TRINITY_DN22715_c0_g1_i1	5592	4369	5522	1097	6	-	5	59,32,13,757,242,	4,64,96,109,866,	4369,4428,4461,4482,5280,
CK_96:1760|29e13108-1ead-4a04-8ce2-d11cfed459ea	1717	1	1713	TRINITY_DN3379_c0_g1_i5	2162	106	2014	1705	7	+	2	1580,132,	1,1581,	106,1882,
CK_98:308|601977f9-0060-418c-9450-80a0759c0472	207	0	207	TRINITY_DN14245_c0_g3_i1	706	340	630	207	0	+	2	111,96,	0,111,	340,534,
CK_104:653|a01190dc-5b93-4cc5-a58d-d136dd7081ce	550	1	550	TRINITY_DN2432_c3_g1_i1	4844	4213	4762	545	1	+	7	226,37,27,57,71,7,121,	1,228,265,292,350,422,429,	4213,4439,4477,4505,4562,4633,4641,
CK_102:445|df03c95e-4dfa-4dee-bdaa-531886c95c16	341	0	341	TRINITY_DN7414_c0_g1_i3	2230	718	1472	341	0	+	2	336,5,	0,336,	718,1467,
CK_96:1473|52c9488f-0f60-4526-b91b-8c755c231f0c	1380	0	1380	TRINITY_DN31926_c0_g2_i1	2732	224	1595	1367	4	-	7	27,675,257,99,36,113,164,	0,29,705,964,1064,1101,1216,	224,251,926,1183,1282,1318,1431,
CK_108:487|5905d912-df7d-4422-83d7-de51e3647a21	380	0	380	TRINITY_DN17583_c0_g2_i1	1541	846	1279	378	0	+	4	305,37,31,5,	0,305,344,375,	846,1154,1191,1274,
CK_101:1401|f2c39aa7-b06a-41c7-b2cb-234b12b212ed	1343	2	1342	TRINITY_DN866_c0_g1_i10	1598	87	1528	1333	6	+	3	140,535,664,	2,142,678,	87,329,864,
CK_46:248|bb8e6c71-e641-4e58-867e-cd1234d95148	205	0	205	TRINITY_DN29531_c0_g1_i5	4237	1653	2334	205	0	-	2	200,5,	0,200,	1653,2329,
CK_81:725|d550217a-b721-4cb8-aa33-afe721504c36	644	0	644	TRINITY_DN764_c0_g1_i21	4137	2504	3222	643	1	+	3	375,89,180,	0,375,464,	2504,2951,3042,
CK_98:969|707e4234-1b45-4c2f-bcb2-61bbe1ece9f5	880	0	879	TRINITY_DN12280_c0_g1_i4	1080	20	987	872	5	-	5	5,27,26,701,118,	1,7,35,61,762,	20,25,52,79,869,
CK_77:1698|500f610c-a532-47a0-b752-97cc85c52d75	1644	0	1642	TRINITY_DN10724_c0_g1_i1	3164	117	3061	1634	4	-	7	925,205,369,47,32,30,30,	2,927,1132,1503,1552,1584,1614,	117,1043,2548,2917,2965,2999,3031,
CK_110:1350|24bfa6e9-916b-4e41-ab19-8cc6441395c5	1272	2	1268	TRINITY_DN20871_c0_g1_i12	2391	71	1415	1265	1	+	2	635,631,	2,637,	71,784,
CK_89:408|d6df41cb-3f9d-4c3b-96fe-8e2febedc01a	321	0	321	TRINITY_DN25533_c0_g1_i1	965	540	865	318	0	+	5	54,82,82,38,62,	0,57,139,221,259,	540,598,681,764,803,
CK_83:2696|1cac4663-7291-48ce-b97b-2fa0c58e69a9	2637	4	2637	TRINITY_DN3754_c1_g1_i2	2891	0	2810	2617	3	-	7	6,81,1123,680,679,25,26,	0,6,88,1211,1891,2578,2607,	0,59,140,1267,2073,2759,2784,
CK_91:1614|1791dda3-01ef-417c-8c3c-fe6b193fac6a	1530	0	1529	TRINITY_DN10846_c0_g1_i4	2113	109	2059	1522	4	-	4	1436,5,79,6,	1,1439,1444,1524,	109,1548,1974,2053,
CK_70:690|d004b1f4-a723-491c-99ef-23f5380bbde7	618	0	618	TRINITY_DN1964_c1_g1_i4	1438	780	1402	614	4	+	2	109,509,	0,109,	780,893,
CK_91:639|04ba4470-4b98-4b6a-9325-9dba854accb3	547	0	546	TRINITY_DN95670_c0_g1_i1	991	175	729	543	0	-	8	6,77,180,28,111,8,10,123,	1,8,85,266,294,405,413,424,	175,183,263,443,472,585,594,606,
CK_93:3237|6e401940-8e73-4448-9bbf-574a1f7557f0	3161	0	3157	TRINITY_DN3285_c0_g1_i1	3432	51	3378	3146	11	-	3	2817,94,246,	4,2821,2915,	51,3023,3132,
CK_91:467|2e116cc4-1209-48b2-8243-ab2b12f22f44	373	0	373	TRINITY_DN5751_c0_g1_i1	726	55	559	372	1	-	2	267,106,	0,267,	55,453,
CK_86:709|b3271c77-8ae6-424a-8008-36023a991d1f	631	0	631	TRINITY_DN4640_c0_g1_i1	3762	1036	1973	629	2	+	3	585,41,5,	0,585,626,	1036,1674,1968,
CK_96:360|3f6669fb-8568-49b4-a0eb-c041ee023320	264	1	264	TRINITY_DN53519_c0_g1_i1	1644	1326	1603	262	0	+	5	107,93,38,15,9,	1,109,202,240,255,	1326,1436,1530,1578,1594,
CK_97:631|635bed0e-60f4-42fa-802a-291ba0a4d68a	535	0	534	TRINITY_DN11711_c2_g1_i4	1763	1167	1702	531	0	+	4	7,4,360,160,	0,7,12,374,	1167,1175,1182,1542,
CK_79:667|e20868ad-63a9-474a-ad78-06a6b410dbb6	606	0	606	TRINITY_DN5218_c1_g1_i2	4121	43	1108	605	0	+	4	6,300,13,286,	0,6,307,320,	43,503,803,822,
CK_107:774|0a373d22-fb2a-49c4-9a7f-2175b0825441	662	0	661	TRINITY_DN14844_c0_g1_i5	2633	1737	2398	657	4	-	1	661,	1,	1737,
CK_38:666|d64a62d3-8364-46d3-b252-5aef03ca7aa3	625	0	625	TRINITY_DN3878_c0_g1_i26	2374	429	1156	624	1	+	2	320,305,	0,320,	429,851,
CK_89:474|6f4ece60-6439-4932-9bd4-5ebccd462edf	404	0	404	TRINITY_DN1068_c0_g1_i3	3383	29	463	400	0	-	4	8,84,182,126,	0,11,96,278,	29,47,131,337,
CK_100:887|1828514d-b8b7-49c9-9cea-b2ac9129a133	818	2	818	TRINITY_DN1364_c0_g3_i1	2649	88	908	811	5	-	2	38,778,	0,38,	88,130,
CK_100:314|4d74da26-7af8-484e-b986-ae6c6168e8a6	215	0	215	TRINITY_DN4596_c0_g1_i1	3361	884	2590	214	1	+	2	115,100,	0,115,	884,2490,
CK_108:632|6b8522a3-1b5b-4e09-8065-72750b4e0b88	523	0	523	TRINITY_DN11650_c0_g1_i1	3425	672	1195	520	2	+	3	259,118,145,	0,259,378,	672,932,1050,
CK_100:452|dfce1ff4-31d3-4532-bb4d-670769a23ec6	357	0	357	TRINITY_DN11614_c0_g3_i1	1539	73	966	356	1	+	2	31,326,	0,31,	73,640,
CK_90:1051|5692b10d-d965-4e7d-8046-a7d38425b4a7	971	0	968	TRINITY_DN2515_c0_g1_i4	1554	179	1541	966	1	+	3	253,304,410,	0,254,558,	179,432,1131,
CK_105:606|cf118e7b-924d-4c6f-bc65-fa138baa0b67	495	2	495	TRINITY_DN19776_c0_g1_i1	2517	259	2500	491	2	+	2	265,228,	2,267,	259,2272,
CK_94:1504|4c0ad646-27a8-44ed-bb50-331d237b33ae	1436	0	1431	TRINITY_DN31078_c0_g1_i5	2838	1067	2579	1429	2	-	2	360,1071,	5,365,	1067,1508,
CK_88:1515|1c4e0571-a9a7-43b9-af49-dc42376ea92c	1430	0	1430	TRINITY_DN7698_c0_g1_i3	2799	738	2602	1426	4	-	2	6,1424,	0,6,	738,1178,
CK_97:1387|caa6907c-7c3b-4e79-a8da-7fcd4988156b	1280	0	1280	TRINITY_DN7232_c0_g1_i1	4082	2784	4063	1274	5	+	2	1234,45,	0,1235,	2784,4018,
CK_92:946|6087ea58-b5df-42e5-bba4-6269bdef9782	864	2	864	TRINITY_DN1944_c1_g2_i11	1049	145	1015	858	4	+	2	564,298,	2,566,	145,717,
CK_95:1701|6ff7ffea-0ba5-45a9-9589-b747eda5b3c3	1622	0	1622	TRINITY_DN25831_c0_g1_i6	3254	1248	3030	1622	0	-	2	6,1616,	0,6,	1248,1414,
CK_94:865|612238a3-6cad-4be5-9fc7-80b1b27680e2	793	0	792	TRINITY_DN4878_c0_g1_i3	4864	4011	4845	787	1	-	2	352,436,	1,357,	4011,4409,
CK_114:571|b086d02c-559f-4d8d-a0e0-0eccdc03e063	461	0	461	TRINITY_DN4674_c0_g1_i5	2562	844	1525	460	0	+	3	159,294,7,	0,160,454,	844,1015,1518,
CK_95:445|055225be-8e3e-497c-8ce8-705ba34b7216	354	0	354	TRINITY_DN16319_c0_g1_i2	5573	250	1461	353	1	-	2	150,204,	0,150,	250,1257,
CK_89:697|067a5b32-0154-451e-9c76-b469770f7d7e	611	0	611	TRINITY_DN2099_c0_g3_i2	1844	609	1219	605	1	+	2	283,323,	0,288,	609,896,
CK_102:311|a114464b-3370-450a-be95-2bb9369f7203	209	0	209	TRINITY_DN20826_c3_g1_i1	744	335	546	208	1	+	2	60,149,	0,60,	335,397,
CK_100:728|42a9c23d-3246-424e-a9d2-f59092317753	627	0	627	TRINITY_DN43251_c0_g1_i1	1057	401	1036	622	2	-	9	59,20,27,31,22,17,74,190,184,	0,60,81,109,140,162,179,253,443,	401,462,482,512,544,567,585,660,852,
CK_107:385|c32313f3-78e5-432a-a03b-c5ea6bf7360b	280	0	278	TRINITY_DN12349_c1_g1_i6	2824	2389	2669	278	0	+	2	270,8,	0,270,	2389,2661,
CK_87:317|d0ba99f7-46c0-4bf0-9285-cb16da983130	237	0	237	TRINITY_DN3858_c1_g2_i2	923	270	888	237	0	+	2	8,229,	0,8,	270,659,
CK_103:945|281cb6d8-c27c-44ec-abcd-ff090135d7a2	870	0	870	TRINITY_DN6777_c0_g1_i2	5515	4612	5508	867	2	+	2	84,785,	0,85,	4612,4723,
CK_94:1066|924f4d5a-7f6b-4726-994a-6601b890717f	980	7	980	TRINITY_DN5034_c0_g2_i1	1130	89	1062	971	2	-	1	973,	0,	89,
CK_106:2952|9cac3f3a-32e5-4292-af6f-6dc3cb4b299a	2849	4	2849	TRINITY_DN5636_c0_g1_i3	3662	47	3430	2837	8	+	3	1873,318,654,	4,1877,2195,	47,2061,2776,
CK_92:589|40569afb-fc2f-4e17-b610-1036e8b30858	495	0	495	TRINITY_DN17_c0_g2_i9	2221	996	2188	495	0	+	3	386,10,99,	0,386,396,	996,1717,2089,
CK_92:2228|95f02d05-aca2-44e9-8e9a-96b837df5253	2143	0	2136	TRINITY_DN241_c0_g1_i2	2586	195	2326	2123	4	+	8	86,27,37,12,6,46,9,1904,	0,87,115,152,164,171,223,232,	195,281,308,346,359,365,412,422,
CK_113:2058|36f84526-a98c-4a65-b1f7-d33b2ee8aa9c	1956	3	1953	TRINITY_DN25223_c0_g1_i6	3922	201	3015	1945	2	+	4	1394,61,439,53,	3,1397,1458,1900,	201,1946,2523,2962,
CK_90:1115|51c6e1f3-5e8a-4a97-b8f6-96a62ea635b3	1035	0	1029	TRINITY_DN1935_c1_g1_i1	1113	0	1041	1027	1	-	3	88,122,818,	6,94,217,	0,89,223,
CK_90:2259|101c4e73-7d4f-457a-ac9c-9e1cb032037a	2190	0	2189	TRINITY_DN6080_c0_g1_i21	5268	2856	5065	2180	8	-	3	1294,835,59,	1,1296,2131,	2856,4150,5006,
CK_98:1124|831fd4df-b3da-410e-856f-3a11f62fd919	1061	5	1061	TRINITY_DN6924_c0_g1_i1	1189	32	1188	1055	1	+	2	1050,6,	5,1055,	32,1182,
CK_85:2145|89ce80ee-a6a7-4f3f-845f-6cc94303101a	2077	0	2073	TRINITY_DN3813_c1_g1_i9	2287	105	2227	2064	9	-	2	868,1205,	4,872,	105,1022,
CK_103:358|b5765ec2-4dc4-4c00-8c78-e57ddc4c1449	255	0	255	TRINITY_DN22486_c3_g1_i1	997	7	262	254	1	+	1	255,	0,	7,
CK_104:470|c9e9b1c3-1045-4eab-ae43-c1acfb849762	368	0	367	TRINITY_DN8069_c0_g1_i28	2796	176	624	366	0	-	3	205,91,70,	1,207,298,	176,393,554,
CK_76:925|2fa33e8a-b741-468e-87d9-f313d5d8d2a4	859	0	857	TRINITY_DN33239_c0_g1_i18	1149	0	1074	855	2	-	4	520,301,8,28,	2,522,823,831,	0,650,952,1046,
CK_101:995|d52b573f-c523-4432-ac78-7bc9c0380f46	903	1	901	TRINITY_DN2567_c1_g1_i1	2302	903	2298	900	0	+	4	280,35,535,50,	1,281,316,851,	903,1572,1711,2248,
CK_94:502|e947e4f1-eb78-486c-b715-9119f050dbdb	411	0	408	TRINITY_DN1639_c0_g1_i1	2175	117	536	408	0	-	4	5,312,86,5,	3,8,320,406,	117,123,436,531,
CK_105:1870|b1e2726d-6bc7-43db-87ae-e8cb95308fee	1792	2	1788	TRINITY_DN36974_c0_g1_i1	2700	662	2451	1779	1	+	8	1687,7,10,27,17,9,14,9,	2,1690,1700,1712,1739,1756,1765,1779,	662,2352,2361,2371,2399,2417,2427,2442,
CK_102:419|1bd1e41f-1a26-499c-bb51-3568bbacb968	318	0	318	TRINITY_DN25466_c0_g1_i4	766	5	331	317	1	-	3	56,247,15,	0,56,303,	5,68,316,
CK_89:1950|aa99d1d6-2f06-48cd-a481-fc03cd8fb505	1880	2	1880	TRINITY_DN13425_c0_g1_i4	3025	68	2588	1869	8	+	6	142,4,940,213,80,498,	2,145,149,1089,1302,1382,	68,213,218,1285,2009,2090,
CK_94:362|ecdcb4f2-af00-4e6a-a39b-318c557bd31b	266	0	266	TRINITY_DN8649_c0_g1_i1	893	560	826	264	2	-	1	266,	0,	560,
CK_104:1876|ecd24411-a383-4ca3-889f-44bbdf8d354e	1828	8	1828	TRINITY_DN9005_c0_g1_i5	3598	29	3354	1811	9	+	4	7,865,881,67,	8,15,880,1761,	29,44,2289,3287,
CK_93:583|6152399a-df7d-4b0d-8188-7fb5812ee317	496	0	495	TRINITY_DN6726_c2_g1_i1	1663	949	1630	493	0	+	4	88,239,9,157,	0,88,329,338,	949,1038,1282,1473,
CK_109:493|9e02a359-772e-47f3-a8ef-142e7981ccef	387	0	387	TRINITY_DN17583_c0_g2_i1	1541	846	1232	384	2	+	2	363,23,	0,364,	846,1209,
CK_88:297|bc3b8588-ba06-4df0-a6df-a27fcea6c6c3	212	0	212	TRINITY_DN3539_c0_g1_i10	1354	1078	1347	210	0	+	4	183,9,13,5,	0,184,194,207,	1078,1261,1270,1342,
CK_100:1913|f08d016b-a12d-49ac-abb3-9287b829eeb7	1833	2	1833	TRINITY_DN664_c0_g1_i6	3291	318	2193	1818	13	-	3	182,299,1350,	0,182,481,	318,542,843,
CK_98:520|c1c0848e-d20d-4294-9c9a-adec28fbf9ab	421	2	420	TRINITY_DN5863_c0_g1_i1	2502	2083	2502	417	0	-	2	387,30,	1,389,	2083,2472,
CK_100:714|0e4035cb-4c0a-4c23-95a8-08122e04944a	612	0	612	TRINITY_DN8378_c0_g1_i3	3617	565	2503	606	4	-	5	311,29,151,9,110,	0,311,341,493,502,	565,2018,2047,2201,2393,
CK_94:320|9c482c43-bea9-435f-9c62-7c7d2315f200	224	0	224	TRINITY_DN4162_c0_g1_i1	489	24	254	224	0	-	2	9,215,	0,9,	24,39,
CK_88:732|4d775f0b-002b-4792-8e6c-937697f4237e	645	0	643	TRINITY_DN108741_c0_g1_i1	707	43	686	639	4	-	1	643,	2,	43,
CK_90:2518|316aadb6-f9be-40cf-820a-b35d446c7195	2456	22	2456	TRINITY_DN12004_c0_g1_i2	2528	0	2434	2434	0	+	1	2434,	22,	0,
CK_91:1401|e7ca8cae-ed7f-4e97-9233-5746662750b4	1303	0	1303	TRINITY_DN1986_c1_g1_i4	1976	48	1952	1296	5	-	3	587,680,34,	0,588,1269,	48,727,1918,
CK_111:440|b1c06475-464f-47e3-8173-76d0c3f24e49	334	0	334	TRINITY_DN28970_c0_g1_i1	2395	10	679	332	1	-	3	7,140,186,	0,7,148,	10,353,493,
CK_91:1589|809029a1-d23f-4463-9041-4cdebf7639fa	1499	0	1499	TRINITY_DN4146_c0_g1_i5	4027	2210	3953	1495	4	-	3	313,94,1092,	0,313,407,	2210,2690,2861,
CK_91:1575|ec4aa8fa-cbbe-4d38-8e0c-a723590b879a	1485	0	1483	TRINITY_DN7628_c0_g1_i1	2003	406	1995	1476	0	-	4	77,1058,290,51,	2,81,1139,1434,	406,483,1651,1944,
CK_85:2046|f22af921-25cd-473a-916e-7e58f060ef88	1987	0	1987	TRINITY_DN23076_c0_g1_i1	4548	53	2101	1973	3	+	5	161,33,1654,65,63,	0,164,204,1858,1924,	53,260,317,1973,2038,
CK_96:339|91574ead-d2a6-4a0d-a32a-171f15d66cf3	246	0	246	TRINITY_DN15648_c0_g1_i1	857	610	856	245	1	+	1	246,	0,	610,
CK_98:2490|be7b2714-5b91-42e7-8490-eaa98e34fcc2	2393	2	2393	TRINITY_DN4052_c0_g1_i5	2538	14	2439	2381	6	-	3	1985,391,11,	0,1986,2380,	14,2037,2428,
CK_102:624|7da6f55d-7bb5-4fa6-9b6b-6d7426f61df8	523	1	523	TRINITY_DN8740_c0_g1_i3	2037	3	525	521	1	-	1	522,	0,	3,
CK_103:927|d3a7ccba-6134-4e82-8cb3-f441c5d30e7c	828	0	828	TRINITY_DN1057_c0_g2_i1	2771	1287	2325	826	2	+	2	114,714,	0,114,	1287,1611,
CK_91:3828|dc868178-4f9b-42bc-9a65-cc07ed79df29	3788	3	3780	TRINITY_DN1497_c0_g1_i4	5059	158	5059	3762	8	-	4	256,196,151,3167,	8,266,467,618,	158,414,610,1892,
CK_87:384|a35bbb09-b9d6-4498-8386-2441f31390a4	301	0	301	TRINITY_DN1270_c0_g1_i8	7159	257	822	298	3	+	2	294,7,	0,294,	257,815,
CK_104:549|1663afcd-197f-4983-a51a-dfccf3daec6d	449	2	449	TRINITY_DN13464_c0_g2_i4	1981	125	575	447	0	-	2	165,282,	0,165,	125,293,
CK_102:424|c0766482-3fd4-4731-9cae-8f60292e22ac	322	0	320	TRINITY_DN124_c9_g1_i3	783	190	673	319	1	-	3	7,305,8,	2,9,314,	190,198,665,
CK_104:2919|e33619f1-9904-4093-83c6-8255d998039e	2831	3	2829	TRINITY_DN2671_c2_g1_i1	3079	61	3072	2804	13	-	4	1909,109,771,28,	2,1918,2028,2800,	61,2009,2263,3044,
CK_104:392|1de48287-c036-4841-82f7-260bb208b48c	286	0	286	TRINITY_DN22989_c0_g1_i1	1016	528	832	285	1	+	2	277,9,	0,277,	528,823,
CK_106:447|0c6e2eff-cbb4-434b-af69-094ab7e8d741	340	0	340	TRINITY_DN16618_c0_g2_i1	727	5	349	337	0	-	3	8,189,140,	0,8,200,	5,14,209,
CK_90:967|05c2059e-fc94-48ae-b016-9eb3a5562e5c	886	0	886	TRINITY_DN15370_c0_g2_i1	1208	146	1165	878	8	+	2	755,131,	0,755,	146,1034,
CK_90:2174|1f456c36-470c-4f8f-9871-5b59752a5dc7	2089	0	2089	TRINITY_DN2484_c0_g1_i4	2251	109	2211	2070	6	+	7	29,27,8,1971,9,20,12,	0,29,68,76,2047,2057,2077,	109,142,185,195,2167,2176,2199,
CK_99:1033|86f68aec-3bf9-4849-bcf2-40b7ecc0f831	931	0	931	TRINITY_DN7776_c0_g1_i4	15823	127	1063	922	5	-	7	61,7,80,4,256,227,292,	0,64,72,152,156,412,639,	127,193,200,281,286,543,771,
CK_102:639|6045bb8d-567c-4a3d-a5f6-1dad8bb48a76	537	0	534	TRINITY_DN54585_c0_g2_i1	769	117	723	534	0	+	2	167,367,	0,167,	117,356,
CK_86:1308|d054f6b6-07b9-43e9-8c44-08404b26d36e	1248	2	1247	TRINITY_DN4043_c0_g1_i7	1540	31	1414	1241	4	-	3	364,4,877,	1,365,369,	31,472,537,
CK_101:970|7f057a88-51b7-4220-9443-8f59848f8c31	873	2	871	TRINITY_DN4818_c2_g1_i1	1065	50	919	865	4	-	1	869,	2,	50,
CK_79:1971|17259a46-0438-4f2a-b5db-f6386d9500ef	1909	6	1906	TRINITY_DN4685_c0_g1_i2	3724	156	3241	1892	8	-	2	374,1526,	3,377,	156,1715,
CK_114:2156|38d154d8-6122-4eb4-a6cd-212ce81ca4f9	2048	0	2044	TRINITY_DN4638_c0_g1_i12	2952	252	2371	2040	4	-	5	94,150,182,1312,306,	4,98,248,430,1742,	252,347,502,747,2065,
CK_96:497|53882707-74fb-45f7-8136-e86136bfb72c	406	0	406	TRINITY_DN8433_c0_g1_i1	1894	20	432	406	0	+	4	19,6,85,296,	0,19,25,110,	20,43,50,136,
CK_91:1140|f4f0fbe5-91ed-4959-bde7-ae1720d00ab2	1062	0	1059	TRINITY_DN29621_c0_g1_i4	2358	71	1152	1053	6	+	3	70,624,365,	0,70,694,	71,143,787,
CK_109:558|9c8afa9d-d779-4b76-a0e0-36e01e326feb	451	0	451	TRINITY_DN550_c3_g1_i4	1317	769	1316	447	4	+	2	76,375,	0,76,	769,941,
CK_93:1642|7e3538a3-ae2d-4d13-8134-0b2b00f50e0c	1569	0	1569	TRINITY_DN5459_c0_g1_i1	4403	2707	4374	1565	4	+	3	477,1086,6,	0,477,1563,	2707,3250,4368,
CK_100:1445|314b1069-486d-4b0f-8044-53531ec764b8	1356	3	1356	TRINITY_DN13169_c0_g1_i1	1913	339	1767	1347	5	-	4	512,771,7,62,	0,512,1283,1291,	339,924,1698,1705,
CK_101:2425|03b6187a-5962-4f84-bd37-477803ad92b3	2317	3	2317	TRINITY_DN3261_c1_g1_i2	4610	2130	4494	2300	13	-	3	6,2121,186,	0,6,2128,	2130,2187,4308,
CK_103:694|54987913-7bd9-4a33-90c3-33fa0073f06f	614	0	614	TRINITY_DN32504_c0_g1_i2	1740	266	1691	611	3	+	2	506,108,	0,506,	266,1583,
CK_90:1222|443aed30-8cd3-4d1d-a260-15ef62135d59	1135	0	1131	TRINITY_DN3132_c0_g1_i2	1379	20	1168	1131	0	+	2	863,268,	0,863,	20,900,
CK_100:1355|fc62ddf2-3d56-4d7e-a768-29f0c1557946	1259	3	1259	TRINITY_DN8485_c0_g1_i26	5241	1775	3039	1251	1	-	10	101,107,44,7,22,5,14,191,264,497,	0,101,209,254,261,285,290,304,495,759,	1775,1878,1985,2029,2038,2061,2067,2082,2277,2542,
CK_102:1211|acaf1173-08e4-42fc-86ee-7d88c00be022	1104	0	1104	TRINITY_DN7877_c0_g1_i3	2471	458	2275	1098	6	-	4	14,41,392,657,	0,14,55,447,	458,473,702,1618,
CK_106:414|041f63b2-e998-4799-a839-113cc2cab6ec	317	0	317	TRINITY_DN7741_c0_g1_i4	1394	78	394	314	2	-	2	232,84,	0,233,	78,310,
CK_94:415|155abd4c-52e1-4743-a71c-1a41f4723514	320	0	320	TRINITY_DN25088_c0_g2_i1	3221	865	1699	320	0	+	2	146,174,	0,146,	865,1525,
CK_93:1162|16b1d2aa-72ac-4eee-8db3-40358e5e666b	1070	0	1069	TRINITY_DN75_c3_g1_i4	1148	67	1140	1063	3	+	4	137,791,126,12,	0,138,931,1057,	67,204,1000,1128,
CK_90:1927|5fca9c66-ae9c-48c1-98c5-8be77dec28a0	1846	0	1838	TRINITY_DN29293_c0_g1_i3	5112	81	2579	1833	5	+	2	1517,321,	0,1517,	81,2258,
CK_87:588|f8c5a018-8f2f-4637-ae4f-4107cedd8f0f	510	0	510	TRINITY_DN7790_c0_g1_i1	2225	1441	2137	507	3	+	2	26,484,	0,26,	1441,1653,
CK_88:1732|9606b1f8-6daa-4e11-9bc8-60a0b71ace6a	1672	5	1672	TRINITY_DN4146_c0_g1_i5	4027	2209	3953	1659	8	-	2	575,1092,	0,575,	2209,2861,
CK_92:833|91ce9711-c627-4f8f-ab8c-5d072d27c659	737	0	737	TRINITY_DN6781_c0_g4_i3	3916	2322	3342	730	1	+	4	5,7,714,5,	0,5,18,732,	2322,2328,2340,3337,
CK_89:425|e435722a-817d-407b-b093-66e85dcc8e69	339	0	339	TRINITY_DN14106_c0_g2_i13	3988	3443	3961	338	1	+	2	283,56,	0,283,	3443,3905,
CK_107:1817|dc2b809b-5b41-4e3c-8a4d-124024258cdb	1728	3	1727	TRINITY_DN17_c0_g2_i9	2221	64	2068	1715	1	+	7	50,575,675,10,59,231,116,	3,54,635,1311,1321,1380,1611,	64,114,695,1372,1509,1720,1952,
CK_89:495|eb9d6358-bb3b-430a-a4dd-9f978b75782e	415	0	412	TRINITY_DN7717_c0_g1_i12	1923	29	443	411	0	-	5	6,5,20,24,356,	3,9,15,35,59,	29,36,41,62,87,
CK_102:862|2689f754-ec4a-4b5c-a18e-c079dfb751ca	767	0	767	TRINITY_DN217_c1_g1_i5	3210	2358	3154	765	2	+	3	167,516,84,	0,167,683,	2358,2552,3070,
CK_90:535|c997b7fa-4420-41b7-a283-99b103de0680	437	0	437	TRINITY_DN575_c0_g2_i1	1585	23	1570	435	1	-	3	167,11,258,	0,168,179,	23,192,1312,
CK_87:713|e22f5a2e-3fd0-4866-b386-6960e47403d1	631	0	631	TRINITY_DN19185_c0_g3_i2	1041	369	1007	625	2	-	4	74,120,83,350,	0,76,196,281,	369,443,574,657,
CK_93:1531|d29e88ad-bfbc-460b-baa7-449b8cb6d797	1438	1	1438	TRINITY_DN3493_c0_g1_i1	1860	27	1810	1426	2	+	4	183,1209,8,28,	1,184,1393,1410,	27,553,1763,1782,
CK_97:1362|eadf79c7-bbba-4fe2-b472-5a61c9973f97	1270	2	1270	TRINITY_DN4953_c0_g1_i5	3310	139	1407	1260	4	+	6	62,25,51,15,126,985,	2,65,90,144,159,285,	139,201,227,279,295,422,
CK_98:376|9eea71bf-9e5b-42cb-905d-4afac488f4f6	275	0	275	TRINITY_DN510_c3_g1_i1	1439	91	371	273	1	-	2	14,260,	0,15,	91,111,
CK_92:403|bd24f6ef-806b-4668-b0d0-40ca76061e39	316	0	316	TRINITY_DN133_c1_g1_i1	1181	494	1113	315	1	+	2	212,104,	0,212,	494,1009,
CK_104:867|869ceb7f-ff38-4f7a-adb6-a43c0cd9f9fd	751	0	751	TRINITY_DN550_c3_g1_i4	1317	386	1245	744	7	+	3	132,117,502,	0,132,249,	386,524,743,
CK_106:1094|13f1c9b2-2b7a-4719-ae06-fc1818b9ea38	991	0	987	TRINITY_DN10865_c0_g1_i2	2185	69	1077	982	3	-	2	453,532,	4,459,	69,545,
CK_90:744|eb80ccfd-f3be-40fe-907d-37c101d993e9	657	0	657	TRINITY_DN2455_c0_g1_i1	2516	1720	2468	655	2	+	3	148,6,503,	0,148,154,	1720,1870,1965,
CK_94:1180|406cce8a-522f-498f-addc-10c7365850df	1094	0	1094	TRINITY_DN11551_c0_g1_i2	1282	60	1278	1092	0	+	8	654,202,3,20,168,19,16,10,	0,656,858,861,881,1049,1068,1084,	60,715,918,1016,1037,1206,1227,1268,
CK_101:1029|1b55dd92-1148-4a0a-a28a-d5a0175a150e	928	4	927	TRINITY_DN6922_c0_g3_i1	1518	6	929	919	4	+	1	923,	4,	6,
CK_99:322|7dbe7600-0b8b-4a6d-8b61-c8aa99dbfe4c	226	1	226	TRINITY_DN471_c0_g1_i3	1661	856	1251	225	0	+	2	218,7,	1,219,	856,1244,
CK_95:956|50c95307-79f5-49a3-865c-a116403a42b1	869	0	869	TRINITY_DN2863_c2_g1_i1	3938	90	1055	867	1	-	3	10,755,103,	0,11,766,	90,105,952,
CK_101:1055|0c365c49-59fe-471e-8d8c-27e7ee37d393	965	3	964	TRINITY_DN1549_c0_g1_i1	1226	57	1018	959	2	+	1	961,	3,	57,
CK_91:316|bd73de9d-992e-4c0d-83e7-dbf19ef0fd70	227	0	227	TRINITY_DN36375_c0_g1_i1	820	205	436	225	2	-	3	95,17,115,	0,95,112,	205,303,321,
CK_94:1435|9187be27-c334-449a-8378-da161391de3a	1339	0	1333	TRINITY_DN15884_c0_g1_i2	2318	403	2207	1328	5	+	4	6,463,92,772,	0,6,469,561,	403,429,1261,1435,
CK_93:2076|c6db2d9a-69d7-4e21-826a-b5c2e3503763	2070	0	2065	TRINITY_DN2484_c0_g1_i4	2251	145	2212	2054	10	+	4	6,2040,14,4,	0,6,2046,2061,	145,153,2194,2208,
CK_91:384|fc791e04-43ba-4947-be59-b2fed6b55888	294	0	294	TRINITY_DN64921_c0_g1_i1	1598	325	958	292	2	+	3	257,31,6,	0,257,288,	325,583,952,
CK_103:1382|56d1ad4c-8aef-494f-83ad-0d1db7163636	1276	2	1276	TRINITY_DN1339_c7_g1_i4	1909	55	1371	1274	0	+	2	250,1024,	2,252,	55,347,
CK_100:906|e23d5625-3ba5-421c-9685-d21c358da014	807	0	807	TRINITY_DN6958_c0_g1_i4	2238	1120	1927	800	1	+	4	73,335,361,32,	0,74,412,775,	1120,1193,1533,1895,
CK_89:1826|86e8b716-e58e-4688-8f37-033f7c4c4c94	1751	0	1747	TRINITY_DN3055_c0_g1_i48	3324	513	2779	1736	2	+	7	385,141,290,48,24,102,748,	0,385,527,819,867,897,999,	513,1315,1456,1746,1796,1828,2031,
CK_103:844|3eb7e5c9-24c4-43e6-85b8-77830afd0374	753	1	750	TRINITY_DN3786_c0_g1_i5	2395	368	1135	749	0	+	2	75,674,	1,76,	368,461,
CK_109:640|40d7b539-88de-4764-aba4-ef5e3cfc469a	530	2	530	TRINITY_DN8786_c0_g1_i1	2095	50	581	526	2	-	2	340,188,	0,340,	50,393,
CK_97:1987|6e93f5a8-b75a-4956-aa48-b61ca97f2d7d	1937	2	1937	TRINITY_DN4432_c0_g2_i3	5773	3575	5598	1930	5	-	2	1500,435,	0,1500,	3575,5163,
CK_90:352|7bce5fa9-f8e9-47f0-99b3-6b02024d4379	266	0	265	TRINITY_DN3646_c0_g1_i5	1333	287	772	265	0	-	2	260,5,	1,261,	287,767,
CK_108:2620|dd8b2f86-f771-4115-9446-9e1904deaba8	2623	0	2622	TRINITY_DN32499_c0_g1_i2	3145	147	2842	2618	2	-	2	553,2067,	1,556,	147,775,
CK_103:1390|c5d16ed3-f7d7-4293-b839-5aba12f983bc	1298	0	1298	TRINITY_DN2104_c0_g1_i3	4200	1664	3259	1292	6	-	4	85,7,10,1196,	0,85,92,102,	1664,1806,2050,2063,
CK_100:461|a880cdf6-a027-4d41-b8ac-7a178c09eb1f	361	0	359	TRINITY_DN10952_c0_g1_i11	1324	869	1236	359	0	+	5	104,24,59,25,147,	0,104,128,187,212,	869,976,1001,1063,1089,
CK_104:540|f59d515b-c82a-40ad-bdcc-532991bf3515	434	0	431	TRINITY_DN3765_c0_g1_i17	3156	170	845	430	1	-	2	355,76,	3,358,	170,769,
CK_90:418|cdecc283-7eee-4b39-8319-5096b8a60a28	329	0	329	TRINITY_DN112122_c0_g1_i1	485	122	455	328	1	+	4	263,24,13,29,	0,263,287,300,	122,387,412,426,
CK_94:2083|053efde5-c874-4c6e-8846-1de854da2f36	1998	0	1986	TRINITY_DN16437_c0_g1_i2	2269	13	2066	1986	0	+	2	889,1097,	0,889,	13,969,
CK_102:650|d0217112-83f5-460d-b71c-8b3fe388ced8	544	0	544	TRINITY_DN4202_c2_g1_i6	4931	62	733	539	5	-	2	539,5,	0,539,	62,728,
CK_90:884|411e4844-5c50-43ba-8333-f10837366161	803	0	802	TRINITY_DN1177_c4_g1_i1	3094	454	2883	796	6	+	2	588,214,	0,588,	454,2669,
CK_97:429|d250cc5a-a54c-45f2-ad52-70ccc31c9835	333	0	333	TRINITY_DN20375_c0_g1_i1	958	34	437	332	1	-	3	289,32,12,	0,289,321,	34,374,425,
CK_101:577|4da081b8-eed8-4f93-957f-242c2fbaf28d	473	0	473	TRINITY_DN10843_c1_g1_i3	3977	824	1678	472	1	+	2	103,370,	0,103,	824,1308,
CK_106:2996|5e73d950-d125-413b-a403-aaf0333f8469	2918	1	2916	TRINITY_DN22764_c0_g1_i1	3393	113	3222	2903	7	-	9	5,13,10,7,10,266,34,592,1973,	2,8,22,33,42,52,318,352,944,	113,120,133,143,150,161,572,631,1249,
CK_86:1693|a6da464e-4e79-4331-83c8-f5fa8dd7f7ff	1622	5	1622	TRINITY_DN4202_c2_g1_i6	4931	60	4143	1609	7	-	5	305,213,501,69,528,	0,305,519,1020,1089,	60,366,579,2536,3615,
CK_103:538|5d8b3832-29bd-4086-9536-79851b079300	437	0	437	TRINITY_DN10758_c2_g1_i1	1161	524	963	434	2	-	5	257,38,26,34,81,	0,257,296,322,356,	524,782,820,847,882,
CK_107:415|cdb39b07-90fd-4943-9c34-784a318c8472	315	3	315	TRINITY_DN14530_c1_g1_i3	1930	197	1645	312	0	-	3	6,34,272,	0,6,40,	197,388,1373,
CK_87:2259|66b49f88-3150-459b-9ba4-072e6a4d2685	2179	0	2174	TRINITY_DN1831_c0_g1_i25	4406	6	2908	2170	2	-	4	43,690,710,729,	5,50,740,1450,	6,49,1379,2179,
CK_101:1562|d8adf121-ea01-4d48-bbf1-47e6cc58c855	1456	3	1456	TRINITY_DN18656_c1_g1_i1	1771	145	1661	1450	2	-	2	1215,237,	0,1216,	145,1424,
CK_93:681|440bae91-564f-4a61-961e-dc6d440f6404	588	0	588	TRINITY_DN1243_c4_g1_i1	1040	278	866	585	2	+	3	278,263,46,	0,278,542,	278,557,820,
CK_97:532|ced5ea6f-d70a-4d25-8106-fc57ba20cc4a	445	2	445	TRINITY_DN4566_c0_g1_i2	2303	1847	2303	442	1	+	3	383,33,27,	2,385,418,	1847,2232,2276,
CK_105:777|e8a8194a-0544-4591-ad80-30662dcbf678	667	1	667	TRINITY_DN4609_c0_g1_i7	3286	2293	2973	665	1	+	2	293,373,	1,294,	2293,2600,
CK_98:585|8c9c03d0-f5f2-49b7-8076-cb8469c0d11d	494	2	494	TRINITY_DN28870_c2_g1_i1	901	297	881	491	1	+	2	486,6,	2,488,	297,875,
CK_101:1312|956f057f-d08e-4564-9224-f40cb1e262ee	1219	0	1218	TRINITY_DN444_c0_g2_i1	1568	70	1290	1210	6	-	6	86,755,58,81,206,30,	1,87,842,900,983,1189,	70,157,913,972,1053,1260,
CK_88:325|008067b4-6bd9-4943-a835-51ee2a1ee160	231	0	231	TRINITY_DN18093_c0_g1_i1	1681	194	433	230	0	+	3	53,10,167,	0,54,64,	194,249,266,
CK_85:683|25456a74-0a51-4374-b309-0c110caae624	608	1	608	TRINITY_DN3388_c0_g1_i1	911	46	899	604	3	+	4	8,123,50,426,	1,9,132,182,	46,55,357,473,
CK_100:381|a396f836-a2c5-47f2-8604-3200868de84c	281	0	281	TRINITY_DN69291_c0_g1_i1	1447	1162	1445	279	1	-	3	66,118,96,	0,67,185,	1162,1230,1349,
CK_106:552|e79cc178-f4dd-4cbb-a911-1361010285b3	450	0	450	TRINITY_DN8195_c0_g1_i1	830	7	475	447	3	-	3	28,10,412,	0,28,38,	7,52,63,
CK_87:727|efba7ae2-6ba3-445b-a56b-63264ee978de	651	0	651	TRINITY_DN3285_c1_g1_i3	3612	998	2357	646	3	+	6	145,114,250,6,118,16,	0,146,261,511,517,635,	998,1143,1259,1511,2219,2341,
CK_86:827|34ffb255-9120-4489-819f-f5d0f00a7eee	747	0	747	TRINITY_DN134732_c0_g1_i2	1851	86	837	741	1	-	9	41,10,174,24,23,95,9,66,300,	0,43,53,228,253,276,372,381,447,	86,127,139,316,340,364,459,469,537,
CK_101:571|1f3a0b42-9da2-4a9c-9ac4-541c4fcbef62	468	0	468	TRINITY_DN550_c3_g1_i4	1317	628	1270	465	3	+	2	79,389,	0,79,	628,881,
CK_93:1555|89a2dcfc-27a5-4cf7-aba2-0617ac288ef4	1456	0	1451	TRINITY_DN1071_c3_g1_i1	1814	360	1814	1444	5	+	5	274,182,241,722,30,	0,274,457,699,1421,	360,637,819,1060,1784,
CK_101:1871|b1d4e32b-06d0-4aca-b9ca-28e174c494bf	1804	2	1802	TRINITY_DN21677_c0_g1_i1	1956	64	1864	1799	1	-	1	1800,	2,	64,
CK_57:1078|adc7d9d7-c1c6-4029-a509-0273bb1a0937	1030	0	1029	TRINITY_DN18043_c0_g1_i4	1153	8	1037	1028	1	+	1	1029,	0,	8,
CK_90:748|dd5a12db-797b-451c-9b57-683dfedefcf6	695	0	695	TRINITY_DN24681_c0_g1_i1	1008	0	946	692	3	-	3	6,680,9,	0,6,686,	0,246,937,
CK_93:1441|d696b017-b763-4391-a5bb-53aa4666719b	1351	0	1351	TRINITY_DN482_c2_g1_i1	3296	252	1650	1341	5	+	2	999,347,	0,1004,	252,1303,
CK_90:392|114ee1a5-e310-455c-a5b9-5246ee394334	298	0	298	TRINITY_DN3157_c0_g1_i2	1327	529	1246	298	0	+	2	290,8,	0,290,	529,1238,
CK_106:2806|604c3183-0251-45ee-952e-385b6c4a0a59	2766	2	2766	TRINITY_DN7418_c0_g1_i3	3160	126	3148	2756	8	+	3	604,1323,837,	2,606,1929,	126,841,2311,
CK_91:3011|1ce39cb6-5546-4759-84a1-edea6c08a38f	2941	0	2937	TRINITY_DN22764_c0_g1_i1	3393	113	3220	2930	5	-	5	30,21,261,34,2589,	4,36,57,318,352,	113,143,166,572,631,
CK_88:1351|dba35b42-b855-44c7-9294-8d20e220ce67	1292	0	1292	TRINITY_DN2205_c0_g1_i5	4668	1212	2790	1290	2	-	5	33,54,246,145,814,	0,33,87,333,478,	1212,1321,1404,1703,1976,
CK_96:508|37eaedde-7c50-427c-8597-a506f425bd30	415	0	411	TRINITY_DN1966_c1_g1_i1	731	54	678	411	0	+	5	37,120,35,212,7,	0,37,157,192,404,	54,243,418,458,671,
CK_99:499|e091b946-6438-45f5-9639-86a39d6e880e	408	0	408	TRINITY_DN26736_c0_g1_i2	1856	1297	1774	406	2	+	2	127,281,	0,127,	1297,1493,
CK_95:3905|fca33b98-92b6-41b5-97b9-4c87ff3ab681	3848	0	3845	TRINITY_DN7956_c0_g1_i1	4317	351	4199	3823	18	-	5	92,42,94,3578,35,	3,98,141,235,3813,	351,443,485,581,4164,
CK_91:1310|d97f06a0-1e6e-499a-a06a-0a341031e7bb	1235	1	1231	TRINITY_DN55704_c0_g1_i3	1569	82	1556	1226	4	-	4	285,433,370,142,	4,289,722,1092,	82,370,935,1414,
CK_103:5705|c77b7a07-277f-481b-9c6a-56c02a956b2e	5769	3	5755	TRINITY_DN6647_c0_g1_i1	11865	163	5956	5721	9	+	11	991,633,13,9,11,34,130,148,29,3722,10,	3,996,1629,1643,1656,1668,1709,1842,1994,2023,5745,	163,1154,1788,1801,1817,1833,1882,2021,2176,2209,5946,
CK_92:890|11c21fbf-2e3c-44cb-a1cd-0e869c0e9a9f	809	0	809	TRINITY_DN25391_c0_g2_i1	3867	318	2508	809	0	-	2	399,410,	0,399,	318,2098,
CK_87:767|74a46d38-3d97-41d5-ae6f-ff4b2d1918fd	679	0	676	TRINITY_DN15245_c0_g1_i1	1506	146	1476	676	0	-	2	481,195,	3,484,	146,1281,
CK_107:2200|98d18d94-094b-4943-b64a-cd8179d0d9b6	2099	2	2094	TRINITY_DN2499_c0_g3_i2	2464	323	2416	2090	2	-	2	2053,39,	5,2058,	323,2377,
CK_98:3601|8bc9b451-29bd-44d5-9380-38f20953080b	3530	3	3526	TRINITY_DN2785_c0_g1_i18	3971	223	3845	3497	24	+	4	138,3247,51,85,	3,141,3390,3441,	223,460,3708,3760,
CK_92:517|58ffe0bd-df59-4197-af69-6493b640b607	432	0	432	TRINITY_DN31058_c0_g2_i1	1807	162	593	429	2	+	2	20,411,	0,21,	162,182,
CK_88:324|352b6477-a6c3-417d-8bd7-d991e04a8f6f	235	0	235	TRINITY_DN80_c0_g2_i5	1178	17	431	233	2	-	3	116,5,114,	0,116,121,	17,192,317,
CK_93:475|b6b69738-b242-4ec6-a756-0136a8eb19d3	384	0	384	TRINITY_DN14726_c0_g1_i1	5532	4923	5507	381	1	+	3	215,138,29,	0,215,355,	4923,5336,5478,
CK_89:1070|a52352df-173d-4752-b866-db3b2c22329d	984	0	984	TRINITY_DN38505_c0_g1_i1	1149	13	1061	975	2	-	6	17,19,160,9,581,191,	0,19,40,200,212,793,	13,30,49,210,220,870,
CK_92:2146|fd92129c-556a-4ed9-9187-f257afee6653	2051	0	2050	TRINITY_DN19512_c0_g1_i2	2677	89	2139	2040	2	-	5	43,137,1052,46,764,	1,46,183,1241,1287,	89,132,272,1328,1375,
CK_97:368|4225c51b-66ff-49c5-a667-4dc1ac82e0da	270	0	270	TRINITY_DN46768_c0_g1_i1	661	107	488	268	1	-	4	5,26,58,180,	0,5,32,90,	107,220,248,308,
CK_96:1052|29e1793e-2cec-443d-a789-8da22472cdcd	958	1	957	TRINITY_DN1668_c0_g1_i2	1758	195	1479	956	0	+	3	190,5,761,	1,191,196,	195,387,718,
CK_101:1864|811167ba-2865-4e08-91b8-b72b00ad71e5	1784	4	1784	TRINITY_DN6363_c0_g1_i1	2726	67	2529	1776	4	-	3	688,558,534,	0,688,1246,	67,1020,1995,
CK_93:752|d8de4ade-e240-4c78-ac20-ea971134cd69	651	2	651	TRINITY_DN1958_c1_g2_i4	4744	1178	2313	645	4	+	4	602,10,28,9,	2,604,614,642,	1178,1782,1793,2304,
CK_93:2483|94157c17-25f2-48f5-b3ae-f4a90601f6db	2400	0	2399	TRINITY_DN3006_c0_g1_i7	4414	1624	4018	2381	13	+	3	998,21,1375,	0,999,1024,	1624,2622,2643,
CK_98:712|75fb271a-8e8d-44bf-92ba-e1748414091c	623	0	623	TRINITY_DN40768_c0_g1_i2	1106	78	1093	621	2	+	4	353,4,245,21,	0,353,357,602,	78,465,821,1072,
CK_100:1106|930bddcd-8657-413c-897a-b0ac0e68d37d	1012	2	1012	TRINITY_DN244_c0_g1_i1	2024	92	1170	1006	3	+	2	615,394,	2,618,	92,776,
CK_100:476|772b5284-3d1c-42e8-b65b-3a86b175a993	380	1	380	TRINITY_DN2463_c0_g1_i1	2717	2208	2587	379	0	-	1	379,	0,	2208,
CK_100:1448|a67a0462-e873-4d57-92b4-c216f028c39b	1366	0	1366	TRINITY_DN7943_c0_g1_i2	3038	443	2792	1366	0	-	2	1065,301,	0,1065,	443,2491,
CK_91:1371|a4128146-dd79-4695-890b-94aec032123e	1287	0	1287	TRINITY_DN25088_c0_g2_i1	3221	52	1358	1285	0	-	4	132,17,437,699,	0,133,151,588,	52,184,201,659,
CK_91:922|ac5107d1-e606-4c98-8d96-ad728f59abb0	840	0	840	TRINITY_DN1435_c0_g1_i17	5245	138	5200	839	0	+	4	121,328,5,385,	0,121,449,455,	138,460,4810,4815,
CK_102:1530|a70dea67-8e28-433a-bb20-9ea7738333a8	1447	3	1447	TRINITY_DN3141_c0_g1_i4	4708	22	1466	1438	6	+	1	1444,	3,	22,
CK_88:3849|23ab15c8-b116-47ad-b8d6-1a8e0cdbee55	3781	0	3781	TRINITY_DN2696_c0_g1_i12	11867	39	3862	3770	0	+	3	2910,8,852,	0,2919,2929,	39,2990,3010,
CK_102:1062|d8afe45a-5030-4773-bdca-6b8f1b7b7d13	955	3	954	TRINITY_DN2165_c0_g1_i5	1249	39	1112	948	3	+	2	241,710,	3,244,	39,402,
CK_90:1097|1347f5ef-1ee3-4d07-aaee-d1bd57dd3998	1011	0	1011	TRINITY_DN1497_c0_g1_i4	5059	1243	4974	1003	8	-	2	846,165,	0,846,	1243,4809,
CK_100:1897|0aed6a60-fb0b-4578-978e-0030ca383e8e	1835	8	1832	TRINITY_DN4910_c0_g1_i2	1878	3	1833	1817	2	+	3	7,29,1783,	8,20,49,	3,14,50,
CK_87:779|1c46776c-326f-4d8f-9cae-ebe2ba025548	704	0	700	TRINITY_DN15139_c0_g1_i1	1150	63	1105	697	1	-	2	391,307,	4,397,	63,798,
CK_90:391|22fd0b1c-7a7d-4746-bded-200cf6f4a885	303	0	302	TRINITY_DN7498_c0_g1_i1	3572	557	1127	302	0	+	2	200,102,	0,200,	557,1025,
CK_91:444|405d6051-0109-47cd-9479-e2e12a1b9757	360	0	360	TRINITY_DN75716_c0_g1_i11	1558	957	1530	358	2	+	3	247,101,12,	0,247,348,	957,1345,1518,
CK_95:4032|9a3559a8-bb16-456d-8172-a4dd6c5e9204	3951	3	3936	TRINITY_DN27923_c0_g1_i2	4023	60	3993	3930	3	-	1	3933,	15,	60,
CK_101:1553|4cff8c66-2c48-4abd-ab1c-0d86b419999f	1461	3	1461	TRINITY_DN15115_c0_g1_i1	1558	74	1527	1451	2	+	3	1105,209,139,	3,1109,1322,	74,1179,1388,
CK_89:320|2b24f625-aaf5-45aa-87f6-e092b34e68e7	240	1	240	TRINITY_DN3481_c1_g1_i1	1170	727	1080	238	1	+	3	67,167,5,	1,68,235,	727,800,1075,
CK_88:398|d1c9614b-7616-4a25-9a96-cbbb4fc42b50	320	0	317	TRINITY_DN5245_c0_g1_i1	1770	933	1296	317	0	+	2	245,72,	0,245,	933,1224,
CK_89:468|f7ad0c3c-7918-4e6a-a25f-3fff2b28eaf2	381	0	379	TRINITY_DN2593_c1_g1_i2	1030	8	930	378	0	+	3	64,75,239,	0,65,140,	8,615,691,
CK_99:1110|eee6b458-047a-4c0b-94da-8a9f429fe686	1023	0	1018	TRINITY_DN8687_c0_g1_i3	1704	174	1652	1015	3	+	2	712,306,	0,712,	174,1346,
CK_112:1876|f8bee648-a8df-48ba-945e-52d8dc1cb56b	1783	1	1779	TRINITY_DN550_c1_g2_i1	1917	3	1826	1770	8	-	2	1584,194,	4,1588,	3,1632,
CK_99:1663|657710b6-016d-41ec-aa34-3fd0b17b3059	1576	0	1576	TRINITY_DN7727_c0_g1_i3	2453	381	2274	1571	0	+	4	39,682,750,100,	0,39,721,1476,	381,440,1399,2174,
CK_98:783|a733c09c-537d-4071-b410-d7803bee9e2e	687	0	683	TRINITY_DN11351_c0_g1_i1	2651	1592	2315	682	0	+	4	15,11,16,640,	0,15,27,43,	1592,1608,1619,1675,
CK_93:1724|af94edf3-f7cf-4f4c-8a28-f69676c2eb96	1664	1	1656	TRINITY_DN1012_c0_g1_i1	2163	16	2085	1651	4	-	4	7,425,1097,126,	8,15,440,1537,	16,24,792,1959,
CK_103:1021|0d9460b7-4dac-49dc-816d-75aeac5aba15	903	3	903	TRINITY_DN707_c0_g1_i11	2907	63	1256	896	1	+	3	15,78,804,	3,21,99,	63,78,452,
CK_102:727|4192afa8-2cc9-4c6d-9b98-0187e6a48638	619	0	619	TRINITY_DN3388_c0_g1_i1	911	44	906	613	3	+	5	359,228,6,16,7,	0,359,587,594,612,	44,646,877,883,899,
CK_98:1160|64de26be-0109-4fc7-886a-b6204cfb463f	1070	2	1070	TRINITY_DN3812_c0_g1_i3	1514	115	1266	1064	4	-	3	73,874,121,	0,73,947,	115,205,1145,
CK_107:342|da2ac492-16fa-4634-8d20-6e46c92673aa	242	0	242	TRINITY_DN29246_c0_g1_i4	925	202	688	240	0	-	6	130,17,4,7,4,78,	0,130,147,151,159,164,	202,333,481,596,606,610,
CK_102:611|13fadf46-3897-4044-8947-d95b8cac58c9	519	0	516	TRINITY_DN3141_c0_g1_i4	4708	1901	2527	515	1	+	2	480,36,	0,480,	1901,2491,
CK_88:1005|cba16c5c-bf7a-4db3-bfd0-cc5b76b77bc6	915	3	915	TRINITY_DN4116_c0_g2_i4	2689	11	922	906	4	+	4	30,9,41,830,	3,33,43,85,	11,42,51,92,
CK_54:380|108512b4-cc98-47ab-bb1d-a580bf59f6cc	328	2	328	TRINITY_DN7291_c1_g1_i2	2899	397	1350	325	1	+	3	9,182,135,	2,11,193,	397,409,1215,
CK_88:735|724731ba-fc77-41f8-8901-1aac07cd3076	647	0	647	TRINITY_DN10702_c0_g1_i19	1727	28	900	646	1	-	2	199,448,	0,199,	28,452,
CK_103:389|1ce34500-e4b2-4a84-9019-54aafc785eac	288	0	288	TRINITY_DN8700_c0_g1_i6	2417	30	863	287	1	-	3	6,276,6,	0,6,282,	30,114,857,
CK_105:981|e9fe4515-af3f-40bd-8202-df446b12e0fa	874	3	873	TRINITY_DN3096_c0_g1_i2	3959	2852	3843	868	2	-	2	838,32,	1,839,	2852,3811,
CK_98:967|3b46feb9-80c4-4ff0-ae2d-fe2c6f51677f	870	1	870	TRINITY_DN24347_c0_g1_i6	1885	331	1210	863	2	-	3	410,357,98,	0,414,771,	331,754,1112,
CK_93:397|20442e0e-5bf8-44e5-bb17-78777e31fe83	305	0	305	TRINITY_DN1252_c2_g1_i4	5112	339	1269	302	3	-	2	29,276,	0,29,	339,993,
CK_91:1495|b63d7ef3-2f44-4d01-baca-1c46d8fc1e2e	1411	0	1405	TRINITY_DN1342_c0_g1_i6	3151	50	1699	1398	7	-	4	481,286,615,23,	6,487,773,1388,	50,609,1054,1676,
CK_93:2173|56ebfd9b-72ca-4a65-b4b5-e274c03af758	2121	16	2121	TRINITY_DN12684_c0_g1_i1	2685	330	2656	2105	0	+	2	2098,7,	16,2114,	330,2649,
CK_89:1555|4a9b0b2d-2dcc-4d7b-be4b-47bcad6b2f92	1469	0	1464	TRINITY_DN10444_c0_g1_i3	2320	151	2073	1459	5	-	3	1045,263,156,	5,1050,1313,	151,1197,1917,
CK_105:1603|a55889a9-7092-411d-afba-e82f565147e7	1513	3	1508	TRINITY_DN664_c0_g1_i6	3291	158	3171	1501	3	-	3	685,8,811,	5,691,699,	158,843,2360,
CK_91:407|7df64527-b0b3-4e68-9dc8-6f893cbd1319	313	0	313	TRINITY_DN81333_c0_g1_i1	3560	0	457	310	3	-	2	307,6,	0,307,	0,451,
CK_91:2228|64f62386-2176-4418-9e42-8ce7e8121142	2156	5	2152	TRINITY_DN2861_c0_g1_i11	2711	64	2711	2138	3	+	4	1080,1048,6,7,	5,1085,2135,2145,	64,1643,2691,2704,
CK_99:2264|10c203da-fb97-43bb-8719-65b7397a16f7	2235	0	2235	TRINITY_DN9413_c0_g1_i1	2329	69	2314	2231	4	+	3	1168,1058,9,	0,1168,2226,	69,1243,2305,
CK_90:2545|81c5d83f-1c1d-4e76-9d02-c61c2bf0ae3a	2479	11	2479	TRINITY_DN771_c0_g1_i6	2864	0	2820	2465	3	+	2	1777,691,	11,1788,	0,2129,
CK_98:1522|d2c52f0e-b4cb-4d98-b259-340aa69b7256	1457	0	1452	TRINITY_DN4824_c0_g2_i2	2009	74	1829	1444	5	+	3	1200,168,81,	0,1202,1371,	74,1580,1748,
CK_93:599|dacf393c-d60f-4291-9ce5-fa656a1d16a6	508	0	508	TRINITY_DN2268_c3_g1_i4	1896	957	1522	504	4	+	2	503,5,	0,503,	957,1517,
CK_105:819|36123c3f-9a58-46bc-93d2-a0559227fc96	715	0	715	TRINITY_DN5232_c0_g1_i78	2591	12	1727	712	3	-	7	184,19,114,160,29,145,64,	0,184,203,317,477,506,651,	12,210,231,849,1010,1040,1663,
CK_98:2100|980589c8-c964-41c7-af34-6b18b54d7262	2020	1	2016	TRINITY_DN2641_c0_g1_i11	2882	10	2717	2003	12	+	3	926,741,348,	1,927,1668,	10,955,2369,
CK_98:2216|139bbba6-bd6c-4b4d-9fad-4b234b39d25d	2111	0	2111	TRINITY_DN7776_c0_g1_i4	15823	127	2251	2095	10	-	11	91,96,13,210,232,26,35,34,4,739,625,	0,91,187,200,410,642,669,706,741,747,1486,	127,221,318,332,543,777,803,844,878,885,1626,
CK_99:352|82e41e0f-6c84-453b-ab1e-8b0b15166cf9	252	0	252	TRINITY_DN27283_c0_g1_i1	416	45	415	250	1	-	4	5,25,214,7,	0,5,31,245,	45,168,193,408,
CK_98:677|eb13d88f-b67d-499d-b0dc-903c66aafee7	577	0	577	TRINITY_DN3496_c2_g1_i5	2438	1439	2309	573	4	+	2	452,125,	0,452,	1439,2184,
CK_108:330|e202c6c4-e2fd-4424-b2eb-ea55b66144f6	226	1	226	TRINITY_DN5070_c0_g1_i5	2974	814	1144	225	0	+	2	219,6,	1,220,	814,1138,
CK_95:1413|4a2f18b9-dbda-4c6c-aa0f-7a58e77cda15	1304	1	1300	TRINITY_DN7628_c0_g1_i1	2003	383	1898	1295	2	-	5	59,35,621,335,247,	4,65,100,721,1056,	383,446,483,1206,1651,
CK_104:855|e9327b43-6def-4bda-8ff8-ed19a421ee71	756	1	756	TRINITY_DN761_c0_g1_i1	2041	99	1145	749	5	-	3	77,403,274,	0,78,481,	99,190,871,
CK_99:2551|f073608e-4f0c-442b-9222-e51da4f1efab	2480	3	2480	TRINITY_DN14607_c0_g1_i3	2889	5	2479	2465	9	-	2	2206,268,	0,2209,	5,2211,
CK_94:1189|0316511d-4b86-4ad4-a30b-7cb44249d447	1112	0	1106	TRINITY_DN442_c1_g1_i1	2212	619	2194	1102	4	+	2	1082,24,	0,1082,	619,2170,
CK_95:794|d759434f-e031-4587-a00f-773abd8efa1e	703	2	703	TRINITY_DN3111_c0_g1_i4	3051	44	810	697	4	+	2	306,395,	2,308,	44,415,
CK_91:596|7feb1839-66d9-41ea-8908-11dc8296a4b3	503	0	500	TRINITY_DN1016_c2_g1_i4	4822	2910	3781	499	0	-	3	217,60,222,	3,221,281,	2910,3127,3559,
CK_101:598|c13359e0-9c2c-40eb-95b5-ee404326f8ca	518	1	517	TRINITY_DN5595_c0_g2_i1	1719	291	1648	516	0	-	2	297,219,	1,298,	291,1429,
CK_99:566|66543ed1-1ba4-4a20-ad0a-c35db896ec6b	486	2	486	TRINITY_DN46374_c0_g1_i1	767	221	711	482	0	+	4	71,382,18,11,	2,73,456,475,	221,300,682,700,
CK_99:307|10d969af-2ebd-4318-96ca-eb6f3b9d051d	211	0	211	TRINITY_DN1153_c0_g1_i7	2528	2105	2523	211	0	+	3	76,126,9,	0,76,202,	2105,2182,2514,
CK_104:2267|0cde48a3-91d1-4821-aa7f-313843cb708d	2180	2	2176	TRINITY_DN6226_c0_g1_i19	3348	11	3094	2163	11	+	8	624,293,101,35,58,75,158,830,	2,626,919,1020,1055,1113,1188,1346,	11,640,1051,1543,1692,1871,2022,2264,
CK_92:3602|37e6b6c9-fc5d-4e17-aebc-7924a29c835b	3533	0	3529	TRINITY_DN2319_c0_g1_i2	5372	1010	5239	3498	25	-	5	1298,1607,252,3,363,	4,1302,2912,3165,3170,	1010,3010,4621,4873,4876,
CK_95:506|44118d84-504b-43be-b46b-e6c49dd26c84	419	0	418	TRINITY_DN599_c5_g1_i1	1289	8	593	418	0	-	2	87,331,	1,88,	8,262,
CK_86:389|f94b2a0f-48b7-48d3-aaf9-38c7ec122ad2	307	0	307	TRINITY_DN179392_c0_g1_i1	1102	625	933	304	2	+	3	244,14,48,	0,244,259,	625,871,885,
CK_95:1087|3e8ad1eb-c219-47c8-a0c6-54ba3710a2b4	1002	0	996	TRINITY_DN7331_c0_g1_i5	1275	11	1251	992	4	-	3	435,503,58,	6,441,944,	11,678,1193,
CK_95:2726|1e9336bd-e342-4108-8e81-26f18bdddd76	2648	0	2640	TRINITY_DN1145_c1_g1_i2	2769	131	2769	2622	10	+	5	123,21,2386,5,97,	0,126,147,2537,2543,	131,254,276,2667,2672,
CK_86:437|dee4650f-db84-48f3-92be-f21135218f69	353	2	353	TRINITY_DN6097_c5_g1_i1	1135	237	667	351	0	-	2	5,346,	0,5,	237,321,
CK_91:300|2be90adf-b0b3-4fe6-936f-b9646b82929b	207	0	207	TRINITY_DN32034_c0_g2_i1	641	227	433	205	1	-	2	49,157,	0,50,	227,276,
CK_112:1234|d30601b4-7408-4e45-89dd-b3063e486999	1119	1	1119	TRINITY_DN9039_c0_g4_i1	1287	59	1268	1115	0	+	3	613,15,487,	1,614,632,	59,765,781,
CK_88:2099|009e949f-ee37-4aea-abc0-40f09f5c3cf0	2021	0	2021	TRINITY_DN906_c0_g2_i1	2086	34	2056	2009	7	-	4	38,31,410,1537,	0,42,73,484,	34,77,109,519,
CK_104:1143|c79c913f-529b-4a33-85ae-d3d285a285b3	1042	2	1042	TRINITY_DN33631_c0_g2_i2	1738	55	1317	1037	3	-	5	242,463,122,193,20,	0,242,705,827,1020,	55,298,763,1006,1297,
CK_86:828|f4186868-465e-45b8-b636-27d197c5e24f	745	1	744	TRINITY_DN9661_c0_g1_i7	2522	66	2421	738	5	+	3	554,17,172,	1,555,572,	66,1405,2249,
CK_101:1150|fb7ce5ca-e0ce-41b0-8046-c5305f57a929	1064	2	1064	TRINITY_DN9053_c0_g2_i21	5515	1823	2895	1056	2	+	10	58,555,9,12,4,85,104,116,10,105,	2,61,617,626,638,642,727,831,949,959,	1823,1883,2440,2450,2464,2469,2557,2662,2779,2790,
CK_99:2405|3a340901-a04f-4ef8-865d-21e9aaf164f1	2322	2	2320	TRINITY_DN3410_c0_g1_i1	2398	72	2390	2316	2	-	1	2318,	2,	72,
CK_99:1919|83f354da-113d-4a8e-9ad2-2cf0c1c8b432	1817	0	1812	TRINITY_DN8151_c0_g1_i2	1824	8	1816	1806	2	-	3	5,29,1774,	5,11,43,	8,13,42,
CK_93:861|81b33d37-4db0-4541-b443-8cf67bc40bb8	786	0	786	TRINITY_DN334_c0_g1_i8	2842	29	811	780	2	-	2	57,725,	0,61,	29,86,
CK_44:1613|992d6d22-f086-436e-ab42-27c9784df5b0	1575	0	1572	TRINITY_DN11186_c0_g1_i31	1910	200	1848	1562	4	+	8	167,320,147,409,396,67,18,42,	0,171,492,639,1048,1444,1512,1530,	200,374,694,842,1322,1720,1787,1806,
CK_53:381|bb8f7a9b-a0b4-4960-8955-54a91484acfa	323	0	323	TRINITY_DN12635_c0_g1_i2	885	44	811	322	1	-	4	153,3,160,7,	0,153,156,316,	44,199,204,804,
CK_84:656|5a7c6109-8b99-4cb5-b09f-1d8e92753734	583	0	578	TRINITY_DN14073_c0_g1_i1	881	54	759	578	0	-	3	4,567,7,	5,9,576,	54,59,752,
CK_97:1684|f3bc909d-1243-496e-bab4-8d7b5c71c66c	1586	4	1585	TRINITY_DN430_c0_g3_i2	1912	26	1784	1578	2	-	3	1433,15,132,	1,1435,1450,	26,1459,1652,
CK_88:402|9dcc8347-13ed-4b81-8569-006a20307071	315	0	315	TRINITY_DN2269_c2_g1_i18	2137	1724	2048	312	3	+	5	6,65,163,13,68,	0,6,71,234,247,	1724,1736,1802,1966,1980,
CK_93:629|d9b92169-4875-4f7b-b311-8d9786b95736	537	0	536	TRINITY_DN13461_c0_g1_i5	1969	90	1436	535	1	-	2	115,421,	1,116,	90,1015,
CK_106:511|e82df74b-a5a9-4473-bacb-6ccc107ecc38	405	0	405	TRINITY_DN3314_c0_g1_i2	1305	884	1289	401	2	+	4	364,10,4,25,	0,365,376,380,	884,1248,1258,1264,
CK_97:420|f0e7fcde-1eb8-4f1a-8f1f-94f7cfceb54b	325	0	325	TRINITY_DN14585_c0_g1_i3	5649	980	3114	322	3	+	2	205,120,	0,205,	980,2994,
CK_101:3251|11eb4d27-9230-4ac1-a6ae-76f0aca41250	3153	3	3153	TRINITY_DN4617_c0_g1_i1	3640	15	3586	3143	5	-	3	29,449,2670,	0,31,480,	15,45,916,
CK_96:2347|d98e7866-7fbb-49b3-837f-76d4693abbd5	2250	0	2244	TRINITY_DN7644_c0_g1_i8	3005	15	2997	2235	5	+	5	21,1458,734,9,18,	0,22,1482,2217,2226,	15,36,2233,2967,2979,
CK_92:2321|00297279-3a68-4b02-a4ca-7d429fb91d9d	2242	0	2241	TRINITY_DN25082_c0_g1_i10	2954	74	2931	2226	15	+	3	244,1540,457,	0,244,1784,	74,572,2474,
CK_86:1239|fa94b3c5-f80e-4b28-b44e-94f9f9691daa	1160	0	1159	TRINITY_DN6679_c0_g1_i13	2470	447	2171	1152	5	+	5	247,3,644,214,49,	0,247,251,895,1110,	447,1169,1172,1908,2122,
CK_105:356|3bacd9e3-f2b5-4bea-bbf0-f18bbcca99ca	251	0	251	TRINITY_DN29571_c0_g1_i4	3686	2753	3009	249	2	+	3	5,22,224,	0,5,27,	2753,2759,2785,
CK_98:978|3b2c5aa6-bee7-4935-b809-577a407d3282	880	0	879	TRINITY_DN3143_c0_g1_i5	1156	98	1050	876	3	+	2	259,620,	0,259,	98,430,
CK_93:868|7da17446-b82d-4cec-946f-53a9d430a06d	788	0	783	TRINITY_DN617_c0_g1_i3	4838	3892	4673	781	0	+	2	718,63,	0,720,	3892,4610,
CK_86:669|c41d081e-2f24-4356-af8b-f5d219fb6d0a	580	0	579	TRINITY_DN1389_c2_g1_i4	6615	2986	5594	579	0	+	2	480,99,	0,480,	2986,5495,
CK_101:798|774958b3-532a-4217-9a59-4d26a2a1f82a	705	0	703	TRINITY_DN7601_c0_g1_i1	1232	101	839	699	4	-	2	48,655,	2,50,	101,184,
CK_87:502|96afcbb8-910d-4bda-8c11-d65e60cabdc4	415	0	415	TRINITY_DN25730_c0_g1_i1	1011	141	562	413	2	+	7	41,59,18,126,19,7,145,	0,41,100,118,244,263,270,	141,183,243,262,389,409,417,
CK_99:855|29891465-cda2-4308-997a-bcd52d7d9dd2	749	3	748	TRINITY_DN8089_c0_g1_i1	1776	13	1721	742	1	-	4	142,549,29,23,	1,143,694,723,	13,1112,1661,1698,
CK_106:558|38882f20-2efe-41f7-b2c5-269ccf1315dd	455	0	454	TRINITY_DN5027_c2_g1_i49	3600	2607	3067	451	1	-	8	5,4,40,20,41,27,134,181,	1,6,10,50,70,111,140,274,	2607,2613,2618,2659,2681,2723,2751,2886,
CK_83:1909|2452dafa-db3b-4e28-a409-47e1660f72ac	1822	3	1822	TRINITY_DN1386_c0_g1_i4	3313	1460	3279	1807	6	-	3	163,1638,12,	0,163,1807,	1460,1624,3267,
CK_100:3318|78f98bee-36eb-4e42-907d-b60dfa140347	3241	2	3239	TRINITY_DN5659_c0_g1_i6	6436	48	3299	3226	10	+	5	38,97,6,14,3081,	2,40,137,144,158,	48,87,186,203,218,
CK_102:445|cbe72dd1-00e5-468e-af30-0830ea86676a	358	0	358	TRINITY_DN18926_c0_g1_i1	825	45	411	356	1	-	4	305,20,17,15,	0,306,326,343,	45,352,375,396,
CK_93:338|2ae44e13-5fb0-4aa3-b23f-d66916c5a482	245	0	245	TRINITY_DN43678_c0_g2_i1	1803	280	529	244	1	-	4	56,34,47,108,	0,56,90,137,	280,338,373,421,
CK_55:1600|02100537-6d3c-4fc6-a495-facbddb65feb	1543	1	1540	TRINITY_DN301_c4_g1_i2	1691	128	1668	1537	1	+	2	36,1502,	1,38,	128,166,
CK_94:1228|b02345c1-3000-4665-a444-c1b2737fac50	1148	0	1148	TRINITY_DN3132_c0_g1_i2	1379	157	1355	1146	1	+	4	726,342,69,10,	0,726,1069,1138,	157,900,1242,1345,
CK_85:1118|764b7ea1-80eb-4087-8628-843a6a8a5ae0	1040	3	1036	TRINITY_DN465_c0_g1_i34	2403	667	1905	1031	2	-	2	943,90,	4,947,	667,1815,
CK_82:306|e9ccd67c-6dfb-4409-a2f8-f9204ca19575	229	0	229	TRINITY_DN559_c0_g1_i3	2010	1367	1841	229	0	+	2	222,7,	0,222,	1367,1834,
CK_96:674|7175833c-bc3c-4397-b6b7-8740a1c37ed7	589	0	589	TRINITY_DN466_c0_g3_i2	1628	1003	1594	585	4	-	3	396,117,76,	0,396,513,	1003,1400,1518,
CK_100:870|f2a77ab8-ed79-4c87-95f0-083e9934dbc1	791	2	789	TRINITY_DN1153_c1_g2_i1	1795	866	1665	786	1	+	2	152,635,	2,154,	866,1030,
CK_86:790|d50d638e-d101-48aa-ae3e-167e75557a61	716	0	713	TRINITY_DN1490_c2_g1_i1	3821	102	835	713	0	-	4	472,52,5,184,	3,475,527,532,	102,580,634,651,
CK_101:733|ddb5ee7f-41f2-4227-907e-f51a51ac5c28	628	1	628	TRINITY_DN108741_c0_g1_i1	707	58	686	622	5	-	2	151,476,	0,151,	58,210,
CK_101:618|077f7bd9-b7bd-4d3c-9f07-d426bc4c51ec	520	1	520	TRINITY_DN47295_c0_g1_i7	1974	1453	1971	515	3	+	2	418,100,	1,420,	1453,1871,
CK_103:3113|52371a1f-4b55-4e42-88a9-80bcee91e02e	3040	1	3040	TRINITY_DN6771_c0_g1_i18	4231	4	3771	3031	7	-	4	46,69,1030,1893,	0,46,116,1146,	4,51,120,1878,
CK_84:919|20166515-7a2a-4ae8-9810-98718e5d7fff	854	0	850	TRINITY_DN1149_c4_g1_i1	1538	132	1096	848	2	-	3	134,540,176,	4,138,678,	132,268,920,
CK_106:661|f5545a63-cf7a-4bc7-b3db-82de424df3a7	560	0	560	TRINITY_DN683_c2_g2_i3	1826	152	1743	558	2	+	2	52,508,	0,52,	152,1235,
CK_99:344|bd421046-5901-4153-8b16-443d2ff920fe	249	0	248	TRINITY_DN744_c2_g1_i4	1433	1065	1366	247	1	+	2	134,114,	0,134,	1065,1252,
CK_100:1850|1e217d7e-2ba1-43a6-bfc0-5dc14166a482	1744	2	1738	TRINITY_DN6973_c0_g1_i11	2034	29	1874	1729	3	-	3	225,605,902,	6,235,840,	29,265,972,
CK_106:978|5199c0c1-dc02-4773-94f3-916ffbd4d76a	876	3	876	TRINITY_DN843_c0_g1_i3	2779	27	1791	873	0	+	4	463,359,4,47,	3,466,825,829,	27,934,1406,1744,
CK_97:2024|d9b89169-9ac3-436b-9ca6-d73733220787	1940	0	1935	TRINITY_DN259_c0_g1_i6	3982	536	3963	1927	7	-	8	787,648,3,5,367,57,58,9,	5,792,1440,1443,1448,1815,1873,1931,	536,1380,2030,2035,3381,3838,3895,3954,
CK_113:916|a9095541-24ce-48ff-8c8a-2c0c720a6eae	823	1	823	TRINITY_DN3462_c0_g1_i8	3250	2178	3204	821	1	+	4	561,232,11,18,	1,562,794,805,	2178,2827,3060,3186,
CK_78:2691|0cc3a6fa-391f-4f79-94d5-9c1b4c1ff82c	2615	0	2605	TRINITY_DN58_c0_g1_i6	3583	379	3298	2601	4	+	5	93,201,289,29,1993,	0,93,294,583,612,	379,473,677,1086,1305,
CK_92:1739|798b4acf-3900-4eaf-b36b-9372dea1ccb6	1664	1	1663	TRINITY_DN1160_c2_g1_i1	2302	459	2124	1658	2	-	4	18,1595,4,43,	1,20,1616,1620,	459,479,2074,2081,
CK_114:367|99291c1d-6279-47e1-b249-a09c9b337839	253	0	253	TRINITY_DN8127_c0_g1_i1	1215	772	1026	252	0	+	4	79,34,61,78,	0,79,113,175,	772,852,887,948,
CK_90:856|9e50a275-0ca7-4976-ae46-d0dcb78f76ee	763	0	759	TRINITY_DN83329_c0_g1_i1	1108	182	948	757	2	-	5	431,285,9,5,29,	4,435,720,729,734,	182,615,902,913,919,
CK_88:567|e7d1ae65-1048-443d-a56e-6509c4e3da91	481	0	481	TRINITY_DN6755_c1_g1_i6	2716	855	2594	481	0	+	5	5,68,108,295,5,	0,5,73,181,476,	855,900,1647,2034,2589,
CK_103:400|980ea043-3acf-4d18-9ebc-d16f4b53d576	296	0	296	TRINITY_DN39914_c0_g3_i3	3047	100	576	294	2	+	2	290,6,	0,290,	100,570,
CK_109:391|5baaaa3d-84c6-4474-a7c5-6c2b2afcfca0	281	2	281	TRINITY_DN38828_c0_g1_i1	1437	1052	1332	279	0	+	2	271,8,	2,273,	1052,1324,
CK_104:704|e103c43e-96cb-41a5-bd41-34b341fb0eb1	600	0	600	TRINITY_DN24930_c0_g1_i2	4588	2716	3317	596	3	+	4	250,132,35,182,	0,250,382,418,	2716,2967,3100,3135,
CK_105:887|2baaa95c-3f42-494c-aac4-ced6c1bf06c6	780	3	780	TRINITY_DN3388_c0_g1_i1	911	42	898	774	3	+	2	231,546,	3,234,	42,352,
CK_91:301|710a7851-21d3-4d0d-96a5-14c22adc68b2	212	0	211	TRINITY_DN17619_c0_g1_i2	1439	972	1348	211	0	+	2	162,49,	0,162,	972,1299,
CK_108:829|b1d3496b-358c-45e3-87db-ca124b0765ce	719	3	719	TRINITY_DN2598_c0_g1_i3	1129	129	1119	714	2	+	3	332,366,18,	3,335,701,	129,708,1101,
CK_90:1346|c179cb31-bd90-4e57-96dd-97fcc90f10c8	1261	0	1254	TRINITY_DN15245_c0_g1_i1	1506	202	1501	1254	0	-	2	796,458,	7,803,	202,1043,
CK_102:325|a538df2c-7a25-4646-a94a-2351c2288aa3	223	0	223	TRINITY_DN118371_c0_g1_i1	391	149	372	221	2	+	1	223,	0,	149,
CK_101:1060|89a40038-dfbc-4180-a6ad-894c3745e3bd	964	0	964	TRINITY_DN3509_c0_g1_i3	1277	198	1162	955	7	-	4	812,124,19,7,	0,812,938,957,	198,1011,1135,1155,
CK_102:1042|819bcdf3-573c-4912-ace2-f0458427b434	952	1	952	TRINITY_DN3812_c0_g1_i3	1514	21	1266	945	6	-	3	690,140,121,	0,690,830,	21,939,1145,
CK_103:934|2df8ca96-35fa-413c-b827-53d44d20b5a8	839	3	839	TRINITY_DN2205_c0_g1_i5	4668	1519	4644	834	2	-	6	7,119,173,4,467,66,	0,7,126,299,303,770,	1519,1729,1976,2167,4109,4578,
CK_101:392|5bed9a5a-1e8e-4a56-9641-9b789c8ffedf	292	0	292	TRINITY_DN25591_c0_g1_i2	2107	1195	1487	292	0	-	1	292,	0,	1195,
CK_102:356|5332b2ad-4fa0-4d59-816b-25ee15269b6d	275	0	275	TRINITY_DN2650_c0_g1_i1	2936	0	274	273	1	-	2	13,261,	0,14,	0,13,
CK_99:993|cd2d6052-891f-4be8-b391-d31138126774	891	2	891	TRINITY_DN3545_c0_g1_i1	1176	61	973	886	2	+	3	66,4,818,	2,68,73,	61,128,155,
CK_86:490|3d100abb-2ab3-4419-8732-71861ec59232	408	3	408	TRINITY_DN2598_c0_g1_i3	1129	129	1075	405	0	+	2	323,82,	3,326,	129,993,
CK_90:633|871cb457-10d1-482b-b6ae-7720c1067a2c	545	1	545	TRINITY_DN1875_c0_g3_i1	2962	1171	1871	543	1	-	3	24,259,261,	0,24,283,	1171,1201,1610,
CK_102:728|c5d4af56-009c-4ee9-94df-03a6d241ee59	637	2	636	TRINITY_DN108741_c0_g1_i1	707	50	686	631	2	-	3	597,26,10,	1,598,625,	50,648,676,
CK_96:330|9248c0a0-c3b5-4071-82b5-b1277202e02f	237	0	237	TRINITY_DN84577_c0_g1_i1	383	32	270	236	1	+	2	37,200,	0,37,	32,70,
CK_88:1908|779df753-8249-40f8-9542-4f7b59af673e	1828	1	1828	TRINITY_DN5631_c2_g1_i9	2084	109	1939	1810	14	+	5	129,56,15,1551,73,	1,133,189,204,1755,	109,238,296,314,1866,
CK_99:2929|2cd37e65-177f-4beb-b32c-5cd03962baaa	2953	1	2950	TRINITY_DN5114_c0_g1_i1	6194	82	3039	2932	2	+	6	2341,452,87,26,10,18,	1,2343,2795,2882,2919,2932,	82,2423,2876,2964,3007,3021,
CK_98:1427|c5b9230c-e504-427a-a879-05e21ec6b7f9	1337	0	1336	TRINITY_DN10735_c0_g1_i4	2151	37	1689	1324	12	+	3	120,1108,108,	0,120,1228,	37,437,1581,
CK_98:814|002bfa54-823f-45d6-b234-be94651225c5	714	0	711	TRINITY_DN7463_c1_g1_i1	2599	1245	2559	708	3	+	2	174,537,	0,174,	1245,2022,
CK_91:323|dad58625-0624-4194-ae83-f5109b0e6f2c	236	0	236	TRINITY_DN27392_c0_g2_i1	685	112	678	234	0	-	4	193,18,16,7,	0,193,213,229,	112,308,326,671,
CK_91:776|f525cec5-f549-4299-a61c-fb857d0ac038	693	0	693	TRINITY_DN419_c0_g1_i3	2610	1618	2374	690	3	+	2	347,346,	0,347,	1618,2028,
CK_98:3366|76fc7c16-3e2e-4f9b-b3a6-229b302d41b5	3256	4	3241	TRINITY_DN1831_c0_g1_i25	4406	560	4348	3227	10	-	3	174,2134,929,	15,189,2323,	560,1284,3419,
CK_94:1766|a8ad0e83-4877-4351-a0ea-4892b815878e	1695	0	1692	TRINITY_DN489_c0_g1_i7	2450	134	2343	1686	6	-	3	929,448,315,	3,932,1380,	134,1113,2028,
CK_94:1062|4f255151-67c7-4db2-af84-8ee5fd77b80a	982	2	982	TRINITY_DN1469_c0_g1_i19	1689	11	1682	974	6	+	6	122,68,106,39,67,578,	2,124,192,298,337,404,	11,141,211,428,855,1104,
CK_89:374|a5c565eb-bf82-4fc2-bfa7-43940a7d14ad	285	0	285	TRINITY_DN2185_c1_g2_i4	1057	13	488	284	1	-	2	106,179,	0,106,	13,309,
CK_88:554|d999058c-5b3b-4aee-925b-8080b249dc4e	460	0	456	TRINITY_DN12081_c0_g1_i4	982	205	912	456	0	-	2	343,113,	4,347,	205,799,
CK_89:959|56b3e515-cd89-439e-8e8a-0f3858cea423	879	0	876	TRINITY_DN2671_c2_g1_i1	3079	74	3071	873	3	-	2	583,293,	3,586,	74,2778,
CK_106:477|83aed658-74d7-4817-ba34-2d98a9aaf8d0	374	0	374	TRINITY_DN11274_c0_g1_i1	2379	95	981	374	0	-	2	286,88,	0,286,	95,893,
CK_111:827|072c05a9-0b51-40ef-9216-4f4b42f64bd0	724	0	720	TRINITY_DN5388_c0_g1_i1	3328	2267	2986	719	0	+	2	564,155,	0,565,	2267,2831,
CK_102:1178|36eff2be-5b21-4b6e-a60b-22e23f099d7c	1082	0	1082	TRINITY_DN54910_c0_g1_i2	3521	956	2039	1073	3	+	9	212,39,35,6,21,251,202,234,76,	0,212,252,289,295,317,568,771,1006,	956,1169,1208,1244,1253,1274,1527,1729,1963,
CK_97:858|b83f3b47-8f29-4e6f-bd3f-4966d41acba3	777	0	774	TRINITY_DN918_c1_g1_i1	986	184	975	770	3	+	4	597,16,111,49,	0,597,614,725,	184,792,810,926,
CK_102:909|22e41188-b8f2-4111-956e-e36a92725caf	807	1	804	TRINITY_DN1541_c0_g1_i3	1520	70	1512	800	3	+	3	99,52,652,	1,100,152,	70,172,860,
CK_90:2624|935367e3-79e8-4481-b504-152961571c81	2536	3	2526	TRINITY_DN1426_c0_g1_i4	2876	49	2672	2513	3	-	5	52,93,13,356,2002,	10,66,162,175,531,	49,107,204,219,670,
CK_95:374|483f2c92-3fc7-4154-acdf-65b73d980696	280	0	280	TRINITY_DN1281_c0_g1_i5	3800	3407	3687	278	2	+	1	280,	0,	3407,
CK_102:728|c2283cfe-c64f-49ea-8cf5-7c4a6a46f09c	626	0	626	TRINITY_DN16559_c0_g1_i12	3357	2480	3108	620	5	+	2	333,292,	0,334,	2480,2816,
CK_102:1235|fac14d32-64a9-4411-89d2-b6593291aebd	1150	0	1150	TRINITY_DN26143_c0_g1_i7	3199	38	1230	1145	5	-	2	459,691,	0,459,	38,539,
CK_107:6095|f34bffcd-41b2-4f53-876d-9ce2714314ab	6005	2	5964	TRINITY_DN5315_c0_g1_i13	12313	17	6099	5952	10	+	2	3910,2052,	2,3912,	17,4047,
CK_105:1599|5da290ff-a18a-444a-98ea-bf78d75c45b6	1499	2	1498	TRINITY_DN5978_c0_g1_i3	2254	245	2093	1496	0	+	2	1314,182,	2,1316,	245,1911,
CK_91:934|b6c20999-57f6-4bda-9aab-39e8cf38417c	849	0	849	TRINITY_DN630_c1_g1_i2	914	28	881	844	5	-	2	789,60,	0,789,	28,821,
CK_103:1701|77bfc2df-4105-4789-be54-c4dfbc588f15	1596	4	1596	TRINITY_DN2305_c0_g1_i18	2055	19	1778	1585	5	+	4	217,682,333,358,	4,221,903,1238,	19,349,1086,1420,
CK_89:2690|345379f5-3d8d-4488-babd-13a716eb820f	2611	0	2606	TRINITY_DN6727_c0_g1_i1	3005	81	2699	2593	5	-	9	128,28,2193,100,29,35,7,5,73,	5,134,163,2356,2457,2487,2524,2531,2538,	81,209,237,2431,2535,2564,2607,2615,2626,
CK_94:620|cc65152e-f6d7-430c-8982-11eb4f3e2615	530	0	530	TRINITY_DN9775_c2_g1_i1	999	69	623	525	1	+	4	192,75,254,5,	0,193,271,525,	69,261,340,618,
CK_100:365|9c6cea35-610e-4ad2-b807-041d88abf5cc	276	0	276	TRINITY_DN5416_c0_g1_i2	1410	294	1028	275	1	+	2	270,6,	0,270,	294,1022,
CK_84:2270|25aecca4-013c-4447-b709-211cc98efc45	2213	0	2210	TRINITY_DN4566_c0_g1_i2	2303	52	2265	2208	1	+	4	7,2177,15,10,	0,7,2185,2200,	52,61,2238,2255,
CK_105:705|493299c8-64e8-4b74-8b0f-5e2751516d3a	597	2	597	TRINITY_DN2216_c4_g1_i4	2150	1163	2101	592	3	+	3	572,5,18,	2,574,579,	1163,1781,2083,
CK_87:358|8fbdac5a-3832-4752-ae12-158cc2c62f48	273	0	273	TRINITY_DN3394_c1_g1_i1	1008	224	497	271	1	+	3	70,125,77,	0,71,196,	224,294,420,
CK_105:1571|f2e9cb7c-ad5d-4ca6-a39b-fb29bb38ef94	1466	3	1466	TRINITY_DN73_c1_g1_i7	1953	52	1779	1454	4	+	8	5,84,408,230,9,228,486,8,	3,8,92,500,731,741,970,1458,	52,58,183,818,1048,1057,1285,1771,
CK_99:789|dfe3a5cf-5801-4ed6-918f-bc73bfb322ef	689	0	685	TRINITY_DN2948_c0_g1_i4	2338	874	2301	685	0	+	3	519,5,161,	0,519,524,	874,2133,2140,
CK_88:1024|f8f0ed71-97c3-489c-87bf-36bf82155388	946	2	946	TRINITY_DN13867_c0_g1_i3	1191	87	1187	942	2	+	2	459,485,	2,461,	87,702,
CK_104:582|ed076fce-6750-42e8-8817-4807ef25b4a0	478	0	478	TRINITY_DN75725_c0_g1_i1	759	183	672	477	1	+	5	63,61,287,61,6,	0,63,124,411,472,	183,247,309,597,666,
CK_99:2834|90e18d62-5e85-4293-bd5a-f7b506628c5d	2832	13	2829	TRINITY_DN2159_c1_g1_i1	3234	100	3128	2809	5	-	5	12,265,1083,1345,109,	3,16,282,1365,2710,	100,114,379,1465,3019,
CK_90:352|86be71c9-bc48-4662-821d-b7cf04cfffd5	263	0	263	TRINITY_DN2598_c0_g1_i3	1129	759	1127	262	1	+	3	178,59,26,	0,178,237,	759,1014,1101,
CK_87:328|27b69b4a-6c7e-4084-8495-71ce8af7c1dd	253	0	253	TRINITY_DN12354_c1_g1_i1	2218	269	797	252	1	-	2	247,6,	0,247,	269,791,
CK_89:1104|3cc46edc-d63c-4eed-a6f2-789a00dee202	1010	0	1010	TRINITY_DN1676_c0_g1_i3	3063	345	2156	1005	5	+	4	324,625,56,5,	0,324,949,1005,	345,1073,1721,2151,
CK_101:501|1df94b16-875b-4e22-a9cc-21bbd37569c8	400	0	400	TRINITY_DN38702_c1_g1_i1	2177	1	441	398	1	-	7	5,51,115,107,10,99,12,	0,5,57,172,279,289,388,	1,41,94,210,318,329,429,
CK_90:415|e34cead9-d4f2-4c76-a4b6-b3d8a5d00903	337	0	334	TRINITY_DN4486_c0_g2_i1	1141	20	757	334	0	+	3	38,8,288,	0,38,46,	20,458,469,
CK_99:554|dc50bf30-55f6-40a8-97d2-df587018a302	457	0	457	TRINITY_DN17768_c5_g1_i1	569	75	546	454	3	-	2	448,9,	0,448,	75,537,
CK_93:338|d5c4a357-6311-4fd2-9263-cbb2d6c70edf	240	0	240	TRINITY_DN9513_c1_g1_i2	3384	233	475	239	1	-	3	186,49,5,	0,186,235,	233,420,470,
CK_107:931|42ee7caf-d48c-4416-9787-fd9d390d9e7e	830	1	826	TRINITY_DN10824_c0_g1_i1	1544	17	1017	824	1	+	2	88,737,	1,89,	17,280,
CK_104:1095|6a167f95-500e-4a47-914d-ab48fb616f7f	1008	2	1008	TRINITY_DN15778_c0_g2_i2	1158	31	1077	1001	4	-	4	21,773,114,97,	0,22,795,909,	31,89,865,980,
CK_102:352|c4fb251c-ca6e-4868-9fd1-75a5e4a9fc18	250	0	250	TRINITY_DN178391_c0_g1_i1	503	229	482	248	1	-	3	62,6,181,	0,63,69,	229,294,301,
CK_97:331|a122d287-0a21-42ca-b08d-322af523ceda	239	0	239	TRINITY_DN6038_c0_g2_i11	2326	441	1460	237	2	+	3	14,220,5,	0,14,234,	441,874,1455,
CK_108:553|eea40640-a941-4b88-9ae2-c4f392d08ab4	459	0	459	TRINITY_DN3956_c0_g1_i1	4162	1440	2100	455	3	+	3	277,173,8,	0,278,451,	1440,1719,2092,
CK_104:574|e8e302bf-392a-4dcf-a1e0-0d05aff9d33e	472	0	471	TRINITY_DN37958_c0_g1_i3	1923	1254	1742	468	1	+	2	310,159,	0,312,	1254,1583,
CK_100:1370|a730d015-1312-4dc0-b927-657ff58e03a9	1273	3	1273	TRINITY_DN3020_c0_g2_i3	1812	166	1676	1270	0	-	3	570,289,411,	0,570,859,	166,781,1265,
CK_95:1371|709a7b14-892c-4966-b7b1-eec3a91d69d4	1303	0	1302	TRINITY_DN10575_c0_g1_i5	1764	102	1548	1297	4	+	5	613,302,52,323,11,	0,613,915,967,1291,	102,856,1159,1214,1537,
CK_99:2849|7882efd6-b8ab-497e-8704-1067f4532d75	2763	0	2763	TRINITY_DN565_c0_g1_i8	6299	92	2860	2760	0	-	5	136,7,12,25,2580,	0,137,144,157,183,	92,230,239,251,280,
CK_91:1194|54768cb0-0696-43a1-9289-188db58724ce	1103	1	1098	TRINITY_DN2739_c0_g1_i1	1273	63	1227	1093	4	-	3	550,353,194,	5,555,908,	63,660,1033,
CK_98:761|047c869a-1049-4cea-93f0-5bca4fb1f22a	677	0	677	TRINITY_DN2983_c0_g1_i2	873	26	704	672	4	-	4	650,15,6,5,	0,650,666,672,	26,677,692,699,
CK_106:570|e21900e0-71dc-4dc0-8eb4-0072bcf4787f	470	0	470	TRINITY_DN3345_c3_g1_i1	1077	231	711	466	4	+	4	96,285,80,9,	0,96,381,461,	231,329,615,702,
CK_108:1165|d554c9e7-ea77-4482-b0e4-1c5640328180	1074	2	1071	TRINITY_DN1473_c1_g1_i4	1355	176	1332	1069	0	-	2	637,432,	3,640,	176,900,
CK_98:532|1ea7f686-6dad-4d00-82d5-81e6e4d5af03	437	0	436	TRINITY_DN14339_c0_g1_i2	3693	29	467	433	3	-	3	24,198,214,	1,25,223,	29,54,253,
CK_97:1729|36bb5c83-aed5-4617-84ba-37ec8b353204	1648	0	1640	TRINITY_DN3268_c0_g1_i7	4007	0	1981	1639	1	+	3	15,1353,272,	0,15,1368,	0,17,1709,
CK_102:2875|ee83855f-83cc-4490-bfdf-ddfcba6c24d1	2811	7	2805	TRINITY_DN32158_c0_g1_i4	4024	376	4024	2793	5	+	3	872,1239,687,	7,879,2118,	376,1480,3337,
CK_102:2129|95558e34-59ea-4e51-b4ec-f69bdee98e75	2030	2	2027	TRINITY_DN1952_c1_g1_i8	6006	69	5420	2015	6	+	8	1316,15,248,6,246,152,31,7,	2,1319,1335,1583,1589,1835,1988,2020,	69,1385,1404,1653,3767,5230,5382,5413,
CK_90:955|7324054c-acd5-45c8-ac85-c5d36b52bd1d	871	0	871	TRINITY_DN9034_c0_g1_i1	1905	9	926	867	4	-	3	39,650,182,	0,39,689,	9,50,744,
CK_94:1753|64f59bd0-05e1-412b-ad12-dbaea9dca1b5	1670	0	1670	TRINITY_DN11677_c0_g1_i41	4135	342	2021	1658	6	+	11	24,119,140,15,202,5,68,72,946,31,42,	0,24,143,283,303,505,511,579,651,1597,1628,	342,367,488,629,647,850,855,924,997,1946,1979,
CK_95:461|122747a1-9281-4b23-8f45-a1be07cd0571	368	0	368	TRINITY_DN1875_c0_g3_i1	2962	1157	1869	368	0	-	3	18,78,272,	0,18,96,	1157,1509,1597,
CK_98:397|95094962-fad9-407d-82c6-31e915853421	298	1	297	TRINITY_DN25122_c0_g1_i1	473	127	424	296	0	-	2	286,10,	1,287,	127,414,
CK_100:1039|bf9d6c47-6f92-4aeb-a04b-4effe0c82c7e	949	0	948	TRINITY_DN2150_c30_g1_i1	2512	343	2111	946	2	-	4	412,270,4,262,	1,413,683,687,	343,756,1244,1849,
CK_84:7532|dfdf8afd-aa94-4cca-9211-a9d294d4a748	7478	9	7478	TRINITY_DN9417_c0_g1_i1	7955	0	7474	7436	11	+	7	9,7,1197,8,4,1955,4267,	9,21,28,1227,1236,1246,3211,	0,14,22,1220,1228,1241,3207,
CK_104:1905|c2390a92-280f-4c88-b13f-46eb2529361f	1810	0	1809	TRINITY_DN3039_c0_g1_i2	1931	30	1905	1802	7	+	2	1176,633,	0,1176,	30,1272,
CK_104:728|73062353-2e98-4a63-ba24-1a140b079514	628	0	628	TRINITY_DN1896_c0_g1_i5	2074	368	1037	628	0	-	2	340,288,	0,340,	368,749,
CK_104:2131|2ca35292-6253-4a13-8b65-77e945188ce5	2044	2	2044	TRINITY_DN17293_c0_g1_i2	4051	384	3554	2036	6	+	4	1365,286,386,5,	2,1367,1653,2039,	384,2431,3109,3549,
CK_96:701|e6a3a05b-e430-4a52-a240-540976cb9db9	606	0	603	TRINITY_DN13265_c1_g1_i1	2700	22	2609	601	1	-	3	263,6,333,	3,266,273,	22,2268,2276,
CK_103:3904|dd274304-ca5b-47e3-b587-c9a28b9f2795	3803	4	3803	TRINITY_DN6986_c1_g1_i4	3924	95	3910	3797	2	+	2	2414,1385,	4,2418,	95,2525,
CK_447:1200|a1a10f96-c453-4006-af99-21e24db341fa	758	0	758	TRINITY_DN7652_c0_g1_i4	3991	611	2229	757	1	+	4	586,4,163,5,	0,586,590,753,	611,1210,2024,2224,
CK_114:1323|94153f2e-9b57-4067-8194-24d432aee9e1	1213	3	1211	TRINITY_DN6636_c0_g1_i2	1580	263	1568	1206	1	-	2	807,400,	2,810,	263,1168,
CK_88:419|59c6f5a8-aab6-4069-be40-09dc76d41bdc	338	0	337	TRINITY_DN4919_c1_g2_i2	2563	1968	2305	335	2	-	1	337,	1,	1968,
CK_99:3605|19f12cad-daa6-4bfe-be9e-baafd9762f7c	3520	3	3503	TRINITY_DN5631_c0_g1_i5	3683	0	3608	3493	4	-	4	16,7,1582,1892,	17,33,43,1625,	0,31,43,1716,
CK_102:1455|eb828b8f-35f5-488a-b7a5-61d7a3378bff	1359	2	1356	TRINITY_DN9884_c0_g1_i1	1442	8	1357	1347	2	-	2	160,1189,	3,168,	8,168,
CK_100:433|82162e1f-ad62-4896-90d1-b2f822dd22e4	333	0	333	TRINITY_DN68208_c0_g1_i2	1685	12	347	332	1	+	2	292,41,	0,292,	12,306,
CK_89:857|6d2f56d4-c3fa-422c-a793-c06b0e2be6e5	771	0	766	TRINITY_DN8134_c0_g1_i4	2631	1312	2474	765	1	+	2	457,309,	0,457,	1312,2165,
CK_103:339|01d408dc-fb1b-4e05-aad3-772057d557cb	236	1	236	TRINITY_DN174765_c0_g1_i1	674	300	534	234	0	+	2	103,131,	1,105,	300,403,
CK_94:3036|cc712b59-322b-4612-82ed-1dae2e10d14e	2941	3	2925	TRINITY_DN376_c0_g1_i2	2988	46	2969	2914	6	-	3	2639,69,212,	16,2656,2726,	46,2688,2757,
CK_92:894|3e946b80-730e-4fe6-914b-70ec6630c304	802	0	802	TRINITY_DN11912_c1_g1_i3	1967	3	1011	796	6	+	4	22,3,772,5,	0,22,25,797,	3,26,30,1006,
CK_94:435|4c0628ef-4167-4b01-887a-5b0738b07949	341	0	341	TRINITY_DN33920_c0_g1_i1	511	59	464	339	1	+	5	88,79,23,14,136,	0,88,168,191,205,	59,208,289,313,328,
CK_108:803|c16a0053-d652-4f3d-84bb-d57f01ba0aca	696	0	696	TRINITY_DN8926_c1_g1_i4	2015	1063	1973	696	0	+	5	379,173,27,108,9,	0,379,552,579,687,	1063,1446,1620,1648,1964,
CK_103:1776|67437ed7-4e16-4ecc-9739-582422051c94	1693	1	1693	TRINITY_DN1684_c1_g1_i1	2382	132	2241	1682	10	-	3	5,1594,93,	0,5,1599,	132,164,2148,
CK_102:1460|49e2b5ac-fa9b-4e04-a2bf-14c6a882ad94	1369	0	1369	TRINITY_DN118_c0_g1_i2	2519	398	2469	1361	8	+	2	1315,54,	0,1315,	398,2415,
CK_97:1484|f3e5f5c3-bff6-44ed-a33e-36f12359c97a	1420	1	1420	TRINITY_DN475_c0_g1_i7	2905	1314	2903	1406	11	+	5	24,14,1352,19,8,	1,27,41,1393,1412,	1314,1339,1371,2726,2895,
CK_91:2300|30be269b-5bb7-4aa3-b98d-d0e3fa0cac6e	2220	0	2212	TRINITY_DN4477_c0_g1_i1	2285	49	2261	2201	11	+	1	2212,	0,	49,
CK_89:2251|b731dc13-8283-40e5-97f4-f3b73520d49e	2173	0	2172	TRINITY_DN8620_c0_g1_i3	2843	81	2748	2172	0	+	4	773,109,334,956,	0,773,882,1216,	81,989,1193,1792,
CK_91:662|4a456960-7559-4fa6-a1aa-777fe224d2ce	570	0	566	TRINITY_DN10778_c0_g1_i14	2444	1686	2354	566	0	+	2	82,484,	0,82,	1686,1870,
CK_98:4440|ddc06cd0-abd2-42bd-8f1e-92f89dba5e0b	4355	2	4349	TRINITY_DN7913_c0_g1_i3	8411	39	4886	4341	3	+	5	27,3486,733,7,91,	2,30,3516,4249,4258,	39,70,4043,4777,4795,
CK_105:1040|61ad0d6a-1d01-4ff3-bd1d-580a1248c52b	946	2	944	TRINITY_DN7892_c1_g3_i2	1272	24	968	940	2	+	2	87,855,	2,89,	24,113,
CK_109:469|e007e397-b050-4033-844a-3bf825ea4a26	360	0	360	TRINITY_DN156642_c0_g1_i1	1996	1215	1577	357	3	+	2	21,339,	0,21,	1215,1238,
CK_97:1353|20dfdb3a-a12c-44da-af37-d875511e5316	1273	1	1273	TRINITY_DN236_c0_g1_i6	2837	65	2710	1268	4	-	3	453,91,728,	0,453,544,	65,605,1982,
CK_110:666|30cf9fe6-1e37-4e5d-8445-d7d06aa0be58	556	0	552	TRINITY_DN1245_c0_g1_i2	2625	189	1405	551	1	-	2	147,405,	4,151,	189,1000,
CK_90:1292|309454a9-1b4b-4ed7-95d5-a6ffec0cc4b0	1199	1	1199	TRINITY_DN4258_c0_g1_i5	1728	0	1683	1190	3	-	7	73,316,288,59,427,18,12,	0,78,394,682,741,1168,1186,	0,79,613,1079,1224,1652,1671,
CK_103:1291|7cb2893e-e01c-4bae-a9ad-4458db9e0b25	1199	1	1198	TRINITY_DN1684_c1_g1_i1	2382	231	1428	1189	8	-	1	1197,	1,	231,
CK_98:2727|74a5f984-f86e-41d1-a727-d9fdb5ea5820	2639	3	2639	TRINITY_DN14649_c0_g1_i3	3269	6	3134	2629	7	-	2	559,2077,	0,559,	6,1057,
CK_97:558|4b2da678-3a6b-4bc7-8acb-55d5479e1040	459	0	459	TRINITY_DN4488_c1_g1_i1	1700	185	1386	457	2	+	4	122,4,326,7,	0,122,126,452,	185,498,981,1379,
CK_104:1335|00f308ab-b336-4a99-9afe-62fd4baaf53b	1231	1	1230	TRINITY_DN1339_c3_g1_i2	1812	225	1708	1226	3	-	3	410,473,346,	1,411,884,	225,646,1362,
CK_105:915|59352804-6f5a-47d9-b728-ebc65b005af6	821	0	821	TRINITY_DN809_c0_g1_i1	2162	89	1316	816	2	-	6	25,9,530,149,13,92,	0,28,37,567,716,729,	89,120,130,1055,1206,1224,
CK_91:360|edfa545d-db73-484b-97a4-66a55a18c58b	269	0	269	TRINITY_DN21889_c0_g1_i1	1219	934	1202	267	0	+	3	225,33,9,	0,227,260,	934,1159,1193,
CK_115:1290|3c534ac5-4a49-4d99-b232-3e5333961574	1182	1	1182	TRINITY_DN1233_c0_g1_i12	1548	121	1468	1171	2	+	5	32,42,13,88,998,	1,33,76,96,184,	121,154,198,217,470,
CK_91:766|e63ae8c0-3a1c-4be8-b294-0086c582ea23	679	1	679	TRINITY_DN7890_c0_g1_i1	932	18	747	678	0	-	3	573,5,100,	0,573,578,	18,592,647,
CK_82:4150|44636d7c-bae4-45ba-a764-aefb6c6a6748	4166	3	4161	TRINITY_DN7116_c0_g2_i3	4544	131	4370	4147	11	-	2	4074,84,	5,4079,	131,4286,
CK_100:361|0eed3ab4-3534-4198-9459-75db8334fb2a	261	0	261	TRINITY_DN81956_c0_g1_i1	634	222	489	260	1	+	5	40,7,18,107,89,	0,40,47,65,172,	222,263,272,291,400,
CK_88:347|800bb243-c241-4a14-9e49-f6bcac1ee5b8	259	0	259	TRINITY_DN33431_c1_g2_i1	1552	1115	1377	257	2	-	3	21,188,50,	0,21,209,	1115,1137,1327,
CK_95:472|899e5050-33c8-4487-9ddc-9843a1552bfa	380	3	380	TRINITY_DN3198_c0_g2_i1	2703	124	657	377	0	-	2	6,371,	0,6,	124,286,
CK_94:1610|c8409ab0-32c7-4704-98a8-4bba1cb4c31f	1526	6	1523	TRINITY_DN33776_c0_g1_i1	2248	80	1956	1514	3	-	2	417,1100,	3,420,	80,856,
CK_90:1399|2c3781f5-e85a-4bee-a518-9c1cb53d8cb2	1327	10	1327	TRINITY_DN20389_c0_g1_i1	2199	305	1643	1317	0	-	2	932,385,	0,932,	305,1258,
CK_68:2973|0d0ee5d5-14e2-4e53-941d-ae22663d5d6d	2929	3	2927	TRINITY_DN3692_c0_g1_i39	3390	84	3142	2921	2	+	4	31,447,2282,163,	3,35,482,2764,	84,115,692,2979,
CK_103:1715|fcd51c03-50ef-4be2-a807-02d587839110	1607	2	1600	TRINITY_DN1600_c1_g1_i1	5438	3717	5438	1595	3	+	2	106,1492,	2,108,	3717,3946,
CK_102:1164|280c35f1-e57d-4a24-95ad-79c72100b724	1082	2	1082	TRINITY_DN10521_c1_g1_i3	2072	85	1512	1078	2	+	4	5,932,136,7,	2,7,939,1075,	85,91,1197,1505,
CK_105:5825|d44b2172-9035-4cdf-9e91-f9229b1bcdb8	5765	10	5758	TRINITY_DN8125_c1_g1_i2	5859	110	5859	5734	11	-	4	36,5568,133,8,	7,43,5613,5747,	110,147,5715,5851,
CK_104:1803|a055c7b9-49b3-4195-810a-ca4db80d601b	1712	7	1708	TRINITY_DN1269_c0_g1_i18	1864	27	1846	1701	0	-	4	27,25,1213,436,	4,31,56,1269,	27,55,83,1410,
CK_89:1392|6f41723e-6a4c-4cfa-b8b7-e3e3ef05c2f7	1307	0	1304	TRINITY_DN815_c0_g1_i18	2209	114	2051	1296	8	+	4	520,487,104,193,	0,520,1007,1111,	114,1264,1753,1858,
CK_101:480|cf00da39-01e4-472f-a79e-811a101dbba3	384	0	381	TRINITY_DN5144_c1_g1_i2	1854	226	751	381	0	-	2	376,5,	3,379,	226,746,
CK_90:2112|1a67dec4-8a69-4ffb-9925-627e5b58a3f9	2055	7	2052	TRINITY_DN7517_c0_g1_i5	3163	0	2116	2043	2	+	2	1222,823,	7,1229,	0,1293,
CK_97:313|c4212aef-cbe9-4d3d-8c79-c8b19ca475f4	215	0	215	TRINITY_DN13970_c0_g1_i16	2526	272	583	215	0	-	2	5,210,	0,5,	272,373,
CK_92:753|0e8da89b-0d23-4eb8-98a9-b9a563180966	674	3	674	TRINITY_DN1435_c0_g1_i17	5245	143	1083	670	1	+	3	116,484,71,	3,119,603,	143,504,1012,
CK_102:682|0ce5462c-961b-4239-9ce6-6a35c6a56f15	597	0	597	TRINITY_DN7331_c0_g1_i5	1275	579	1175	595	1	+	2	36,560,	0,37,	579,615,
CK_108:1428|39b71f68-dc8c-4711-8e2a-b6763eb5cb04	1332	0	1332	TRINITY_DN5525_c0_g1_i4	4161	155	2726	1330	2	-	3	270,202,860,	0,270,472,	155,525,1866,
CK_93:1715|829ffee9-3b8f-4575-bc61-41ab5a5437dc	1630	3	1627	TRINITY_DN10550_c0_g1_i2	1830	15	1644	1620	1	-	4	44,17,50,1510,	3,50,67,117,	15,59,78,134,
CK_91:519|a70540f0-5c6c-4c86-aedf-21135d5278cb	445	0	445	TRINITY_DN3444_c0_g2_i7	2006	4	462	443	0	+	5	12,3,61,12,355,	0,12,15,76,90,	4,17,21,85,107,
CK_96:1532|24ef461a-fab4-4292-9c4d-7fdd6a35c32c	1446	0	1438	TRINITY_DN1608_c0_g1_i5	1678	2	1559	1434	3	-	3	120,1259,58,	8,129,1388,	2,122,1501,
CK_84:327|108d0221-cfb0-4c3a-a24d-53527f25c30c	245	0	244	TRINITY_DN4777_c0_g1_i3	1552	1174	1437	244	0	+	2	6,238,	0,6,	1174,1199,
CK_98:1059|0b243f23-ff1c-405d-87f4-969a4c499cf8	979	0	979	TRINITY_DN4272_c1_g1_i3	1656	99	1123	972	7	-	3	37,483,459,	0,37,520,	99,139,664,
CK_94:1267|870f8f7b-da95-464c-93e3-ff909b9a3ca3	1164	0	1164	TRINITY_DN700_c0_g3_i3	2208	83	1330	1163	1	+	2	963,201,	0,963,	83,1129,
CK_105:392|de0182ff-32e2-4d85-ba4a-11f74fc6e208	288	1	287	TRINITY_DN69400_c0_g1_i1	1177	87	569	286	0	-	2	120,166,	1,121,	87,403,
CK_113:823|54d35ce7-e4b0-4ecc-9082-8b68cf1e7b01	711	0	708	TRINITY_DN13785_c0_g1_i3	1581	257	1398	707	1	+	3	408,147,153,	0,408,555,	257,929,1245,
CK_82:488|be8961e6-2b9e-44cc-8b3e-960a929fbb01	404	0	404	TRINITY_DN21680_c0_g1_i2	2400	165	568	400	3	-	2	56,347,	0,57,	165,221,
CK_97:339|30f28758-b218-4efe-bd83-422907c72204	245	0	245	TRINITY_DN39667_c1_g1_i1	466	31	278	244	1	+	3	44,71,130,	0,44,115,	31,76,148,
CK_109:631|89b634c5-9a18-4348-934f-9d64dfa413ea	521	0	521	TRINITY_DN23698_c1_g1_i1	1153	616	1140	518	1	+	3	397,7,115,	0,399,406,	616,1017,1025,
CK_108:1740|5c56ed6f-f74c-428d-8f0c-383f2aa27e55	1635	2	1634	TRINITY_DN4815_c0_g1_i9	3346	66	3245	1622	3	-	3	922,548,155,	1,930,1478,	66,1132,3090,
CK_101:356|1a9aa485-1797-430c-94bc-422505729b1a	255	0	255	TRINITY_DN8573_c0_g2_i4	2593	388	647	254	0	+	2	28,226,	0,29,	388,421,
CK_90:1016|a2073eaf-d851-4c0e-adc1-bba25bfcdec9	912	0	908	TRINITY_DN7925_c0_g1_i6	1355	203	1132	906	2	-	3	138,708,62,	4,142,850,	203,342,1070,
CK_87:823|cf4a7433-3839-47af-8c34-561fa3348dac	744	1	744	TRINITY_DN5459_c0_g1_i1	4403	1415	4214	742	1	+	2	713,30,	1,714,	1415,4184,
CK_109:1682|b994a6c6-e22b-460d-86e2-eaa818c85d25	1595	3	1595	TRINITY_DN4517_c0_g1_i2	2253	267	1964	1584	8	+	2	52,1540,	3,55,	267,424,
CK_86:515|b7ca45bc-1c85-441c-8410-04cbb4b5b552	421	0	421	TRINITY_DN6647_c0_g1_i1	11865	2127	9610	421	0	+	3	37,378,6,	0,37,415,	2127,9185,9604,
CK_107:613|cfbbfc23-3a9e-4d84-b6cb-938283e41fe4	506	1	506	TRINITY_DN550_c3_g1_i4	1317	493	1316	501	4	+	4	25,203,255,22,	1,26,229,484,	493,524,1015,1294,
CK_93:2248|a2613abb-66d9-4165-a8d1-89ec03ad38be	2193	0	2193	TRINITY_DN803_c0_g1_i1	3588	17	3269	2178	13	-	7	185,16,8,8,86,1820,68,	0,185,201,211,219,305,2125,	17,205,222,231,240,416,3201,
CK_90:639|d6ee0020-5840-4b11-9356-b0812f14c02c	541	0	540	TRINITY_DN6146_c0_g1_i1	2173	445	994	538	2	+	2	17,523,	0,17,	445,471,
CK_98:1938|e8d650eb-9f6e-4de0-9a98-26876eed1131	1835	5	1835	TRINITY_DN8861_c1_g1_i4	2936	68	2837	1821	7	-	3	134,763,931,	0,136,899,	68,203,1906,
CK_114:1136|9de48b06-175c-4671-a445-4e227d0d50f1	1027	0	1023	TRINITY_DN6110_c0_g1_i1	1416	170	1274	1017	1	+	2	453,565,	0,458,	170,709,
CK_90:3950|c68bd7ab-270a-47c4-9cca-d7688652fee4	3878	0	3876	TRINITY_DN4152_c0_g2_i1	4247	272	4187	3868	8	-	3	2925,449,502,	2,2927,3376,	272,3215,3685,
CK_92:365|a058206c-8b23-4637-9814-f10f41c10a4c	284	1	284	TRINITY_DN7599_c0_g1_i1	1435	113	678	283	0	-	2	6,277,	0,6,	113,401,
CK_99:2127|534f6c93-f3d2-43e5-8772-de9208939bf0	2044	0	2038	TRINITY_DN8350_c1_g1_i2	2092	48	2091	2034	4	-	3	60,1921,57,	6,66,1987,	48,109,2034,
CK_89:778|05fd17d9-29ca-4679-8792-f5254061ec6b	687	0	687	TRINITY_DN3180_c0_g1_i4	2993	20	2889	683	1	-	4	26,321,330,7,	0,27,348,680,	20,49,2552,2882,
CK_108:1553|178e5a10-948f-40dd-9795-983c860026b6	1454	2	1454	TRINITY_DN619_c0_g1_i24	1630	72	1526	1441	11	-	2	1307,145,	0,1307,	72,1381,
CK_103:1127|7e082600-addd-4e75-a18e-c1bf9469d48d	1031	0	1031	TRINITY_DN501_c0_g1_i10	3479	2439	3470	1022	4	+	3	860,32,134,	0,860,897,	2439,3300,3336,
CK_99:609|ac3898c6-50a9-4beb-b421-009d3c5f21ef	516	0	516	TRINITY_DN28514_c0_g1_i4	1133	179	1091	512	3	-	2	239,276,	0,240,	179,815,
CK_94:2641|b728b073-46b5-43f4-afac-008150ec561c	2568	0	2568	TRINITY_DN19569_c0_g1_i3	2900	155	2726	2547	8	+	9	97,1337,54,293,221,23,232,88,210,	0,98,1437,1493,1786,2013,2036,2269,2358,	155,252,1590,1649,1944,2172,2196,2428,2516,
CK_99:1289|04bc6a6b-1c22-487b-8313-9fbecdf1d118	1195	0	1195	TRINITY_DN27414_c2_g1_i1	2050	790	1996	1188	6	+	6	118,343,266,137,286,44,	0,119,462,728,865,1151,	790,910,1254,1522,1662,1952,
CK_100:380|ab018957-fd89-4601-8d7d-ba4249dbe6db	280	0	280	TRINITY_DN2533_c0_g1_i9	1363	629	909	278	2	-	1	280,	0,	629,
CK_97:2362|3f1e7394-cb70-488c-9843-0a16ab40b300	2282	2	2282	TRINITY_DN7968_c0_g1_i1	3821	1011	3592	2278	2	+	3	1719,557,4,	2,1721,2278,	1011,3030,3588,
CK_99:3381|c6b1cbd3-9c6e-487a-bdcf-9c5518b25e68	3292	9	3292	TRINITY_DN7699_c0_g1_i1	3298	0	3286	3279	4	+	2	3258,25,	9,3267,	0,3261,
CK_99:432|5ddcee67-9534-4a3f-ab5f-2d580776636e	333	0	333	TRINITY_DN46133_c1_g1_i1	2830	300	635	331	2	-	3	142,20,171,	0,142,162,	300,443,464,
CK_87:1803|1fe6c35e-2d3f-4287-ae46-913472d70f09	1730	2	1721	TRINITY_DN11298_c0_g1_i1	2829	487	2205	1713	5	+	2	5,1713,	2,8,	487,492,
CK_102:9780|99fa7f61-57cb-49ef-9af3-1f7b69d39210	9832	2	9815	TRINITY_DN4192_c0_g1_i2	9938	0	9876	9776	18	-	8	7049,1714,7,701,227,4,11,81,	17,7066,8780,8790,9491,9719,9725,9749,	0,7052,8767,8778,9541,9768,9772,9795,
CK_104:1785|6690f63d-deb3-4808-8c4f-4061f5da1a27	1691	3	1690	TRINITY_DN3736_c0_g1_i5	3054	767	2954	1675	12	-	2	784,903,	1,785,	767,2051,
CK_101:513|6f2c54c0-e161-42d2-9b9d-6b23c2a5bd4d	412	0	412	TRINITY_DN73179_c0_g3_i1	1867	1454	1864	408	2	+	3	326,22,62,	0,327,350,	1454,1780,1802,
CK_103:2123|24cf2be5-cdae-4aee-ad50-2c1005adfc11	2038	2	2037	TRINITY_DN45879_c0_g1_i6	2614	65	2594	2031	3	-	5	851,428,146,602,7,	1,852,1280,1426,2029,	65,1030,1491,1985,2587,
CK_96:974|95d884a5-e286-4254-aefb-aa0f90b759b3	879	5	879	TRINITY_DN1300_c2_g1_i1	3433	811	1685	874	0	+	1	874,	5,	811,
CK_95:1345|26606e6f-de00-4dd8-b0a4-f657030ca104	1257	4	1255	TRINITY_DN4122_c0_g1_i1	1920	263	1844	1246	3	+	3	564,14,671,	4,570,584,	263,828,1173,
CK_94:466|a91e5659-b306-4848-9526-ccf52755a5a3	381	0	381	TRINITY_DN1315_c0_g1_i23	1557	94	693	378	2	+	3	77,298,5,	0,78,376,	94,368,688,
CK_95:1009|cad36b0f-ede8-4f6e-aa33-6e2e2e901001	923	0	920	TRINITY_DN9027_c0_g1_i1	3242	62	983	920	0	+	2	277,643,	0,277,	62,340,
CK_102:382|44c79a4a-2175-44fc-b39a-00b3f3d0088c	284	0	284	TRINITY_DN3141_c0_g1_i4	4708	1899	2564	283	1	+	2	278,6,	0,278,	1899,2558,
CK_88:623|04f5acd1-7843-4fbd-a22d-79c35d65f185	534	0	530	TRINITY_DN2366_c0_g1_i7	2137	220	998	530	0	-	3	354,123,53,	4,358,481,	220,820,945,
CK_106:2510|57075eef-65f6-4c76-959c-310f4e9d4912	2430	0	2430	TRINITY_DN7146_c0_g1_i3	6409	443	2979	2425	5	+	3	81,2211,138,	0,81,2292,	443,627,2841,
CK_102:306|c3159d1c-1661-4a95-b10f-0e39336c11fd	210	0	209	TRINITY_DN119_c2_g1_i1	1309	367	650	209	0	+	2	7,202,	0,7,	367,448,
CK_92:1596|f1b61d1b-281b-47af-af78-1b069088de97	1512	0	1512	TRINITY_DN7324_c0_g1_i1	2010	4	1895	1510	2	-	3	317,1105,90,	0,317,1422,	4,477,1805,
CK_67:337|bc4da5ea-1b32-42d5-a6b3-39d57043b8c7	277	0	276	TRINITY_DN24695_c1_g1_i2	604	165	543	275	1	-	3	256,10,10,	1,257,267,	165,511,533,
CK_86:305|1d8cac4d-7212-4ba5-abc0-a22a73d4f8a2	220	0	220	TRINITY_DN8028_c0_g1_i4	2094	152	778	219	1	-	2	215,5,	0,215,	152,773,
CK_92:3192|6865e0a0-b75e-470d-aa05-cc80a7f49bf8	3111	0	3111	TRINITY_DN5426_c0_g1_i6	3560	6	3356	3086	25	-	9	210,247,66,15,397,1865,213,47,51,	0,210,457,523,538,935,2800,3013,3060,	6,331,579,647,667,1143,3009,3255,3305,
CK_97:3274|5e4dc057-8c99-4871-8cf3-bec86954ffa4	3221	0	3220	TRINITY_DN863_c0_g1_i11	3727	260	3474	3211	3	+	3	147,3047,20,	0,152,3200,	260,407,3454,
CK_100:757|1f0a91b1-f9b1-494c-b580-934527c68a84	663	0	659	TRINITY_DN10402_c0_g1_i2	2116	123	874	657	2	+	2	277,382,	0,277,	123,492,
CK_98:1246|9a627f39-a1c9-41e7-a98e-3758a26fd761	1166	5	1165	TRINITY_DN10655_c0_g2_i5	1325	10	1170	1156	4	-	1	1160,	1,	10,
CK_102:746|d4618861-b809-4b89-b42e-6c32567bd93f	642	0	642	TRINITY_DN3740_c0_g1_i2	4328	172	815	638	4	-	2	352,290,	0,352,	172,525,
CK_105:694|893f2899-7a49-478b-9fb2-7d9ca2999f94	590	3	590	TRINITY_DN170412_c0_g1_i1	865	13	599	586	0	+	2	499,87,	3,503,	13,512,
CK_106:2130|aeb00eda-654e-4d94-83f9-29e63634d0df	2039	2	2036	TRINITY_DN10030_c0_g1_i1	2937	796	2832	2024	9	+	2	1864,169,	2,1867,	796,2663,
CK_98:6895|e32d93ab-d42e-4453-8e76-cd7815fc58d0	6900	3	6900	TRINITY_DN14220_c0_g1_i7	7543	52	7484	6881	4	-	6	10,297,3577,2404,39,558,	0,11,308,3889,6295,6339,	52,62,876,4475,6879,6926,
CK_86:3232|4f1e3836-99e5-4c4d-9756-c39fce8b620b	3154	1	3154	TRINITY_DN7212_c0_g1_i3	3295	74	3227	3146	7	-	1	3153,	0,	74,
CK_102:463|5bef5e81-7c5e-4572-84aa-4c263771fab1	363	0	363	TRINITY_DN15870_c0_g1_i7	2133	51	819	363	0	-	2	6,357,	0,6,	51,462,
CK_90:369|77f258ac-2c6e-484d-af18-e6d74b65ba47	278	1	278	TRINITY_DN20604_c1_g2_i2	2649	2044	2321	277	0	-	1	277,	0,	2044,
CK_104:467|bcd28572-157c-41b9-9981-74e6d4a4e6c8	370	0	370	TRINITY_DN4695_c0_g1_i2	2184	597	1097	370	0	+	2	8,362,	0,8,	597,735,
CK_99:781|c87067cd-df26-4d90-950c-841c661ce8dd	683	2	683	TRINITY_DN3143_c1_g1_i1	1991	1276	1958	680	1	-	2	663,18,	0,663,	1276,1940,
CK_87:544|42621b05-5dd4-4358-bd20-3e8221cb2084	461	0	461	TRINITY_DN3613_c0_g1_i3	2358	863	2102	458	3	+	2	231,230,	0,231,	863,1872,
CK_102:2827|d2eef61e-3d38-4b41-873d-3691877892d0	2742	0	2742	TRINITY_DN23355_c0_g1_i3	3433	4	3301	2736	6	-	4	24,229,484,2005,	0,24,253,737,	4,30,713,1296,
CK_100:1035|8a190e26-8092-45fa-a553-ea30c5706ba5	943	0	942	TRINITY_DN75220_c0_g2_i1	2079	627	1821	937	3	+	5	651,17,147,56,69,	0,651,668,815,873,	627,1334,1547,1695,1752,
CK_87:767|ed2acec6-53ff-473c-a89b-8e7ade508199	681	0	677	TRINITY_DN7346_c0_g1_i5	1279	46	853	676	1	+	2	339,338,	0,339,	46,515,
CK_107:402|7e6148d4-368b-4f54-b186-61f4b6fd31cc	291	0	291	TRINITY_DN33262_c0_g1_i2	5596	1434	1929	290	1	-	2	285,6,	0,285,	1434,1923,
CK_99:412|2d234fb2-6b5f-4dc5-9ea0-12d586899716	314	0	314	TRINITY_DN28510_c0_g1_i1	361	2	316	311	2	-	3	77,10,226,	0,78,88,	2,79,90,
CK_99:455|c33cf244-d883-493d-a980-be8ae94728e8	366	1	366	TRINITY_DN22789_c4_g1_i2	715	329	706	364	1	-	2	291,74,	0,291,	329,632,
CK_104:597|01325aa7-0da4-4564-9241-c567d1ee9517	506	0	506	TRINITY_DN2114_c0_g1_i2	3077	535	2115	502	4	+	4	108,28,122,248,	0,108,136,258,	535,1715,1744,1867,
CK_107:1947|c6abe7fc-c766-4058-baa7-94135cfaeb2c	1850	4	1849	TRINITY_DN11468_c0_g1_i7	2930	8	2914	1841	3	-	5	1023,161,88,561,11,	1,1024,1185,1273,1835,	8,1430,1768,2342,2903,
CK_107:1914|6145975c-a95f-4a4b-9116-ef0fde405d5a	1814	2	1814	TRINITY_DN4152_c0_g2_i1	4247	429	4183	1807	4	-	4	76,7,228,1500,	0,76,83,312,	429,2447,2455,2683,
CK_90:2766|7a12289f-6058-4d1e-a210-a5aa1b1b3d9d	2679	0	2679	TRINITY_DN9053_c0_g2_i21	5515	204	2896	2654	18	+	9	996,50,11,245,150,800,7,61,352,	0,996,1046,1058,1305,1458,2258,2265,2327,	204,1201,1254,1268,1520,1672,2473,2481,2544,
CK_95:536|4c6773b4-1e78-4a0b-b0de-908edeb242c2	454	0	454	TRINITY_DN11037_c0_g1_i1	1645	987	1443	452	1	+	2	444,9,	0,445,	987,1434,
CK_99:304|644f68ee-9e4a-48f7-9d2c-0faf898f07f2	207	0	207	TRINITY_DN121_c0_g1_i1	2615	2090	2497	206	1	+	2	200,7,	0,200,	2090,2490,
CK_110:700|82e18303-055c-4980-a813-b6d1aa15acb7	594	0	594	TRINITY_DN26193_c0_g2_i1	1388	724	1368	593	1	+	2	495,99,	0,495,	724,1269,
CK_98:874|8af45af5-982f-4f75-8641-187167405649	779	0	778	TRINITY_DN53263_c1_g5_i1	4038	2735	3615	773	5	-	2	499,279,	1,500,	2735,3336,
CK_85:1929|a4d8552d-253c-4e85-b457-b356c29b79da	1850	8	1850	TRINITY_DN4460_c0_g1_i9	3747	155	3000	1841	0	+	6	6,1155,10,76,5,589,	8,14,1170,1180,1256,1261,	155,162,1317,2015,2094,2411,
CK_97:1005|cf280ef8-ff47-4047-859b-f14982320c8b	926	0	926	TRINITY_DN2341_c0_g1_i1	1616	51	1073	924	2	-	3	408,109,409,	0,408,517,	51,476,664,
CK_96:482|e6318e63-2a4d-4764-9c21-5b937953cea7	391	0	388	TRINITY_DN12056_c0_g1_i3	1921	286	731	388	0	-	2	132,256,	3,135,	286,475,
CK_105:2068|42b008e0-84b3-4aad-b999-f648de26c01e	1954	2	1953	TRINITY_DN2200_c4_g1_i2	2240	94	2102	1936	3	+	15	326,555,11,8,9,21,34,6,46,15,8,74,705,7,114,	2,328,889,900,911,920,941,975,981,1027,1042,1053,1127,1832,1839,	94,455,1018,1030,1042,1054,1076,1111,1120,1167,1183,1197,1274,1980,1988,
CK_92:1547|67042692-dfd2-42cc-9b80-803bc9a68d47	1472	4	1471	TRINITY_DN3782_c0_g2_i2	4276	23	4232	1460	1	-	3	53,3,1405,	1,60,63,	23,738,2827,
CK_102:2128|34f5a5a2-6cb3-4779-b857-f50c24d02399	2033	2	2033	TRINITY_DN5505_c0_g1_i4	4719	20	4718	2018	6	-	4	219,603,1175,27,	0,219,822,2004,	20,242,3516,4691,
CK_87:1070|57283ebc-5e01-40eb-b9d2-99dafd3bdd95	999	0	995	TRINITY_DN7538_c0_g1_i1	1300	29	1228	994	1	-	2	551,444,	4,555,	29,784,
CK_99:1106|1d446a50-cce3-4d3d-b64c-76ba12b10179	1039	2	1032	TRINITY_DN15420_c1_g1_i1	1553	321	1488	1029	1	+	3	354,516,160,	2,356,872,	321,811,1328,
CK_100:1356|9393ef2d-7a96-4ae2-a6a5-8101f254113a	1264	0	1263	TRINITY_DN2071_c0_g1_i1	1697	284	1546	1255	7	-	2	88,1174,	1,90,	284,372,
CK_101:953|e9fdc569-0638-494f-bd9f-1f0fde6e6a71	856	0	852	TRINITY_DN3415_c3_g1_i1	1147	172	1025	851	1	-	2	827,25,	4,831,	172,1000,
CK_89:766|59161835-11ae-410e-afff-5c59f2892354	677	0	673	TRINITY_DN3860_c0_g1_i1	1858	989	1725	673	0	+	2	244,429,	0,244,	989,1296,
CK_86:1049|109ed173-8f4e-4563-a83f-377428ff1047	967	4	965	TRINITY_DN1220_c5_g1_i4	1203	2	1048	959	2	+	3	63,65,833,	4,67,132,	2,142,215,
CK_85:510|4b7af1d8-8d5f-4c6f-b0eb-58d8c955734f	433	0	433	TRINITY_DN2160_c0_g1_i2	3381	175	2230	431	0	-	3	13,139,279,	0,13,154,	175,239,1951,
CK_90:1188|d1112657-5706-4755-858b-49d06747c11e	1106	0	1106	TRINITY_DN18534_c2_g1_i1	1293	176	1287	1095	11	-	3	830,7,269,	0,830,837,	176,1009,1018,
CK_101:1327|9ff2a72a-d38c-417c-9b3e-dc3ee0eb4738	1226	2	1226	TRINITY_DN4165_c1_g1_i11	2818	151	1382	1216	6	-	8	392,147,439,6,17,96,12,113,	0,392,539,978,985,1002,1098,1111,	151,544,692,1133,1141,1160,1257,1269,
CK_85:617|5384c905-782d-4ab4-adab-bc98db9f0546	528	0	527	TRINITY_DN1592_c0_g1_i4	2016	685	1212	524	3	-	1	527,	1,	685,
CK_116:2597|85067143-eb4e-4bcf-b8a3-d2f8e4739a1e	2467	2	2464	TRINITY_DN473_c5_g1_i1	2572	14	2572	2449	7	-	6	18,1339,727,262,60,50,	3,26,1365,2092,2355,2415,	14,34,1466,2194,2459,2522,
CK_47:272|d55cb04d-4956-42e0-81f3-55426bbfcf93	227	0	227	TRINITY_DN6927_c1_g1_i3	1860	574	1252	225	2	-	2	222,5,	0,222,	574,1247,
CK_109:543|6ce55454-a228-434c-b33d-ad1852346e04	436	0	436	TRINITY_DN34134_c3_g1_i1	1359	667	1105	432	4	-	3	14,366,56,	0,14,380,	667,682,1049,
CK_101:629|5f99b266-e2d7-48c2-b84d-a6a459226215	534	0	534	TRINITY_DN3266_c0_g1_i2	2910	2120	2813	529	4	+	3	235,293,5,	0,236,529,	2120,2471,2808,
CK_92:1199|9fabb9b1-84a1-4609-bb39-3ce83e2f8f18	1117	0	1112	TRINITY_DN987_c0_g1_i2	1429	151	1405	1112	0	+	3	113,412,587,	0,113,525,	151,377,818,
CK_91:630|089c8336-b96a-44a6-9c37-48b21d4a6cbc	541	0	537	TRINITY_DN1188_c0_g1_i5	2164	1316	2052	537	0	+	3	217,3,317,	0,217,220,	1316,1569,1735,
CK_104:804|0c843b5e-f8eb-4f02-9cd8-1a063af302db	702	1	702	TRINITY_DN1241_c1_g1_i1	2422	121	1770	698	3	-	2	183,518,	0,183,	121,1252,
CK_90:888|dacd6d39-4ba8-48d8-a0e3-634c905bc8e3	801	3	801	TRINITY_DN8745_c0_g1_i14	2883	66	907	793	5	-	3	292,6,500,	0,292,298,	66,364,407,
CK_102:620|2edb8319-a80c-4844-b8d5-9d69793e0eef	519	0	519	TRINITY_DN19160_c0_g2_i4	739	134	654	515	0	+	8	19,80,24,24,4,64,129,171,	0,19,100,124,149,155,219,348,	134,154,234,259,283,287,353,483,
CK_90:493|e0c16d91-aa00-49b7-95a5-ca40a9a46d17	401	0	401	TRINITY_DN2998_c1_g1_i6	4269	3821	4223	397	2	+	4	122,80,4,193,	0,124,204,208,	3821,3943,4024,4030,
CK_91:320|60117bd1-beab-4f3e-9fa1-46fa2e417f73	229	1	229	TRINITY_DN13628_c0_g1_i4	1141	362	1022	227	1	-	3	6,137,85,	0,6,143,	362,623,937,
CK_111:415|984333a7-2507-41d2-b224-8c15bfd786d2	309	2	309	TRINITY_DN1061_c0_g1_i10	2750	1874	2281	306	1	+	2	302,5,	2,304,	1874,2276,
CK_103:1136|7276cc57-cc87-4f30-8fab-85321938c58e	1033	0	1033	TRINITY_DN7887_c0_g1_i2	4303	3149	4183	1030	2	+	4	615,28,26,363,	0,616,644,670,	3149,3764,3793,3820,
CK_95:1506|feb023f7-9374-421d-a428-cade73f5855f	1426	1	1425	TRINITY_DN1668_c0_g1_i2	1758	60	1595	1421	3	+	2	1178,246,	1,1179,	60,1349,
CK_98:1387|c59a2a95-dd09-4845-849e-5f8ea9ec9b4a	1296	0	1291	TRINITY_DN5505_c0_g1_i4	4719	72	4053	1286	5	-	3	619,135,537,	5,624,759,	72,710,3516,
CK_121:809|02578f5e-d791-47f2-961f-e409674b4053	689	3	689	TRINITY_DN27062_c0_g1_i1	2382	151	905	683	3	+	2	475,211,	3,478,	151,694,
CK_89:873|7aa159a3-b8c2-4121-84f8-5dc924091a09	793	0	793	TRINITY_DN1197_c2_g1_i1	1011	74	923	788	3	+	3	524,14,253,	0,524,540,	74,653,670,
CK_99:2905|8afacd8d-db16-4e24-9074-4cd9ef3b7952	2814	3	2811	TRINITY_DN4685_c0_g1_i2	3724	157	3242	2793	14	-	4	159,34,37,2577,	3,162,197,234,	157,501,535,665,
CK_96:1713|bcf53bd8-f8bf-4d1b-be75-a7e4607333b8	1626	3	1624	TRINITY_DN8754_c0_g1_i1	1823	40	1696	1614	3	-	2	370,1247,	2,376,	40,449,
CK_103:670|8801cfe8-9d1c-4e78-8b56-c059a89340fe	565	0	565	TRINITY_DN27856_c1_g1_i3	2876	8	2388	562	2	-	4	24,97,319,124,	0,24,121,441,	8,50,1945,2264,
CK_97:1352|d6867ba0-bdea-4680-b9ef-6b2a568814f7	1269	0	1269	TRINITY_DN224_c0_g1_i1	1339	14	1313	1260	9	+	4	1007,3,111,148,	0,1007,1010,1121,	14,1025,1050,1165,
CK_96:3385|a3586476-ebc5-494c-b794-21b24cbbba53	3327	0	3305	TRINITY_DN47441_c0_g1_i2	4214	15	3320	3304	1	+	1	3305,	0,	15,
CK_102:867|dc6e6cf3-eb6d-43fe-99ff-a9681f745b45	761	0	760	TRINITY_DN1364_c0_g3_i1	2649	137	959	758	1	+	2	164,595,	0,165,	137,364,
CK_90:828|9600aa1a-fb42-4876-b76c-c5b64852dea6	737	0	736	TRINITY_DN1757_c2_g1_i1	2711	1914	2651	735	0	+	4	506,210,12,7,	0,506,717,729,	1914,2421,2631,2644,
CK_103:621|5aec53bf-ad23-4039-9679-ef7a91d7c801	528	1	528	TRINITY_DN1875_c2_g1_i6	1003	428	956	526	1	-	2	506,21,	0,506,	428,935,
CK_90:580|25b94d31-068c-474c-97b9-93f7e9807b78	500	0	500	TRINITY_DN3782_c0_g2_i2	4276	0	579	499	1	-	2	17,483,	0,17,	0,96,
CK_96:538|c6654307-2e1c-4bd5-af78-4f88c96dd9cc	439	0	439	TRINITY_DN7870_c0_g2_i1	673	83	633	437	2	+	2	432,7,	0,432,	83,626,
CK_95:850|d0576ca3-90d0-42c0-aa10-ea76131bbe3a	760	0	760	TRINITY_DN37319_c0_g1_i2	5514	2735	3537	754	3	-	7	5,31,230,254,12,44,181,	0,5,36,267,521,534,579,	2735,2782,2814,3044,3300,3312,3356,
CK_94:2074|036a527f-7589-475a-82de-1948c99751e1	2003	0	1999	TRINITY_DN2880_c0_g1_i6	2403	133	2317	1984	12	-	3	313,110,1573,	4,317,430,	133,621,744,
CK_64:3161|e04bf67d-4675-4d21-b767-f0e557916c9d	3166	2	3139	TRINITY_DN7704_c1_g1_i2	3451	307	3451	3135	2	+	3	194,237,2706,	2,196,433,	307,507,745,
CK_101:2438|8f3a899f-3ad1-4b69-b2a2-71e709dce6ae	2342	9	2339	TRINITY_DN32_c1_g1_i1	3664	210	3664	2326	4	-	3	1167,1097,66,	3,1170,2267,	210,2500,3598,
CK_103:1435|f77d6acd-8346-4af5-91a0-470c86166aab	1340	2	1338	TRINITY_DN912_c0_g2_i1	1560	188	1528	1328	3	+	8	110,5,8,57,1035,47,23,46,	2,112,117,125,184,1220,1269,1292,	188,300,308,317,374,1409,1456,1482,
CK_107:1343|bd2b51b3-9d69-4f36-b2de-530a15fa238f	1281	8	1281	TRINITY_DN11981_c0_g1_i3	1773	6	1698	1272	1	-	7	79,7,13,448,107,306,313,	0,79,86,99,547,654,960,	6,87,100,114,947,1062,1385,
CK_103:2148|de5b4883-2fa1-407b-a38c-9ec9b85da715	2057	2	2054	TRINITY_DN3133_c0_g1_i6	3668	1617	3668	2039	12	+	2	1778,273,	2,1781,	1617,3395,
CK_105:865|778311e8-ad76-4a7f-8400-64daec8af534	761	5	761	TRINITY_DN67153_c0_g1_i1	878	60	846	754	2	+	5	23,5,528,194,6,	5,28,33,561,755,	60,84,91,642,840,
CK_91:622|9bce7a54-9505-475b-89b4-563bc1e39ed1	537	3	537	TRINITY_DN28870_c2_g1_i1	901	297	847	532	2	+	2	276,258,	3,279,	297,589,
CK_95:823|9470ff51-c8f1-4263-a2ff-75bdb816d787	738	3	737	TRINITY_DN2814_c2_g2_i1	1145	263	1002	732	2	-	3	21,13,700,	1,22,35,	263,286,302,
CK_104:1352|9ec6c1e8-4244-47dd-b315-3646927ef82f	1294	2	1293	TRINITY_DN20309_c0_g1_i18	1549	131	1422	1284	7	-	1	1291,	1,	131,
CK_103:485|39dae02b-b3ff-4719-adf0-8d4fce6c727e	382	0	382	TRINITY_DN19069_c1_g2_i1	975	384	767	380	1	-	4	140,81,104,56,	0,140,221,326,	384,525,607,711,
CK_91:434|9fc75fe3-c2b4-464b-8396-7f667feeaa5d	343	0	343	TRINITY_DN550_c3_g1_i4	1317	428	1317	342	1	+	3	45,275,23,	0,45,320,	428,995,1294,
CK_102:2291|e2806e54-ccbf-439f-94fc-b2f9a1afa58e	2205	3	2202	TRINITY_DN14263_c0_g1_i1	2625	163	2480	2193	6	-	2	1739,460,	3,1742,	163,2020,
CK_88:383|778b0f14-d8e6-49f4-acd6-072f27b1cd0d	293	0	293	TRINITY_DN18534_c2_g1_i1	1293	883	1287	291	2	-	2	7,286,	0,7,	883,1001,
CK_100:416|7692aecf-7fde-469f-a904-26ad57afd6cc	318	0	318	TRINITY_DN32361_c2_g1_i1	1110	19	343	315	1	-	6	9,79,30,20,5,173,	0,9,88,118,139,145,	19,29,109,140,162,170,
CK_102:324|c7267d8b-8826-47be-a9ec-21552b3d8b6a	222	0	222	TRINITY_DN138689_c0_g1_i1	427	169	392	222	0	+	2	207,15,	0,207,	169,377,
CK_102:606|c074ad4a-5c3a-472d-99ed-e6d74ba268e5	511	2	511	TRINITY_DN12416_c1_g1_i2	1166	195	1149	507	2	-	4	247,4,251,7,	0,247,251,502,	195,444,890,1142,
CK_90:672|e9fcd7a6-a756-40af-b5f6-963e54f3db7c	584	0	584	TRINITY_DN5919_c0_g1_i3	1268	51	674	579	5	+	3	417,162,5,	0,417,579,	51,471,669,
CK_106:991|e49662c1-f534-46e3-a907-19caac6fab58	887	3	887	TRINITY_DN23519_c2_g1_i1	1190	8	1123	882	2	-	2	380,504,	0,380,	8,619,
CK_89:834|0654d5dc-1eea-4ac8-ba00-15c1c5c37d48	753	0	753	TRINITY_DN794_c0_g1_i36	2586	6	1012	753	0	-	3	443,275,35,	0,443,718,	6,473,977,
CK_102:578|a2aa2666-e140-4c09-9080-76fbd4027063	481	0	481	TRINITY_DN7161_c1_g1_i2	2418	1838	2326	477	3	+	6	8,231,48,36,99,58,	0,8,239,287,324,423,	1838,1847,2080,2129,2165,2268,
CK_104:854|b716b8e5-be12-4f6e-a81e-4072eac85dca	752	2	748	TRINITY_DN4754_c0_g1_i2	1143	390	1135	745	0	-	2	11,734,	4,16,	390,401,
CK_104:473|7bbefbad-443d-4b60-934d-12b2f3284687	375	0	374	TRINITY_DN2268_c3_g1_i4	1896	955	1363	373	1	+	2	237,137,	0,237,	955,1226,
CK_96:1032|708dc904-731e-48ed-b009-14bb29753047	954	2	953	TRINITY_DN6926_c0_g1_i3	2297	1031	2035	950	1	-	2	650,301,	1,651,	1031,1734,
CK_98:1928|0a7f8522-e79d-49ac-969f-7f268311de88	1838	4	1834	TRINITY_DN12853_c0_g1_i2	1885	0	1833	1825	4	-	3	1789,23,17,	4,1794,1817,	0,1791,1816,
CK_89:1557|a82b4fec-49a5-4c49-944b-3ecb000b8525	1489	1	1489	TRINITY_DN264_c3_g4_i1	1883	18	1506	1486	2	-	1	1488,	0,	18,
CK_104:390|e1f5f767-4fe8-4644-8c78-22a2b9f4d44e	292	0	291	TRINITY_DN12685_c0_g1_i30	4866	4030	4322	290	1	-	2	59,232,	1,60,	4030,4090,
CK_102:1354|bcba9ee1-14e5-4267-a112-460c7775438f	1256	2	1256	TRINITY_DN19613_c0_g1_i2	1848	59	1482	1249	4	+	4	148,755,333,17,	2,150,905,1239,	59,353,1111,1465,
CK_92:480|b34826a5-9a6a-4b7e-9ec4-fc87757dfdf3	390	0	390	TRINITY_DN2318_c0_g1_i7	1792	101	494	388	2	-	3	78,28,284,	0,78,106,	101,181,210,
CK_94:1976|7cb2f232-db83-4a63-809b-20b9e49504ec	1883	3	1880	TRINITY_DN30338_c0_g1_i1	1981	63	1981	1869	3	-	3	207,318,1347,	3,215,533,	63,277,634,
CK_103:601|833cd023-1227-47ad-ad66-a533476e4628	498	0	498	TRINITY_DN19229_c1_g1_i2	1839	834	1337	495	0	-	7	8,51,42,131,64,113,86,	0,9,60,103,234,299,412,	834,846,899,941,1073,1137,1251,
CK_89:681|e2be4651-bc1e-4f1a-80d4-e89f900cb8e1	585	3	585	TRINITY_DN9808_c0_g1_i11	2829	465	1324	582	0	-	3	6,432,144,	0,6,438,	465,544,1180,
CK_92:686|1ab82df8-4070-49bb-bbbb-36e1661179f2	589	0	587	TRINITY_DN8053_c0_g1_i8	1609	884	1589	585	2	-	2	314,273,	2,316,	884,1316,
CK_85:580|855e77a1-c18b-4156-8c52-533b262468f7	496	0	493	TRINITY_DN1521_c0_g3_i1	2714	75	1056	493	0	-	2	52,441,	3,55,	75,615,
CK_96:1052|bbbe47ce-b1ac-44ff-b80c-79ddc75b3567	957	0	957	TRINITY_DN8124_c0_g2_i1	1617	76	1613	950	0	+	5	349,524,20,50,7,	0,351,877,899,950,	76,1007,1531,1551,1606,
CK_102:1027|f70484cb-b14e-49dc-860c-47156f15ff29	930	3	930	TRINITY_DN3225_c1_g2_i1	1445	175	1373	924	1	-	4	80,15,619,211,	0,81,97,716,	175,259,274,1162,
CK_106:2208|0a766b42-b4de-484f-a609-e1dbd7488596	2125	7	2123	TRINITY_DN3751_c4_g2_i1	2225	45	2160	2111	3	+	2	2103,11,	7,2112,	45,2149,
CK_93:1138|a711ac7e-4ef4-4570-8f35-2db58ca6dc96	1049	4	1047	TRINITY_DN93370_c0_g1_i1	1331	92	1237	1039	0	+	4	498,5,18,518,	4,502,507,529,	92,626,701,719,
CK_91:1358|ad5c8355-b47b-4e0d-acdd-74d2888c4181	1268	0	1262	TRINITY_DN8571_c1_g1_i1	1643	66	1559	1258	4	-	3	533,450,279,	6,539,989,	66,705,1280,
CK_82:1644|c26c4e15-2a4b-46d1-a086-916523a9e58e	1573	0	1572	TRINITY_DN1481_c0_g1_i25	1848	58	1791	1563	9	-	2	1208,364,	1,1209,	58,1427,
CK_98:1353|8b347373-b3b3-4a80-a306-d863d62253bd	1271	1	1271	TRINITY_DN9539_c0_g1_i2	4207	116	1964	1269	1	-	2	841,429,	0,841,	116,1535,
CK_90:886|38f21bf2-6afb-44e2-931c-a30565dcf6c1	797	0	793	TRINITY_DN8219_c0_g1_i7	2141	780	1930	792	1	+	2	549,244,	0,549,	780,1686,
CK_108:1420|7de27dcb-f4af-4bd4-938c-3aca259efe07	1302	2	1299	TRINITY_DN2557_c2_g1_i7	1838	62	1454	1291	6	+	2	769,528,	2,771,	62,926,
CK_101:1723|38d8ca88-ea9d-499e-9038-c9e99ac21783	1624	2	1624	TRINITY_DN28736_c0_g1_i3	2441	0	2386	1613	9	-	4	5,580,4,1033,	0,5,585,589,	0,111,770,1353,
CK_104:1055|bea648a1-25e4-4bca-a418-45c67a2120fa	961	1	961	TRINITY_DN6626_c0_g1_i1	2726	363	1320	954	1	+	4	4,5,59,887,	1,5,11,74,	363,368,373,433,
CK_92:924|8d43d122-dfcc-4fec-98a9-54676ae0878f	839	0	832	TRINITY_DN2758_c0_g1_i3	3625	409	1726	832	0	-	3	472,177,183,	7,479,656,	409,1256,1543,
CK_88:4172|1443ede1-d7d0-486e-8c2d-9f8aaf632598	4105	15	4105	TRINITY_DN2070_c0_g1_i16	5741	7	5529	4075	5	+	6	47,285,436,34,2889,389,	15,63,348,790,827,3716,	7,54,542,978,1012,5140,
CK_36:469|bde644cb-1a4f-4c5c-8a55-183edde660dc	436	0	436	TRINITY_DN4540_c0_g2_i2	1633	32	507	432	4	-	3	164,25,247,	0,164,189,	32,206,260,
CK_105:327|9cb05915-a157-4cd8-b21c-5e5b95a3f402	220	0	218	TRINITY_DN4152_c0_g2_i1	4247	272	1973	218	0	-	3	170,5,43,	2,172,177,	272,444,1930,
CK_99:497|bd2dd2a0-9668-4824-9ebf-8f40297fe4c4	408	0	408	TRINITY_DN34130_c0_g1_i2	984	346	774	408	0	+	2	402,6,	0,402,	346,768,
CK_92:1508|c516af1d-6fc8-4270-aed4-91b71aa69c77	1413	0	1406	TRINITY_DN5285_c0_g1_i5	2991	0	1862	1399	7	-	2	1264,142,	7,1271,	0,1720,
CK_104:739|2bfce014-6dc1-487a-8a14-7fe4dec83c5b	653	0	653	TRINITY_DN9731_c0_g2_i2	958	4	653	647	2	-	2	55,594,	0,59,	4,59,
CK_105:3021|b10bb085-f222-4b18-bf1c-f8baa25fb6e0	2932	2	2928	TRINITY_DN31105_c0_g1_i3	3686	115	3544	2913	13	-	3	984,1198,744,	4,988,2186,	115,1510,2800,
CK_88:1458|134b2f58-0f3d-4090-854f-2b047c6972ce	1370	0	1368	TRINITY_DN79163_c0_g1_i3	1723	78	1576	1357	4	-	8	805,370,7,55,17,70,25,12,	2,807,1178,1186,1242,1259,1329,1358,	78,884,1254,1379,1444,1466,1537,1564,
CK_1400:1665|4cf2ce02-7a82-47e0-a004-d5ff617c9fa2	270	0	270	TRINITY_DN164_c0_g1_i3	1822	119	414	270	0	-	2	6,264,	0,6,	119,150,
CK_88:448|3f1b39e3-e848-4332-8824-dd7795ff3e04	366	0	366	TRINITY_DN2598_c3_g1_i1	870	330	694	364	0	+	3	314,46,4,	0,315,362,	330,644,690,
CK_102:1514|967e19c9-da20-47b9-ad6d-25da27474025	1422	3	1417	TRINITY_DN11328_c0_g1_i21	1906	124	1848	1409	5	-	4	736,308,205,165,	5,741,1049,1254,	124,925,1407,1683,
CK_85:793|f440a12f-a3b3-4a0c-b0ce-73e74eee8e7f	713	0	711	TRINITY_DN8641_c1_g1_i2	1934	407	1145	711	0	-	2	54,657,	2,56,	407,488,
CK_99:792|75779dfe-178e-4bee-b3f3-369d95da4656	692	3	692	TRINITY_DN3388_c0_g1_i1	911	42	898	686	3	+	3	226,449,14,	3,229,678,	42,433,884,
CK_104:825|a0dc73dd-fc77-4647-9d8a-e4e282c6bdad	723	0	720	TRINITY_DN4842_c4_g1_i9	1295	371	1283	716	0	+	2	55,661,	0,59,	371,622,
CK_86:5206|051d669d-768f-40cc-86e0-067c488d680c	5142	1	5142	TRINITY_DN7245_c0_g1_i2	6358	102	6158	5121	20	+	3	584,1894,2663,	1,585,2479,	102,1361,3495,
CK_90:360|179a9ff9-4892-4407-8fc8-5b1b96c57045	272	0	272	TRINITY_DN29344_c0_g1_i1	700	0	300	270	2	-	4	5,18,127,122,	0,5,23,150,	0,31,50,178,
CK_109:695|5d92288c-76fb-4b12-9b4f-9d2fe57661f5	588	0	588	TRINITY_DN6213_c0_g2_i1	1767	1074	1672	587	0	+	2	9,578,	0,10,	1074,1094,
CK_104:3424|e87d28e1-f312-475b-a92c-098b4466a22c	3350	11	3344	TRINITY_DN2732_c0_g1_i2	3542	0	3386	3326	7	+	3	35,3190,108,	11,46,3236,	0,36,3278,
CK_89:2633|9c08b3b3-dc02-496c-aeb6-33a75a524f73	2571	6	2571	TRINITY_DN3017_c1_g1_i2	4467	0	4290	2551	0	-	6	7,11,38,8,13,2474,	0,7,18,66,78,91,	0,35,47,100,115,1816,
CK_103:984|90398bc7-0179-4b32-ad1f-e027c0646443	907	0	907	TRINITY_DN13628_c0_g1_i4	1141	0	1123	903	4	-	3	11,714,182,	0,11,725,	0,46,941,
CK_94:1809|aac244c9-1dd0-4b59-b3a4-14246ed71994	1725	0	1715	TRINITY_DN25223_c0_g1_i6	3922	201	2945	1714	1	+	6	88,396,7,741,61,422,	0,88,484,491,1232,1293,	201,394,809,854,1946,2523,
CK_98:934|12a4d804-f603-47a4-9812-8664bea53998	838	1	838	TRINITY_DN21908_c0_g1_i1	1190	161	1004	835	1	-	6	24,203,238,238,95,38,	0,24,227,466,704,799,	161,189,393,631,870,966,
CK_106:316|39498950-7d2b-4b1d-8282-de5fbeadd3fc	213	0	212	TRINITY_DN108741_c0_g1_i1	707	57	368	211	1	-	2	207,5,	1,208,	57,363,
CK_98:310|9a4148f0-29c9-4a71-8e20-b22cfd6ca6a1	212	0	212	TRINITY_DN24878_c3_g2_i1	640	309	525	211	1	-	4	61,3,122,26,	0,61,64,186,	309,371,375,499,
CK_87:1945|0171be8c-54cf-4566-bf78-ebd22d2fec28	1861	0	1853	TRINITY_DN5302_c0_g1_i1	2403	279	2133	1847	6	+	2	16,1837,	0,16,	279,296,
CK_86:460|6a1f9b02-6aab-4cf9-881f-9703baa84a06	377	0	377	TRINITY_DN550_c3_g1_i4	1317	890	1306	375	2	+	3	82,283,12,	0,82,365,	890,987,1294,
CK_93:2011|1563f5a8-3e42-47d6-a5a6-6350b40148f9	1908	3	1902	TRINITY_DN11640_c1_g1_i1	4034	2057	3987	1889	7	+	6	138,96,47,1436,20,159,	3,142,239,287,1723,1743,	2057,2195,2291,2341,3778,3828,
CK_99:1985|8bdd7ff8-fe56-40ea-a536-31b7fb6e040e	1915	0	1910	TRINITY_DN9934_c0_g1_i11	2784	801	2714	1897	10	-	6	7,141,47,18,1688,6,	5,13,154,202,220,1909,	801,808,950,1000,1020,2708,
CK_91:831|2d5d6566-4d36-423d-801d-9519e5b416ba	765	0	765	TRINITY_DN2930_c0_g1_i1	3263	988	1963	760	1	-	5	6,141,14,222,378,	0,6,149,164,387,	988,1132,1273,1287,1585,
CK_86:1033|04137aef-e7ec-405d-9693-b80a46c2e7f6	955	0	954	TRINITY_DN6926_c0_g1_i3	2297	1028	2034	953	1	-	2	655,299,	1,656,	1028,1735,
CK_106:369|dae6adf0-3396-4e5d-94bd-7e388e9b5549	261	0	261	TRINITY_DN51803_c0_g1_i1	1168	769	1029	259	1	+	2	6,254,	0,7,	769,775,
CK_89:511|a348dbc2-e931-4e53-bc89-65f265c748e3	424	0	421	TRINITY_DN949_c1_g1_i2	1628	1165	1586	421	0	+	1	421,	0,	1165,
CK_88:676|84b36bff-e106-4557-805a-7f806edd8e14	592	0	592	TRINITY_DN7682_c0_g1_i8	5200	18	1034	590	2	-	3	243,137,212,	0,243,380,	18,263,822,
CK_104:363|afff40ca-03d7-4655-898a-e9dc8a2b6be0	256	1	256	TRINITY_DN9057_c0_g1_i5	1969	389	1068	255	0	-	2	23,232,	0,23,	389,836,
CK_87:358|bb3a0229-f756-4b06-bee4-cf8b216b6624	277	0	277	TRINITY_DN3388_c0_g1_i1	911	607	904	275	0	+	3	227,40,8,	0,228,269,	607,850,896,
CK_96:578|defb6fd2-d947-4bae-bfc3-e2f20307d52e	481	0	481	TRINITY_DN4742_c2_g1_i4	1218	217	703	481	0	+	3	227,6,248,	0,227,233,	217,448,455,
CK_89:1651|b45c8f2f-9fd8-41ac-873f-824d63139583	1574	1	1568	TRINITY_DN8298_c0_g1_i9	3667	938	3601	1564	3	-	6	11,50,117,557,591,241,	6,17,67,184,741,1332,	938,951,1002,1122,1694,3360,
CK_100:445|90468c21-a8cd-4ef9-9245-d062c7bdc415	345	0	345	TRINITY_DN6668_c1_g1_i1	2168	1569	1915	342	0	+	6	75,7,40,13,43,164,	0,77,84,125,138,181,	1569,1644,1653,1693,1707,1751,
CK_111:896|dd5f1c54-33a5-4b08-9286-b982f3b88275	791	0	791	TRINITY_DN18790_c0_g1_i1	4210	2798	3589	791	0	+	1	791,	0,	2798,
CK_100:1446|ab75ff66-9a25-4bca-b1b6-ae4980a94602	1347	2	1347	TRINITY_DN3018_c1_g1_i15	1622	118	1584	1342	2	+	4	148,1105,31,60,	2,150,1256,1287,	118,386,1491,1524,
CK_109:1481|39deeb20-0edb-4e2b-9be8-d2f0f2687ab5	1385	3	1385	TRINITY_DN16977_c3_g1_i1	3122	132	1612	1378	1	+	3	733,541,105,	3,736,1280,	132,964,1507,
CK_113:561|351f6460-a420-4796-bf3a-cc88996a109a	455	1	455	TRINITY_DN3734_c0_g1_i1	3089	1023	1477	453	1	+	1	454,	1,	1023,
CK_88:1002|1cf65237-e2bf-49e8-b1f9-5fab1caf02d0	911	0	909	TRINITY_DN8919_c0_g1_i23	1631	428	1469	905	4	+	2	473,436,	0,473,	428,1033,
CK_106:1199|88b3a27e-3c59-4ef9-a2b4-2fec18118545	1111	3	1111	TRINITY_DN2252_c1_g1_i1	1258	44	1152	1100	8	+	1	1108,	3,	44,
CK_104:1325|53e2d302-3bdc-4191-ae40-14079e841345	1250	2	1249	TRINITY_DN8228_c0_g1_i2	3586	64	1652	1244	3	+	2	1097,150,	2,1099,	64,1502,
CK_89:366|ebf3fe74-d929-4eec-a1bc-98c6fccbd438	281	0	281	TRINITY_DN10466_c4_g1_i1	2100	1554	1833	279	0	-	2	14,265,	0,16,	1554,1568,
CK_101:1061|c938139f-805b-4c79-84b9-91885c9def9c	966	3	966	TRINITY_DN1439_c0_g1_i14	1476	400	1363	962	1	-	1	963,	0,	400,
CK_101:471|aa7ce563-2cd4-4080-b0a0-bb08977b084f	369	0	368	TRINITY_DN5326_c0_g3_i2	3588	2992	3363	366	0	+	5	79,15,19,185,68,	0,80,95,115,300,	2992,3071,3088,3107,3295,
CK_88:1052|50ef33c3-fb63-4f34-aed2-0f212f96ef5f	970	0	961	TRINITY_DN24919_c0_g1_i1	2266	24	1057	961	0	-	2	793,168,	9,802,	24,889,
CK_44:4505|c2b55215-b12b-4e86-a61a-ab80a2f4a40d	4452	5	4450	TRINITY_DN1474_c0_g1_i1	4550	36	4479	4410	27	-	8	207,3201,364,41,8,44,92,480,	2,209,3410,3775,3818,3828,3872,3967,	36,244,3446,3810,3852,3860,3905,3999,
CK_97:2572|94537f30-a7c8-461c-b783-75297f1a70fb	2500	2	2489	TRINITY_DN6819_c0_g1_i3	3138	0	2487	2484	3	-	1	2487,	11,	0,
CK_109:1013|3852f6c4-9fdc-46d0-b9f2-468ffbf0c974	901	0	899	TRINITY_DN23926_c1_g1_i2	1374	76	1351	896	3	+	3	355,513,31,	0,355,868,	76,805,1320,
CK_106:1889|eddb890e-5fd6-4f46-914b-9b7678912d4c	1799	3	1796	TRINITY_DN17327_c0_g1_i5	3607	43	2294	1787	5	+	5	261,117,651,435,328,	3,264,381,1033,1468,	43,401,877,1530,1966,
CK_96:1727|a662dde8-980b-4eda-84d0-2458cfb5d7f5	1653	4	1652	TRINITY_DN14051_c0_g1_i7	1688	34	1688	1640	7	-	5	8,7,93,1171,368,	1,9,16,109,1281,	34,43,51,146,1320,
CK_93:1433|55fe0942-3a70-417c-a9ba-cc08039840d8	1385	4	1385	TRINITY_DN6872_c0_g2_i2	2020	110	1494	1375	6	+	2	10,1371,	4,14,	110,123,
CK_91:536|f9f3f93f-ff29-4e90-aea0-cf9e2fe9e3c2	439	0	439	TRINITY_DN3210_c0_g1_i1	4932	2944	4538	438	1	+	2	325,114,	0,325,	2944,4424,
CK_109:1559|dac2c75f-d970-4ef6-9103-d6d1300d75dd	1483	1	1481	TRINITY_DN8867_c0_g1_i2	2000	183	1880	1479	1	+	2	63,1417,	1,64,	183,463,
CK_103:418|dc020dd5-7938-4119-b3b6-54d665899901	316	1	315	TRINITY_DN2183_c0_g1_i24	3437	1754	3194	314	0	+	2	283,31,	1,284,	1754,3163,
CK_110:528|1f135da8-3dfb-4ef5-8c76-650a98a8d4b8	424	0	421	TRINITY_DN1484_c0_g1_i2	2013	1400	1821	421	0	+	1	421,	0,	1400,
CK_87:1660|10633e33-0570-4c76-a1ee-991bf9f2c845	1578	0	1578	TRINITY_DN2239_c0_g1_i6	1940	18	1666	1566	11	-	3	7,596,974,	0,7,604,	18,96,692,
CK_90:423|035897e9-8c72-4ff4-bf46-e315999a6d09	337	0	337	TRINITY_DN6660_c0_g1_i3	3583	734	1126	334	3	+	2	191,146,	0,191,	734,980,
CK_103:1221|64a3e362-456a-4179-bb0c-09f8ea92b164	1146	0	1140	TRINITY_DN2889_c0_g1_i44	2431	550	2430	1138	2	+	4	400,94,81,565,	0,400,494,575,	550,1064,1783,1865,
CK_89:361|f5e321be-1ef9-46ce-be85-b2f5b13f5278	273	0	273	TRINITY_DN2539_c0_g1_i6	2733	8	398	272	1	-	2	158,115,	0,158,	8,283,
CK_98:3259|1162f9b8-92a9-48b0-8cd3-7b9dfcad9c4f	3178	3	3174	TRINITY_DN459_c0_g1_i3	3310	84	3255	3167	4	-	1	3171,	4,	84,
CK_104:2558|011848b5-f3ef-4b23-b6d9-d14e1bc166b2	2470	3	2464	TRINITY_DN8035_c0_g1_i2	2692	142	2672	2459	1	+	5	810,326,249,412,663,	3,813,1139,1389,1801,	142,954,1281,1530,2009,
CK_88:305|14feca87-4c84-42bc-a189-8a68087f64d9	213	0	213	TRINITY_DN15407_c2_g1_i3	963	703	916	213	0	+	1	213,	0,	703,
CK_106:606|8cb9c52a-d202-4d43-8456-5b83a5e325f4	500	1	500	TRINITY_DN7898_c1_g1_i8	2525	994	1509	495	4	-	2	37,462,	0,37,	994,1047,
CK_104:813|dfa5897e-634f-4096-8476-8b838fc8d70c	710	0	710	TRINITY_DN12728_c1_g1_i5	4592	858	1917	705	4	-	5	537,11,74,79,8,	0,537,548,623,702,	858,1396,1409,1483,1909,
CK_103:2224|6aa0edcf-6f1e-4396-852e-6427954f3885	2133	2	2133	TRINITY_DN4346_c1_g1_i4	5648	216	3256	2121	4	+	7	4,1081,105,7,48,29,851,	2,6,1087,1195,1203,1251,1282,	216,221,2211,2320,2327,2376,2405,
CK_89:960|0eb29e0b-9852-4ce5-980e-336c67e22ee1	877	0	877	TRINITY_DN13628_c0_g1_i4	1141	3	1063	870	7	-	3	757,98,22,	0,757,855,	3,941,1041,
CK_110:433|eee30d91-e62e-4a22-a8fe-567de1550ab0	326	0	326	TRINITY_DN55_c4_g1_i5	3524	0	349	324	2	-	3	8,238,80,	0,8,246,	0,30,269,
CK_90:891|576d111f-564f-49de-8355-6e6a9d9bd1b5	810	0	809	TRINITY_DN39914_c0_g3_i3	3047	101	908	802	0	+	7	12,17,12,88,65,74,534,	0,12,30,43,131,201,275,	101,115,132,144,233,298,374,
CK_88:865|67c00852-3909-4d11-98dc-1df768b7c34b	778	0	778	TRINITY_DN16532_c0_g1_i6	1534	65	1520	774	2	+	6	327,51,75,39,260,24,	0,327,378,454,494,754,	65,1068,1120,1195,1234,1496,
CK_84:757|2ffc06f2-31e6-436b-95b9-d740ccfc4fb0	685	3	685	TRINITY_DN5801_c0_g1_i1	1737	784	1670	680	2	-	4	302,115,228,37,	0,302,417,645,	784,1192,1399,1633,
CK_92:383|c9d38f70-4afd-4709-853f-4c42e76eed25	296	0	296	TRINITY_DN5668_c0_g1_i1	467	88	446	294	2	-	2	290,6,	0,290,	88,440,
CK_92:910|89607d5a-99d3-4da3-80cd-d5c4af241ebd	817	0	813	TRINITY_DN12233_c0_g1_i1	826	7	820	809	4	+	1	813,	0,	7,
CK_108:1391|0da02d16-8558-4731-879c-0747be671319	1284	3	1284	TRINITY_DN6380_c0_g1_i1	1834	174	1712	1276	4	+	2	829,451,	3,833,	174,1261,
CK_107:551|82e8ad0c-6c9a-4de1-96ca-fbd055403731	444	0	444	TRINITY_DN1161_c2_g1_i1	931	412	854	440	1	-	2	433,8,	0,436,	412,846,
CK_91:538|732dde40-8756-44be-962d-2f72847bf369	447	0	447	TRINITY_DN31183_c6_g1_i1	562	72	521	443	4	+	3	209,30,208,	0,209,239,	72,282,313,
CK_103:1512|cef8d2d7-23bd-47d7-a13a-7cb6b567bd26	1431	2	1431	TRINITY_DN3410_c0_g1_i1	2398	676	2154	1424	0	-	2	1102,322,	0,1107,	676,1832,
CK_90:1477|a22fe5c1-97a6-47ce-a078-3d2dd1707dc2	1373	5	1372	TRINITY_DN855_c1_g1_i1	1423	0	1382	1360	3	+	5	150,15,1102,61,35,	5,155,172,1274,1337,	0,151,166,1286,1347,
CK_100:539|94097c37-08ef-4a4f-b4c5-8ab2471f3816	438	2	438	TRINITY_DN28870_c2_g1_i1	901	248	897	434	2	+	4	70,4,341,21,	2,72,76,417,	248,482,513,876,
CK_101:791|0fbaae2a-5568-4927-8ffd-07ec3eec8fa8	693	0	693	TRINITY_DN25537_c1_g1_i1	1552	295	986	688	2	-	3	9,580,101,	0,11,592,	295,305,885,
CK_85:1519|46abb775-05d5-406f-be09-f4faf960f315	1438	0	1438	TRINITY_DN3785_c0_g1_i19	8647	2120	4390	1434	4	+	3	39,332,1067,	0,39,371,	2120,2698,3323,
CK_91:1048|fdd53e4c-d2c7-4fbf-a7d9-2b1d7492de7a	974	0	969	TRINITY_DN9928_c0_g1_i18	1160	0	1154	965	4	-	2	810,159,	5,815,	0,995,
CK_90:1806|19a01e0c-b0ae-4173-84ae-817ec09e6ecc	1738	0	1733	TRINITY_DN13329_c1_g1_i1	1968	130	1865	1725	7	-	3	1717,7,8,	5,1723,1730,	130,1847,1857,
CK_92:513|49f401cb-a06a-4d0a-a2ba-338866f580cd	432	0	431	TRINITY_DN350_c0_g1_i1	2416	738	2387	431	0	-	2	404,27,	1,405,	738,2360,
CK_104:1598|d8e78fb0-1265-4ea9-aabc-7ed23f9691f9	1517	1	1515	TRINITY_DN7671_c0_g1_i2	1736	159	1667	1503	3	+	6	302,1071,46,73,8,6,	1,304,1379,1425,1500,1509,	159,461,1533,1580,1653,1661,
CK_89:327|d730bc49-5bb0-4fce-a5d7-1368f53bfece	238	0	238	TRINITY_DN35505_c0_g1_i1	307	15	260	236	1	+	5	28,32,27,81,69,	0,28,60,87,169,	15,44,78,110,191,
CK_104:928|ccc79e71-c467-4ee4-b04d-96a62f27f17a	833	2	833	TRINITY_DN2905_c0_g1_i6	1845	289	1786	827	4	+	3	152,643,36,	2,154,797,	289,444,1750,
CK_107:1948|656b7b6d-c0c7-4ccc-a3bc-b1f29f5ac330	1865	3	1862	TRINITY_DN4083_c0_g1_i6	2369	276	2302	1851	4	-	9	6,58,6,145,1024,491,113,8,4,	3,11,70,76,221,1245,1736,1849,1858,	276,282,344,351,503,1530,2170,2290,2298,
CK_88:321|740ccc8e-f4c7-4e5d-9f92-e7c5d8269a9e	233	0	233	TRINITY_DN17222_c1_g1_i1	1655	827	1064	231	1	-	4	6,138,7,81,	0,6,145,152,	827,835,973,983,
CK_90:462|91fc36b7-1464-4fc0-8575-78882d06fbae	376	0	373	TRINITY_DN2803_c0_g2_i1	2361	1528	1907	373	0	+	2	225,148,	0,225,	1528,1759,
CK_103:1131|7d77b9ae-3049-4c84-b40d-aa52096b2560	1034	0	1030	TRINITY_DN1405_c0_g2_i3	3705	13	1387	1027	1	-	5	586,188,105,117,32,	4,590,778,884,1002,	13,863,1133,1238,1355,
CK_108:668|a67b3ead-a5e5-4d72-b4ca-9d641938049f	559	4	559	TRINITY_DN10758_c0_g2_i1	3516	2825	3384	554	1	-	4	65,301,184,5,	0,65,366,550,	2825,2891,3194,3379,
CK_103:500|93fe9cda-f3b0-4ced-b0b3-c310abf07c88	394	0	394	TRINITY_DN69990_c0_g3_i2	1216	719	1117	392	0	-	8	57,9,25,163,50,14,24,50,	0,58,68,93,256,306,320,344,	719,776,785,811,976,1027,1042,1067,
CK_103:944|ad320381-9d37-4174-b80c-c54e38850950	852	1	849	TRINITY_DN33511_c0_g1_i4	937	32	918	844	2	+	4	546,159,27,114,	1,547,706,735,	32,612,774,804,
CK_79:648|de82f34c-36bb-45ee-8898-a33e70fcebb5	570	0	570	TRINITY_DN133_c5_g1_i11	1830	209	1764	568	2	+	3	122,184,264,	0,122,306,	209,447,1500,
CK_98:754|0af52527-58b0-489c-9bfb-0c1cb5e42eec	671	3	671	TRINITY_DN10873_c1_g1_i5	1430	697	1376	667	1	-	2	590,78,	0,590,	697,1298,
CK_100:659|6e068520-8521-4bd7-a7a4-e536b091f269	564	0	561	TRINITY_DN27509_c0_g1_i1	3461	1068	1628	559	1	+	2	370,190,	0,371,	1068,1438,
CK_47:2555|f7bf8ccc-3e40-45d2-89e5-c339f1ef3683	2513	1	2509	TRINITY_DN8899_c0_g1_i1	2870	186	2806	2489	14	+	11	500,240,56,41,138,15,38,63,66,1203,143,	1,502,742,798,839,977,992,1031,1095,1163,2366,	186,686,928,986,1028,1169,1185,1227,1290,1357,2663,
CK_97:2943|fd3280bc-1fd2-49ef-a57c-aab0a9b9b74c	2866	2	2866	TRINITY_DN7968_c0_g1_i1	3821	63	3602	2861	3	+	3	2667,190,7,	2,2669,2859,	63,3030,3595,
CK_99:1299|4f38f31b-31a9-4e3a-891f-2f956d07c0eb	1210	3	1207	TRINITY_DN20378_c0_g1_i6	2124	596	1899	1204	0	-	2	90,1114,	3,93,	596,785,
CK_105:518|f4cceae3-9143-4dbb-8d2c-814f9c80687e	413	1	413	TRINITY_DN11971_c4_g1_i1	1962	548	961	409	2	-	4	128,198,70,15,	0,128,327,397,	548,677,875,946,
CK_102:1343|73fdbd2a-3a17-48fd-b69f-288a655274a0	1269	3	1269	TRINITY_DN2341_c0_g1_i1	1616	0	1560	1262	4	-	3	16,354,896,	0,16,370,	0,231,664,
CK_103:3043|f43e9396-9b58-482f-bf2e-d85c7be738cb	2961	20	2960	TRINITY_DN419_c0_g2_i1	3502	0	3031	2934	6	+	3	67,160,2713,	20,87,247,	0,68,318,
CK_96:1792|c86a3f13-8563-4333-ad18-fb5ff8246d39	1708	0	1702	TRINITY_DN2374_c0_g1_i2	2370	233	2294	1696	6	-	6	120,181,1080,149,70,102,	6,126,307,1387,1536,1606,	233,356,642,1759,2001,2192,
CK_88:672|4f470378-d827-4c74-9acb-ba646fc75d6b	593	0	592	TRINITY_DN25088_c0_g2_i1	3221	865	1697	591	1	+	2	104,488,	0,104,	865,1209,
CK_89:434|c791234e-14c1-4e8e-a07a-71c97b55087c	344	0	342	TRINITY_DN40334_c1_g1_i1	1755	1091	1433	342	0	-	1	342,	2,	1091,
CK_91:1835|f42f75d2-451f-4de9-bbd4-c1da55bb6442	1771	0	1771	TRINITY_DN20231_c0_g1_i1	2589	95	2572	1771	0	+	3	182,1583,6,	0,182,1765,	95,972,2566,
CK_92:2409|c3a85299-b05a-46ac-92b0-1551f3d4b0c5	2332	1	2331	TRINITY_DN883_c0_g1_i1	2521	111	2467	2326	4	-	3	2076,100,154,	1,2077,2177,	111,2212,2313,
CK_101:4663|70186257-598a-4815-9d68-5a3b7650f394	4605	3	4599	TRINITY_DN7633_c0_g1_i1	5015	14	4964	4563	21	-	7	26,9,17,9,153,3463,907,	6,33,42,60,78,232,3695,	14,40,50,67,86,239,4057,
CK_102:1371|4aab1243-4337-44d9-a88d-64592f329ee3	1272	3	1272	TRINITY_DN13002_c0_g1_i2	1311	33	1302	1265	0	-	3	130,9,1126,	0,131,143,	33,163,176,
CK_90:578|b8c8fdf3-e7cf-4a0f-8841-c8dbf3fe06ea	493	0	493	TRINITY_DN9371_c0_g1_i3	1170	216	1150	489	4	-	3	5,375,113,	0,5,380,	216,280,1037,
CK_109:360|873f9c54-ea77-4c25-8510-4d12e9539d3b	251	0	249	TRINITY_DN58334_c0_g2_i4	2260	10	261	249	0	-	2	47,202,	2,49,	10,59,
CK_102:540|39632529-d5c4-4b95-bd77-664d80118e49	438	2	438	TRINITY_DN15172_c0_g2_i2	2144	1625	2066	434	1	-	4	112,103,64,156,	0,112,215,280,	1625,1739,1843,1910,
CK_90:1457|9f67136e-4429-4937-97c0-779d41e0498e	1391	0	1387	TRINITY_DN20128_c0_g1_i1	1620	102	1489	1386	1	-	1	1387,	4,	102,
CK_101:540|b4a1f5bc-3a2f-48d3-a3ea-ab82fcc658a7	436	0	435	TRINITY_DN7804_c0_g1_i3	2361	195	2353	432	2	+	7	139,210,11,45,5,15,9,	0,139,349,361,406,411,426,	195,2051,2262,2273,2319,2327,2344,
CK_83:975|2db16806-150d-44ec-b32d-3aa065bcf182	895	5	895	TRINITY_DN843_c0_g1_i3	2779	27	1852	888	0	+	3	463,351,74,	5,468,821,	27,934,1778,
CK_99:560|3459a078-56df-4ff8-85de-74edf812f1dc	462	0	462	TRINITY_DN4930_c0_g1_i29	6371	487	981	458	2	+	3	124,164,172,	0,124,290,	487,644,809,
CK_107:2281|06dfae88-f49b-4d3e-9526-8a4bf472e4e9	2206	4	2205	TRINITY_DN1025_c0_g1_i13	4026	39	2422	2190	4	+	7	33,1050,256,242,74,466,73,	4,41,1091,1349,1591,1666,2132,	39,77,1128,1388,1631,1705,2349,
CK_90:3054|789d1e06-cc5b-4819-bc41-2dff501d05d0	3013	4	3013	TRINITY_DN4685_c0_g1_i2	3724	173	3327	2992	17	-	3	399,1020,1590,	0,399,1419,	173,665,1737,
CK_100:730|753f0c24-3f15-455c-a35f-1cbc79c39d1c	627	0	627	TRINITY_DN684_c3_g1_i4	3354	155	2436	624	3	-	2	250,377,	0,250,	155,2059,
CK_83:1011|484387f9-dc05-46ef-bd54-7d72894c84e5	962	0	958	TRINITY_DN2661_c0_g1_i7	1743	122	1093	954	1	+	2	12,943,	0,15,	122,150,
CK_107:515|a4578600-093a-45f5-a61b-32b512e1e923	403	3	403	TRINITY_DN6600_c0_g1_i5	1114	73	910	400	0	+	4	81,4,310,5,	3,84,88,398,	73,256,375,905,
CK_88:298|fba71008-2ccf-4a5a-bf0f-bfe1ebdd02ea	210	0	210	TRINITY_DN6230_c0_g1_i2	985	591	800	208	1	+	2	198,11,	0,199,	591,789,
CK_102:412|7feeb89f-293f-457e-9ffb-debd0c11ffe3	308	0	307	TRINITY_DN29902_c1_g1_i1	720	125	433	305	2	-	2	169,138,	1,170,	125,295,
CK_108:365|aa8b90bb-1d12-4115-9b4b-4e11a713aa0b	259	0	259	TRINITY_DN3388_c0_g1_i1	911	606	902	258	0	+	4	10,235,7,6,	0,11,246,253,	606,651,888,896,
CK_89:753|f944c9b3-6858-4b77-a016-e7036429e157	673	0	669	TRINITY_DN6636_c0_g1_i2	1580	242	931	668	1	-	2	92,577,	4,96,	242,354,
CK_102:700|30eecc4b-22b0-4581-b59e-5744651d5a60	601	0	601	TRINITY_DN15475_c0_g1_i2	1574	728	1326	596	2	+	2	411,187,	0,414,	728,1139,
CK_112:665|978573c9-7a69-44cd-b2d7-988fbe2d83c2	556	1	555	TRINITY_DN26567_c0_g1_i3	2205	505	1075	554	0	-	2	543,11,	1,544,	505,1064,
CK_90:1394|014df502-371b-4c2f-8831-5704cfae27d7	1305	0	1305	TRINITY_DN15245_c0_g1_i1	1506	0	1501	1299	6	-	3	6,1077,222,	0,6,1083,	0,137,1279,
CK_101:317|b4151996-e65b-4bfd-a52f-da528d0278fe	214	0	214	TRINITY_DN1162_c0_g1_i4	5886	5622	5839	212	1	+	5	17,4,30,8,154,	0,18,22,52,60,	5622,5639,5644,5675,5685,
CK_103:1032|2c78ff66-8503-4288-9289-a57df359b218	921	2	921	TRINITY_DN141_c0_g1_i3	4102	2706	3820	914	5	-	2	681,238,	0,681,	2706,3582,
CK_94:348|63d88313-b012-4261-9cb0-880de571e9e0	253	0	253	TRINITY_DN27827_c0_g1_i1	729	334	588	251	1	-	3	48,39,165,	0,49,88,	334,382,423,
CK_91:569|69e29323-96ef-40ec-931c-4978ec33f705	483	0	483	TRINITY_DN539_c0_g2_i2	1017	19	615	480	3	-	2	372,111,	0,372,	19,504,
CK_110:2495|e8a7f8dc-170d-4684-a625-3f8eceab3499	2404	2	2404	TRINITY_DN7803_c0_g1_i1	2717	244	2705	2381	9	+	6	344,1158,770,7,89,22,	2,350,1508,2285,2293,2382,	244,590,1807,2585,2592,2683,
CK_96:1683|721c76d2-c687-4038-b2d7-6f1c5521d505	1588	0	1588	TRINITY_DN3543_c0_g1_i1	1614	4	1599	1575	9	+	6	49,890,422,124,94,5,	0,49,939,1365,1489,1583,	4,55,946,1369,1494,1594,
CK_94:554|a6110b79-0a8e-4df9-b3d7-cd8214491f71	468	0	468	TRINITY_DN5654_c0_g1_i2	834	0	496	465	2	-	4	8,115,8,336,	0,8,124,132,	0,35,150,160,
CK_105:3750|dc2ece56-b49c-4b95-bf2c-4087f7294db5	3663	3	3663	TRINITY_DN64_c0_g1_i4	4531	21	4444	3652	8	-	4	987,2124,396,153,	0,987,3111,3507,	21,1595,3782,4291,
CK_90:383|8f74475c-3e85-40c3-ac88-8ecb6dcc5368	296	0	296	TRINITY_DN7014_c0_g1_i2	2046	327	1082	294	2	-	2	6,290,	0,6,	327,792,
CK_89:936|e853f541-58bd-47d2-b0f8-748298f28e04	847	0	845	TRINITY_DN8530_c1_g1_i2	2038	870	1823	844	1	+	2	134,711,	0,134,	870,1112,
CK_96:803|3afdf531-6f72-4e5a-9002-8541eb9babb1	710	0	708	TRINITY_DN7344_c0_g1_i1	976	214	922	704	4	-	1	708,	2,	214,
CK_102:1212|d5c36934-9e3f-4d9f-af1d-b02ab1a5a49c	1128	2	1128	TRINITY_DN1345_c0_g1_i1	1251	94	1220	1124	2	+	1	1126,	2,	94,
CK_104:1158|d5923b93-5b22-4ad6-8f55-4ed4827aa3bf	1050	0	1050	TRINITY_DN7261_c0_g1_i1	1267	129	1233	1044	1	-	5	306,123,589,23,4,	0,306,429,1023,1046,	129,478,612,1205,1229,
CK_109:1286|1d4061f2-23f0-4bca-8226-bfbf290f2384	1202	1	1201	TRINITY_DN2900_c0_g1_i4	1787	367	1767	1190	9	+	3	182,7,1010,	1,184,191,	367,552,757,
CK_102:880|44c0a45c-1013-4d4f-a0bc-577cb2817f46	781	0	781	TRINITY_DN7992_c0_g1_i3	4429	844	3345	776	5	+	3	326,450,5,	0,326,776,	844,2792,3340,
CK_97:341|da8cf00b-e23a-4aed-86ed-cdf96c6c5dc4	243	0	243	TRINITY_DN2525_c0_g2_i1	1083	132	620	241	2	+	2	49,194,	0,49,	132,426,
CK_94:767|2d1dac7f-a6ab-4852-9d80-8de19026e1eb	676	0	675	TRINITY_DN16421_c0_g1_i3	2823	1193	1893	673	1	+	4	5,25,77,567,	0,6,31,108,	1193,1198,1248,1326,
CK_90:1556|30d8beaf-954c-49f3-b763-338b5b7e49c7	1473	0	1466	TRINITY_DN15644_c0_g1_i8	1821	139	1787	1459	5	-	4	820,541,98,5,	7,827,1370,1468,	139,1141,1683,1782,
CK_90:998|9558a599-07a9-42e0-8ab0-d6c63dd3d3b1	909	0	904	TRINITY_DN8732_c0_g1_i1	1399	10	1296	902	2	-	2	688,216,	5,693,	10,1080,
CK_104:1534|842a29cb-ff6f-41f2-8188-26598ac4c211	1426	4	1422	TRINITY_DN4552_c2_g1_i5	1608	189	1608	1414	4	-	2	21,1397,	4,25,	189,211,
CK_110:2042|c25b5ced-c5e3-4e53-9c18-aec08735ac4b	1941	0	1933	TRINITY_DN26326_c0_g1_i6	2597	0	2196	1927	6	-	3	35,1795,103,	8,43,1838,	0,36,2093,
CK_94:2273|8c3b35ef-40bd-4f31-8261-de6fb28d4b5a	2195	0	2192	TRINITY_DN9358_c0_g2_i10	2248	35	2232	2188	4	+	3	485,1490,217,	0,485,1975,	35,524,2015,
CK_85:1000|f73aa91e-2beb-4017-b4df-8bf48699034b	919	0	918	TRINITY_DN30616_c0_g1_i2	1384	108	1027	917	1	-	2	621,297,	1,622,	108,730,
CK_112:545|e5bd6396-fae6-4d76-bfcb-765ba063130d	433	0	433	TRINITY_DN38977_c0_g1_i1	597	47	490	429	0	-	6	8,66,26,93,207,29,	0,8,74,101,194,404,	47,63,130,156,250,461,
CK_89:1998|81fee3d5-8c60-41ea-b2a6-cfb16d4d1155	1939	0	1935	TRINITY_DN5431_c0_g1_i2	2131	20	2099	1924	8	-	7	33,107,537,1105,61,18,71,	4,37,145,682,1788,1850,1868,	20,60,167,836,1941,2009,2028,
CK_90:2211|37651a52-32da-4971-84ea-0fb976257a4a	2144	3	2144	TRINITY_DN5486_c0_g1_i16	3952	1616	3930	2137	4	-	4	1577,73,484,7,	0,1577,1650,2134,	1616,3194,3438,3923,
CK_103:2674|b2fcdc39-3d4f-4afb-91b6-a7d5c0ee1775	2578	13	2575	TRINITY_DN4299_c0_g1_i1	2756	125	2756	2561	1	-	2	222,2340,	3,225,	125,416,
CK_94:565|0ebf3253-13ae-47d7-9758-7b21d0862717	483	0	483	TRINITY_DN20929_c0_g1_i1	568	14	497	483	0	+	1	483,	0,	14,
CK_87:724|e694bd3e-699f-40bf-8301-e131272a9d7f	646	0	646	TRINITY_DN11872_c2_g5_i3	2131	664	1308	641	3	-	2	177,467,	0,179,	664,841,
CK_99:696|42c83f57-1095-49a3-9c05-3e9f709acd4b	597	3	597	TRINITY_DN133_c3_g1_i2	1063	97	910	592	2	+	2	89,505,	3,92,	97,405,
CK_106:1715|23182c2f-9735-4d2e-a0e5-feb582370868	1627	0	1616	TRINITY_DN8926_c0_g1_i4	4129	273	1976	1613	3	+	2	1280,336,	0,1280,	273,1640,
CK_100:869|78b58fe9-ce57-443b-ad28-436215c3ad48	763	3	762	TRINITY_DN3261_c2_g1_i1	949	8	770	756	3	-	2	60,699,	1,61,	8,71,
CK_92:2055|eb637f63-91e7-4475-9bb0-03e5e4f74715	2010	0	2010	TRINITY_DN16319_c0_g4_i1	3980	67	2086	2003	4	+	7	13,478,177,1231,81,21,6,	0,13,491,668,1900,1982,2004,	67,82,561,741,1975,2056,2080,
CK_89:649|042e5414-c1e6-4e78-b380-d73837620c10	589	0	587	TRINITY_DN5363_c2_g1_i17	2145	1465	2129	584	3	+	2	72,515,	0,72,	1465,1614,
CK_99:3227|cb373c8d-d43f-469c-bcb4-edfffe6edf61	3147	1	3136	TRINITY_DN6135_c0_g2_i4	3777	327	3591	3120	9	+	12	571,1868,41,442,23,9,20,6,4,30,83,32,	1,572,2441,2482,2925,2948,2957,2977,2984,2988,3018,3104,	327,1024,2892,2934,3376,3400,3410,3431,3437,3445,3476,3559,
CK_99:953|748db4d6-1888-4235-8bfc-0ceb2a14521c	855	0	855	TRINITY_DN19672_c0_g1_i3	1304	280	1159	848	4	-	9	283,162,3,42,15,9,123,153,62,	0,283,445,448,490,505,517,640,793,	280,564,728,737,780,798,814,943,1097,
CK_104:378|c47aaeef-e4d5-45d3-96d8-679ff053ea86	274	0	274	TRINITY_DN4057_c4_g1_i1	556	2	282	272	2	+	3	165,35,74,	0,165,200,	2,172,208,
CK_95:735|2b2b0a34-ca5d-4f86-bd75-ecda27091c83	646	0	646	TRINITY_DN445_c5_g1_i3	1116	469	1112	641	2	+	2	638,5,	0,641,	469,1107,
CK_89:3393|33bfcb1c-7bf5-485d-87a0-bb8a4a92953c	3310	0	3307	TRINITY_DN282_c0_g1_i2	4125	16	3327	3277	8	-	6	8,28,58,457,324,2410,	3,12,40,99,575,900,	16,24,54,115,593,917,
CK_113:2008|3799f091-7480-4921-a2b8-d764d66ed927	1898	3	1898	TRINITY_DN241_c0_g1_i2	2586	157	2362	1883	3	+	3	89,1736,61,	3,92,1837,	157,450,2301,
CK_88:1108|ab0e7042-f1a4-4bb3-9ba6-6e0a0b6e0960	1020	0	1020	TRINITY_DN15370_c0_g2_i1	1208	33	1189	1013	7	+	4	181,18,666,155,	0,181,199,865,	33,215,235,1034,
CK_68:1139|3d3154f7-9e5f-4248-af5e-d94f210ead75	1071	2	1070	TRINITY_DN3196_c0_g2_i5	2283	67	2089	1063	5	-	3	866,152,50,	1,867,1019,	67,1779,2039,
CK_106:960|418b509e-8402-4fc4-978c-25831ce9b6f0	853	0	853	TRINITY_DN1857_c0_g1_i11	3504	1108	3498	846	4	+	5	7,398,423,6,16,	0,7,405,828,837,	1108,1381,3051,3476,3482,
CK_103:560|d7a7bc73-b1e8-474f-88e9-09ca74aefe15	457	0	457	TRINITY_DN156896_c0_g1_i1	791	103	561	454	3	-	2	167,290,	0,167,	103,271,
CK_91:1632|1bf130a2-d33e-466c-b988-6a1621247c05	1557	0	1551	TRINITY_DN6470_c0_g1_i1	2136	120	1875	1550	1	-	3	179,572,800,	6,185,757,	120,378,1075,
CK_105:1236|d41db98a-8bda-4d1b-a34a-96799645678b	1131	1	1129	TRINITY_DN6887_c3_g1_i1	2423	29	2423	1122	4	+	6	818,59,26,101,56,66,	1,819,879,905,1007,1063,	29,2110,2172,2199,2300,2357,
CK_90:337|4cdabb13-8eac-4100-ae42-c9bcf004d1c8	247	0	247	TRINITY_DN29373_c0_g3_i1	615	254	520	245	2	+	6	14,29,81,31,57,35,	0,14,43,124,155,212,	254,270,300,384,427,485,
CK_97:391|feab683a-b994-4361-a8e2-b68527175e14	294	0	294	TRINITY_DN23860_c0_g1_i2	650	308	603	292	1	+	4	112,48,20,113,	0,113,161,181,	308,420,469,490,
CK_103:1957|cd41d408-f6af-4070-8584-55690f78a8ff	1860	0	1858	TRINITY_DN2372_c0_g1_i29	2584	239	2330	1854	4	+	3	1196,106,556,	0,1196,1302,	239,1516,1774,
CK_87:297|1c52f841-2c48-4ff9-b5d3-5fe02c0b7646	211	0	210	TRINITY_DN26293_c0_g3_i1	2207	1805	2032	210	0	+	2	118,92,	0,118,	1805,1940,
CK_99:749|8747a9c3-1275-4ab7-9c3d-cff927d21f75	653	0	651	TRINITY_DN133_c3_g1_i2	1063	103	873	647	4	+	2	606,45,	0,606,	103,828,
CK_98:522|714f2046-afe7-49a6-942c-0e93d168dbd5	430	0	430	TRINITY_DN3180_c0_g1_i4	2993	44	579	429	1	-	2	326,104,	0,326,	44,475,
CK_95:988|19697d0d-4f54-4294-981c-6cb7af7abe98	886	0	883	TRINITY_DN18466_c0_g1_i2	997	42	926	880	3	+	2	766,117,	0,766,	42,809,
CK_108:1501|bb33e5e2-056d-4c17-8e59-48df9d1c09b8	1394	2	1392	TRINITY_DN2774_c0_g1_i6	1602	85	1544	1383	3	+	4	106,18,231,1031,	2,109,130,361,	85,191,210,513,
CK_90:2942|1ab53113-e367-461f-9674-e49b68867044	2871	4	2866	TRINITY_DN9614_c0_g1_i5	3152	64	3143	2851	4	-	7	17,56,42,2414,147,9,170,	5,25,81,123,2537,2684,2697,	64,82,142,224,2640,2961,2973,
CK_104:371|e218672b-559d-4c49-bc2a-75feb3af6d4a	267	0	267	TRINITY_DN29087_c1_g1_i1	403	5	277	266	1	+	6	15,41,6,147,34,24,	0,15,56,62,209,243,	5,21,63,70,218,253,
CK_105:2092|90d59d04-a203-480c-928c-52541bc4d777	2011	2	2011	TRINITY_DN7414_c0_g1_i3	2230	37	2144	1998	2	+	3	22,193,1785,	2,33,226,	37,66,359,
CK_98:1143|42c8814a-a76b-4385-b705-db78f65857c5	1056	2	1053	TRINITY_DN19497_c0_g1_i4	1421	172	1411	1049	1	-	3	937,17,96,	3,940,958,	172,1281,1315,
CK_108:364|575d09f2-43d0-4d18-adc6-fbc6ef23b8c4	256	0	255	TRINITY_DN6518_c0_g1_i2	2937	87	975	254	0	-	3	56,158,40,	1,58,216,	87,143,935,
CK_87:801|3df9a71f-58af-4ef6-8e63-2c7052647e3d	723	2	722	TRINITY_DN2609_c0_g3_i2	1587	552	1293	719	0	+	2	674,45,	2,677,	552,1248,
CK_97:766|960303fb-4a4c-415b-90ac-170b64eea1cb	669	1	667	TRINITY_DN839_c0_g1_i12	3209	33	702	664	1	-	3	23,57,585,	2,26,83,	33,59,117,
CK_105:5406|3c1bc85b-650a-487b-b320-df4bb380adbe	5367	0	5360	TRINITY_DN2297_c0_g1_i25	5840	16	5831	5332	12	-	10	2415,116,166,49,2493,14,6,27,16,42,	7,2422,2538,2709,2759,5253,5268,5275,5304,5325,	16,2784,3008,3178,3230,5725,5739,5745,5772,5789,
CK_94:778|8e5bc8a9-d941-4fe6-88c6-54df678208a7	681	0	681	TRINITY_DN393_c0_g2_i1	2209	898	1602	680	0	-	3	258,7,415,	0,259,266,	898,1177,1187,
CK_99:1705|55f2aa73-56a7-4c71-9e03-27d8d542ed96	1607	14	1607	TRINITY_DN3914_c0_g1_i1	1677	67	1661	1591	1	-	3	18,1543,31,	0,18,1562,	67,87,1630,
CK_101:370|ef207494-2f6f-4a9d-86b3-22655b30090f	268	0	268	TRINITY_DN26706_c0_g2_i1	933	392	660	266	0	-	3	16,56,194,	0,16,74,	392,409,466,
CK_101:766|c32607da-402e-48ed-aec0-95a8b16bd38d	691	2	691	TRINITY_DN1578_c0_g1_i5	2514	31	2340	688	0	-	4	248,70,38,332,	0,248,318,357,	31,1891,1970,2008,
CK_49:1813|78888d48-5829-409e-87e9-ce0271dbdf7c	1787	8	1787	TRINITY_DN1773_c4_g1_i1	3196	6	1901	1777	2	-	2	1677,102,	0,1677,	6,1799,
CK_104:2130|dedc2eb5-24b6-4f64-b784-14a4f406f006	2031	3	2016	TRINITY_DN1472_c4_g1_i1	2408	136	2149	2011	2	-	1	2013,	15,	136,
CK_88:880|6abe56c6-9aab-44d5-9d8c-ff5f66af87af	791	4	791	TRINITY_DN3157_c0_g1_i2	1327	7	997	787	0	+	2	779,8,	4,783,	7,989,
CK_97:3640|22686831-4aaf-4c1f-b7c9-3036743e5a06	3604	2	3601	TRINITY_DN643_c3_g1_i1	3695	51	3675	3594	5	+	3	1240,2230,129,	2,1242,3472,	51,1312,3546,
CK_77:3510|745848e7-9d19-452f-8c10-51c681b82a58	3469	11	3464	TRINITY_DN9699_c0_g1_i1	3681	31	3592	3439	11	+	5	875,361,816,1194,204,	11,887,1248,2066,3260,	31,906,1369,2192,3388,
CK_59:560|2a927f04-90c6-4716-a2d8-77a9e8dfd7d9	506	1	502	TRINITY_DN2317_c0_g1_i18	4134	2134	2794	501	0	-	2	43,458,	4,47,	2134,2336,
CK_104:3498|4959460f-5d1a-411c-8f42-74cac9f361c6	3417	3	3417	TRINITY_DN384_c1_g1_i5	3523	11	3456	3387	21	-	3	944,113,2351,	0,947,1063,	11,990,1105,
CK_91:1427|663dec29-dcc1-429c-a9ff-792bfdda0d9c	1333	0	1333	TRINITY_DN13354_c0_g1_i12	5175	954	2560	1332	0	-	3	262,1050,20,	0,262,1313,	954,1490,2540,
CK_91:1469|c6b313f9-b8fb-4b8b-8692-af624ecee658	1382	0	1378	TRINITY_DN4152_c0_g2_i1	4247	281	4183	1372	5	-	3	920,11,446,	4,925,936,	281,1206,3737,
CK_89:454|8886467b-476f-4587-ae11-82591c521817	369	0	369	TRINITY_DN26137_c0_g1_i2	10203	7678	8054	368	1	+	2	364,5,	0,364,	7678,8049,
CK_88:707|9b186cdc-9557-42d2-a3cf-e066bdcc0897	625	0	625	TRINITY_DN287_c6_g1_i8	2694	1917	2543	621	2	-	6	39,27,19,146,232,160,	0,40,67,86,232,465,	1917,1956,1984,2004,2151,2383,
CK_101:1445|8451e9bf-672d-4c7d-855d-78e9b6b73181	1341	3	1341	TRINITY_DN7453_c0_g1_i4	2234	245	2070	1331	7	+	3	660,90,588,	3,663,753,	245,1271,1482,
CK_101:1104|47527257-49c1-4111-98fd-d7f737a0d990	1016	0	1016	TRINITY_DN10778_c0_g1_i14	2444	1032	2322	1013	1	+	4	37,728,243,6,	0,37,765,1010,	1032,1344,2073,2316,
CK_110:2140|7d82f157-d60f-42b4-8f9f-1eb0860801e3	2034	3	2031	TRINITY_DN11842_c0_g1_i2	2168	34	2089	2024	2	+	6	9,1093,4,257,552,111,	3,12,1107,1111,1368,1920,	34,45,1139,1144,1424,1978,
CK_87:920|8d049d30-e33d-4d35-970b-8908be6b01b5	845	0	845	TRINITY_DN1313_c1_g1_i1	2020	659	2013	840	5	+	4	588,145,9,103,	0,588,733,742,	659,1749,1896,1910,
CK_98:1293|c8dffd3f-7185-40a8-8d5f-7f061ffe16ba	1195	0	1190	TRINITY_DN4371_c3_g1_i1	1461	247	1441	1185	2	-	3	1101,16,70,	5,1109,1125,	247,1349,1371,
CK_91:775|6ac28003-d146-4bef-b837-389d50644532	688	0	688	TRINITY_DN26455_c0_g3_i1	1507	357	1047	682	1	+	5	160,12,337,124,50,	0,160,175,513,638,	357,518,534,873,997,
CK_102:494|b737d8a8-121d-4629-8963-e443433759d1	387	0	387	TRINITY_DN617_c0_g1_i3	4838	847	2052	387	0	+	2	112,275,	0,112,	847,1777,
CK_109:1786|1886179c-152d-4daa-908c-179d57941a52	1687	2	1683	TRINITY_DN40634_c0_g1_i1	3402	17	3146	1674	6	+	3	897,664,119,	2,899,1564,	17,2363,3027,
CK_69:1895|20e0343b-d936-4cdc-bcf0-50fd564b40ed	1844	0	1842	TRINITY_DN2897_c0_g1_i20	2288	71	2108	1829	13	-	6	1134,8,557,109,17,17,	2,1136,1144,1701,1810,1827,	71,1207,1404,1962,2073,2091,
CK_109:3453|e02adf14-efcb-4b07-b2f2-81e380492559	3402	4	3402	TRINITY_DN1288_c0_g1_i6	3750	276	3683	3377	18	+	11	120,19,13,10,26,108,2435,518,59,40,47,	4,125,145,158,168,194,302,2737,3255,3314,3355,	276,396,415,430,443,471,580,3016,3536,3596,3636,
CK_99:568|083c7632-3726-45ec-90ba-7655e93e4556	469	0	469	TRINITY_DN12481_c1_g1_i1	964	255	728	466	3	+	4	6,195,230,38,	0,6,201,431,	255,262,458,690,
CK_252:1409|50e61905-dd17-47b4-9c79-0f341339af2a	1160	0	1160	TRINITY_DN2634_c1_g1_i15	3508	24	1928	1154	3	-	5	6,27,235,174,715,	0,6,34,270,445,	24,466,493,728,1213,
CK_92:664|54624451-ed6f-44e7-979a-ce7ea5f02878	576	0	576	TRINITY_DN17389_c0_g1_i4	2470	1844	2421	573	3	+	2	555,21,	0,555,	1844,2400,
CK_516:1633|3745edf5-949c-45d1-9934-e041133792ec	1132	0	1132	TRINITY_DN669_c4_g1_i1	2856	806	2850	1129	3	+	2	1026,106,	0,1026,	806,2744,
CK_88:3569|33a238d2-8eca-4519-9f61-1a04fbc9895f	3512	0	3508	TRINITY_DN3591_c0_g1_i17	8539	296	4072	3496	12	+	3	203,55,3250,	0,203,258,	296,649,822,
CK_104:2228|84502aff-5b1f-4f04-bc07-50bdcd32e214	2153	2	2150	TRINITY_DN2543_c0_g1_i2	3064	18	3009	2146	2	+	5	98,426,689,732,203,	2,100,526,1215,1947,	18,336,796,2073,2806,
CK_103:309|04d2f3be-0190-47e0-84eb-798a297e53a4	215	0	215	TRINITY_DN2831_c0_g2_i2	2177	703	2153	214	1	-	2	177,38,	0,177,	703,2115,
CK_91:2711|d1e85d90-ea4a-4a63-8c57-3a0a7ef721f4	2624	0	2598	TRINITY_DN5449_c2_g1_i3	3047	283	2881	2598	0	+	1	2598,	0,	283,
CK_104:1166|e4f582af-ae74-421d-8f86-f3088455111e	1066	3	1063	TRINITY_DN702_c0_g1_i2	1309	73	1133	1059	1	+	1	1060,	3,	73,
CK_94:535|517816e3-498a-4c07-be27-5644d71bd781	444	0	444	TRINITY_DN9369_c0_g1_i1	1422	529	1370	443	1	+	2	400,44,	0,400,	529,1326,
CK_90:598|c69e708f-9f33-439f-9ee4-0195f24b0da8	508	0	508	TRINITY_DN301_c3_g1_i1	2217	1091	1961	504	4	-	2	322,186,	0,322,	1091,1775,
CK_102:349|ca8f5efd-938b-43d0-8aeb-c01d9f199d14	248	0	248	TRINITY_DN35301_c0_g1_i1	793	38	317	246	0	+	3	7,9,230,	0,7,18,	38,71,87,
CK_100:356|0cfbc2a7-2242-4327-8595-2aa321094d95	256	1	256	TRINITY_DN33942_c0_g1_i8	1000	540	795	254	1	+	1	255,	1,	540,
CK_98:1376|09c1990f-72b6-4a20-938e-021e38f51036	1290	2	1290	TRINITY_DN6197_c0_g1_i12	1771	57	1715	1283	4	-	5	6,399,16,247,619,	0,6,405,422,669,	57,196,733,848,1096,
CK_101:473|57af73f5-1f60-4fda-8db2-11e59a7ab0c6	374	0	372	TRINITY_DN1966_c1_g1_i1	731	54	668	371	0	+	3	107,14,250,	0,108,122,	54,164,418,
CK_110:598|4afde3a5-57c8-4c74-a53c-4030ea83638d	490	0	490	TRINITY_DN8295_c0_g1_i2	3339	2823	3333	486	1	+	3	452,8,27,	0,454,463,	2823,3276,3306,
CK_99:1563|92e5c5df-abc3-4d10-b9c2-56ac0ca3b41f	1470	0	1470	TRINITY_DN2930_c0_g1_i1	3263	1149	2880	1469	1	-	2	1315,155,	0,1315,	1149,2725,
CK_88:1686|5555a23a-2bf8-4589-967f-2f1d744f3bfd	1615	2	1615	TRINITY_DN18088_c0_g1_i3	3338	757	2372	1608	0	+	7	12,13,215,815,77,153,323,	2,14,27,242,1058,1136,1292,	757,770,784,1000,1815,1892,2049,
CK_98:356|6ce158a4-3097-4f9d-8ac4-213ae56972d2	264	0	264	TRINITY_DN14266_c0_g1_i4	1028	154	463	263	0	+	3	123,135,5,	0,124,259,	154,279,458,
CK_89:360|d169aa33-e7b6-450b-8f6d-31b35d1cdde2	271	0	270	TRINITY_DN130989_c0_g1_i1	477	70	341	270	0	-	2	97,173,	1,98,	70,168,
CK_99:1372|91f815ce-abff-4dc7-b140-9d1f94e4d522	1288	2	1288	TRINITY_DN4958_c0_g1_i4	2569	1009	2533	1283	3	-	2	78,1208,	0,78,	1009,1325,
CK_102:2445|58487ceb-1279-4fe2-aca1-9a229bb85cc7	2380	1	2375	TRINITY_DN15198_c0_g1_i5	2935	140	2886	2362	1	-	11	4,15,24,9,17,41,182,6,436,1614,15,	5,10,25,49,58,77,126,308,314,750,2364,	140,144,160,185,195,212,261,444,454,1256,2871,
CK_103:2509|6f813992-6546-48db-9866-1e75c2a181ec	2417	2	2417	TRINITY_DN892_c0_g2_i3	2748	1	2687	2394	15	+	3	1742,48,619,	2,1750,1798,	1,1841,2068,
CK_105:490|c708cf41-3d51-403d-af9d-ccf482e6bdf1	383	0	383	TRINITY_DN3230_c0_g1_i11	1796	119	641	383	0	-	2	247,136,	0,247,	119,505,
CK_104:1326|39524ee6-bcc3-4cb4-b63e-9059dad66229	1236	3	1236	TRINITY_DN8944_c0_g2_i7	1961	57	1290	1229	4	+	1	1233,	3,	57,
CK_106:2518|2f052d17-f288-4b6f-97df-26c26dc1526b	2439	3	2433	TRINITY_DN629_c0_g2_i1	2469	25	2459	2418	11	+	6	6,2271,13,30,19,90,	3,9,2281,2294,2324,2343,	25,32,2303,2317,2348,2369,
CK_93:510|5c65cd5c-fcf8-48ec-b48b-408f9d4bc494	417	0	417	TRINITY_DN22576_c1_g1_i1	2908	847	1266	414	3	+	3	163,109,145,	0,163,272,	847,1011,1121,
CK_104:487|60c79462-0ec7-4c61-a807-e0993344ec3d	381	0	381	TRINITY_DN4095_c0_g1_i3	2327	1850	2269	378	2	+	3	26,330,24,	0,26,357,	1850,1913,2245,
CK_87:420|43a25c17-f3c8-4489-8fee-86fbb30a55d6	340	0	340	TRINITY_DN1035_c1_g3_i1	912	327	693	337	1	-	5	17,9,7,147,158,	0,17,26,35,182,	327,363,373,380,535,
CK_107:1077|375237cd-2462-4fbc-82fd-f4daedb8c590	971	3	970	TRINITY_DN2992_c0_g2_i2	1322	136	1251	965	2	-	2	319,648,	1,320,	136,603,
CK_95:340|e08a8306-087c-45b3-888a-58275170296c	248	0	248	TRINITY_DN7727_c0_g1_i3	2453	2069	2422	247	1	+	2	242,6,	0,242,	2069,2416,
CK_92:1969|8ad47639-dd5e-4b69-8e85-c406649128a7	1888	9	1888	TRINITY_DN9005_c0_g1_i5	3598	48	3580	1870	6	+	8	18,12,5,167,595,939,135,5,	9,27,40,46,213,808,1748,1883,	48,67,79,84,314,2289,3230,3575,
CK_104:1823|7d9e8f7b-6187-420e-abbe-a2b922b4c2c8	1716	2	1716	TRINITY_DN20586_c0_g1_i16	2084	36	1914	1700	5	-	5	207,361,250,785,102,	0,209,570,820,1612,	36,243,691,1013,1812,
CK_105:390|11fe54c0-5366-4fb6-8543-4e8f556507f2	290	0	290	TRINITY_DN4640_c0_g1_i1	3762	158	458	288	2	+	3	268,15,7,	0,268,283,	158,427,451,
CK_98:1210|7ebaeb43-aa46-488c-810c-084f72a63804	1115	0	1114	TRINITY_DN13007_c0_g1_i3	1594	46	1359	1111	2	+	2	410,703,	0,411,	46,656,
CK_90:615|be900eae-adaf-49cc-860f-9e28dc53a6d9	532	1	532	TRINITY_DN27062_c0_g1_i1	2382	66	915	530	1	+	4	36,94,393,8,	1,37,131,524,	66,290,509,907,
CK_89:1919|433ddf65-c72b-41da-9bec-d17fe9832be5	1856	3	1856	TRINITY_DN14403_c0_g1_i15	4247	2076	4057	1853	0	-	6	8,116,887,825,12,5,	0,8,124,1011,1836,1848,	2076,2132,2251,3213,4039,4052,
CK_92:564|8055d5e3-4639-44a0-a8bd-e4f1f5c8f210	474	0	474	TRINITY_DN14446_c0_g1_i1	1722	425	908	471	2	-	7	44,109,34,14,124,57,91,	0,44,154,188,202,326,383,	425,471,582,617,632,759,817,
CK_95:930|80cb8cb7-1879-4152-a273-33da110049df	838	0	834	TRINITY_DN17623_c1_g2_i1	4975	1025	1864	832	2	-	4	65,182,4,583,	4,69,251,255,	1025,1092,1275,1281,
CK_96:1375|3bc3ef9a-813f-4a88-854e-6ff7c920e8a1	1335	3	1335	TRINITY_DN3166_c0_g1_i19	1810	162	1783	1324	8	+	4	915,224,180,13,	3,918,1142,1322,	162,1297,1549,1770,
CK_95:676|cdcf237b-3c11-4c11-8bd5-6ee719041286	580	0	580	TRINITY_DN1144_c0_g1_i11	2783	1807	2783	579	1	+	3	386,187,7,	0,386,573,	1807,2197,2776,
CK_93:1032|a94cc17b-de12-40de-9d61-abf5f2a33f58	949	0	948	TRINITY_DN118_c0_g1_i2	2519	83	2486	941	7	+	2	902,46,	0,902,	83,2440,
CK_94:1149|5fca8ef4-ea3b-4117-bb3e-edee7828e1ab	1074	0	1074	TRINITY_DN4589_c0_g1_i1	5094	4	1262	1074	0	+	3	141,495,438,	0,141,636,	4,235,824,
CK_103:333|70a450ce-7cff-4119-bf6a-4a5b86e8ad8a	230	0	230	TRINITY_DN17768_c5_g1_i1	569	57	298	228	1	-	2	32,197,	0,33,	57,101,
CK_91:623|2e4d6947-8657-4392-9e9e-2b7d171e71c1	540	0	540	TRINITY_DN26304_c0_g1_i1	2355	1756	2295	535	4	+	2	512,27,	0,513,	1756,2268,
CK_92:526|e122d36d-e9cb-4b9e-8691-bf60421c40dc	446	0	446	TRINITY_DN1421_c0_g3_i1	888	106	607	443	3	-	4	5,29,19,393,	0,5,34,53,	106,164,194,214,
CK_92:1117|aff51c78-2b3f-4fae-a8fb-6d4d1d422807	1035	0	1035	TRINITY_DN4095_c0_g1_i3	2327	1149	2270	1027	2	+	3	855,157,17,	0,855,1018,	1149,2096,2253,
CK_93:817|b16da5f3-504a-4f7f-a2d7-020e1e805ee7	725	0	721	TRINITY_DN3388_c0_g1_i1	911	43	898	718	2	+	3	703,9,8,	0,703,713,	43,879,890,
CK_92:981|64a66321-a140-4588-9445-8d9264fbc17f	887	0	882	TRINITY_DN6479_c0_g1_i1	1437	238	1323	882	0	+	2	198,684,	0,198,	238,639,
CK_110:2246|fb7c5b35-2f21-42ff-8e07-16cc3c61fd0c	2154	4	2143	TRINITY_DN12182_c3_g1_i2	2369	0	2142	2138	0	+	4	27,243,1826,42,	4,32,275,2101,	0,27,273,2100,
CK_91:602|f785d735-d28a-4d21-b88a-9844bc48a5bc	509	0	509	TRINITY_DN8761_c3_g1_i9	4899	1392	1900	505	3	+	2	472,36,	0,473,	1392,1864,
CK_87:923|e76df7d6-a41b-4db4-aed3-f4c38ac64a98	833	0	833	TRINITY_DN9205_c0_g1_i3	5320	3433	4269	826	1	-	9	6,159,216,52,43,137,68,38,108,	0,7,166,382,434,480,618,686,725,	3433,3442,3602,3819,3872,3915,4052,4123,4161,
CK_86:697|4f4c782f-980a-4024-987b-aacb3620d51e	617	1	616	TRINITY_DN2259_c0_g1_i16	1231	47	1041	615	0	-	4	382,48,60,125,	1,383,431,491,	47,559,712,916,
CK_101:1578|bfdec54b-f1b2-44bf-94cd-15f5d33fd791	1479	2	1475	TRINITY_DN6431_c0_g1_i1	1720	198	1673	1468	1	+	3	4,1409,56,	2,6,1419,	198,203,1617,
CK_97:542|be634b6b-5256-40b7-a690-16f8962e222a	439	2	439	TRINITY_DN696_c6_g1_i1	2840	99	537	437	0	-	2	22,415,	0,22,	99,122,
CK_102:1360|d5da62cc-4b53-43b6-9664-1742a912256b	1263	1	1263	TRINITY_DN1684_c1_g1_i1	2382	138	1398	1251	9	-	2	1001,259,	0,1003,	138,1139,
CK_90:564|65c60d8a-9bd1-4a6d-9e41-a8b7d90ffd0c	475	0	475	TRINITY_DN4742_c0_g1_i6	2939	956	1566	472	3	+	2	468,7,	0,468,	956,1559,
CK_97:2135|c2de4bce-592a-4500-a0ef-f459c872ada1	2060	7	2060	TRINITY_DN114844_c0_g1_i1	2229	3	2079	2049	4	+	3	5,1804,244,	7,12,1816,	3,11,1835,
CK_92:403|d1118319-d600-48b2-a116-7799f058936d	309	0	309	TRINITY_DN8911_c0_g1_i9	1369	994	1303	307	0	+	3	10,275,22,	0,12,287,	994,1005,1281,
CK_100:1049|21f57661-4e5d-4c2a-9485-e8b86c71b2bc	954	0	954	TRINITY_DN13464_c0_g3_i1	1772	84	1258	954	0	-	2	197,757,	0,197,	84,501,
CK_90:3520|f3364247-d4dd-48be-aa05-612e098d3f53	3428	1	3427	TRINITY_DN6413_c0_g1_i3	4038	444	3976	3409	0	-	4	1262,502,779,866,	1,1263,1782,2561,	444,1793,2295,3110,
CK_99:659|4277bde6-e0da-45ab-ab65-5e3908e5ced0	561	2	561	TRINITY_DN21594_c0_g2_i6	2093	1329	1893	556	3	-	3	34,139,386,	0,34,173,	1329,1364,1507,
CK_93:946|4f8d1c30-8a99-4568-8116-f5f0671a90dc	861	4	860	TRINITY_DN5588_c0_g1_i1	1347	119	1169	855	1	+	3	226,545,85,	4,230,775,	119,538,1084,
CK_90:2643|5aa6ad42-23fa-44db-a210-17bcb639e87f	2560	0	2560	TRINITY_DN5224_c0_g2_i2	3895	46	3733	2557	3	+	2	2071,489,	0,2071,	46,3244,
CK_104:395|cc74603c-e322-4033-a8dc-14417312f4b5	288	0	288	TRINITY_DN7529_c2_g2_i1	750	54	731	288	0	+	3	31,222,35,	0,31,253,	54,470,696,
CK_92:469|df1f1e6e-bb15-4d1f-836b-24d61a17b77a	383	0	383	TRINITY_DN3024_c3_g1_i1	4353	30	1275	383	0	-	3	7,369,7,	0,7,376,	30,448,1268,
CK_83:1072|5a117a64-f81a-46da-8649-6e3532508603	1009	4	1009	TRINITY_DN13387_c0_g1_i7	1490	151	1465	999	6	-	5	6,222,688,5,84,	0,6,228,916,921,	151,229,570,1375,1381,
CK_88:1971|d035b782-4d9f-4bbd-abb7-94055bd1c5c8	1891	0	1891	TRINITY_DN1322_c0_g1_i1	2101	28	2077	1888	0	+	5	24,23,1319,517,5,	0,26,50,1369,1886,	28,55,78,1506,2072,
CK_91:1002|91a09df5-e164-46b9-8860-f37d04fe9d9b	968	4	968	TRINITY_DN7652_c0_g1_i4	3991	251	1215	962	2	+	1	964,	4,	251,
CK_100:1805|d36c752d-b50a-4dda-802c-bfd1ed8a0f36	1698	2	1694	TRINITY_DN7427_c0_g1_i3	1817	103	1793	1688	0	+	4	1648,4,24,12,	2,1650,1658,1682,	103,1752,1756,1781,
CK_97:505|42d15de2-7c91-4797-86dc-0105304a36bc	422	0	418	TRINITY_DN9800_c0_g1_i3	5195	264	682	418	0	-	1	418,	4,	264,
CK_95:519|a23dab40-e7cd-41dc-9260-6f917cf4f2b8	427	0	424	TRINITY_DN4210_c0_g1_i1	932	28	452	424	0	-	1	424,	3,	28,
CK_87:1761|1ce2e0fb-bab6-4b28-849a-7b68d472e9d0	1710	0	1707	TRINITY_DN17645_c0_g2_i1	1963	144	1851	1698	9	-	1	1707,	3,	144,
CK_88:1337|e00dc89a-749e-4949-88e3-f09123b574df	1260	0	1260	TRINITY_DN14870_c0_g1_i1	1789	74	1337	1255	4	+	5	489,70,33,39,628,	0,489,559,592,632,	74,565,636,670,709,
CK_101:807|0552d9d2-4196-44ab-9857-e5691632a9de	714	3	714	TRINITY_DN5588_c0_g1_i1	1347	153	1169	710	1	+	3	529,97,85,	3,532,629,	153,986,1084,
CK_107:1118|f3f6680d-dce8-4b3b-a3e3-670e79bd4d1f	1011	0	1011	TRINITY_DN3141_c0_g1_i4	4708	1067	2177	1003	8	+	2	510,501,	0,510,	1067,1676,
CK_98:385|dcc4e469-57da-4fb6-8f7a-48ae4dc3d920	291	0	290	TRINITY_DN33682_c0_g1_i1	412	83	372	289	0	-	2	271,18,	1,273,	83,354,
CK_98:1589|f37b97e2-d247-4c47-9da9-e6f3a9875d73	1496	3	1495	TRINITY_DN5680_c0_g4_i1	1578	17	1509	1486	6	+	1	1492,	3,	17,
CK_87:1838|d5f3f995-0ab6-430a-ac37-d82f9ce2961b	1754	1	1751	TRINITY_DN10703_c0_g1_i1	2410	30	2218	1747	3	-	3	201,1267,282,	3,204,1471,	30,233,1936,
CK_105:860|643ca014-4bbf-4444-a389-d3a73450280e	753	0	753	TRINITY_DN11480_c0_g1_i1	1181	340	1096	746	1	-	5	165,29,21,66,466,	0,166,197,221,287,	340,505,535,563,630,
CK_93:1445|ab644f54-c109-4ab8-9873-afffdd25134b	1365	0	1365	TRINITY_DN14280_c0_g1_i1	2064	3	1923	1363	2	-	5	5,489,75,736,60,	0,5,494,569,1305,	3,11,578,1126,1863,
CK_103:894|e479a82d-5c50-4c8f-b668-f0251bb98081	781	2	781	TRINITY_DN3898_c0_g1_i1	1355	80	860	775	4	+	2	769,10,	2,771,	80,850,
CK_103:1758|d7f7d29c-917f-4311-9741-3af1c536ba46	1687	2	1687	TRINITY_DN7414_c2_g1_i3	2114	43	1976	1678	4	+	4	349,1134,18,181,	2,351,1485,1506,	43,637,1777,1795,
CK_88:451|1daf7571-e306-462a-a092-4f245bc3967f	361	0	361	TRINITY_DN5919_c0_g1_i3	1268	47	638	360	1	+	2	221,140,	0,221,	47,498,
CK_100:2470|17b5d47b-247d-42c8-81c2-596cbf963263	2379	0	2375	TRINITY_DN3624_c0_g1_i11	2656	10	2464	2369	6	-	2	1435,940,	4,1439,	10,1524,
CK_90:2092|d684e142-90b4-441c-bec8-8b106b3408f6	1995	0	1990	TRINITY_DN41617_c0_g1_i1	2243	66	2195	1984	6	-	2	667,1323,	5,672,	66,872,
CK_96:338|c56a8873-5a4b-4540-a4a0-217e0fe79fd2	237	0	237	TRINITY_DN12114_c0_g1_i1	1074	671	1027	236	1	+	4	162,8,62,5,	0,162,170,232,	671,838,849,1022,
CK_93:439|037a985e-9abe-47e8-9742-5ef6be827d85	350	0	350	TRINITY_DN22091_c0_g1_i2	2452	143	1506	348	2	-	2	287,63,	0,287,	143,1443,
CK_104:607|796fe006-3b70-4540-be68-cdade2c03a53	508	1	508	TRINITY_DN6207_c0_g3_i1	1253	111	1212	503	4	-	3	100,349,58,	0,100,449,	111,804,1154,
CK_98:8916|6dee79d2-221a-4bca-a65d-450fa769b78d	8904	0	8904	TRINITY_DN3968_c0_g1_i8	9029	124	9011	8835	33	+	7	918,5211,9,8,24,2199,499,	0,918,6130,6139,6153,6178,8405,	124,1053,6264,6274,6289,6313,8512,
CK_90:644|f2ab544d-206d-429e-b17b-0910a37f11ad	549	0	549	TRINITY_DN2564_c0_g2_i1	800	1	787	544	5	+	2	261,288,	0,261,	1,499,
CK_107:409|107e5363-3405-418c-b485-7b1388fcb9a1	302	0	302	TRINITY_DN9031_c0_g2_i1	935	83	386	301	0	-	4	15,41,156,89,	0,16,57,213,	83,98,140,297,
CK_103:927|7eface96-67f9-47e3-9c3b-ef5f66a0a20f	840	0	839	TRINITY_DN4484_c0_g1_i20	3869	1999	2889	834	3	-	2	26,811,	1,29,	1999,2078,
CK_91:924|a69df4e4-9b52-4806-95d6-acd87506dee6	853	0	853	TRINITY_DN7354_c0_g1_i2	4511	0	855	849	4	-	3	37,15,801,	0,37,52,	0,38,54,
CK_105:1982|1eb69c20-8097-4c8b-828f-82c8af742dc8	1890	2	1890	TRINITY_DN22342_c0_g1_i3	2382	20	2080	1883	4	-	3	44,61,1782,	0,45,106,	20,64,298,
CK_98:540|7dfab63f-6868-4565-86d1-9a9e84502401	442	0	442	TRINITY_DN2724_c2_g1_i7	779	57	606	439	2	+	4	221,183,29,8,	0,221,405,434,	57,310,539,598,
CK_92:401|aa44ab86-b528-4815-9b16-b69886b3d472	313	0	313	TRINITY_DN8405_c0_g2_i1	428	2	315	310	3	-	1	313,	0,	2,
CK_100:954|78eb292a-999d-4e39-8e9e-9d10600a5959	864	1	864	TRINITY_DN79061_c0_g1_i1	2215	115	1073	858	5	+	2	858,5,	1,859,	115,1068,
CK_97:861|799fd6bd-1df2-4262-a369-705b817a8a78	763	0	763	TRINITY_DN7226_c0_g1_i1	2644	133	899	758	5	-	2	329,434,	0,329,	133,465,
CK_98:484|0f26d2cd-24ac-4806-8978-c146bd930ddf	389	1	388	TRINITY_DN20562_c0_g1_i2	1029	146	533	386	1	-	1	387,	1,	146,
CK_89:603|816c36dd-ef72-4f65-ab71-5970ef3fe359	518	0	518	TRINITY_DN60634_c0_g1_i1	738	99	625	513	1	+	9	107,17,18,262,25,21,11,40,13,	0,107,125,143,406,432,453,464,505,	99,207,224,245,507,534,556,569,612,
CK_98:818|bb173783-0a8a-4a55-8607-d8908ae0bf09	714	0	714	TRINITY_DN823_c1_g1_i1	1507	682	1396	712	2	+	1	714,	0,	682,
CK_108:1012|0a0eba6c-a6e6-4b42-9b2b-9918f7d4de72	895	0	895	TRINITY_DN3628_c1_g1_i3	3357	2043	3140	887	5	+	4	601,274,9,8,	0,601,878,887,	2043,2839,3120,3132,
CK_101:310|18fd2271-f2ef-4c84-9b48-73205dcdbaed	220	0	220	TRINITY_DN5778_c0_g1_i3	1208	4	287	218	2	-	2	6,214,	0,6,	4,73,
CK_92:766|a270b0c8-8f37-4b68-b965-e6c4775f5763	670	0	669	TRINITY_DN44976_c0_g1_i9	4808	226	900	665	4	-	5	480,27,83,33,46,	1,481,508,591,624,	226,707,735,820,854,
CK_104:428|a382b4ad-04e2-4aa2-8b6c-37a2621877ab	322	0	322	TRINITY_DN495_c1_g1_i1	2432	1643	2307	322	0	+	3	232,83,7,	0,232,315,	1643,2127,2300,
CK_108:517|a2c3f5ff-282b-4cd8-82a3-ebe9b13d4c91	409	0	409	TRINITY_DN11786_c0_g2_i2	4453	3833	4250	407	1	+	5	47,112,61,9,179,	0,47,159,221,230,	3833,3881,3996,4057,4071,
CK_96:1982|c602da85-e5ad-40b5-922b-7b75a26c10f4	1902	3	1900	TRINITY_DN5073_c0_g1_i2	2011	82	1973	1889	2	+	2	1834,57,	3,1843,	82,1916,
CK_94:2984|a40d1ab1-5e45-43d4-bebe-b0c30a3dc76f	2911	0	2906	TRINITY_DN9689_c0_g1_i1	3304	15	3001	2884	5	-	6	357,256,33,661,1017,565,	5,362,629,665,1329,2346,	15,458,723,756,1417,2436,
CK_88:1818|31802783-bad7-44ae-80f4-961faeffc465	1734	0	1730	TRINITY_DN3168_c0_g1_i5	1904	117	1881	1718	8	-	2	135,1591,	4,143,	117,290,
CK_104:1345|66bea5d6-a8b2-4a09-844f-0c0eb3d62fcd	1244	2	1240	TRINITY_DN8692_c0_g1_i4	2231	401	2016	1237	1	-	3	921,83,234,	4,925,1008,	401,1645,1782,
CK_102:670|7a7fe572-4e2a-4922-b200-34f5aad0e892	571	0	571	TRINITY_DN9617_c0_g1_i4	2424	119	1270	570	0	-	4	100,245,44,181,	0,101,346,390,	119,219,556,1089,
CK_87:723|9c628945-2d1a-474b-aa59-89835f91a374	645	0	645	TRINITY_DN3554_c1_g1_i1	1044	314	1037	642	3	-	3	16,165,464,	0,16,181,	314,331,573,
CK_90:302|13ba7bd8-4d45-4e3e-af29-a08d9f4379e1	217	0	216	TRINITY_DN421_c0_g3_i1	1384	143	1116	215	1	-	2	31,185,	1,32,	143,931,
CK_114:2201|8ef0c319-1f0d-4671-80b8-d5d9e6483f23	2115	4	2107	TRINITY_DN14940_c0_g2_i2	2191	58	2169	2100	2	-	3	109,1970,23,	8,118,2088,	58,174,2146,
CK_87:1303|baf4fcb0-438b-4372-847d-76dbc450e1b5	1206	0	1205	TRINITY_DN5128_c1_g2_i1	2550	230	1976	1205	0	+	2	406,799,	0,406,	230,1177,
CK_102:2319|7804a9ac-9f80-41e9-a20e-505619b619ab	2217	3	2217	TRINITY_DN14649_c0_g1_i3	3269	7	3158	2211	3	-	2	117,2097,	0,117,	7,1061,
CK_86:552|e8d9f69c-431f-4576-8302-0c358ac20f4a	474	0	474	TRINITY_DN4827_c1_g2_i1	1126	25	503	470	2	-	4	14,4,274,180,	0,15,20,294,	25,41,45,323,
CK_93:1164|2df2920c-281b-4ba6-a0a5-a63f360e4efb	1077	0	1072	TRINITY_DN1315_c1_g1_i1	1623	182	1377	1068	2	-	4	147,8,211,704,	5,154,162,373,	182,330,348,673,
CK_107:342|09e0f9ed-d79b-47b8-986e-0dda628c5e3c	240	0	240	TRINITY_DN12692_c0_g1_i14	3210	260	900	238	1	-	3	7,61,171,	0,7,69,	260,668,729,
CK_91:1851|b7c1b593-359a-4b96-b344-652cd6b61249	1774	0	1774	TRINITY_DN3841_c0_g1_i2	2314	212	2205	1771	3	-	2	294,1480,	0,294,	212,725,
CK_108:2241|0a93b5c3-2fbb-40fa-8d5d-be0b52dc7587	2124	3	2114	TRINITY_DN5560_c0_g1_i1	2327	147	2327	2104	7	+	4	1077,914,82,38,	3,1080,1994,2076,	147,1277,2195,2289,
CK_113:571|1906a567-5189-4cca-be11-cc810187b8a2	477	0	477	TRINITY_DN10673_c0_g1_i1	1257	23	934	477	0	-	2	156,321,	0,156,	23,613,
CK_90:642|e1238676-6464-4b24-a545-dd05fd3004e5	557	0	557	TRINITY_DN5695_c0_g1_i3	1666	1048	1606	553	2	-	4	156,242,15,142,	0,156,400,415,	1048,1206,1448,1464,
CK_87:377|7e27f973-696a-4b16-86d5-518fe7312f5c	289	0	289	TRINITY_DN39914_c0_g3_i3	3047	102	397	287	2	+	6	130,18,5,9,104,23,	0,130,148,153,162,266,	102,233,253,259,269,374,
CK_96:2548|1e544c1b-82b7-44e1-8985-4b279a443502	2478	0	2478	TRINITY_DN2857_c2_g1_i3	5524	140	3176	2474	4	+	3	1335,1137,6,	0,1335,2472,	140,1982,3170,
CK_89:2478|aa58bdd8-7121-4cae-ad61-19f34e4a52b5	2427	0	2407	TRINITY_DN9187_c0_g1_i1	3018	77	2824	2404	3	+	2	397,2010,	0,397,	77,814,
CK_90:1740|e2964a93-ae9f-41d5-9395-c9fbfb2b7e25	1671	0	1667	TRINITY_DN2570_c0_g1_i11	2643	947	2614	1656	9	-	5	1336,279,22,22,6,	4,1341,1620,1643,1665,	947,2283,2563,2585,2608,
CK_103:1422|0618a407-d38d-415a-bc51-fa6c7fcea551	1318	2	1318	TRINITY_DN7659_c0_g1_i1	2233	86	2194	1310	5	-	6	72,5,6,210,179,843,	0,73,78,84,294,473,	86,158,165,173,384,1351,
CK_103:500|be7499af-7ec8-41d3-a2ad-8d86d0b8d1fb	396	0	396	TRINITY_DN9316_c0_g1_i15	2719	1374	1770	394	1	-	3	4,370,21,	0,4,375,	1374,1379,1749,
CK_87:1166|838a5774-0b08-45fa-b909-39e60107fbd7	1086	1	1080	TRINITY_DN8373_c0_g1_i7	2445	1282	2445	1077	2	+	4	296,758,6,19,	1,297,1055,1061,	1282,1655,2414,2426,
CK_90:419|44ff078f-b9ab-479c-9033-5dd5d910ad2f	331	0	330	TRINITY_DN289_c0_g1_i6	3170	123	458	328	0	-	3	54,8,266,	1,57,65,	123,181,192,
CK_86:1063|746f0927-3cb9-4f28-9fbb-b36714ab0733	989	0	989	TRINITY_DN2420_c0_g1_i2	1143	58	1050	980	8	+	3	814,42,132,	0,814,857,	58,876,918,
CK_88:718|9fe090cf-1754-4116-946a-42894f39e79d	628	0	624	TRINITY_DN10258_c2_g1_i2	1355	536	1188	623	0	-	2	103,520,	4,108,	536,668,
CK_103:589|4222af48-09d0-4a8a-a799-46a906f7a434	487	0	486	TRINITY_DN1016_c2_g1_i4	4822	3169	3782	483	3	-	2	199,287,	1,200,	3169,3495,
CK_90:577|d72c776d-9fb2-4803-b891-a1a78a43fbe6	482	0	479	TRINITY_DN11854_c1_g1_i2	1391	76	591	478	1	+	3	16,3,460,	0,16,19,	76,126,131,
CK_91:937|9474d4ff-9eff-429a-a2d1-8cd9935323c5	853	0	852	TRINITY_DN5144_c1_g1_i2	1854	202	1768	851	1	-	2	688,164,	1,689,	202,1604,
CK_100:985|553b9b56-28c0-4d4f-9662-4f73492cec4a	896	3	896	TRINITY_DN7398_c0_g1_i1	2295	111	1127	888	3	+	4	505,253,99,34,	3,508,762,862,	111,741,994,1093,
CK_88:877|601675c7-4363-4e60-8470-7e2379325993	787	1	786	TRINITY_DN303_c0_g1_i4	4297	102	884	780	2	+	2	306,476,	1,310,	102,408,
CK_94:1626|a0c4c070-2645-44f7-8151-1c5cd146471a	1542	0	1532	TRINITY_DN4296_c3_g1_i4	1830	24	1677	1527	2	-	7	6,6,301,47,485,502,182,	10,16,22,324,373,858,1360,	24,31,38,339,387,889,1495,
CK_95:1174|1ae55083-9d18-4c73-be68-bc54a09417da	1081	3	1078	TRINITY_DN14280_c0_g1_i1	2064	25	1947	1075	0	-	2	273,802,	3,276,	25,1145,
CK_94:1713|df3583c8-59d0-4994-866d-2029f9e39e78	1663	2	1663	TRINITY_DN2150_c30_g1_i1	2512	338	2155	1659	2	-	5	417,1177,7,8,52,	0,417,1594,1601,1609,	338,756,1934,1943,2103,
CK_91:872|eca6a9fc-a401-40fe-8374-5be179d0a615	793	0	788	TRINITY_DN6281_c0_g1_i5	1168	36	927	786	1	+	3	399,355,33,	0,399,755,	36,539,894,
CK_88:2262|d07b6f69-70a4-475b-bb03-8777e81c4467	2198	0	2193	TRINITY_DN8101_c1_g2_i2	2406	33	2303	2189	4	+	3	464,574,1155,	0,464,1038,	33,502,1148,
CK_87:385|d589b340-39bc-41a2-96b7-b98157653d59	296	0	296	TRINITY_DN12425_c0_g1_i1	1468	1101	1464	295	0	+	3	251,39,5,	0,252,291,	1101,1355,1459,
CK_92:1375|8386c419-8502-4deb-b63e-5b2c43e8ccc4	1313	4	1307	TRINITY_DN29393_c0_g1_i3	1793	32	1692	1303	0	-	2	835,468,	6,841,	32,1224,
CK_91:589|d58bfe2c-5455-4e4d-9391-a45f2b88e94f	508	0	507	TRINITY_DN17152_c0_g1_i1	764	171	711	507	0	-	2	145,362,	1,146,	171,349,
CK_103:1264|375c1eb5-39ee-42ce-8867-bb9a7ddfa98b	1159	1	1151	TRINITY_DN14369_c0_g1_i5	1234	40	1190	1149	1	+	1	1150,	1,	40,
CK_101:3866|f3b29524-fe1b-48e4-a413-05f8e44ab2df	3792	5	3789	TRINITY_DN4198_c0_g1_i2	3938	97	3938	3769	4	-	7	93,1878,331,22,579,735,135,	3,101,1980,2315,2337,2917,3652,	97,193,2071,2405,2428,3009,3803,
CK_94:324|8a9ae7a3-858e-43c5-ba48-0a2db68827d0	231	0	231	TRINITY_DN1863_c0_g1_i14	3232	1	259	230	1	-	4	21,158,13,39,	0,21,179,192,	1,42,206,220,
CK_101:1167|e1b1f343-e296-4462-a688-a315974b0a71	1068	2	1068	TRINITY_DN3983_c0_g1_i1	1534	174	1461	1060	4	-	3	109,390,565,	0,111,501,	174,286,896,
CK_89:1023|8e7a0751-d6e7-41ef-852c-0b7f6343c958	940	0	939	TRINITY_DN8434_c0_g1_i7	1307	75	1026	934	5	+	2	207,732,	0,207,	75,294,
CK_96:492|a9d517d5-ec38-4a43-ab5e-0a3c928c1147	421	0	421	TRINITY_DN3732_c0_g1_i26	2416	1121	1813	417	4	-	2	6,415,	0,6,	1121,1398,
CK_97:2541|7e3bb8bc-984a-4c34-8a8d-81ed74790bcb	2458	3	2458	TRINITY_DN3120_c0_g1_i2	2640	151	2606	2450	5	+	1	2455,	3,	151,
CK_100:1493|39884791-6d58-49e7-bde5-785ce9e6f895	1386	3	1383	TRINITY_DN2900_c0_g1_i4	1787	103	1767	1379	1	+	2	894,486,	3,897,	103,1281,
CK_87:790|e180534e-5694-4836-842b-dceca78d9e38	706	0	706	TRINITY_DN2150_c5_g1_i1	1917	477	1517	700	6	+	3	38,655,13,	0,38,693,	477,516,1504,
CK_101:1417|0c8acc7f-b306-4561-ac1e-c06807456e76	1343	0	1342	TRINITY_DN3707_c0_g2_i8	2241	152	1569	1335	7	-	3	73,865,404,	1,74,939,	152,227,1165,
CK_97:1804|13e65c1a-81f2-4942-9a3b-093ec7d72765	1704	0	1701	TRINITY_DN5027_c2_g1_i49	3600	233	3066	1688	0	-	8	51,6,48,375,117,376,551,164,	3,54,67,115,490,607,989,1540,	233,285,292,344,750,1351,1727,2902,
CK_105:1052|e030b518-b2e7-4c55-a63c-99c00bce1cbb	956	1	956	TRINITY_DN10138_c0_g1_i8	2391	9	1169	954	1	-	2	573,382,	0,573,	9,787,
CK_101:2276|92832dce-a529-4c4e-8012-777feef9d5b5	2182	8	2181	TRINITY_DN12132_c0_g1_i8	4143	1514	3778	2167	5	-	3	215,1874,83,	1,216,2091,	1514,1821,3695,
CK_99:878|cdf1e69f-0fd2-4c64-b543-6920b97cc42f	776	0	776	TRINITY_DN3388_c0_g1_i1	911	47	911	774	2	+	2	464,312,	0,464,	47,599,
CK_89:492|fff0d6eb-d04e-4dca-8e26-fb31a8e9eddd	404	0	404	TRINITY_DN5120_c2_g1_i2	2700	781	1301	404	0	+	2	303,101,	0,303,	781,1200,
CK_88:8006|8416a423-ec99-4158-9d78-7aff2ee3e44c	7968	0	7933	TRINITY_DN26137_c0_g1_i2	10203	129	8057	7908	13	+	10	35,67,119,11,1517,113,1358,4572,109,20,	0,35,102,224,236,1755,1869,3229,7802,7913,	129,166,234,353,364,1881,1994,3355,7927,8037,
CK_102:769|485eff8d-9688-47d5-98b0-f88dba59ba52	666	2	666	TRINITY_DN14669_c1_g1_i8	6261	5550	6214	660	0	+	6	21,589,11,4,22,13,	2,23,613,625,629,653,	5550,5572,6161,6172,6179,6201,
CK_59:446|a3720da4-d96b-4766-879b-f350a2c2d541	399	0	399	TRINITY_DN2884_c2_g3_i2	2396	1106	1655	399	0	+	3	233,161,5,	0,233,394,	1106,1460,1650,
CK_99:1004|e9de04f6-ed67-4ebd-b71d-f466326d7bc9	895	3	892	TRINITY_DN6946_c0_g1_i6	3198	179	3074	889	0	+	3	63,786,40,	3,66,852,	179,250,3034,
CK_94:1375|d914b9bc-2d6c-4a7f-9378-f67f538a932b	1291	0	1286	TRINITY_DN21594_c0_g2_i6	2093	229	2047	1279	5	-	6	7,46,729,410,31,61,	5,14,60,789,1199,1230,	229,236,285,1543,1954,1986,
CK_105:458|c204f146-43eb-4855-8af2-be9fd9ce4721	355	0	355	TRINITY_DN64071_c0_g1_i1	987	286	641	354	1	+	1	355,	0,	286,
CK_105:2821|9e902add-7db7-47db-9d71-ecb212e4cfbe	2752	3	2747	TRINITY_DN3527_c0_g1_i2	3031	199	2946	2743	1	+	2	2732,12,	3,2735,	199,2934,
CK_94:582|375299e7-4d8d-42a6-82ea-30948375d007	488	0	488	TRINITY_DN47138_c0_g2_i1	910	106	597	484	0	-	10	88,115,52,31,9,64,46,10,30,39,	0,88,203,255,286,295,359,406,417,449,	106,195,311,364,396,407,472,518,528,558,
CK_102:2448|296eaacf-c1ee-43a5-9e07-dcbe3f60efb3	2358	3	2352	TRINITY_DN813_c1_g1_i2	2489	0	2425	2341	8	-	2	23,2326,	6,29,	0,99,
CK_103:3067|e8b9676a-ff32-400a-bf94-8a4eddc0a618	3027	2	3026	TRINITY_DN8078_c0_g1_i1	3424	126	3315	3007	2	+	10	2163,510,164,86,16,14,21,8,9,18,	2,2165,2675,2839,2926,2946,2961,2982,2994,3008,	126,2426,2937,3104,3198,3222,3244,3267,3281,3297,
CK_97:4571|1553f948-d5b9-4b81-9554-062446e83bd7	4556	2	4553	TRINITY_DN3997_c0_g1_i2	4803	117	4669	4539	5	+	7	251,3673,138,21,12,442,7,	2,254,3927,4067,4088,4102,4546,	117,368,4045,4184,4208,4220,4662,
CK_112:819|253f5633-58ba-4007-9e6d-0a12782d69a2	718	2	718	TRINITY_DN8329_c0_g2_i2	2110	100	1246	712	3	+	6	9,5,101,533,61,6,	2,12,17,118,651,712,	100,109,115,278,814,1240,
CK_92:2319|c304c82b-e671-48fa-988e-bac00c6a4152	2230	0	2219	TRINITY_DN26448_c0_g1_i1	2824	53	2791	2217	2	+	2	405,1814,	0,405,	53,977,
CK_89:324|34e15f4d-f1d7-4429-9ffb-44ac6bf94309	240	0	240	TRINITY_DN859_c2_g1_i1	5247	2203	2626	240	0	+	2	60,180,	0,60,	2203,2446,
CK_104:1077|3a0b44be-5da9-4d68-b4a4-e4f01d8edae3	986	2	985	TRINITY_DN26333_c0_g1_i2	4213	83	1355	982	1	-	2	304,679,	1,305,	83,676,
CK_86:646|a3234360-1777-4e4d-aabb-98c6d5829c48	563	0	563	TRINITY_DN10215_c0_g1_i8	5482	3268	3833	560	1	+	4	65,349,55,92,	0,66,415,471,	3268,3336,3686,3741,
CK_93:817|1004f5a9-67e4-465c-98ab-334695060818	737	0	737	TRINITY_DN25084_c0_g1_i2	1258	136	986	731	6	+	2	732,5,	0,732,	136,981,
CK_103:2165|5100580a-8bd8-410a-a85f-63f89bb36cff	2100	0	2096	TRINITY_DN7873_c0_g1_i7	2393	85	2239	2080	5	+	9	469,1163,221,28,75,4,32,82,11,	0,469,1635,1856,1886,1962,1966,2003,2085,	85,608,1771,1996,2024,2101,2106,2145,2228,
CK_97:1145|8f14c307-96d7-4e44-bb7e-a3947d796339	1059	0	1058	TRINITY_DN14580_c1_g1_i4	1290	53	1220	1053	5	+	3	26,407,625,	0,26,433,	53,101,595,
CK_102:430|f5fec236-b17f-462c-8db2-4deb1998f577	330	0	330	TRINITY_DN3_c2_g1_i2	1620	402	1109	327	3	-	2	6,324,	0,6,	402,785,
CK_111:962|10959f1d-9a43-4fdc-9c9c-2a00255ecdb7	853	1	853	TRINITY_DN10636_c0_g1_i1	1917	360	1223	847	4	-	8	106,206,40,42,25,67,126,239,	0,107,313,353,395,420,487,613,	360,466,674,715,758,784,855,984,
CK_96:508|121c9bbc-e155-45bf-8a94-533157bf2742	421	0	421	TRINITY_DN2_c0_g1_i3	5518	4376	5003	418	1	+	3	270,142,7,	0,272,414,	4376,4646,4996,
CK_107:736|540a5afd-87cc-47de-9423-c9fce6e1fbdc	640	0	640	TRINITY_DN239_c0_g1_i3	1782	1040	1718	635	5	+	3	69,566,5,	0,69,635,	1040,1129,1713,
CK_101:4347|5edb3566-8142-4539-8aca-e22752d4337d	4381	4	4381	TRINITY_DN42912_c0_g1_i2	4768	75	4719	4373	4	+	2	2695,1682,	4,2699,	75,3037,
CK_95:1731|0573571f-2790-4375-8096-33a81e7abe3f	1639	1	1639	TRINITY_DN3187_c0_g1_i7	3454	910	3429	1633	5	-	2	837,801,	0,837,	910,2628,
CK_102:750|7a53f298-ca91-4246-8cfc-9b06b51f0145	661	0	661	TRINITY_DN2870_c1_g2_i2	806	25	707	656	5	-	2	6,655,	0,6,	25,52,
CK_89:546|53389dc6-b500-4de3-b7f8-6788843b83b0	455	0	455	TRINITY_DN599_c5_g1_i1	1289	67	590	454	1	-	2	108,347,	0,108,	67,243,
CK_101:527|60367c08-9e60-4a43-a3f4-2743d5cbcc8b	430	0	430	TRINITY_DN3080_c7_g1_i1	973	334	763	429	0	+	2	217,212,	0,218,	334,551,
CK_94:1119|937b8bf5-baf9-47b0-a59c-b2e101a6a12c	1026	0	1026	TRINITY_DN18850_c1_g1_i1	2034	149	1185	1019	5	-	10	14,4,6,14,565,105,4,272,21,19,	0,14,18,24,38,603,709,713,985,1007,	149,164,170,178,194,760,865,870,1145,1166,
CK_107:412|b9ff71c6-a1b4-4edd-aa00-991a621cf893	308	0	307	TRINITY_DN7463_c1_g1_i1	2599	1245	2509	307	0	+	3	86,66,155,	0,86,152,	1245,2287,2354,
CK_83:783|c9034505-771e-44de-bf44-2d4f9333610e	705	2	705	TRINITY_DN81270_c0_g1_i1	2351	461	1185	703	0	-	2	645,58,	0,645,	461,1127,
CK_107:1464|db3ecb39-c4ee-4caf-beb8-696be8f64821	1395	1	1395	TRINITY_DN2757_c0_g1_i1	1721	0	1643	1386	3	-	6	15,1223,17,28,30,76,	0,15,1239,1260,1288,1318,	0,246,1471,1489,1527,1567,
CK_97:370|919326af-e80e-4022-ad92-feedfeaf0664	273	0	273	TRINITY_DN1085_c0_g1_i20	3232	2542	2885	272	0	+	4	241,9,17,5,	0,241,251,268,	2542,2787,2796,2880,
CK_96:3238|80b5c73a-bb9d-4892-8443-cdc8403e3ca7	3161	1	3161	TRINITY_DN491_c0_g1_i1	3341	40	3340	3142	13	+	7	232,48,563,9,5,2270,28,	1,233,282,848,858,863,3133,	40,393,441,1011,1022,1028,3312,
CK_97:757|b1bd8afc-0161-485d-bc5f-d82e6934d9a7	664	0	664	TRINITY_DN287_c6_g1_i8	2694	1872	2542	660	2	-	9	50,9,23,29,15,74,23,293,146,	0,50,59,83,112,127,201,224,518,	1872,1923,1933,1956,1986,2004,2079,2103,2396,
CK_87:4357|5baedc78-5767-47c0-aac7-116e51aad2b1	4288	0	4286	TRINITY_DN7766_c0_g1_i2	5067	5	4977	4280	4	+	5	270,845,810,2227,132,	0,270,1115,1925,4154,	5,419,1465,2617,4845,
CK_86:1696|751905f3-b144-4198-818a-98ba0ee65107	1626	1	1622	TRINITY_DN3165_c0_g1_i5	2563	77	2454	1611	7	-	5	205,219,10,628,556,	4,209,428,439,1069,	77,430,1260,1270,1898,
CK_91:781|37fd00c3-0985-4b75-8fa0-8c51f8f849fa	679	1	676	TRINITY_DN4732_c0_g1_i2	3666	1944	3452	674	1	-	3	93,250,332,	3,96,346,	1944,2756,3120,
CK_91:655|a31b501f-d01b-4091-825c-f9348e38f129	564	0	564	TRINITY_DN120016_c0_g1_i1	752	17	589	559	3	+	7	39,210,52,22,124,17,98,	0,39,249,302,324,449,466,	17,57,269,321,346,472,491,
CK_99:2424|37c4fc87-c448-4c2d-8b9c-1c810274b0b9	2352	2	2351	TRINITY_DN5074_c0_g1_i6	2678	119	2470	2330	8	-	6	195,1402,5,523,14,199,	1,196,1603,1609,2132,2151,	119,317,1725,1732,2256,2271,
CK_86:356|948f5cba-6348-423e-ac1e-6096a93b7984	269	0	269	TRINITY_DN23123_c0_g1_i1	483	81	349	267	1	+	2	224,44,	0,225,	81,305,
CK_94:922|0bc8b99c-1393-4e4d-bfa1-bbd66c6c9eaf	837	0	837	TRINITY_DN1984_c0_g1_i7	2545	669	2505	834	3	+	2	453,384,	0,453,	669,2121,
CK_105:733|a42e20b8-dee5-42d0-87a2-e5de29f0fb6e	631	1	631	TRINITY_DN676_c0_g3_i1	774	6	710	629	1	-	3	499,7,124,	0,499,506,	6,576,586,
CK_91:1428|da2f92fe-e429-407f-b5aa-17e365bfc00b	1356	0	1351	TRINITY_DN10735_c0_g1_i4	2151	37	1735	1343	8	+	3	120,1113,118,	0,120,1233,	37,432,1617,
CK_100:539|e8b21f49-685a-42ce-aff6-622e601a4785	441	0	441	TRINITY_DN1389_c0_g2_i2	1712	937	1526	440	1	+	2	348,93,	0,348,	937,1433,
CK_109:1664|55bb9b52-10c1-42a9-8182-8140160f2f7c	1549	2	1549	TRINITY_DN6090_c0_g1_i11	4575	64	1662	1535	3	+	10	479,93,598,55,113,47,85,22,40,6,	2,481,574,1179,1235,1349,1396,1481,1503,1543,	64,544,638,1271,1326,1439,1487,1575,1598,1656,
CK_98:334|ab927b58-5b7e-4b0e-8155-64c13c3befbc	239	0	239	TRINITY_DN3422_c0_g2_i1	1583	583	1308	239	0	+	2	6,233,	0,6,	583,1075,
CK_101:410|1025e5f9-6b73-4b41-b379-cb2753836f96	310	0	310	TRINITY_DN9796_c0_g1_i4	2999	510	1048	310	0	+	2	294,16,	0,294,	510,1032,
CK_112:367|0a7f7b66-7602-4e22-a270-0008463b1161	257	2	257	TRINITY_DN1898_c0_g1_i2	3225	2926	3181	255	0	+	1	255,	2,	2926,
CK_100:326|5d8547e0-d29d-447f-8594-930b702c2e0b	232	0	230	TRINITY_DN6088_c1_g1_i2	2009	1566	1917	230	0	+	2	7,223,	0,7,	1566,1694,
CK_90:1178|14c8c661-9e52-4379-ba9b-a5bea4384655	1106	0	1106	TRINITY_DN32_c1_g1_i1	3664	234	2336	1105	1	-	2	1026,80,	0,1026,	234,2256,
CK_98:1537|3b7fec20-f660-451f-ab50-ecf20241d97b	1453	1	1452	TRINITY_DN3017_c1_g1_i2	4467	52	3042	1451	0	-	2	119,1332,	1,120,	52,1710,
CK_95:675|e9885e84-efe7-47f8-9e93-4eaed4d82834	586	3	586	TRINITY_DN54673_c0_g1_i3	2525	1899	2481	581	1	-	2	570,12,	0,571,	1899,2469,
CK_87:1616|762415e8-ec90-4aa7-b5ef-6b58fe10b521	1523	1	1518	TRINITY_DN6284_c0_g2_i4	2442	813	2331	1515	2	-	2	4,1513,	5,9,	813,818,
CK_93:433|9c8b04c6-a25d-4953-9ee5-e424ea20617d	341	1	341	TRINITY_DN2238_c0_g1_i42	2153	1707	2139	338	2	+	2	329,11,	1,330,	1707,2128,
CK_100:1970|9ed41cbf-3544-414d-b716-4f36a805715a	1885	2	1882	TRINITY_DN7422_c0_g1_i1	2505	12	1894	1879	0	-	2	74,1805,	3,78,	12,89,
CK_91:393|468ac977-dbe3-48be-a8ff-13479c8fbe13	302	0	302	TRINITY_DN81321_c0_g2_i1	1114	330	631	300	1	+	2	220,81,	0,221,	330,550,
CK_102:773|95dac157-14d2-47fb-904f-391164621514	676	0	676	TRINITY_DN45771_c0_g1_i2	4642	1700	2379	671	5	+	4	588,3,77,8,	0,588,591,668,	1700,2289,2293,2371,
CK_102:1564|1d069b02-6206-47d3-90b3-fcbb1e817cd7	1481	2	1481	TRINITY_DN664_c0_g1_i6	3291	617	3171	1470	9	-	3	225,610,644,	0,225,835,	617,843,2527,
CK_108:722|5bc74689-8f02-4f88-8177-59e91da86b91	624	0	624	TRINITY_DN8079_c0_g1_i33	2271	21	644	622	1	-	2	38,585,	0,39,	21,59,
CK_97:424|c56b8ea0-2b24-4026-a73f-baed7153336a	327	0	327	TRINITY_DN35378_c0_g3_i2	914	62	389	325	1	-	3	235,30,61,	0,235,266,	62,298,328,
CK_105:1622|c2eba399-fbea-45d9-b411-88f2cf670df0	1537	2	1537	TRINITY_DN4290_c0_g1_i1	1764	12	1555	1533	1	-	5	38,74,17,62,1343,	0,38,113,130,192,	12,51,131,149,212,
CK_108:769|c48c8407-c02b-4650-a1cc-abb89083944a	677	2	674	TRINITY_DN7136_c0_g1_i1	4407	3626	4298	672	0	-	1	672,	3,	3626,
CK_107:1525|89f19555-8307-4fda-bb17-00d9b5a1b3ba	1426	1	1426	TRINITY_DN1974_c0_g1_i5	6648	718	3322	1422	3	+	3	1249,171,5,	1,1250,1421,	718,3086,3317,
CK_107:2685|ef62f732-5d1c-46bc-9315-b9bf4037aae4	2615	3	2612	TRINITY_DN1435_c0_g1_i17	5245	119	5181	2598	5	+	5	140,669,1395,13,386,	3,143,812,2210,2226,	119,504,3382,4782,4795,
CK_100:1547|d982ab30-5712-4ba2-a60f-a834de4ba745	1472	6	1469	TRINITY_DN4079_c0_g1_i4	2542	955	2542	1461	0	-	4	1060,347,30,24,	3,1063,1410,1442,	955,2136,2487,2518,
CK_92:671|a0b1923e-e698-4383-a604-92696e921df2	584	0	583	TRINITY_DN1414_c0_g1_i3	2530	684	2294	583	0	+	2	34,549,	0,34,	684,1745,
CK_92:3328|6f75a538-9627-4819-b68c-c8d141312411	3242	1	3242	TRINITY_DN1375_c1_g1_i1	4495	68	4462	3212	22	+	7	19,149,2948,97,9,6,6,	1,20,169,3117,3214,3225,3236,	68,88,276,4340,4440,4450,4456,
CK_86:2401|c848c2de-c54d-489c-8b14-aa9ea2afc05e	2341	3	2341	TRINITY_DN12309_c0_g1_i2	2355	9	2347	2329	9	+	1	2338,	3,	9,
CK_89:1909|4ce95bcc-a6b0-498d-9805-a5d5eb3ea641	1835	0	1831	TRINITY_DN3180_c0_g1_i4	2993	26	2912	1831	0	-	2	662,1169,	4,666,	26,1743,
CK_86:3713|20c81f6a-f31e-412f-9c36-f5972b4d256d	3698	0	3697	TRINITY_DN11259_c1_g2_i1	4350	108	3823	3670	9	+	18	581,17,459,10,9,6,50,14,23,4,22,44,23,1176,781,31,7,422,	0,585,602,1063,1073,1082,1091,1141,1157,1180,1184,1207,1252,1276,2455,3236,3268,3275,	108,690,710,1170,1181,1191,1204,1255,1272,1300,1306,1333,1377,1400,2577,3359,3390,3401,
CK_94:586|b020cd9e-e6a5-4181-ae7d-fb5f105e1b40	496	0	496	TRINITY_DN2564_c0_g2_i1	800	238	787	492	3	+	3	144,325,26,	0,145,470,	238,435,761,
CK_112:335|17f6c7c5-aa24-4547-99e0-ae44967a50c5	227	0	226	TRINITY_DN5120_c2_g2_i6	3913	156	423	226	0	+	2	5,221,	0,5,	156,202,
CK_53:829|15c0d55a-f109-405d-b111-7ec74108ee0c	781	2	781	TRINITY_DN5586_c0_g1_i6	961	182	961	776	3	-	1	779,	0,	182,
CK_103:659|875cc061-939e-4c03-b1cd-7c5b17dbb188	563	0	563	TRINITY_DN3368_c0_g1_i8	2440	24	1356	561	2	-	4	303,147,62,51,	0,303,450,512,	24,390,662,1305,
CK_96:2762|7c36b4b9-0b0e-4f95-952b-611f5a7b9343	2680	0	2679	TRINITY_DN176_c3_g2_i3	3589	662	3427	2664	12	+	5	150,567,1637,286,36,	0,150,718,2357,2643,	662,899,1466,3103,3391,
CK_90:521|a7187e5a-d3e9-49da-8388-248147eb902b	431	0	431	TRINITY_DN22936_c0_g1_i4	1849	43	576	429	1	+	5	231,29,4,158,8,	0,231,260,265,423,	43,275,305,309,568,
CK_98:2193|d2c7158a-a619-4e66-8bd2-447104cf9e25	2099	0	2095	TRINITY_DN10254_c0_g1_i2	3575	1158	3437	2092	0	-	3	1756,104,232,	4,1760,1867,	1158,3101,3205,
CK_85:1888|13af4411-0999-42f0-9c9f-460b85ada5d7	1821	0	1813	TRINITY_DN5750_c0_g1_i2	4068	371	3984	1805	6	+	2	85,1726,	0,87,	371,2258,
CK_96:1047|949c3913-b1d9-4f8e-87f6-ab31ae843347	965	0	961	TRINITY_DN4609_c0_g1_i7	3286	2284	3255	958	3	+	7	731,13,67,36,22,75,17,	0,731,744,811,847,869,944,	2284,3018,3033,3101,3139,3162,3238,
CK_110:892|bf12797e-be6a-402b-ad9f-60100bf4e75a	787	0	785	TRINITY_DN3285_c1_g1_i3	3612	996	2332	783	2	+	2	142,643,	0,142,	996,1689,
CK_85:1137|6dc232c0-42d5-4a5a-84eb-0276db1b864a	1053	5	1053	TRINITY_DN3610_c0_g1_i1	2310	775	2284	1048	0	+	2	283,765,	5,288,	775,1519,
CK_103:1783|0bb94b48-50f4-4ce9-9c6f-4159b00fd050	1689	3	1689	TRINITY_DN1684_c1_g1_i1	2382	173	2241	1673	13	-	2	1593,93,	0,1593,	173,2148,
CK_103:532|e32e13d5-1414-431a-b1ab-178bda44880a	427	0	427	TRINITY_DN25663_c0_g1_i1	639	159	589	425	2	-	3	289,126,12,	0,289,415,	159,449,577,
CK_95:654|ffc5d43b-599e-42c0-b54c-75def6227b8e	563	3	563	TRINITY_DN13447_c0_g1_i1	615	33	592	559	0	+	2	27,532,	3,31,	33,60,
CK_90:2789|1bc34009-d784-429b-8ee5-cba7a407dada	2773	0	2771	TRINITY_DN5246_c0_g1_i1	2929	162	2929	2758	3	+	4	1850,13,64,834,	0,1858,1871,1937,	162,2017,2031,2095,
CK_113:1522|9305c20b-1f2c-460c-87b0-6d50995a150f	1397	3	1397	TRINITY_DN6435_c0_g1_i2	2122	43	2013	1388	6	-	2	493,901,	0,493,	43,1112,
CK_106:473|25b77007-dc0d-4f9c-93f8-7d60e1bfb059	364	0	364	TRINITY_DN14263_c0_g1_i1	2625	138	1383	362	2	-	3	123,11,230,	0,123,134,	138,1140,1153,
CK_88:598|ba9ff175-d94d-47ea-ac8f-c08b58fd5afd	510	0	510	TRINITY_DN8438_c0_g1_i1	1721	1022	1631	505	4	+	6	195,148,4,38,118,6,	0,196,344,348,386,504,	1022,1217,1366,1373,1414,1625,
CK_90:386|9531d589-6045-48d7-956c-7d97299b7f71	297	0	297	TRINITY_DN44043_c1_g1_i1	649	95	618	295	2	-	2	6,291,	0,6,	95,327,
CK_87:343|386a5712-dd47-4105-8ecc-23bff833c37e	254	0	253	TRINITY_DN69735_c1_g2_i2	1517	896	1158	252	0	+	7	35,85,9,40,21,49,13,	0,35,120,129,169,190,240,	896,935,1021,1032,1073,1096,1145,
CK_90:1499|16912ba0-8eb0-4911-9ea4-06f0e03f9d40	1430	0	1425	TRINITY_DN10724_c0_g1_i1	3164	166	2933	1419	6	-	2	716,709,	5,721,	166,2224,
CK_95:2418|1dfee4aa-a1d0-4eee-9736-42b07005305e	2331	0	2331	TRINITY_DN22558_c0_g1_i1	3208	557	2894	2311	6	+	19	631,394,66,355,52,5,5,58,24,8,26,61,59,24,51,307,13,98,80,	0,631,1026,1093,1448,1500,1505,1513,1571,1596,1606,1635,1696,1755,1780,1831,2138,2151,2251,	557,1190,1584,1650,2006,2059,2065,2074,2133,2157,2165,2195,2257,2318,2342,2394,2702,2716,2814,
CK_93:1720|fa4f45fb-ec19-49d4-9e26-6147a792bc9c	1627	0	1623	TRINITY_DN483_c0_g2_i1	2233	51	1886	1618	5	+	4	60,3,1490,70,	0,60,63,1553,	51,114,120,1816,
CK_99:1109|eced2b2a-5a7d-41ee-a645-31f6e83556fa	1022	3	1022	TRINITY_DN55137_c0_g1_i3	1496	21	1267	1017	1	-	3	957,8,53,	0,957,966,	21,1206,1214,
CK_102:640|db517a15-309a-442b-a27a-4991ed9bcfe9	542	4	542	TRINITY_DN4110_c0_g2_i3	1753	61	601	537	0	+	3	8,7,522,	4,12,20,	61,72,79,
CK_107:863|9cf3ed18-6b2b-4b05-b8cc-bb6cd65efbfd	762	0	759	TRINITY_DN50384_c0_g1_i3	1947	30	974	759	0	+	2	458,301,	0,458,	30,673,
CK_91:2177|edfe088c-d75f-48ef-a07e-629efafa3cd4	2095	1	2086	TRINITY_DN6019_c0_g1_i3	2519	100	2220	2075	3	+	3	165,478,1435,	1,173,651,	100,271,785,
CK_87:2930|91a1d16a-e7b3-45a0-8908-94e1f158015f	2865	3	2865	TRINITY_DN13220_c0_g1_i2	3084	97	2987	2862	0	+	3	750,1988,124,	3,753,2741,	97,873,2863,
CK_88:1339|ab29acee-51cd-41b9-a6e9-ad4d8753b994	1253	0	1253	TRINITY_DN13007_c0_g1_i3	1594	50	1334	1247	5	+	3	61,640,551,	0,62,702,	50,118,783,
CK_90:5966|d2fe440a-7669-4879-b937-9c81449b067a	5966	0	5948	TRINITY_DN1270_c0_g1_i8	7159	38	5986	5923	25	+	1	5948,	0,	38,
CK_97:1787|ab73ba8d-1426-47e4-924e-1881f0aad425	1715	4	1715	TRINITY_DN5363_c0_g1_i6	2782	156	2690	1707	4	+	3	86,961,664,	4,90,1051,	156,1064,2026,
CK_87:813|9aeac8fa-b176-43e6-a95b-e372028816cf	718	2	718	TRINITY_DN4824_c0_g1_i1	1737	91	1624	716	0	+	2	358,358,	2,360,	91,1266,
CK_87:1113|005c5706-b676-4cc9-b6e5-566bad0ece4a	1026	1	1026	TRINITY_DN63182_c7_g1_i1	1619	428	1457	1018	2	-	10	6,32,418,155,130,50,28,48,126,27,	0,7,39,458,615,745,795,823,871,998,	428,436,469,887,1042,1173,1224,1253,1304,1430,
CK_96:549|6baa2348-23c4-4ac1-baac-33d97a043f05	456	0	455	TRINITY_DN1704_c0_g1_i16	5085	4589	5045	452	2	+	4	384,17,11,42,	0,385,402,413,	4589,4973,4991,5003,
CK_99:2277|0fac889b-7521-40a0-8b79-3ca04c87246f	2186	0	2184	TRINITY_DN3261_c1_g1_i2	4610	2320	4585	2171	13	-	2	2178,6,	2,2180,	2320,4579,
CK_96:5685|9c4c08fa-ff11-48ab-8b8b-821dd0744519	5607	0	5607	TRINITY_DN4185_c0_g1_i1	6194	153	6068	5601	6	-	3	1082,3809,716,	0,1082,4891,	153,1462,5352,
CK_90:765|175efd91-a0aa-4919-9972-66facee2ec32	681	0	681	TRINITY_DN8125_c0_g1_i7	1194	123	862	679	1	+	3	653,22,5,	0,654,676,	123,791,857,
CK_97:509|98b2b1ea-995d-45d0-992d-f0c32f063ba8	412	0	412	TRINITY_DN18534_c0_g2_i2	2972	303	727	409	3	-	4	5,30,26,351,	0,5,35,61,	303,316,347,376,
CK_107:1917|a659f658-e5d5-4453-a70d-42be69a05bfc	1815	3	1815	TRINITY_DN16_c1_g1_i1	1902	27	1845	1804	7	+	5	58,870,37,134,712,	3,61,931,969,1103,	27,86,957,997,1133,
CK_83:505|16e0b409-510c-4cd4-b7fe-bda593391cc1	427	0	427	TRINITY_DN5919_c0_g1_i3	1268	39	641	423	4	+	4	286,51,85,5,	0,286,337,422,	39,326,384,636,
CK_95:4217|26d0bea5-bcba-4d62-9cfe-443556b1cffd	4144	0	4143	TRINITY_DN3017_c1_g1_i2	4467	47	4424	4137	0	-	3	3799,174,164,	1,3800,3980,	47,4076,4260,
CK_94:1436|077c164b-fdf1-494b-9aa9-ae5ec0467c89	1377	2	1377	TRINITY_DN13420_c0_g2_i1	1636	0	1372	1370	2	-	2	26,1346,	0,29,	0,26,
CK_106:429|1ef7b58f-9c2b-47a9-b84f-4583ea896e84	325	0	325	TRINITY_DN3388_c0_g1_i1	911	431	902	322	3	+	3	204,104,17,	0,204,308,	431,778,885,
CK_87:1372|42fd61f8-5752-4e53-a468-b3df24f1f97d	1296	0	1295	TRINITY_DN27381_c0_g1_i1	1649	0	1405	1286	9	+	2	287,1008,	0,287,	0,397,
CK_86:1291|f80f8517-e20a-4639-9873-b0ad4f9d9e74	1235	0	1235	TRINITY_DN3902_c1_g1_i2	2214	773	2118	1225	4	-	6	26,20,6,18,680,479,	0,26,46,52,70,756,	773,802,823,830,855,1639,
CK_88:4640|b577f2b3-cd49-401f-a644-089ade8f3ea0	4576	22	4571	TRINITY_DN1164_c1_g1_i3	4621	69	4621	4532	15	-	6	43,32,7,4346,65,54,	5,48,80,87,4433,4500,	69,114,147,155,4502,4567,
CK_89:510|e4ca1467-af45-40e6-a751-427727841d0a	424	0	424	TRINITY_DN2150_c30_g1_i1	2512	1020	1623	423	1	-	2	261,163,	0,261,	1020,1460,
CK_89:828|5b8f3fe5-3de3-47e6-b893-44e99b2130ad	744	0	744	TRINITY_DN17855_c0_g1_i1	1333	434	1180	739	4	-	4	20,6,522,195,	0,21,27,549,	434,454,461,985,
CK_109:629|4990a44a-309c-47e8-8678-4622e1ba0dd7	516	0	516	TRINITY_DN13212_c0_g1_i1	3379	2338	3295	513	0	+	3	389,119,5,	0,392,511,	2338,2728,3290,
CK_102:1021|3fd4af1f-2fb9-4199-a911-14ef23d04563	920	0	917	TRINITY_DN2671_c2_g1_i1	3079	127	1241	911	2	-	3	343,564,6,	3,346,914,	127,668,1235,
CK_96:1455|e25a0e55-6817-4862-a502-3faedb8e6d81	1354	0	1347	TRINITY_DN859_c2_g1_i1	5247	1297	2643	1342	2	+	5	1105,200,3,32,4,	0,1107,1307,1310,1343,	1297,2402,2603,2607,2639,
CK_88:1453|ba0bd292-22fc-405d-879b-9c6f427c0acc	1359	2	1359	TRINITY_DN14937_c0_g1_i1	1514	101	1508	1357	0	-	3	272,1018,67,	0,272,1290,	101,422,1441,
CK_83:391|29619b12-1c06-4447-b402-acaef5af841e	308	0	308	TRINITY_DN4671_c0_g1_i1	2815	1740	2053	306	0	+	4	114,37,29,126,	0,114,151,182,	1740,1856,1894,1927,
CK_91:1380|c9eb1815-c825-4105-845a-8c233a6da169	1311	2	1311	TRINITY_DN664_c1_g1_i1	2564	422	2463	1304	4	+	2	957,351,	2,960,	422,2112,
CK_97:456|7fb9678b-b6f7-45b5-bd04-9ce598a5d950	382	0	380	TRINITY_DN3628_c1_g1_i3	3357	710	1096	379	1	-	2	178,202,	2,180,	710,894,
CK_91:973|1299fcdb-f9cf-4b58-ab17-92ee0966a1fc	892	0	892	TRINITY_DN4642_c0_g1_i6	2358	1381	2339	887	5	-	2	404,488,	0,404,	1381,1851,
CK_102:522|87e1e0d2-b246-42bf-b325-4cf4d7fc73e4	427	0	426	TRINITY_DN13061_c0_g1_i7	4646	2034	2633	425	1	-	2	215,211,	1,216,	2034,2422,
CK_104:1461|255bb648-9c5c-42c5-92a6-443394010212	1375	1	1373	TRINITY_DN11330_c0_g1_i14	3764	1503	3557	1369	3	+	3	475,854,43,	1,476,1330,	1503,2659,3514,
CK_102:536|90c50467-a72d-4c62-9994-311956475608	438	1	438	TRINITY_DN16251_c1_g2_i2	596	0	462	434	3	-	3	48,79,310,	0,48,127,	0,66,152,
CK_98:348|198e8ba8-2dcd-4128-bf19-1fb5132e9a5b	255	0	255	TRINITY_DN7353_c0_g1_i1	1447	1180	1438	253	1	+	4	200,26,14,14,	0,200,226,241,	1180,1381,1408,1424,
CK_93:1148|683fa74f-2083-4c81-8275-6798920c6692	1065	2	1062	TRINITY_DN6567_c0_g1_i3	4749	75	3845	1057	1	+	2	206,852,	2,210,	75,2993,
CK_78:355|14dddfdd-b418-46bc-895c-28b4c7f08869	293	0	291	TRINITY_DN2418_c1_g2_i8	2465	1524	2011	291	0	-	2	286,5,	2,288,	1524,2006,
CK_90:603|479bd5d7-223b-473c-9fcc-44e9caeab467	517	0	513	TRINITY_DN5631_c1_g1_i1	1988	1441	1954	513	0	+	1	513,	0,	1441,
CK_107:5781|0872e944-c6ae-4e77-92a1-1052ddf341b9	5689	3	5687	TRINITY_DN6647_c0_g1_i1	11865	132	5857	5667	6	+	6	1895,2463,13,1292,4,6,	3,1899,4369,4382,5675,5681,	132,2027,4495,4555,5847,5851,
CK_101:1761|fc62eb09-cfb1-4d39-bfc7-5eeb1475f461	1678	0	1678	TRINITY_DN5537_c0_g1_i3	4130	2413	4093	1672	4	+	6	1406,182,24,17,9,38,	0,1406,1588,1613,1631,1640,	2413,3820,4004,4028,4045,4055,
CK_85:790|3bdd22a4-11d8-4415-a736-b72159e7767e	716	0	716	TRINITY_DN1556_c0_g1_i4	1316	124	1217	711	2	+	3	397,310,6,	0,400,710,	124,521,1211,
CK_100:655|1bc90dc2-7f56-47e5-97d2-5807218c3497	558	0	557	TRINITY_DN25088_c0_g2_i1	3221	62	1435	557	0	-	5	64,22,50,143,278,	1,65,87,137,280,	62,127,150,201,1157,
CK_104:416|24cdc9d0-fb43-4f2a-b1c0-4edd5e52a58d	313	1	313	TRINITY_DN4369_c1_g1_i3	4721	1582	2923	312	0	-	4	82,7,116,107,	0,82,89,205,	1582,1688,1722,2816,
CK_101:1892|c746031b-80cb-45e8-919b-9c57d68cad0f	1865	3	1864	TRINITY_DN918_c0_g1_i3	4065	1127	3920	1857	0	-	3	1299,17,541,	1,1300,1321,	1127,3359,3379,
CK_103:1841|4561f651-e81e-458a-962f-63a8d5adf755	1777	7	1777	TRINITY_DN1220_c4_g1_i2	1962	146	1962	1763	7	+	2	1761,9,	7,1768,	146,1953,
CK_96:3119|c2b9e4f0-124c-426c-b6f2-7d0fde435ed3	3031	4	3024	TRINITY_DN294_c0_g1_i2	7727	0	7727	3017	3	-	2	91,2929,	7,98,	0,4798,
CK_98:331|66d84e29-2c20-4252-80e6-290fd49fc098	238	0	238	TRINITY_DN42741_c0_g1_i2	1049	468	858	237	1	+	2	232,6,	0,232,	468,852,
CK_110:3117|a8213afc-42ed-418d-9a2a-29a1135d65fd	3018	3	3013	TRINITY_DN6781_c0_g3_i2	3923	837	3868	3005	3	-	6	68,6,78,113,793,1950,	5,74,80,158,272,1065,	837,905,913,997,1110,1918,
CK_102:1167|e1c0797e-c7de-40cf-86e1-0e84e30b3067	1063	1	1063	TRINITY_DN7161_c0_g2_i2	2290	287	1352	1055	3	+	4	553,85,78,342,	1,557,642,721,	287,845,932,1010,
CK_101:427|82dd80d7-4449-4f05-9f95-ba200e535b43	332	0	332	TRINITY_DN4117_c0_g3_i2	775	421	758	329	2	+	3	156,87,88,	0,156,244,	421,581,670,
CK_107:3178|f17fafd5-6fc1-4e23-a98e-34923dadaac4	3065	5	3064	TRINITY_DN9733_c0_g1_i1	3599	0	3060	3056	3	+	2	4,3055,	5,9,	0,5,
CK_86:1963|904f8325-9873-43fd-ad48-c57378e5a576	1905	6	1900	TRINITY_DN27062_c0_g1_i1	2382	202	2366	1891	3	+	2	388,1506,	6,394,	202,860,
CK_84:1110|8431d669-6f8f-4b96-b019-247197e61e94	1020	1	1016	TRINITY_DN5750_c0_g1_i2	4068	2994	4009	1013	2	+	1	1015,	1,	2994,
CK_107:634|42a3f615-23ac-4e52-9926-96ab31084920	526	0	525	TRINITY_DN11144_c1_g1_i6	4512	2454	2979	525	0	+	1	525,	0,	2454,
CK_92:350|de08b1e7-20f8-4fdc-8c07-d60fe55df49e	254	0	254	TRINITY_DN5919_c0_g1_i3	1268	50	707	252	2	+	2	248,6,	0,248,	50,701,
CK_112:336|0c5d6b61-9b32-4484-9079-f849f7711c31	221	0	220	TRINITY_DN108741_c0_g1_i1	707	49	595	219	1	-	2	214,6,	1,215,	49,589,
CK_98:699|82391e9e-0b2d-4d3a-9f54-dae8914ef6dc	612	0	612	TRINITY_DN30435_c3_g1_i2	3113	463	1081	606	4	+	5	47,45,41,41,436,	0,47,94,135,176,	463,512,557,599,645,
CK_89:300|0346c53e-3486-4f82-aac3-af7f342f179c	215	0	215	TRINITY_DN2346_c1_g2_i1	1237	436	759	214	1	+	2	210,5,	0,210,	436,754,
CK_91:1320|4751cb71-0cfb-4bda-b376-0a63b71ccb84	1250	3	1245	TRINITY_DN5925_c0_g1_i1	2155	537	2014	1242	0	-	2	1168,74,	5,1173,	537,1940,
CK_85:308|e43712ee-37c0-4b51-a843-cb7347dea1dd	226	0	226	TRINITY_DN757_c0_g1_i4	2878	716	1328	225	1	-	2	220,6,	0,220,	716,1322,
CK_106:1246|76f71dd0-2773-4fe0-ba2e-4d1e1d571c7d	1143	2	1141	TRINITY_DN4519_c0_g1_i6	2489	978	2455	1135	4	+	4	377,697,6,59,	2,379,1076,1082,	978,1690,2388,2396,
CK_103:1022|e21b2c4d-7f1d-4717-a260-16583fda9e80	921	0	921	TRINITY_DN13030_c0_g1_i2	1161	70	1098	915	2	-	4	85,36,247,549,	0,85,125,372,	70,157,199,549,
CK_94:1268|3c04fdb7-3873-41b5-b140-871c1a104e7f	1167	0	1167	TRINITY_DN27378_c0_g1_i17	2270	23	1248	1162	5	-	3	807,95,265,	0,807,902,	23,887,983,
CK_87:1953|43704fd5-4ef5-4db0-93b5-820b8a589f87	1887	0	1886	TRINITY_DN1279_c2_g1_i12	2292	235	2219	1884	2	-	2	479,1407,	1,480,	235,812,
CK_100:2289|f98cdfdf-1931-4d39-a613-af889ce6c546	2212	3	2210	TRINITY_DN58589_c0_g1_i3	2502	94	2501	2201	6	+	3	1449,671,87,	3,1452,2123,	94,1673,2414,
CK_107:1119|d4586506-e73d-4126-bab5-1a9c7eb80261	1030	5	1030	TRINITY_DN2642_c1_g1_i7	2165	39	2113	1021	4	-	2	604,421,	0,604,	39,1692,
CK_99:1437|4ff8fb21-0ca7-4109-a1e7-070fc110226d	1339	0	1337	TRINITY_DN783_c0_g1_i8	2237	13	1930	1329	5	+	3	294,8,1032,	0,297,305,	13,307,898,
CK_85:509|42d1e89e-d42e-41d1-98e0-e33c750ec693	437	1	437	TRINITY_DN8025_c0_g1_i1	830	0	784	435	1	+	5	302,18,4,107,5,	1,303,321,325,432,	0,303,322,330,779,
CK_108:2500|ac6ad563-94aa-4c5f-bb07-be42ed8e26e3	2393	7	2390	TRINITY_DN900_c0_g1_i3	3340	156	3249	2373	8	-	5	18,10,838,408,1107,	3,22,33,871,1279,	156,174,184,1593,2142,
CK_88:437|92bea7ed-a778-4e26-bee6-6f12f02bbe81	351	0	351	TRINITY_DN33259_c0_g2_i1	2565	1036	1387	351	0	-	1	351,	0,	1036,
CK_110:345|46819ca4-b961-4dc9-9316-f5328977e1b9	234	2	234	TRINITY_DN2116_c0_g1_i8	5348	1048	1727	232	0	-	2	10,222,	0,10,	1048,1505,
CK_106:494|88bddf3a-5e5e-485c-962c-9d14a2b4b245	390	0	390	TRINITY_DN5330_c0_g1_i8	7042	5859	6706	390	0	+	2	64,326,	0,64,	5859,6380,
CK_88:611|bc947095-2168-4f19-84cb-810a519e4c94	524	3	524	TRINITY_DN8948_c0_g1_i1	2311	67	694	520	1	+	2	516,5,	3,519,	67,689,
CK_103:529|61d57fe9-d373-4e0a-a829-9956e728af2a	437	3	437	TRINITY_DN3388_c0_g1_i1	911	46	899	434	0	+	3	194,203,37,	3,197,400,	46,657,862,
CK_97:848|e6fd0ca4-f57f-4872-9fa3-254b112b36bf	750	0	745	TRINITY_DN2642_c1_g1_i7	2165	66	2101	745	0	-	3	483,160,102,	5,488,648,	66,1692,1999,
CK_88:370|7e2bea84-4645-4a42-ae7d-f4ace1e402fd	282	0	282	TRINITY_DN116535_c0_g1_i1	999	501	785	281	0	-	5	16,55,51,110,49,	0,16,71,123,233,	501,518,574,625,736,
CK_105:757|5eea7d03-9caa-44d6-9b21-f1a5c2b1bbca	651	0	651	TRINITY_DN29374_c0_g1_i1	1044	166	815	648	1	-	3	203,5,441,	0,204,210,	166,369,374,
CK_105:1040|8b02d189-109b-45af-a325-90e2b628363d	945	2	944	TRINITY_DN35800_c0_g1_i3	1086	8	952	939	0	-	3	88,46,805,	1,92,138,	8,100,147,
CK_102:1269|00a3b6ef-5187-4e8e-8bc5-03c78128d056	1185	1	1185	TRINITY_DN4152_c0_g2_i1	4247	156	3762	1175	8	-	3	26,271,886,	0,27,298,	156,184,2876,
CK_88:1036|f64621ff-a4f7-4aa6-88dd-290cbd050a1c	947	2	944	TRINITY_DN3311_c0_g1_i4	1368	19	1197	939	2	-	3	22,7,912,	3,26,33,	19,41,285,
CK_103:780|a93a7933-2ef0-49d9-ab4c-13de0ee6bb4f	677	1	677	TRINITY_DN103_c2_g1_i1	1854	419	1582	674	2	+	2	536,140,	1,537,	419,1442,
CK_104:1027|5b7c8827-223d-4513-91c8-3ffb93d97f94	930	0	923	TRINITY_DN38907_c0_g1_i1	1580	64	1210	922	0	-	3	464,268,190,	7,471,740,	64,616,1020,
CK_98:1085|491de9a8-e493-4b74-ad26-ec900dad5013	1018	0	1016	TRINITY_DN6388_c0_g1_i1	5240	599	2533	1016	0	+	2	849,167,	0,849,	599,2366,
CK_101:2798|3d3122c6-e22a-45f2-ae6f-9b92b9bb6ded	2719	2	2713	TRINITY_DN2679_c0_g2_i17	2985	36	2956	2711	0	+	4	1746,211,708,46,	2,1748,1959,2667,	36,1875,2199,2910,
CK_102:1649|0ec99894-cb07-4ddb-93d3-64d67df1cf22	1571	4	1571	TRINITY_DN8219_c0_g1_i7	2141	31	1756	1562	5	+	3	183,123,1261,	4,187,310,	31,215,495,
CK_99:504|ba210e98-2151-490d-9e3a-e84cac2e3337	420	0	420	TRINITY_DN246_c0_g1_i1	1826	1210	1804	419	1	+	2	408,12,	0,408,	1210,1792,
CK_99:545|9f1df4d3-963d-4011-bb11-6075710b3eca	446	0	446	TRINITY_DN4782_c1_g1_i2	545	70	517	444	1	+	3	398,4,43,	0,399,403,	70,468,474,
CK_90:1527|cc96d99d-fa84-4be2-b01b-accbfa154ec4	1450	2	1450	TRINITY_DN14797_c0_g1_i4	1907	386	1835	1446	2	-	2	13,1435,	0,13,	386,400,
CK_90:1762|91945ed7-4ba7-406b-a340-da9259287a53	1676	3	1672	TRINITY_DN558_c0_g1_i4	1910	191	1860	1663	6	-	1	1669,	4,	191,
CK_92:558|9f4d6218-e93f-42e0-8bbd-495aedd8d268	464	0	464	TRINITY_DN25997_c0_g1_i1	1465	48	516	462	2	+	4	154,149,83,78,	0,154,303,386,	48,203,354,438,
CK_105:1782|fa2014cb-b837-4bb7-a18e-3837f4f8979e	1672	0	1671	TRINITY_DN9330_c0_g1_i1	1821	133	1802	1664	5	+	3	1602,14,53,	0,1603,1618,	133,1735,1749,
CK_85:1452|50a5c5e7-3a04-4f95-aac2-f85fb7abc9ec	1367	1	1366	TRINITY_DN182_c0_g1_i3	1806	104	1622	1354	9	+	3	307,949,107,	1,310,1259,	104,412,1515,
CK_102:427|951d0875-3197-4a0a-a602-bc654d6800d7	331	0	331	TRINITY_DN6584_c0_g1_i4	1527	112	662	330	1	-	2	7,324,	0,7,	112,338,
CK_101:1792|b768a191-c6a5-4a0e-84fe-943f76c9003c	1694	3	1694	TRINITY_DN3459_c1_g1_i2	2670	349	2347	1688	3	-	6	13,21,14,116,84,1443,	0,13,34,48,164,248,	349,624,647,662,779,904,
CK_85:376|a5e91c3c-f6e6-4b6f-8359-452905b8630b	288	0	288	TRINITY_DN12114_c0_g1_i1	1074	673	964	286	2	+	3	186,42,60,	0,186,228,	673,860,904,
CK_98:2589|bb2f6c36-a453-4920-a3e8-737d65cddbcb	2508	4	2505	TRINITY_DN7709_c0_g1_i1	2560	10	2511	2492	8	+	3	9,47,2444,	4,14,61,	10,19,67,
CK_2647:3247|954a73e5-bc44-4779-a85e-77518e78f6b0	605	3	602	TRINITY_DN1292_c0_g1_i1	3065	89	1273	599	0	-	2	271,328,	3,274,	89,945,
CK_104:1473|d4cdb886-92f8-4569-b325-97a665b915b9	1380	2	1380	TRINITY_DN31164_c0_g1_i2	2203	760	2159	1368	8	-	6	838,154,158,57,144,25,	0,838,993,1151,1208,1353,	760,1600,1754,1915,1982,2134,
CK_109:1307|9fade4fe-605b-4b9e-9ad7-3859a4217c9f	1204	0	1204	TRINITY_DN4958_c0_g1_i4	2569	888	2116	1195	1	-	3	789,13,394,	0,790,810,	888,1701,1722,
CK_101:313|30b45814-c5a4-400c-9e56-3fe16b806165	214	0	214	TRINITY_DN6182_c0_g2_i2	896	9	279	212	1	-	3	6,101,106,	0,7,108,	9,20,173,
CK_93:878|649cba51-b978-4d3f-bc97-b51eca037809	787	0	783	TRINITY_DN84544_c0_g1_i5	2677	97	2280	781	2	-	3	140,570,73,	4,144,714,	97,713,2207,
CK_100:1622|2a0c703b-8829-4e1c-8b0b-f207ddb4cc7c	1538	10	1538	TRINITY_DN482_c2_g1_i1	3296	0	1569	1524	4	+	2	527,1001,	10,537,	0,568,
CK_103:644|7c62277e-fac9-4d40-942c-4c7abaa415b5	545	3	545	TRINITY_DN11510_c0_g1_i1	718	2	638	540	1	-	5	35,13,33,40,420,	0,36,49,82,122,	2,37,141,177,218,
CK_97:524|137e8f72-62f3-4d6f-a709-b6a4fc780f91	449	0	449	TRINITY_DN3105_c0_g1_i5	1816	894	1758	445	4	-	2	6,443,	0,6,	894,1315,
CK_91:1930|ac686650-46a7-49bc-8892-8df0e90977e1	1845	0	1840	TRINITY_DN4083_c0_g1_i6	2369	208	2046	1829	5	-	5	15,12,59,220,1528,	5,22,35,96,317,	208,223,235,294,518,
CK_107:3696|b5744bd5-b638-41f6-a9f5-a3f7f48177d9	3609	0	3606	TRINITY_DN1094_c0_g1_i10	4079	167	3771	3579	13	-	10	39,2534,445,42,38,70,13,61,60,290,	3,42,2579,3028,3071,3110,3181,3194,3256,3319,	167,207,2741,3189,3231,3269,3339,3353,3414,3481,
CK_88:1440|d96ece12-431f-4b08-8f17-79dc964e5994	1361	0	1358	TRINITY_DN282_c0_g1_i2	4125	875	2839	1353	0	-	4	296,4,983,70,	3,300,304,1291,	875,1171,1778,2769,
CK_107:595|f9509aeb-1407-427d-8125-23eadd1699fd	493	1	493	TRINITY_DN19613_c0_g2_i1	1575	0	698	490	1	-	2	10,481,	0,11,	0,217,
CK_107:2498|6f5eef80-d14a-4260-8a64-733252f67e7b	2388	0	2386	TRINITY_DN4854_c0_g1_i3	3660	826	3514	2381	3	+	4	1410,908,19,47,	0,1410,2320,2339,	826,2539,3447,3467,
CK_100:327|efbe088d-1aa9-4518-b989-348344e1adc1	231	0	230	TRINITY_DN3_c1_g1_i2	1648	759	1586	230	0	-	2	193,37,	1,194,	759,1549,
CK_104:2946|820b0200-3060-45c7-98dd-c7a5754bf91e	2870	3	2856	TRINITY_DN3686_c0_g1_i4	3033	146	3023	2848	5	+	4	2693,3,119,38,	3,2696,2699,2818,	146,2858,2864,2985,
CK_105:1639|ba0a134a-ba05-4040-9d01-b74cf48a9f9d	1545	4	1542	TRINITY_DN103_c2_g1_i1	1854	62	1635	1533	5	+	2	720,818,	4,724,	62,817,
CK_97:652|5c8d7923-bf2d-4bd9-bffa-e6805e3991f7	562	3	562	TRINITY_DN4153_c0_g1_i1	1915	0	1812	557	2	+	2	161,398,	3,164,	0,1414,
CK_106:1937|0f38c7d5-00d5-4ff2-825e-c4af8d0cfa09	1837	3	1834	TRINITY_DN1684_c1_g1_i1	2382	20	2241	1819	11	-	2	1739,91,	3,1743,	20,2150,
CK_100:3010|b708d743-1411-499e-89af-41e81f94af7f	2964	3	2964	TRINITY_DN10184_c0_g1_i4	3359	27	3359	2937	6	-	3	1980,946,17,	0,1980,2944,	27,2377,3342,
CK_92:940|236a8f18-9979-4e72-acf3-ced702f77a27	853	0	853	TRINITY_DN2899_c1_g1_i1	2663	1677	2543	846	5	+	9	228,134,57,215,42,35,57,77,6,	0,228,362,419,635,677,712,769,847,	1677,1906,2041,2102,2317,2360,2396,2457,2537,
CK_88:595|c506f9d4-1d4d-45b4-8077-a035272ac066	512	0	512	TRINITY_DN40695_c0_g1_i1	2019	1234	1894	510	1	-	3	92,386,33,	0,92,479,	1234,1475,1861,
CK_108:859|c39d5a1a-c81f-4479-b420-4071d7b566c9	751	3	751	TRINITY_DN692_c0_g1_i10	2898	22	2832	747	1	+	2	441,307,	3,444,	22,2525,
CK_106:1297|c68f9033-24e4-4639-aaab-8ec05ef23691	1228	3	1226	TRINITY_DN7762_c1_g1_i1	1320	15	1261	1222	1	-	2	1097,126,	2,1099,	15,1135,
CK_103:738|c3476622-8c37-49fc-bae1-64298835d381	645	3	645	TRINITY_DN3488_c0_g1_i30	3119	1040	1680	640	0	+	2	631,9,	3,636,	1040,1671,
CK_103:854|5c515e41-ff0d-40bf-beea-e12866ec171a	756	3	756	TRINITY_DN23634_c0_g4_i1	2810	647	2684	752	1	+	2	515,238,	3,518,	647,2446,
CK_90:1129|39cb6ff9-5929-417d-a866-7f433a669067	1041	0	1037	TRINITY_DN5505_c0_g3_i1	1843	17	1129	1034	3	-	2	112,925,	4,116,	17,204,
CK_49:621|b878f4ee-5d25-4966-a24c-a3d379cdcd9c	578	0	578	TRINITY_DN134_c0_g1_i2	1575	516	1506	576	2	+	3	284,288,6,	0,284,572,	516,1189,1500,
CK_102:414|c6a2fdb2-e30e-439c-a697-52f115179a53	314	0	314	TRINITY_DN32361_c2_g1_i1	1110	22	343	312	2	-	6	32,29,31,22,25,175,	0,32,61,92,114,139,	22,55,87,119,142,168,
CK_93:711|5cceb0f9-a088-4e10-ada8-180eac627e4a	629	0	629	TRINITY_DN815_c0_g1_i18	2209	106	2204	626	3	+	4	421,4,198,6,	0,421,425,623,	106,1115,1814,2198,
CK_98:398|bdd7ec9c-0b0f-4cba-9553-0f7099a66f66	299	0	299	TRINITY_DN18534_c0_g2_i2	2972	1601	1977	299	0	+	2	294,5,	0,294,	1601,1972,
CK_105:3732|fae34db0-1228-4f7c-bb22-cd35857b88b8	3653	3	3653	TRINITY_DN8656_c0_g1_i1	14164	49	3728	3635	3	+	7	1520,42,28,786,7,491,764,	3,1523,1566,1594,2381,2398,2889,	49,1570,1612,1641,2429,2441,2964,
CK_90:406|0d1887fa-2679-4fe0-aedd-d22f519fbfae	301	0	301	TRINITY_DN35301_c0_g1_i1	793	73	691	299	0	+	3	10,141,148,	0,12,153,	73,87,543,
CK_109:353|f58cdc03-e157-4bdd-be00-08d7a1f0691b	246	2	246	TRINITY_DN529_c0_g1_i6	1817	662	937	244	0	+	3	38,189,17,	2,40,229,	662,701,920,
CK_109:1449|fb6e9a42-97c9-44ad-86b3-95654760d661	1378	3	1375	TRINITY_DN1281_c0_g1_i5	3800	782	3456	1372	0	-	3	1293,3,76,	3,1296,1299,	782,2147,3380,
CK_90:596|64210e4e-0108-4f99-8911-d50685937dbe	502	0	502	TRINITY_DN2150_c5_g1_i1	1917	636	1185	499	1	+	2	14,486,	0,16,	636,699,
CK_100:936|acbe1772-54e6-4701-a873-74fb4ffada1c	832	4	832	TRINITY_DN3388_c0_g1_i1	911	42	908	824	4	+	3	246,559,23,	4,250,809,	42,323,885,
CK_90:498|758a4fd2-b35b-41a1-9509-4066644dcaf0	416	0	414	TRINITY_DN20783_c0_g1_i2	1980	22	436	412	1	-	3	12,6,395,	2,14,21,	22,35,41,
CK_90:1082|65fd54c6-7f43-4330-9951-540e5f997e89	990	0	987	TRINITY_DN7517_c0_g1_i5	3163	131	1346	986	1	+	2	935,52,	0,935,	131,1294,
CK_93:544|588bf516-2c20-449c-bdf5-b3612fd0b984	456	0	453	TRINITY_DN1477_c4_g1_i13	953	86	606	452	1	-	2	412,41,	3,415,	86,565,
CK_87:545|b1170846-5449-466a-8000-c9e8ddf322df	462	1	462	TRINITY_DN13171_c1_g1_i1	984	427	964	458	0	+	4	396,14,43,5,	1,398,414,457,	427,828,843,959,
CK_110:1200|efa202d3-81e2-45d5-8e29-1e55f5901388	1089	0	1089	TRINITY_DN2838_c0_g1_i5	2815	1651	2736	1080	5	+	3	491,260,334,	0,494,755,	1651,2142,2402,
CK_104:402|a0f451f6-d94d-4c57-9b01-f4ad8fc536ef	298	1	298	TRINITY_DN50658_c0_g1_i1	835	206	507	296	1	+	4	84,51,116,46,	1,85,136,252,	206,291,343,461,
CK_107:989|cfd3e979-7007-4323-9bc0-b16a2b9392ac	903	0	901	TRINITY_DN41003_c0_g1_i1	1567	51	1540	897	3	-	5	11,186,2,693,8,	2,13,200,202,895,	51,63,555,597,1532,
CK_99:709|55a3f80a-ee45-4cca-9e13-ae533b95134c	626	2	626	TRINITY_DN2098_c1_g1_i1	1285	113	1148	622	2	+	4	15,161,7,441,	2,17,178,185,	113,129,576,707,
CK_92:352|ed194094-7818-4991-aac7-e8defee7c58e	260	0	260	TRINITY_DN1549_c2_g1_i5	5361	2678	2939	258	2	+	2	249,11,	0,249,	2678,2928,
[truncated: 35,827 more rows]

## Sheet: Supplementary Table S6
Supplementary Table S6. The alignment between unique dodecaploids ONT reads and longest assembled contigs
qName	qSize	qStart	qEnd	tName	tSize	tStart	tEnd	matches	misMatches	strand	blockCount	blockSizes	qStarts	tStarts
HS_87:1568|7c552b38-a730-4da8-95db-d2a0a172c8c4	1491	0	1487	TRINITY_DN15846_c0_g1_i1	1919	256	1904	1477	2	+	3	716,538,225,	0,724,1262,	256,1140,1679,
HS_107:331|f9e0611c-f13d-4d55-9e7e-b8ddbc5fd026	229	1	229	TRINITY_DN5861_c0_g2_i1	2233	809	1167	228	0	+	2	223,5,	1,224,	809,1162,
HS_96:500|d760f5a5-acef-4a45-97ff-5c3ecbd19158	408	0	408	TRINITY_DN10242_c0_g1_i1	857	30	589	406	2	+	3	336,65,7,	0,336,401,	30,369,582,
HS_80:1808|53b935d6-09c1-4ce1-9f6d-1bb5ab61cc77	1724	7	1720	TRINITY_DN1056_c0_g1_i11	3361	1252	3345	1713	0	-	2	1603,110,	4,1607,	1252,3235,
HS_88:904|5e01fe57-b24f-45e9-a99a-f08464f2ae77	824	0	824	TRINITY_DN6777_c0_g1_i2	5515	27	854	816	3	+	5	9,16,17,4,773,	0,9,29,46,51,	27,37,58,77,81,
HS_90:424|d5e41af9-dc57-4866-bb71-0554de564679	334	0	334	TRINITY_DN2447_c0_g1_i1	1511	1153	1500	331	3	+	4	221,13,72,28,	0,221,234,306,	1153,1375,1389,1472,
HS_110:872|e9fd2052-6511-4b99-8677-a2920ca41ec2	761	2	760	TRINITY_DN5144_c1_g1_i2	1854	778	1670	757	1	-	2	466,292,	1,467,	778,1378,
HS_86:3586|f350dc17-f7cf-4549-9474-c7f0d2f3844e	3516	0	3512	TRINITY_DN9699_c0_g1_i1	3681	31	3648	3502	9	+	4	1236,2255,8,12,	0,1236,3492,3500,	31,1369,3627,3636,
HS_102:734|78e5ce12-dc3f-460d-82c6-6f2867b776b6	634	0	628	TRINITY_DN1165_c0_g1_i1	2047	125	840	628	0	-	3	191,218,219,	6,197,415,	125,317,621,
HS_88:378|e296af34-6a49-43c5-a3b6-941787974540	293	0	293	TRINITY_DN6623_c0_g2_i1	2710	2344	2644	292	0	+	2	285,7,	0,286,	2344,2637,
HS_100:756|5fbee3ff-a0d1-48a2-8b02-a286fa763afe	656	0	656	TRINITY_DN287_c6_g1_i8	2694	1873	2544	653	3	-	12	49,134,20,55,47,5,25,81,20,4,155,61,	0,49,183,203,258,305,310,335,416,436,440,595,	1873,1923,2060,2081,2138,2187,2193,2219,2301,2322,2327,2483,
HS_100:1796|33c5b739-ade5-49a9-802e-e84adacfa73a	1708	1	1708	TRINITY_DN28802_c0_g1_i10	1875	55	1762	1707	0	+	1	1707,	1,	55,
HS_92:1096|42f2f646-4199-43a0-9098-bf832a3f4266	1004	0	1004	TRINITY_DN1223_c0_g1_i2	2409	52	2371	995	9	+	2	660,344,	0,660,	52,2027,
HS_106:339|50d7d763-9b3f-446f-ad32-49c283bcb9db	239	1	239	TRINITY_DN51338_c0_g1_i1	2051	122	363	237	0	+	3	192,8,37,	1,194,202,	122,317,326,
HS_75:1867|e48934da-4eac-4d44-8a34-63ae7874d52d	1784	0	1784	TRINITY_DN34963_c0_g1_i2	2266	169	2185	1781	3	+	5	91,56,46,1582,9,	0,91,147,193,1775,	169,261,318,507,2176,
HS_103:897|db48efa7-bf22-4543-a920-62c8a5a17799	795	2	795	TRINITY_DN9191_c0_g1_i1	1550	41	1485	792	1	-	2	208,585,	0,208,	41,900,
HS_89:2384|3cdc5f0a-6403-4e1d-b385-ec7613a8921c	2324	14	2320	TRINITY_DN8348_c0_g1_i2	2554	176	2486	2304	2	-	2	233,2073,	4,237,	176,413,
HS_102:349|d8e65fc3-bf5c-4350-9b8a-41e7c9a1f1fe	246	0	246	TRINITY_DN1964_c0_g1_i17	2047	1711	2019	245	1	+	2	238,8,	0,238,	1711,2011,
HS_99:1516|89c868e4-439d-4c58-a42f-4c4b62c0fccf	1421	3	1417	TRINITY_DN6226_c0_g1_i19	3348	31	1446	1412	2	+	2	890,524,	3,893,	31,922,
HS_109:694|4e1536e5-74a9-4548-a34a-cf182b929297	590	3	590	TRINITY_DN10760_c1_g1_i1	737	26	630	586	1	-	4	26,7,513,41,	0,26,33,546,	26,62,70,589,
HS_82:737|bb251ecb-407f-463a-9d21-5ea30bb3e3b2	689	0	687	TRINITY_DN7001_c0_g1_i3	1747	62	1629	687	0	-	4	211,2,417,57,	2,213,215,632,	62,802,805,1572,
HS_97:345|2ce011e8-b53b-4bb5-a392-72b2c498b9ea	252	0	252	TRINITY_DN2539_c0_g1_i6	2733	8	402	251	1	-	2	139,113,	0,139,	8,289,
HS_97:375|b5c8da1f-e110-4e8f-a996-8a5020d92273	276	0	275	TRINITY_DN84_c8_g1_i2	727	221	551	275	0	-	3	9,259,7,	1,10,269,	221,238,544,
HS_101:1311|c50fb6a6-41ae-49e8-8d9a-cb0f8a1e8d5a	1233	0	1233	TRINITY_DN6740_c0_g1_i1	1438	60	1293	1232	1	+	1	1233,	0,	60,
HS_111:838|81d18824-7f32-43cd-9171-a543043fb867	725	0	725	TRINITY_DN365_c1_g1_i5	2757	1949	2674	718	7	-	1	725,	0,	1949,
HS_99:1154|14786961-c0ef-4ef1-aa13-0082d83d1919	1076	0	1076	TRINITY_DN218_c0_g1_i3	1959	848	1925	1069	3	+	2	1060,12,	0,1064,	848,1913,
HS_103:649|66ab4294-1b71-4979-9d50-f2adbfd173c8	545	0	545	TRINITY_DN6566_c0_g1_i1	1909	980	1712	542	3	+	3	405,135,5,	0,405,540,	980,1386,1707,
HS_102:410|34cfe1a0-cfab-4cf1-8448-a3837ad5fd8f	310	0	310	TRINITY_DN57394_c0_g1_i1	733	75	386	309	0	-	4	186,60,25,38,	0,186,247,272,	75,262,322,348,
HS_98:1067|a4a984d2-ae6c-4e40-af05-61fea8a9ea6d	972	2	968	TRINITY_DN11054_c0_g1_i1	1136	130	1099	965	1	+	4	904,11,34,17,	2,906,917,951,	130,1035,1047,1082,
HS_92:1366|00aee7ea-82ce-4fe3-9f23-d631f226ffd9	1287	5	1280	TRINITY_DN424_c3_g2_i1	2974	0	1518	1275	0	+	2	66,1209,	5,71,	0,309,
HS_98:1828|99c02601-b4d2-4127-bba8-aa825f3f8a71	1738	0	1738	TRINITY_DN9586_c0_g2_i1	3734	120	1858	1725	10	+	5	7,460,1214,7,47,	0,7,469,1683,1691,	120,128,589,1804,1811,
HS_100:759|bfe37972-8070-43e2-bf10-ceb8965b111c	667	1	665	TRINITY_DN9740_c0_g1_i11	2150	433	1917	663	1	+	3	336,249,79,	1,337,586,	433,1587,1838,
HS_81:919|3d19065f-492a-4e7e-aec6-922cb3f585c0	854	4	854	TRINITY_DN1435_c0_g1_i17	5245	78	1174	848	2	+	3	9,171,670,	4,13,184,	78,88,504,
HS_98:774|73e8df33-229c-4170-9739-e74a433d02f5	680	1	679	TRINITY_DN6690_c0_g1_i1	1064	39	807	677	0	-	3	433,228,16,	1,434,663,	39,561,791,
HS_82:617|8ec7cdec-64b6-46c2-8368-d317da261c52	537	1	536	TRINITY_DN153840_c0_g1_i1	1915	1118	1654	532	3	-	2	152,383,	1,153,	1118,1271,
HS_99:1815|23ba2a7d-ffe8-49ee-8f40-2178dc6854ba	1724	1	1724	TRINITY_DN7675_c0_g1_i2	2400	374	2163	1721	1	+	3	99,449,1174,	1,100,550,	374,476,989,
HS_97:1332|9c996249-2cba-4ab9-97dc-090914b6913b	1242	2	1240	TRINITY_DN4383_c0_g1_i13	3097	1857	3095	1238	0	+	1	1238,	2,	1857,
HS_110:534|0b5e30bd-4fd1-4b0d-99c0-eb4b3be14c1d	429	0	429	TRINITY_DN45227_c0_g1_i2	1516	1083	1512	425	2	+	3	127,282,18,	0,127,411,	1083,1212,1494,
HS_93:1412|44d00bbc-90e4-4075-9e44-a2b60f601561	1329	0	1329	TRINITY_DN5991_c0_g1_i4	2347	716	2330	1324	5	+	2	51,1278,	0,51,	716,1052,
HS_104:1957|12ea7244-6197-423e-b541-b04f53206de9	1851	3	1844	TRINITY_DN2144_c0_g1_i13	2540	15	2509	1838	3	-	3	121,560,1160,	7,128,688,	15,234,1349,
HS_90:1482|842f06d3-30a0-4335-bded-c2d61c2ab569	1436	0	1433	TRINITY_DN2150_c30_g1_i1	2512	662	2464	1424	9	-	3	93,771,569,	3,96,867,	662,756,1895,
HS_104:387|12c77c0d-0459-4fcf-a1eb-f24a8a44c9d8	286	0	286	TRINITY_DN8090_c0_g4_i1	1139	638	1102	285	1	+	3	137,144,5,	0,137,281,	638,776,1097,
HS_101:1442|e650b959-b852-4374-b98e-abbcc5865787	1345	3	1343	TRINITY_DN5971_c0_g1_i2	3364	1891	3277	1333	2	-	3	192,1051,92,	2,194,1250,	1891,2134,3185,
HS_102:642|ba92dc78-c6bc-4eaf-abe4-5051b60a1b16	543	0	540	TRINITY_DN29184_c0_g1_i4	4598	194	733	539	0	-	2	10,529,	3,14,	194,204,
HS_96:2054|9f5f174f-c180-4b0b-970b-a9276cfb4f55	2010	3	2005	TRINITY_DN4279_c0_g1_i4	2179	6	2008	1998	4	-	1	2002,	5,	6,
HS_98:514|8b239334-d0ba-46f0-84ad-0117df18fcad	414	0	413	TRINITY_DN24894_c0_g1_i1	1241	49	464	411	1	+	4	22,22,5,363,	0,22,45,50,	49,72,94,101,
HS_99:835|cf71def0-8d05-4f6e-a80f-ca6564f2f13b	731	0	731	TRINITY_DN365_c1_g1_i5	2757	1941	2672	724	7	-	1	731,	0,	1941,
HS_85:3288|23f448ad-9447-4eaf-87ac-eb8f46a43a0e	3228	12	3216	TRINITY_DN8942_c0_g1_i1	3519	173	3519	3204	0	-	2	3170,34,	12,3182,	173,3485,
HS_102:3747|70a0e4fc-f1a1-4f49-93e8-56c852418cf7	3722	1	3722	TRINITY_DN8500_c0_g1_i9	4619	209	4475	3720	1	+	5	822,1819,98,977,5,	1,823,2642,2740,3717,	209,1088,3095,3426,4470,
HS_109:562|90bb4395-52ec-4724-a05e-b211b9a6f926	457	0	457	TRINITY_DN12739_c0_g1_i3	1467	18	486	455	1	-	4	20,168,7,261,	0,21,189,196,	18,47,216,225,
HS_102:1195|45eb5154-f5ea-4ad9-b0ac-8e15aede4a04	1097	0	1094	TRINITY_DN5895_c0_g1_i19	4761	110	4559	1088	6	-	6	266,50,261,157,239,121,	3,269,319,580,737,976,	110,1462,1971,2409,3826,4438,
HS_111:1576|6fc33be7-3802-4d64-a754-6c8bb0a25fa6	1486	3	1482	TRINITY_DN55954_c0_g2_i4	2354	76	2248	1473	6	+	4	9,605,809,56,	3,12,617,1426,	76,87,1382,2192,
HS_68:1355|61b9ddd1-e2bb-4f94-9b6a-87cebcb284bf	1313	0	1313	TRINITY_DN9693_c6_g1_i1	1920	434	1755	1308	1	+	6	497,638,32,32,29,81,	0,497,1137,1170,1203,1232,	434,932,1570,1605,1643,1674,
HS_91:831|d2222fa0-510b-4a0d-9612-c975f95b0935	748	3	746	TRINITY_DN10402_c0_g1_i2	2116	26	861	742	1	+	2	374,369,	3,377,	26,492,
HS_108:1848|a7023ec0-8560-4199-a9c9-b641949c494d	1765	1	1759	TRINITY_DN3168_c0_g1_i5	1904	36	1794	1757	1	-	1	1758,	6,	36,
HS_88:541|bca9fc7a-738e-4d79-abaa-1e3c934309e1	464	0	464	TRINITY_DN16320_c0_g1_i2	943	249	722	460	2	-	5	80,30,121,153,78,	0,80,110,233,386,	249,330,366,490,644,
HS_87:683|26bdd720-ca4c-4c49-b544-056638df8711	608	0	603	TRINITY_DN2905_c0_g1_i6	1845	287	1775	603	0	+	3	154,329,120,	0,154,483,	287,444,1655,
HS_104:548|9b908ae4-8ba3-46dc-b1df-0a44a93a37ee	459	0	459	TRINITY_DN14602_c1_g1_i2	1525	0	580	459	0	-	2	18,441,	0,18,	0,139,
HS_98:333|2db6e0e8-eb10-4525-98e1-e1fa1bf77b4c	242	0	242	TRINITY_DN1875_c0_g3_i1	2962	1159	1432	242	0	-	3	12,13,217,	0,12,25,	1159,1198,1215,
HS_105:992|3a7b1022-0f8d-4f11-84ff-200e177160a4	909	3	909	TRINITY_DN2679_c1_g1_i4	1679	74	1562	900	2	-	5	536,235,84,4,43,	0,536,771,857,863,	74,709,1431,1515,1519,
HS_95:1267|7b8f2eab-103c-4c76-a904-8edcd22cfda4	1190	2	1189	TRINITY_DN5911_c0_g1_i1	1680	194	1517	1183	4	-	2	433,754,	1,434,	194,763,
HS_109:725|0431c1dd-e8f4-4bfb-a143-eec723001e42	620	0	620	TRINITY_DN6219_c0_g2_i1	2019	39	661	614	5	-	5	81,56,108,248,126,	0,82,138,246,494,	39,120,177,286,535,
HS_84:1751|387dd3e1-b386-4286-bbcc-ac5539ac3f2c	1681	0	1671	TRINITY_DN26453_c0_g1_i9	2237	48	1763	1668	3	+	3	5,667,999,	0,5,672,	48,80,764,
HS_92:554|5121623c-ee64-4160-8cde-ee28e32054c7	461	0	461	TRINITY_DN29928_c0_g1_i1	1344	516	980	460	1	-	3	16,20,425,	0,16,36,	516,534,555,
HS_90:358|e94e224b-6e6c-4d54-8380-ce1166e56655	273	0	273	TRINITY_DN3576_c1_g1_i6	1351	193	524	271	2	-	2	27,246,	0,27,	193,278,
HS_98:1883|f0a5c1de-5b85-4937-934b-1732f4ac686e	1795	0	1795	TRINITY_DN1162_c0_g1_i4	5886	143	2037	1786	0	+	4	154,6,153,1473,	0,154,163,322,	143,398,411,564,
HS_94:1105|f35046f2-7776-43a3-977e-cfd59c1d592b	1015	0	1014	TRINITY_DN25303_c0_g1_i6	2105	625	1810	1011	3	-	2	404,610,	1,405,	625,1200,
HS_91:1391|e2a5ff18-1c45-4759-8ff1-12d6729b55c2	1331	0	1331	TRINITY_DN17852_c0_g1_i7	6934	3393	6794	1321	10	+	3	250,61,1020,	0,250,311,	3393,4301,5774,
HS_92:551|33aa86ba-610e-40c2-a0ce-de687ae6055a	462	0	462	TRINITY_DN6933_c3_g2_i1	1022	309	823	459	3	-	2	6,456,	0,6,	309,367,
HS_102:456|86845915-310c-4524-9074-eeb54ef622a6	355	0	355	TRINITY_DN129167_c0_g1_i1	1194	835	1188	352	1	+	3	344,5,4,	0,345,351,	835,1179,1184,
HS_107:4747|8beafcd1-677c-463b-a6b8-56fc19f2ba66	4668	0	4667	TRINITY_DN2850_c0_g1_i7	5372	469	5227	4645	20	+	7	286,159,984,1087,1917,104,128,	0,288,447,1431,2518,4435,4539,	469,756,920,1907,3076,4994,5099,
HS_89:2393|aab464f0-d02b-458b-ad42-64a10ad4a1e6	2221	0	2221	TRINITY_DN6781_c0_g1_i6	2342	109	2320	2205	6	+	4	2171,12,12,16,	0,2172,2190,2205,	109,2280,2292,2304,
HS_99:823|ff25d0bd-82e8-4880-8023-3707c9d8d791	724	0	724	TRINITY_DN365_c1_g1_i5	2757	1948	2672	717	7	-	1	724,	0,	1948,
HS_87:814|9abd070c-9101-42b3-8c92-e436d79137ca	735	5	734	TRINITY_DN10395_c0_g1_i3	1401	32	763	728	1	+	3	4,673,52,	5,9,682,	32,37,711,
HS_91:2080|529175d9-cae6-4aa5-9b82-e6ba8e9ca62b	1991	0	1990	TRINITY_DN8512_c0_g1_i2	2358	96	2085	1988	1	+	2	4,1985,	0,5,	96,100,
HS_101:690|9864a972-3beb-4530-89d4-a9cce772e75b	592	0	592	TRINITY_DN2239_c0_g1_i6	1940	0	1339	591	1	-	3	6,135,451,	0,6,141,	0,26,888,
HS_101:1411|07eeadb9-cb70-473e-8887-a36805fdda5c	1313	3	1311	TRINITY_DN2246_c0_g1_i2	1858	219	1583	1308	0	+	2	1091,217,	3,1094,	219,1366,
HS_408:634|ad6138c2-6b0c-4982-a589-560bd2126dd9	226	0	226	TRINITY_DN52029_c0_g1_i1	397	98	327	224	0	-	4	64,36,14,110,	0,65,101,116,	98,164,201,217,
HS_97:2281|71102846-928f-47e8-a7f9-3c6b2d45779f	2189	3	2189	TRINITY_DN14153_c0_g1_i1	2625	151	2532	2185	1	+	2	939,1247,	3,942,	151,1285,
HS_105:3031|31c25dcc-3c52-4013-b04f-b721acf507bf	2934	1	2917	TRINITY_DN44_c0_g2_i1	3096	0	2919	2914	2	-	2	1199,1717,	17,1216,	0,1202,
HS_84:377|84c6ac18-ba38-4f9e-9bd5-c2bad9a8ab28	293	0	293	TRINITY_DN287_c6_g1_i8	2694	1917	2540	291	0	-	7	7,79,32,43,109,17,4,	0,7,86,119,162,272,289,	1917,2252,2332,2364,2409,2518,2536,
HS_101:1159|6de1d5aa-7ac9-44b4-b0bb-ab965b69bf8d	1069	0	1062	TRINITY_DN3878_c0_g1_i26	2374	428	2220	1060	1	+	3	679,301,81,	0,679,981,	428,1838,2139,
HS_103:1079|a7af449a-938b-44d7-959a-d7567d58a9d0	980	0	980	TRINITY_DN4405_c0_g1_i1	2461	19	1668	979	1	-	2	658,322,	0,658,	19,1346,
HS_96:2580|ac9ca7d1-dc52-4c69-a859-49fb88c22645	2516	4	2510	TRINITY_DN3950_c0_g1_i2	3806	1151	3722	2498	8	+	2	1716,790,	4,1720,	1151,2932,
HS_94:1855|c4449c79-6b67-4d3f-ac95-207cc16b48e2	1776	3	1776	TRINITY_DN5923_c0_g1_i4	1786	0	1786	1768	3	-	5	9,5,16,38,1703,	0,9,14,31,70,	0,21,29,45,83,
HS_82:794|d7f60037-39d1-4e19-92ba-f9c32bd15a4a	720	0	720	TRINITY_DN3681_c0_g3_i2	3078	19	750	718	2	-	2	46,674,	0,46,	19,76,
HS_104:2812|39291598-84c7-49d8-abf2-4c651d9a7e41	2718	3	2706	TRINITY_DN1439_c4_g1_i1	4823	555	3367	2692	4	+	6	11,803,1789,57,16,20,	3,16,819,2609,2670,2686,	555,566,1478,3267,3330,3347,
HS_110:3411|eb177119-bd67-4f4d-a0b1-ad5a1e57f01b	3329	5	3322	TRINITY_DN1707_c0_g1_i4	3987	0	3962	3302	12	+	5	39,253,2279,720,23,	5,44,297,2576,3299,	0,106,360,3219,3939,
HS_88:1536|48f396e1-4c92-4604-9445-05c7701cc907	1463	0	1460	TRINITY_DN4956_c0_g1_i1	2211	474	2161	1456	4	-	5	582,11,40,68,759,	3,585,596,636,704,	474,1117,1129,1172,1402,
HS_89:1984|090aff90-df97-4513-abf3-eaf49796a0ad	1905	0	1898	TRINITY_DN21440_c0_g1_i3	2186	230	2130	1886	12	+	3	380,1483,35,	0,380,1863,	230,611,2095,
HS_87:2063|fa59585e-5668-4799-9f7b-ac46361bddae	1978	0	1978	TRINITY_DN16056_c0_g1_i10	5147	57	2088	1973	1	+	7	123,21,74,53,10,1273,420,	0,123,145,220,274,285,1558,	57,181,202,276,329,339,1668,
HS_103:1319|4555b7e6-dd88-42f0-8e55-ce1867101283	1216	0	1209	TRINITY_DN28182_c0_g1_i27	1389	39	1342	1205	4	-	4	248,679,9,273,	7,255,934,943,	39,289,1058,1069,
HS_102:1866|2615275e-21f1-4cd3-8c31-a89df3e3fba9	1751	2	1747	TRINITY_DN7340_c0_g1_i2	2070	109	2034	1743	2	-	3	1107,463,175,	4,1111,1574,	109,1250,1859,
HS_98:2012|118607b2-e387-43e5-a60b-e26e1b6c4ba7	1919	0	1919	TRINITY_DN8182_c0_g1_i5	4828	236	4744	1915	4	+	2	1576,343,	0,1576,	236,4401,
HS_93:418|fab3e9e8-c76f-475a-9b28-8589245f51cd	329	0	329	TRINITY_DN550_c3_g1_i4	1317	902	1310	326	3	+	2	313,16,	0,313,	902,1294,
HS_99:1067|8c822fa4-352e-4ae0-b890-d4354cd5a2f6	972	0	972	TRINITY_DN912_c0_g1_i1	1290	15	998	970	2	+	2	960,12,	0,960,	15,986,
HS_101:1679|1e90563d-b028-4902-bb8a-93858346cbbb	1590	6	1590	TRINITY_DN3050_c0_g1_i28	6598	4870	6559	1580	3	-	4	293,6,1247,37,	0,293,299,1547,	4870,5168,5275,6522,
HS_89:413|c0990d2a-a62b-4304-b3ae-7a4c5722d962	320	0	320	TRINITY_DN9939_c0_g1_i1	1870	48	1108	319	1	+	3	60,253,7,	0,60,313,	48,628,1101,
HS_88:1043|4c20c7e8-586a-4742-9435-b9e85d005656	970	0	970	TRINITY_DN6762_c0_g1_i3	2220	199	1232	961	4	-	2	434,531,	0,439,	199,701,
HS_91:413|43fde07e-9084-460f-868e-f4dbc6097b28	329	0	329	TRINITY_DN14610_c0_g1_i1	2840	2444	2836	326	2	+	4	304,6,10,8,	0,304,311,321,	2444,2753,2759,2828,
HS_110:1319|d2f1277c-56ff-4691-b5b8-8b164763ba31	1213	3	1211	TRINITY_DN2668_c0_g1_i8	2140	85	2064	1208	0	+	2	133,1075,	3,136,	85,989,
HS_108:1709|38c4dd82-d758-4d0e-9719-945524d5a0df	1603	2	1603	TRINITY_DN7136_c0_g1_i1	4407	2710	4311	1589	6	-	3	845,117,633,	0,851,968,	2710,3555,3678,
HS_105:513|c9e7cbe7-ac31-4a8b-898b-146fbae28152	411	0	411	TRINITY_DN16236_c0_g1_i2	1266	185	746	407	4	+	2	228,183,	0,228,	185,563,
HS_104:594|fb1c8633-cd3c-46a4-a4c7-3002a48793c5	491	0	491	TRINITY_DN550_c3_g1_i4	1317	551	1305	487	4	+	3	90,390,11,	0,90,480,	551,880,1294,
HS_93:2470|ae73b846-ef9b-48da-a1bf-6d3393bff3db	2395	0	2394	TRINITY_DN4204_c0_g1_i4	3037	436	2830	2392	2	-	1	2394,	1,	436,
HS_92:350|f5d60ee8-f25c-430d-8a5f-a30c7a7a500b	259	0	259	TRINITY_DN458_c0_g1_i13	2826	979	1319	259	0	+	2	253,6,	0,253,	979,1313,
HS_88:1883|56d25483-5ca7-4520-a2dd-9cac4cb0057a	1846	4	1842	TRINITY_DN6821_c0_g1_i8	2154	147	2154	1830	7	-	3	105,5,1727,	4,109,115,	147,422,427,
HS_96:1323|7bc99822-bc67-417c-8723-5ec10d6879d7	1255	0	1255	TRINITY_DN8329_c0_g1_i2	1999	6	1287	1244	1	+	2	844,401,	0,854,	6,886,
HS_94:2597|1e8d3580-1d30-435f-8e60-43111b1ed68e	2521	0	2521	TRINITY_DN5577_c0_g1_i2	2581	59	2577	2504	10	+	4	442,1835,103,134,	0,442,2284,2387,	59,504,2339,2443,
HS_105:3648|62c95fb1-7083-46d6-938d-23b7c4a38202	3552	3	3552	TRINITY_DN61689_c0_g1_i4	7318	107	3662	3547	1	+	2	3541,7,	3,3545,	107,3655,
HS_100:1371|4521a32f-36d0-491d-b6ef-c9547c92e78f	1266	3	1266	TRINITY_DN3599_c0_g1_i42	2255	928	2236	1263	0	-	3	25,916,322,	0,25,941,	928,954,1914,
HS_90:1121|8965239c-7707-445d-bcf1-cc4257a211a3	1045	0	1042	TRINITY_DN1452_c2_g2_i1	1206	90	1132	1041	1	-	1	1042,	3,	90,
HS_89:358|29a9492f-89cc-48f6-92de-7bd341b68bd5	268	0	268	TRINITY_DN5394_c0_g1_i3	3973	3309	3778	268	0	+	2	262,6,	0,262,	3309,3772,
HS_103:335|2f8a4488-e7d1-4158-a8c0-f940ca1e5222	232	0	232	TRINITY_DN550_c10_g1_i2	2395	116	354	231	1	-	6	70,52,6,93,7,4,	0,70,122,128,221,228,	116,188,241,248,342,350,
HS_102:481|44c45863-89f0-4934-96df-37db5068f61f	377	0	377	TRINITY_DN8025_c0_g1_i1	830	0	534	374	1	+	5	281,5,7,75,7,	0,282,287,295,370,	0,281,289,296,527,
HS_97:421|550d999a-b4e4-42de-9ee4-e1837fbb324d	330	0	330	TRINITY_DN60667_c0_g1_i1	959	483	817	329	1	+	4	132,125,45,28,	0,132,257,302,	483,616,743,789,
HS_102:411|3eeea4ae-c0ed-4e84-86f9-e8bb77b44869	312	0	309	TRINITY_DN1669_c1_g1_i2	3515	3169	3497	309	0	+	2	98,211,	0,98,	3169,3286,
HS_103:2252|3fd78a24-3bf5-4ffe-90ba-1034bf8296f2	2164	3	2163	TRINITY_DN22091_c0_g1_i2	2452	224	2384	2158	2	-	1	2160,	1,	224,
HS_110:393|1d529775-246a-4270-b1b7-a3309a1ab648	283	0	283	TRINITY_DN5099_c0_g1_i3	3577	599	3449	281	2	+	3	240,38,5,	0,240,278,	599,3264,3444,
HS_101:1114|814033b1-c39b-48c3-81bf-105be863d684	1021	2	1018	TRINITY_DN3211_c0_g2_i4	1821	211	1595	1016	0	-	3	783,134,99,	3,786,920,	211,1119,1496,
HS_111:967|30c4c400-1ef5-4a2c-b8c2-bf2dbaab62ef	861	0	855	TRINITY_DN4632_c0_g1_i1	2282	1185	2219	854	1	+	2	788,67,	0,788,	1185,2152,
HS_90:2601|91a7e920-cc9f-4f0c-91a6-419e5b6e7835	2519	2	2515	TRINITY_DN408_c0_g2_i5	3391	785	3298	2509	4	-	1	2513,	4,	785,
HS_103:2042|1836fd88-b81f-42da-9cac-4bc9308ad2f4	1961	4	1961	TRINITY_DN3197_c1_g1_i1	1993	20	1990	1944	11	+	3	140,34,1781,	4,146,180,	20,160,209,
HS_100:1288|b63bf46f-5c5c-453d-8e16-cd13cb860767	1198	1	1198	TRINITY_DN1452_c0_g1_i7	1399	46	1264	1191	6	-	4	495,677,9,16,	0,495,1172,1181,	46,560,1238,1248,
HS_87:806|0bf83161-fd31-4283-96a5-f5aefac69e90	717	0	717	TRINITY_DN6933_c2_g1_i1	1799	800	1519	710	7	-	2	502,215,	0,502,	800,1304,
HS_87:6404|e5df39b9-587e-4353-aa35-eff9f2d2b6bd	6439	0	6439	TRINITY_DN3623_c0_g1_i6	7068	27	7065	6431	1	+	6	3735,207,2455,9,20,6,	0,3735,3942,6400,6413,6433,	27,3842,4536,6993,7008,7059,
HS_104:2220|b2a8b6ce-6348-4bc5-b2ca-ff2219f382ce	2112	1	2110	TRINITY_DN4202_c2_g1_i6	4931	66	4641	2103	4	-	7	1014,69,574,99,63,197,91,	2,1016,1085,1659,1758,1822,2020,	66,2536,3615,4190,4290,4353,4550,
HS_92:2494|65172d00-c7f5-4a4e-813e-8dd348a7fa49	2381	0	2381	TRINITY_DN10373_c1_g1_i4	2493	95	2479	2373	5	-	6	1438,54,112,107,483,184,	0,1439,1494,1606,1713,2197,	95,1533,1591,1704,1812,2295,
HS_106:1315|41532a4c-8f3a-40b7-bc9a-57e955f62fa4	1215	1	1214	TRINITY_DN2684_c0_g1_i1	2627	1372	2601	1203	8	-	5	37,6,57,877,234,	1,38,46,103,980,	1372,1410,1421,1481,2367,
HS_96:397|337682e5-4dd6-406d-b5c6-6345aac0d4b5	299	0	299	TRINITY_DN13749_c0_g1_i1	1851	330	726	299	0	+	2	293,6,	0,293,	330,720,
HS_103:399|794b1d87-c046-4a26-b068-2655fd12187b	297	0	297	TRINITY_DN39914_c0_g3_i3	3047	101	402	295	1	+	7	131,18,23,8,6,17,93,	0,131,149,173,181,187,204,	101,233,252,275,284,291,309,
HS_89:333|0287926e-b8b8-4437-9ed2-52cb614409fb	244	0	244	TRINITY_DN4635_c1_g2_i1	823	6	456	242	0	-	3	6,51,185,	0,6,59,	6,220,271,
HS_89:351|e4c7a143-b56b-4267-b219-d5b882b29f24	266	0	266	TRINITY_DN11551_c0_g1_i2	1282	999	1263	264	0	+	3	23,184,57,	0,24,209,	999,1022,1206,
HS_87:1569|8b288a87-0508-43ea-8b52-f4c84d5ab87b	1471	1	1463	TRINITY_DN4595_c0_g1_i6	2804	936	2737	1458	3	+	4	405,152,883,21,	1,406,558,1442,	936,1680,1833,2716,
HS_100:1288|ee8e4034-4ca2-4523-ba71-34b1a32e8267	1188	0	1187	TRINITY_DN365_c1_g1_i5	2757	1487	2674	1178	9	-	1	1187,	1,	1487,
HS_86:616|1fc99323-c315-4f4a-bfe8-cb9370677546	537	0	536	TRINITY_DN5138_c1_g1_i5	796	120	758	533	1	-	6	271,204,7,29,9,14,	1,272,477,485,514,523,	120,491,695,702,734,744,
HS_95:418|63d401e7-5ee1-4a81-93d2-aaac499eb1f7	327	0	327	TRINITY_DN8305_c0_g1_i1	959	40	405	324	3	-	3	7,315,5,	0,7,322,	40,48,400,
HS_99:2866|e7a53d6b-56f6-4eb3-964f-58a56cb8d792	2870	2	2870	TRINITY_DN1612_c0_g1_i24	4570	173	4042	2845	22	+	6	250,14,369,223,1913,98,	2,253,267,636,859,2772,	173,423,441,1680,2029,3944,
HS_95:1498|dcfa13b9-fb72-4aa0-8417-6be8ea5f3c07	1401	0	1392	TRINITY_DN1893_c0_g3_i2	1884	7	1403	1387	2	-	5	33,13,35,72,1236,	9,42,56,92,165,	7,41,54,92,167,
HS_98:741|218fff34-7892-47cd-8ba2-217367f29412	643	2	642	TRINITY_DN17389_c0_g1_i4	2470	1699	2339	637	3	+	1	640,	2,	1699,
HS_102:483|12acc16b-38f9-4e6c-b0bc-644f795b25b0	392	0	389	TRINITY_DN3262_c2_g1_i2	2481	1662	2259	389	0	+	5	151,27,23,98,90,	0,151,178,201,299,	1662,1814,2045,2070,2169,
HS_103:1305|dcb7e8d9-d35b-4773-a3ef-efcf0e84e2ec	1208	1	1208	TRINITY_DN10258_c2_g1_i2	1355	49	1256	1196	11	+	1	1207,	1,	49,
HS_90:1913|7b3ca5b4-b032-4eec-a687-5ab44ff2902a	1837	0	1837	TRINITY_DN3285_c1_g1_i3	3612	314	2342	1833	4	+	2	1786,51,	0,1786,	314,2291,
HS_91:2226|93fb0787-cb3c-4e5f-ab0e-89ecc9ebe018	2145	0	2141	TRINITY_DN17630_c0_g1_i4	2870	56	2197	2124	15	+	5	1140,794,41,7,157,	0,1141,1935,1976,1984,	56,1196,1991,2033,2040,
HS_107:421|96bc78e4-c978-4764-bf03-ea98ff5f4583	320	0	320	TRINITY_DN2835_c4_g1_i1	662	130	497	320	0	+	2	314,6,	0,314,	130,491,
HS_89:783|cc7fb2fa-0ace-42aa-94a7-08e9de9eaac0	693	1	692	TRINITY_DN34348_c0_g1_i1	2479	0	692	691	0	+	2	57,634,	1,58,	0,58,
HS_91:1030|08326adb-b6c1-42f6-8bad-aa0063ec730c	945	1	941	TRINITY_DN329_c1_g1_i1	1180	103	1045	936	4	+	2	865,75,	1,866,	103,970,
HS_90:1817|2ef50bf9-d2a9-464e-8d57-00cec1a2a46f	1739	0	1739	TRINITY_DN3995_c0_g1_i3	2112	109	1857	1724	7	+	13	247,50,34,48,31,49,171,36,163,28,13,10,851,	0,248,298,333,381,412,461,632,668,835,864,878,888,	109,356,409,443,492,524,575,748,786,954,982,995,1006,
HS_102:721|ee209195-e8df-4cfc-9a47-2b07fab77e64	625	4	625	TRINITY_DN10381_c0_g1_i1	785	81	702	619	2	+	1	621,	4,	81,
HS_101:788|e45025a5-30d0-4065-9c4d-35372da401b6	692	0	692	TRINITY_DN71919_c0_g1_i1	2292	1569	2262	691	1	-	2	470,222,	0,470,	1569,2040,
HS_99:3095|d2a91c55-245b-4012-941d-ac898420b8f6	3007	11	3007	TRINITY_DN25887_c0_g1_i8	3256	7	3256	2989	6	-	6	1475,144,894,280,133,69,	0,1475,1619,2513,2794,2927,	7,1656,1878,2773,3053,3187,
HS_82:1363|36bf67df-8207-4b65-8749-e71bcbdc32ec	1297	0	1288	TRINITY_DN6308_c0_g2_i1	1633	0	1374	1285	2	-	4	30,747,435,75,	9,39,786,1222,	0,47,864,1299,
HS_103:2956|349cdb68-eb55-4c89-903a-f7c34450f218	2870	2	2869	TRINITY_DN12957_c0_g1_i14	3156	53	2922	2848	7	+	3	708,18,2129,	2,721,740,	53,775,793,
HS_91:819|f9714bb3-4bac-47a1-9c72-d27e9d2fce6b	744	0	740	TRINITY_DN1806_c0_g1_i11	3571	2576	3426	738	2	+	3	54,579,107,	0,54,633,	2576,2737,3319,
HS_97:491|48a9cc36-aeb4-48c7-ae12-7c290e60705a	392	0	392	TRINITY_DN27426_c0_g2_i1	698	253	651	391	1	-	3	11,46,335,	0,11,57,	253,266,316,
HS_100:1520|49c9ee0d-3e07-4e26-a9e9-fe7429eabf73	1436	2	1436	TRINITY_DN6080_c0_g1_i21	5268	159	2677	1426	8	+	3	301,1126,7,	2,303,1429,	159,1119,2670,
HS_92:1053|16d0c823-6238-4494-8fcf-bac2793fab50	968	0	967	TRINITY_DN9661_c0_g1_i7	2522	89	2421	965	2	+	4	531,214,191,31,	0,531,745,936,	89,1387,1957,2390,
HS_96:1733|050185ec-2144-412c-bfa9-e4c40ad04c8d	1653	0	1653	TRINITY_DN1184_c0_g1_i1	2356	47	2261	1651	1	+	4	409,7,4,1232,	0,409,416,421,	47,1017,1025,1029,
HS_104:1024|5a838c73-8980-4165-a17e-c6e0eaa9f07e	914	1	912	TRINITY_DN23850_c0_g1_i4	2591	651	1563	910	1	-	2	51,860,	2,53,	651,703,
HS_106:638|8cc64407-2b09-4491-8906-7e96dd0d733a	542	1	542	TRINITY_DN8492_c0_g1_i18	2256	478	1147	540	1	+	2	394,147,	1,395,	478,1000,
HS_96:1303|c9dcb236-faa1-4151-b9e7-563c068ab9c1	1224	0	1224	TRINITY_DN103_c1_g1_i23	2140	712	1937	1223	1	-	2	416,808,	0,416,	712,1129,
HS_90:1779|6c8fb85b-1d81-4244-b5b5-6bbee8edb8c8	1703	0	1701	TRINITY_DN3683_c0_g1_i4	3294	801	3046	1697	4	+	2	1175,526,	0,1175,	801,2520,
HS_90:370|09e5ae3a-54c0-4e9d-8eaf-051aeff27f33	281	0	280	TRINITY_DN10585_c0_g1_i3	3378	1108	1394	279	1	+	6	20,32,77,46,21,84,	0,20,52,129,175,196,	1108,1129,1162,1240,1288,1310,
HS_90:370|5573c842-61e2-4d2c-bf41-875a756cc80f	283	0	281	TRINITY_DN4688_c0_g1_i2	402	49	331	281	0	+	2	47,234,	0,47,	49,97,
HS_97:624|6f032058-8509-462e-8ad3-19b38343c29d	537	0	535	TRINITY_DN795_c0_g1_i4	2867	1407	2733	535	0	+	4	243,77,129,86,	0,243,320,449,	1407,2040,2214,2647,
HS_88:2925|578eb142-4cf9-4fcb-91fd-470ca9b838cd	2850	12	2846	TRINITY_DN29513_c0_g1_i4	3110	22	2873	2823	9	+	6	2439,265,29,43,23,33,	12,2451,2717,2746,2790,2813,	22,2463,2728,2758,2811,2840,
HS_94:1362|b0d3dbea-d6d2-4807-82ca-b0b25d8ab297	1283	1	1283	TRINITY_DN2746_c0_g2_i2	1635	4	1459	1273	9	+	2	1277,5,	1,1278,	4,1454,
HS_105:645|53223504-e042-423e-b2d3-e51aad4810fb	540	0	540	TRINITY_DN32492_c0_g2_i1	2114	1433	1981	538	2	+	5	314,177,11,11,27,	0,314,491,502,513,	1433,1750,1930,1942,1954,
HS_85:3209|11ba1eab-4aea-407c-ad68-91a77c170714	3173	1	3173	TRINITY_DN147_c0_g1_i4	3448	4	3448	3166	6	-	4	340,246,2559,27,	0,340,586,3145,	4,358,861,3421,
HS_104:634|9aca8a5a-cfff-4eff-8789-c559b41269e3	532	1	532	TRINITY_DN1321_c0_g2_i1	1569	7	648	527	4	-	2	428,103,	0,428,	7,545,
HS_102:477|a2520f2c-e772-421e-9bcf-b6afb803a689	381	0	381	TRINITY_DN26398_c0_g2_i6	2630	98	614	381	0	-	3	6,370,5,	0,6,376,	98,141,609,
HS_104:2620|7406d987-e207-4fd1-a1b1-33c126cad684	2524	1	2510	TRINITY_DN38794_c0_g1_i5	3557	134	3523	2507	0	+	4	314,662,1519,12,	1,315,977,2498,	134,593,1989,3511,
HS_111:959|7e4b23d4-8f8c-4d0e-be16-0b6ecf7bdcf8	873	0	873	TRINITY_DN2604_c0_g1_i8	1361	279	1152	865	8	+	1	873,	0,	279,
HS_98:698|7b67b795-a233-44c3-a9e8-a0f4de963ec7	600	0	600	TRINITY_DN8582_c0_g1_i2	2253	663	2245	599	0	+	2	198,401,	0,199,	663,1844,
HS_99:4924|6ad31c41-7108-40dc-a305-3a0ca2993c11	4855	14	4855	TRINITY_DN3623_c0_g1_i6	7068	0	4834	4834	0	+	3	3762,805,267,	14,3782,4588,	0,3762,4567,
HS_90:374|8d9fa93d-6da3-4ba9-bd54-3894645d1fb6	285	0	285	TRINITY_DN39914_c0_g3_i3	3047	104	393	283	0	+	5	26,135,12,20,90,	0,28,163,175,195,	104,130,269,282,303,
HS_105:1281|f21683b0-80a5-490b-bf27-1a7af1384598	1181	0	1181	TRINITY_DN1286_c0_g1_i3	1821	593	1801	1173	8	+	3	652,386,143,	0,652,1038,	593,1271,1658,
HS_80:631|c5b62298-6875-4137-b8ef-19658308cb0e	552	0	550	TRINITY_DN2150_c5_g1_i1	1917	39	626	547	3	+	2	13,537,	0,13,	39,89,
HS_84:2535|13b75c79-2eae-41ef-ab56-13a7d242ed87	2491	0	2491	TRINITY_DN3779_c0_g2_i1	2784	168	2691	2481	8	-	5	5,745,1288,40,411,	0,5,750,2039,2080,	168,182,952,2240,2280,
HS_104:1020|4391957f-079a-424c-b0a7-3d14ea1609f4	932	6	932	TRINITY_DN487_c1_g1_i1	1717	678	1604	925	1	-	1	926,	0,	678,
HS_91:412|fc5e8295-8275-47ef-b1f0-b4ad4f0ca767	321	0	321	TRINITY_DN65611_c0_g1_i1	452	42	366	319	1	-	5	43,30,27,66,154,	0,43,73,100,167,	42,87,118,146,212,
HS_41:3573|c4b4d6df-021c-458c-ba58-f61ddef57fc0	3559	4	3553	TRINITY_DN9320_c0_g1_i1	3871	78	3627	3547	2	+	1	3549,	4,	78,
HS_91:547|a4e04289-1775-46ad-8251-3e469e5fe77a	478	0	478	TRINITY_DN12863_c0_g1_i12	1584	847	1496	475	3	+	2	6,472,	0,6,	847,1024,
HS_99:1585|d816c6e5-ed3d-492f-bbc6-c1c96c7dd777	1502	0	1502	TRINITY_DN3626_c0_g1_i8	2771	61	1563	1487	15	-	1	1502,	0,	61,
HS_107:1013|87bc3b9e-2afc-415d-b778-871def6109a9	906	0	906	TRINITY_DN85004_c0_g1_i1	2010	596	1505	897	2	-	5	44,693,16,94,52,	0,45,744,760,854,	596,640,1340,1358,1453,
HS_88:3487|86f18c7a-b893-43f6-ae18-8cd540cb4bc7	3431	0	3431	TRINITY_DN1196_c1_g2_i7	5693	1054	4650	3427	1	-	5	21,34,841,2415,117,	0,23,57,899,3314,	1054,1075,1110,1951,4533,
HS_90:1385|f861d774-5e66-4fd2-a2c3-0a7b681ec91e	1308	0	1308	TRINITY_DN3285_c1_g1_i3	3612	1001	2593	1302	2	+	3	555,744,5,	0,559,1303,	1001,1590,2588,
HS_99:1159|8d77c618-b0c9-4ccb-a231-5dc16728b4d6	1075	3	1072	TRINITY_DN227_c3_g1_i1	3104	36	3074	1069	0	-	2	139,930,	3,142,	36,2144,
HS_99:2501|c79fbf48-2b76-4a86-92f1-87a88738f347	2416	2	2416	TRINITY_DN5463_c1_g1_i6	2956	415	2831	2413	1	+	3	1085,33,1296,	2,1087,1120,	415,1501,1535,
HS_96:340|4135667e-6ac3-47c6-ae59-f20938fd203f	247	0	247	TRINITY_DN2564_c0_g2_i1	800	223	790	245	1	+	2	24,222,	0,25,	223,568,
HS_90:2973|3d90ba1a-ad7d-4a51-b6e5-2b1147994d4c	2881	1	2877	TRINITY_DN4057_c2_g1_i3	3373	250	3176	2873	1	+	3	10,354,2510,	1,13,367,	250,261,666,
HS_64:486|51f11d4b-77c0-4c69-9e8c-e2108dbef3bb	420	0	420	TRINITY_DN550_c3_g1_i4	1317	562	1266	416	4	+	3	82,3,335,	0,82,85,	562,685,931,
HS_98:506|53406255-00a4-4d7c-bd3f-847f601dc211	420	0	419	TRINITY_DN13387_c0_g1_i7	1490	504	1139	416	3	-	2	156,263,	1,157,	504,876,
HS_100:2786|9063b0f9-a3d0-48ec-8eca-aed8123aaa58	2707	5	2701	TRINITY_DN825_c0_g1_i18	3522	63	3517	2684	11	+	6	19,512,677,863,324,300,	5,24,537,1214,2077,2401,	63,83,595,1326,2890,3217,
HS_96:394|2a379946-c4f6-487c-aab3-df8819852137	298	0	298	TRINITY_DN39914_c0_g3_i3	3047	103	446	298	0	+	3	179,114,5,	0,179,293,	103,283,441,
HS_85:2623|d52742bc-2426-4921-ac60-75678ad09853	2571	0	2571	TRINITY_DN1114_c1_g1_i19	4587	1559	4201	2565	0	+	4	1106,9,1445,5,	0,1106,1121,2566,	1559,2710,2723,4196,
HS_105:1341|387de48f-2c55-473d-b55a-7c54b673e909	1259	2	1259	TRINITY_DN1067_c2_g3_i4	1417	35	1358	1251	5	-	6	45,37,285,423,190,276,	0,45,82,367,791,981,	35,81,119,463,889,1082,
HS_107:3937|7255a4ad-cd21-4be1-b049-abaab0ae3e4f	3860	6	3858	TRINITY_DN4198_c0_g1_i2	3938	27	3938	3852	0	-	2	3717,135,	2,3719,	27,3803,
HS_101:1883|39a0c7f6-b259-4180-bde1-922a485cbfc6	1793	2	1789	TRINITY_DN8456_c0_g1_i6	1821	26	1815	1785	2	+	3	1706,18,63,	2,1708,1726,	26,1733,1752,
HS_109:3659|ef4a3d51-e49e-4722-9d61-d22c11d56fa1	3555	12	3549	TRINITY_DN4804_c1_g1_i1	4553	1016	4553	3535	2	-	1	3537,	6,	1016,
HS_100:2131|9b356cd4-fb34-4453-800f-21a6a42c72e5	2030	0	2030	TRINITY_DN24599_c0_g1_i5	7943	5381	7419	2016	5	+	6	634,165,784,7,11,420,	0,640,807,1591,1598,1610,	5381,6028,6194,6979,6988,6999,
HS_93:354|f57fa339-70b8-4c0d-80c3-75105447c980	260	0	260	TRINITY_DN8405_c0_g2_i1	428	7	318	260	0	-	2	9,251,	0,9,	7,67,
HS_89:1205|22a5bca0-728e-4853-8a15-243d9387895b	1116	1	1113	TRINITY_DN4769_c0_g1_i17	4281	385	1617	1108	4	-	3	627,411,74,	3,630,1041,	385,1126,1543,
HS_94:2047|e59a7c3d-e7d6-46e9-810a-bc9a2852e986	1967	0	1965	TRINITY_DN823_c0_g1_i1	2162	91	2056	1953	2	+	3	728,4,1223,	0,737,742,	91,829,833,
HS_91:3874|5a0ab6b5-c016-4dd8-923a-b047aa99bb9c	3814	0	3811	TRINITY_DN7206_c1_g1_i1	3832	10	3821	3807	0	-	3	75,275,3457,	3,79,357,	10,89,364,
HS_108:983|15aaadc9-5ae9-4f12-8797-ac016b1ff2a5	880	2	880	TRINITY_DN12672_c0_g1_i1	2976	245	1123	874	4	+	1	878,	2,	245,
HS_99:748|3c81e3fc-2ff4-4e3e-b956-630ecc48a0cb	650	1	650	TRINITY_DN2744_c2_g1_i1	1051	80	879	648	1	+	2	498,151,	1,499,	80,728,
HS_112:2471|3b6732d7-54e0-4f22-a2cd-8582d45e4dab	2371	7	2371	TRINITY_DN897_c0_g1_i5	2881	37	2825	2352	11	-	3	15,746,1602,	0,16,762,	37,52,1223,
HS_101:469|a69f049f-28ad-4441-beb0-9852aa36a2d7	372	0	372	TRINITY_DN119361_c0_g1_i1	861	78	627	370	2	-	2	6,366,	0,6,	78,261,
HS_104:491|3a6538a1-dfe1-430b-934e-e317d3c0f8b8	392	0	392	TRINITY_DN1723_c0_g1_i4	2335	1805	2334	392	0	+	2	384,8,	0,384,	1805,2326,
HS_86:452|ed4ee49c-483c-4f46-ba9f-f622bb726eed	372	0	371	TRINITY_DN8028_c0_g1_i4	2094	657	1904	371	0	+	2	317,54,	0,317,	657,1850,
HS_91:2116|cd3dcd63-a9cb-474b-94d8-088526695c3c	2044	0	2043	TRINITY_DN9529_c0_g1_i6	2676	209	2317	2038	5	+	3	1120,3,920,	0,1120,1123,	209,1363,1397,
HS_97:1235|d4449b8f-a541-4764-90c5-fe559300a4f7	1165	0	1162	TRINITY_DN6551_c0_g1_i1	4257	2747	3909	1162	0	-	1	1162,	3,	2747,
HS_105:360|68a9a31a-ddaa-4f69-aaad-e81a7a3bdcea	265	0	265	TRINITY_DN10586_c5_g1_i1	605	256	530	264	1	+	4	204,25,29,7,	0,204,229,258,	256,462,488,523,
HS_94:3835|21574202-3706-407d-9b63-db2068f1d0fd	3755	6	3750	TRINITY_DN2619_c0_g1_i10	4122	178	4004	3725	16	-	6	32,16,21,10,230,3432,	5,37,56,77,87,317,	178,211,231,253,264,572,
HS_87:1083|c383c8b2-1167-48c7-bb7c-f9405156ec2e	1001	0	1001	TRINITY_DN70159_c0_g2_i1	1265	4	1008	991	8	-	5	32,76,168,215,508,	0,33,110,278,493,	4,38,114,284,500,
HS_87:932|2ed0b10a-c44f-47db-91e2-42e3012d97c7	852	0	851	TRINITY_DN365_c1_g1_i5	2757	1821	2672	844	7	-	1	851,	1,	1821,
HS_90:4485|076f8b06-9f7f-4cc2-a736-a854821af2d0	4406	1	4398	TRINITY_DN34_c0_g2_i1	4446	10	4407	4396	1	-	1	4397,	8,	10,
HS_101:1115|eebd5526-a2a7-4351-b180-b1523a9b7a64	1017	7	1016	TRINITY_DN3761_c0_g2_i1	2028	711	1868	1009	0	+	3	49,802,158,	7,56,858,	711,814,1710,
HS_100:701|9e6d8bd8-27d7-424a-9676-d3b5c065f7ff	611	3	611	TRINITY_DN32671_c0_g1_i19	3459	69	694	606	2	+	2	41,567,	3,44,	69,127,
HS_96:687|69182265-d92d-4ae2-8fe6-53ff6313a040	609	2	609	TRINITY_DN108741_c0_g1_i1	707	56	681	604	3	-	2	510,97,	0,510,	56,584,
HS_104:946|7de486d4-4d4e-4524-9c2c-349dcd3576d3	847	1	847	TRINITY_DN10778_c0_g1_i14	2444	364	1227	845	1	+	2	577,269,	1,578,	364,958,
HS_99:373|3437ad35-799a-427e-a0b0-19c985c4bb73	278	0	278	TRINITY_DN13716_c0_g1_i4	4392	366	645	276	2	-	2	43,235,	0,43,	366,410,
HS_90:839|28268d22-b131-4052-8797-290bba881f93	757	0	755	TRINITY_DN13516_c0_g1_i1	802	40	795	754	0	+	3	561,121,72,	0,562,683,	40,601,723,
HS_95:727|2fea97b6-1d1d-4e27-9c9b-22bce3007a3c	629	0	629	TRINITY_DN7306_c0_g1_i3	949	66	835	626	3	-	2	135,494,	0,135,	66,341,
HS_104:954|72d53ba4-5a32-407c-a6fe-88ef14e60d7e	867	1	866	TRINITY_DN13520_c0_g1_i1	936	0	865	863	2	+	1	865,	1,	0,
HS_104:407|4a8a8fca-0e7d-4790-bca9-8bd6e6089927	306	0	306	TRINITY_DN112118_c0_g1_i1	986	601	907	305	1	+	1	306,	0,	601,
HS_95:719|ee11748a-4673-4add-a85e-ca8ad116411d	624	0	624	TRINITY_DN3552_c5_g1_i1	721	38	667	619	3	-	6	146,74,215,32,119,36,	0,147,222,437,469,588,	38,184,258,474,511,631,
HS_84:857|6365e5f3-3a0b-46c5-875e-635510352301	787	0	787	TRINITY_DN7306_c0_g1_i3	949	58	844	782	4	-	2	243,543,	0,244,	58,301,
HS_100:1514|b977fad7-f203-4c9b-ae40-f0eec6357e77	1423	3	1420	TRINITY_DN10228_c0_g1_i1	1831	76	1493	1417	0	+	1	1417,	3,	76,
HS_94:1161|1b7c9ca5-3cda-4371-b42d-252873bbe5ce	1077	0	1077	TRINITY_DN3285_c1_g1_i3	3612	980	2339	1071	3	+	3	814,6,254,	0,817,823,	980,1794,2085,
HS_86:906|4d1a2302-7286-4f12-b6d5-41db7e013d42	822	0	822	TRINITY_DN8603_c0_g1_i16	4241	17	840	814	7	-	2	650,171,	0,651,	17,669,
HS_86:860|d321b855-47e7-4124-90a1-0f33146b68a9	801	2	801	TRINITY_DN8908_c0_g1_i6	1719	158	968	794	3	-	2	711,86,	0,713,	158,882,
HS_107:471|5936f893-7c67-4259-a2f7-29d37ef47cc2	365	0	365	TRINITY_DN12908_c0_g1_i3	1020	392	1017	363	2	+	3	170,189,6,	0,170,359,	392,820,1011,
HS_91:613|3c74f1cf-7377-4916-a137-69da59849a6a	527	0	527	TRINITY_DN2699_c0_g1_i6	899	107	894	524	1	+	4	251,248,20,6,	0,251,501,521,	107,523,771,888,
HS_102:753|a05d4a78-fcb4-4fa7-979d-76ce85f65e96	655	3	655	TRINITY_DN4574_c2_g1_i2	951	5	677	652	0	+	2	250,402,	3,253,	5,275,
HS_89:995|b8de3c88-5e55-434e-b64c-b81eab157403	908	0	908	TRINITY_DN26193_c0_g2_i1	1388	445	1368	902	3	+	15	12,39,60,25,32,4,65,204,122,10,51,14,148,73,46,	0,13,52,113,138,170,174,239,443,565,575,626,640,789,862,	445,457,499,561,589,622,627,693,898,1021,1033,1085,1100,1248,1322,
HS_97:785|5ebcfd83-8fe0-4db0-9f6b-2715d93deb3d	682	0	682	TRINITY_DN7048_c0_g2_i1	1042	112	987	681	1	+	2	275,407,	0,275,	112,580,
HS_91:346|35eb88df-ad27-46d0-9353-3d75d8c4e2de	255	0	255	TRINITY_DN63825_c0_g1_i1	1049	744	998	254	0	+	2	206,48,	0,207,	744,950,
HS_102:365|b7b893aa-18e5-4fb1-8c29-ec8b503f5ebe	266	0	266	TRINITY_DN8530_c1_g1_i2	2038	620	893	264	1	+	3	238,22,5,	0,239,261,	620,858,888,
HS_102:549|912b3e19-5c42-4979-9ce5-c6c917d94f4f	459	1	459	TRINITY_DN5707_c2_g1_i1	595	48	516	455	3	+	2	453,5,	1,454,	48,511,
HS_100:1100|a15095d5-6cb9-4200-8848-7f09faf57c52	1007	2	1001	TRINITY_DN16036_c0_g1_i39	2840	57	1059	997	2	+	3	843,46,110,	2,845,891,	57,901,949,
HS_104:361|3002304c-f570-4440-ab5a-a0d48fd6feaa	264	0	262	TRINITY_DN4502_c0_g1_i2	3677	3398	3660	262	0	+	1	262,	0,	3398,
HS_99:1524|f571ce0b-5c40-4773-9aa6-5ff9eaf3c43d	1428	4	1424	TRINITY_DN5630_c1_g1_i1	1574	70	1490	1420	0	+	1	1420,	4,	70,
HS_86:681|1d72b0f0-8794-42e6-98e5-11e29fc2e3d8	604	0	604	TRINITY_DN1427_c0_g1_i1	3239	30	3155	599	5	+	3	95,382,127,	0,95,477,	30,381,3028,
HS_95:1112|54795556-b360-4943-af92-fca9f9d98527	1026	0	1021	TRINITY_DN9560_c0_g1_i14	5031	327	2660	1018	3	+	2	643,378,	0,643,	327,2282,
HS_82:403|db383d22-9731-4b88-b6fb-ecc7036a950d	317	0	315	TRINITY_DN6380_c0_g1_i1	1834	1267	1716	314	0	+	3	5,189,120,	0,5,195,	1267,1389,1596,
HS_96:965|2d3ea447-0781-4b3b-abf3-f89a98d994f0	867	1	867	TRINITY_DN79061_c0_g1_i1	2215	116	1099	859	7	+	2	861,5,	1,862,	116,1094,
HS_104:733|66a090ed-1388-4fa7-81c7-075ed0fb0321	621	3	621	TRINITY_DN7306_c0_g1_i3	949	73	831	615	3	-	2	153,465,	0,153,	73,366,
HS_91:1694|3384f11f-6752-469c-ac9f-3ac09ee8f310	1601	0	1588	TRINITY_DN7787_c0_g2_i1	1687	18	1607	1587	1	-	2	4,1584,	13,17,	18,23,
HS_86:349|5385e10b-50ac-4946-945b-2133a9c51a72	263	0	263	TRINITY_DN6610_c0_g1_i7	2085	962	1345	263	0	-	4	30,5,68,160,	0,30,35,103,	962,993,1040,1185,
HS_85:2360|b5c00c64-22ee-40db-8657-e3b61c81e108	2271	2	2266	TRINITY_DN1692_c0_g1_i1	2513	108	2501	2249	13	-	8	332,179,483,329,21,3,12,903,	5,339,518,1001,1330,1351,1354,1366,	108,440,699,1224,1554,1576,1580,1598,
HS_95:333|c2916963-0913-486f-9e04-b0d91386f81c	238	0	238	TRINITY_DN23833_c0_g1_i1	659	412	650	236	2	-	1	238,	0,	412,
HS_102:850|5acf0837-ce3a-4f51-a98c-f00ac83a94fe	749	2	748	TRINITY_DN557_c0_g2_i10	1344	92	1102	746	0	-	2	611,135,	1,612,	92,967,
HS_89:1352|b6bed3b2-14be-42e8-9eff-41c0ffb9716c	1281	0	1281	TRINITY_DN3626_c0_g1_i8	2771	97	1759	1274	7	-	3	11,1264,6,	0,11,1275,	97,181,1753,
HS_100:3967|a6ad4f54-1d57-4b04-829d-69b515f47649	3884	3	3875	TRINITY_DN5218_c0_g1_i12	4459	147	4018	3846	14	+	10	304,26,91,189,35,30,68,59,1150,1908,	3,314,342,433,623,659,689,757,816,1967,	147,455,481,573,762,799,831,900,960,2110,
HS_92:2338|68c46eba-dd4d-42b5-9b3d-2e2c48979df7	2260	0	2256	TRINITY_DN4819_c0_g1_i1	2438	42	2414	2249	5	+	5	14,999,953,25,263,	0,15,1014,1967,1993,	42,58,1172,2126,2151,
HS_83:1785|733a1aac-4f46-4ac5-9edf-6890dc328fb9	1767	2	1767	TRINITY_DN9053_c1_g1_i3	2847	7	1841	1759	0	+	4	7,5,1345,402,	2,9,15,1365,	7,15,20,1439,
HS_101:1744|9b4d5b0b-531b-43c2-9dca-716bfc7e45b0	1666	0	1666	TRINITY_DN5791_c0_g2_i6	5228	3133	4821	1651	6	+	18	210,19,105,69,75,14,12,31,12,51,27,14,105,5,37,628,25,218,	0,210,232,338,408,483,497,509,540,552,603,630,644,749,756,793,1423,1448,	3133,3344,3364,3469,3542,3619,3634,3649,3683,3696,3749,3777,3792,3901,3907,3946,4574,4603,
HS_111:1340|01e82601-77b7-4bb8-8b18-08db67734c1f	1240	2	1240	TRINITY_DN10843_c1_g1_i3	3977	60	1937	1233	3	+	4	4,7,856,369,	2,7,15,871,	60,64,71,1568,
HS_105:2866|fce6c73f-0135-4ee1-a9bc-a3e25968f9a4	2801	3	2789	TRINITY_DN2762_c0_g3_i2	2965	68	2874	2773	13	+	2	2776,10,	3,2779,	68,2864,
HS_105:1250|7624682a-bdea-4d00-8a20-913000435a21	1158	2	1158	TRINITY_DN365_c1_g1_i5	2757	1483	2638	1147	8	-	2	530,625,	0,531,	1483,2013,
HS_93:674|06f3fa00-0b09-44fc-9e41-d61bfe603b71	579	0	577	TRINITY_DN15789_c0_g1_i4	1830	942	1739	574	3	+	2	323,254,	0,323,	942,1485,
HS_105:1002|f293a0fc-2861-4e88-b8c7-6bbe030c1d95	904	1	900	TRINITY_DN5100_c1_g1_i1	1735	15	1532	897	0	-	3	138,619,140,	4,143,763,	15,153,1392,
HS_87:1204|17b51d6a-2a1d-4575-b645-81d40e637d82	1118	0	1112	TRINITY_DN4745_c0_g1_i10	1438	93	1425	1110	2	+	2	214,898,	0,214,	93,527,
HS_97:607|fec6b33e-834a-4e11-b96a-92d4b454c89c	510	2	510	TRINITY_DN56173_c0_g1_i1	789	274	786	506	2	-	3	51,51,406,	0,51,102,	274,327,380,
HS_85:2103|338c09c2-e67d-4bd0-857b-5a3a29172486	2020	1	2016	TRINITY_DN36987_c0_g1_i2	2281	39	2258	2002	11	-	6	121,61,504,1192,18,117,	4,125,187,691,1884,1902,	39,162,223,855,2074,2141,
HS_92:590|5316ff08-ca10-40cd-aadc-434fd0386a21	509	0	509	TRINITY_DN3627_c0_g1_i1	1696	36	555	505	4	-	3	158,253,98,	0,158,411,	36,195,457,
HS_102:1302|f1484088-d260-42ab-ae93-9b3aa9af6c8d	1215	0	1215	TRINITY_DN47545_c1_g1_i1	1530	53	1367	1205	4	-	2	201,1008,	0,207,	53,359,
HS_85:441|1c318947-5389-43f7-b8e3-d9771945dc15	354	0	354	TRINITY_DN5449_c1_g1_i2	2464	1994	2458	354	0	+	3	297,52,5,	0,297,349,	1994,2390,2453,
HS_103:835|e3f86cc4-78d0-40b0-a320-4eb5efb394e2	732	1	732	TRINITY_DN19569_c0_g1_i3	2900	965	2448	727	3	-	5	252,391,58,4,25,	0,252,643,702,706,	965,1958,2353,2411,2423,
HS_95:1729|9b2f5ea4-959f-4041-af53-d24a9b77f7e5	1643	0	1638	TRINITY_DN3752_c0_g1_i1	3212	59	3127	1633	5	+	4	97,390,618,533,	0,97,487,1105,	59,735,1230,2594,
HS_97:1473|8a168986-f64a-4e80-bcc1-e700deb9e9ad	1383	4	1383	TRINITY_DN9309_c0_g1_i4	2721	634	2335	1376	3	-	3	680,409,290,	0,680,1089,	634,1338,2045,
HS_88:1140|04649384-1348-478b-8d73-653db53088ff	1057	0	1052	TRINITY_DN4613_c1_g1_i1	2110	46	1098	1048	3	-	3	40,26,985,	5,46,72,	46,86,113,
HS_89:469|2ec7646c-a3ed-4a7c-b425-219fd86b5ba6	384	0	384	TRINITY_DN11857_c2_g1_i1	633	2	393	382	2	-	2	33,351,	0,33,	2,42,
HS_100:4002|18d63a4b-6650-4098-be16-ebe69a43adc4	3936	9	3924	TRINITY_DN24608_c0_g1_i1	4074	6	3928	3907	4	+	7	22,10,8,373,3418,48,32,	9,31,42,50,423,3841,3892,	6,29,39,48,424,3843,3896,
HS_97:534|3a611c20-f95e-473b-94ff-27dd3ba6088c	426	0	425	TRINITY_DN18534_c0_g2_i2	2972	311	1536	424	1	-	2	386,39,	1,387,	311,1497,
HS_89:447|eb47eca3-230f-4c0b-9ef5-1127b84e81a1	358	0	358	TRINITY_DN13614_c0_g2_i2	3057	1116	1811	355	1	+	3	321,30,5,	0,323,353,	1116,1437,1806,
HS_108:1908|6dafdd28-f96b-4ce1-b44e-5e3fdc21ea96	1805	0	1804	TRINITY_DN5609_c0_g1_i3	3237	1249	3102	1796	1	-	3	794,16,987,	1,795,818,	1249,2088,2115,
HS_94:1405|7ff4a9c5-9160-4d46-9e15-86aac653dd26	1321	0	1318	TRINITY_DN3285_c0_g1_i1	3432	91	3355	1316	2	-	6	23,340,4,634,94,223,	3,26,366,370,1004,1098,	91,115,530,2234,3023,3132,
HS_95:822|a4249c21-4a10-487c-b31b-5d37cc9a6dc8	735	1	732	TRINITY_DN2604_c0_g1_i8	1361	281	1012	728	3	+	1	731,	1,	281,
HS_103:938|568ac0e6-dcf9-4972-9ac9-411a4e3178c1	847	1	847	TRINITY_DN365_c1_g1_i5	2757	1828	2674	840	6	-	1	846,	0,	1828,
HS_88:3148|b7db9f38-eb88-4e05-88c9-dbe28ff318bc	3073	10	3071	TRINITY_DN25887_c0_g1_i8	3256	21	3256	3050	9	-	5	8,1452,1530,49,20,	2,10,1462,2992,3043,	21,30,1656,3187,3236,
HS_99:561|04441058-ce88-4312-bd6c-f309814579b5	462	0	462	TRINITY_DN373_c3_g1_i1	564	23	493	459	0	+	8	54,148,67,14,31,97,31,17,	0,55,203,270,284,316,414,445,	23,80,229,297,314,345,442,476,
HS_105:315|37e41f56-d667-48a6-9510-e08eb0a2edca	212	0	212	TRINITY_DN5101_c1_g1_i7	4840	1475	4312	211	1	+	3	30,5,177,	0,30,35,	1475,4129,4135,
HS_90:494|ce8dced4-7be1-4f9c-a410-192e9e19a5d9	407	1	407	TRINITY_DN23017_c2_g5_i2	811	234	639	404	0	-	2	120,284,	0,122,	234,355,
HS_105:1218|198bc7de-cabb-4622-b5f0-c10c6c647e00	1122	7	1122	TRINITY_DN14639_c1_g1_i3	3881	2749	3865	1112	2	-	3	512,85,517,	0,513,598,	2749,3261,3348,
HS_100:910|68ea552e-959d-42ab-aee4-9e0ac7e6f41e	811	0	808	TRINITY_DN3571_c0_g1_i1	882	12	824	807	1	+	4	692,33,33,50,	0,692,725,758,	12,705,739,774,
HS_105:579|d7a83332-ba25-4631-943f-d39f12666869	480	0	480	TRINITY_DN35049_c0_g1_i1	1481	692	1172	476	4	-	1	480,	0,	692,
HS_86:1514|465c5d3d-7f2d-4e14-bac6-55ef490b69d4	1437	0	1427	TRINITY_DN2575_c0_g1_i18	1938	0	1851	1426	0	-	7	18,5,668,95,63,168,409,	10,28,34,702,797,860,1028,	0,20,25,801,988,1126,1442,
HS_97:2524|5c2a2f46-b594-42fc-b9fd-9594c3c4d2fb	2431	0	2426	TRINITY_DN567_c0_g1_i4	2763	157	2685	2425	1	+	3	1818,327,281,	0,1818,2145,	157,2034,2404,
HS_113:464|3857d85e-5672-4551-99a3-da5bc6d60468	353	3	353	TRINITY_DN5919_c0_g1_i3	1268	50	644	350	0	+	3	274,68,8,	3,277,345,	50,326,636,
HS_103:411|3329c4b6-1bd0-4598-aa8c-818ba9c6675f	319	0	319	TRINITY_DN16319_c0_g4_i1	3980	1973	2535	319	0	-	2	6,313,	0,6,	1973,2222,
HS_99:713|eacf90a9-c5fc-4ff1-85db-845aaabd3e39	607	1	604	TRINITY_DN482_c2_g1_i1	3296	936	1587	601	2	+	2	360,243,	1,361,	936,1344,
HS_80:1323|a5737b86-2c82-4145-943f-6c49ef2c60bf	1249	0	1244	TRINITY_DN7038_c1_g1_i2	2207	173	2120	1238	4	-	5	51,729,6,128,328,	5,57,786,793,921,	173,224,956,962,1792,
HS_85:1335|cf13d239-64e1-4dc6-8fd3-139a4971e23b	1286	0	1280	TRINITY_DN1732_c0_g2_i1	2521	81	1541	1280	0	-	2	298,982,	6,304,	81,559,
HS_90:1118|aeeac453-edbf-4e87-b38c-b13e61ac4b58	1034	2	1034	TRINITY_DN38828_c0_g1_i1	1437	289	1325	1024	5	+	7	13,25,47,63,65,17,799,	2,17,43,90,153,218,235,	289,303,330,378,442,508,526,
HS_94:694|1309e312-81ab-4032-a832-a2a00ecb3a88	606	0	606	TRINITY_DN22164_c0_g1_i1	1545	316	923	605	1	-	2	443,163,	0,443,	316,760,
HS_111:453|6b91a16b-6b86-4744-9d98-da61c09c3d25	353	1	353	TRINITY_DN1600_c1_g1_i1	5438	161	5433	352	0	+	3	91,245,16,	1,92,337,	161,5169,5417,
HS_104:1070|37230653-74df-43fe-a4c7-ef1d35ce7e3d	961	3	956	TRINITY_DN8289_c1_g1_i11	1410	22	1235	952	1	-	3	12,497,444,	5,17,514,	22,35,791,
HS_93:348|50f2bc0a-f2e3-4ae9-8770-0533c3379fee	252	2	252	TRINITY_DN10258_c2_g1_i2	1355	49	486	250	0	+	2	245,5,	2,247,	49,481,
HS_89:1239|a982837a-5a61-40b2-8abc-0432d6061da4	1165	0	1161	TRINITY_DN2739_c0_g1_i1	1273	82	1243	1154	7	-	1	1161,	4,	82,
HS_90:659|516c8737-0890-40c5-a381-9aaeb27c3173	587	0	587	TRINITY_DN2858_c1_g2_i4	2300	116	1438	587	0	+	3	527,55,5,	0,527,582,	116,1113,1433,
HS_105:1739|6bf926b2-8c4c-4635-82ff-9d53c620b119	1641	5	1641	TRINITY_DN1001_c0_g1_i9	4936	3063	4922	1635	0	-	3	1178,262,195,	0,1179,1441,	3063,4245,4727,
HS_111:2680|a53de79b-9c70-4a47-8bfc-5842145506f8	2585	1	2569	TRINITY_DN12135_c0_g1_i2	2791	78	2646	2567	1	+	1	2568,	1,	78,
HS_97:2311|fc374eb3-dd15-4d96-ac55-3ff0fad4a961	2233	1	2229	TRINITY_DN25831_c0_g1_i6	3254	47	3254	2222	3	-	5	16,12,137,568,1492,	4,20,35,172,740,	47,69,85,242,1762,
HS_90:653|9f1e1434-6291-4436-8a06-deb116341300	557	0	553	TRINITY_DN1257_c1_g1_i6	2708	115	2674	553	0	-	2	270,283,	4,274,	115,2391,
HS_93:321|2bd598f1-cad5-4bbc-bfb9-a65442b20728	230	0	230	TRINITY_DN5791_c2_g1_i1	1917	1583	1821	228	1	+	6	34,105,8,25,34,23,	0,34,139,147,172,207,	1583,1618,1725,1735,1764,1798,
HS_93:1149|310021ce-c0ab-4d2e-a812-52512d415a85	1062	0	1061	TRINITY_DN682_c0_g1_i6	3217	1902	3164	1056	5	+	2	589,472,	0,589,	1902,2692,
HS_91:2063|f1812853-3724-491e-bcec-6c162cd85fb2	1997	0	1996	TRINITY_DN16788_c0_g1_i4	2251	148	2153	1991	1	+	4	149,1808,16,19,	0,149,1958,1977,	148,310,2118,2134,
HS_91:805|813df541-66d1-47d2-b200-83f781830578	726	0	726	TRINITY_DN365_c1_g1_i5	2757	1947	2673	719	7	-	1	726,	0,	1947,
HS_106:548|5eee1654-e6c8-4af3-866f-385f4e3a8c97	446	1	446	TRINITY_DN1838_c0_g1_i17	5331	20	477	444	1	+	3	13,43,389,	1,14,57,	20,35,88,
HS_63:3846|4fab7460-e5de-478e-8404-af01d5016600	3796	3	3796	TRINITY_DN3785_c0_g1_i19	8647	57	4391	3788	5	+	3	2102,1656,35,	3,2105,3761,	57,2698,4356,
HS_93:320|e7959e3a-9be4-4575-8dff-2607de3d5128	229	0	229	TRINITY_DN23606_c0_g1_i1	668	245	474	228	0	+	3	5,8,215,	0,6,14,	245,250,259,
HS_91:4647|c285d05c-b524-42cc-9a29-3f0145d1ad4a	4590	0	4590	TRINITY_DN4798_c0_g1_i6	4999	62	4807	4584	5	+	5	18,23,2252,2251,45,	0,19,42,2294,4545,	62,80,105,2509,4762,
HS_87:1139|2420cfa4-6113-4c0b-9c74-36e9810e4979	1064	2	1059	TRINITY_DN28269_c0_g1_i1	1124	8	1067	1054	3	-	3	74,26,957,	5,79,105,	8,83,110,
HS_102:2487|abfe0b05-51d2-409d-85c3-ae6db954af89	2417	19	2417	TRINITY_DN409_c4_g1_i3	4254	24	2418	2394	0	+	3	16,340,2038,	19,36,379,	24,40,380,
HS_88:693|8a75b282-7776-45af-92a3-80e93972d6ed	609	0	604	TRINITY_DN2905_c2_g1_i2	1909	1165	1817	604	0	+	2	159,445,	0,159,	1165,1372,
HS_96:633|36c02d15-8373-42bc-a885-60dd32d404a4	538	0	537	TRINITY_DN8059_c1_g1_i8	1957	437	1687	533	4	-	3	439,93,5,	1,440,533,	437,1098,1682,
HS_98:2931|e6131887-6919-4258-8d4f-37de052d1786	2900	2	2897	TRINITY_DN1894_c0_g1_i10	3101	0	2892	2875	9	-	2	32,2852,	3,46,	0,40,
HS_85:1086|a590a9ba-6ecb-4238-8baf-b9931d66fa8f	996	0	996	TRINITY_DN15778_c0_g2_i2	1158	47	1120	991	5	-	5	7,770,114,99,6,	0,7,777,891,990,	47,92,865,980,1114,
HS_105:591|07085f17-f560-4225-b688-f68b5a73385f	492	0	492	TRINITY_DN10945_c0_g2_i8	1356	739	1231	488	4	-	1	492,	0,	739,
HS_106:509|3da916d2-450b-4e77-933f-11651e45c828	405	0	405	TRINITY_DN1463_c0_g1_i4	1592	28	734	402	3	-	2	360,45,	0,360,	28,689,
HS_87:2075|906b0668-7779-446e-b808-8b5839c0060c	2019	0	2016	TRINITY_DN8101_c1_g1_i3	2298	111	2260	2000	2	+	9	1117,4,189,523,12,82,47,23,5,	0,1117,1121,1310,1833,1852,1935,1988,2011,	111,1252,1285,1551,2075,2093,2175,2229,2255,
HS_107:3566|0753fd86-3146-4a74-9df3-1f3258bee535	3482	15	3481	TRINITY_DN3623_c0_g1_i6	7068	2	3961	3466	0	+	4	10,104,3233,119,	15,25,129,3362,	2,15,529,3842,
HS_91:404|733f9412-227a-4a3d-830b-e57311f6a3cc	318	0	318	TRINITY_DN12114_c1_g1_i1	1252	3	318	315	0	+	3	12,11,292,	0,14,26,	3,15,26,
HS_101:894|391aac59-474a-46c5-a428-12f53653aaaa	795	0	795	TRINITY_DN2158_c0_g1_i4	2954	328	1125	790	5	-	2	635,160,	0,635,	328,965,
HS_94:1270|ae268712-4be1-46e7-aaa5-a0c5fb378280	1183	3	1180	TRINITY_DN17274_c1_g1_i2	1994	574	1751	1177	0	+	1	1177,	3,	574,
HS_93:621|1ec45d92-42cc-44c1-9198-c2dce51920a0	529	0	529	TRINITY_DN11229_c0_g1_i2	2040	1383	2035	529	0	+	4	474,7,30,18,	0,474,481,511,	1383,1858,1866,2017,
HS_112:848|3d7d4a05-6c81-48a6-9c18-1407dd20f2fc	742	0	742	TRINITY_DN1890_c0_g1_i4	838	6	749	740	2	-	2	69,673,	0,69,	6,76,
HS_103:1892|900c9045-3525-4398-b1e9-8c6aded6a8c4	1794	2	1793	TRINITY_DN1893_c0_g2_i2	1942	112	1903	1791	0	-	1	1791,	1,	112,
HS_101:2725|77bde4e8-c8cb-4254-9fb4-e56c46d25ef5	2625	3	2621	TRINITY_DN27336_c0_g1_i13	2856	24	2838	2615	2	-	6	274,61,1501,407,367,7,	4,278,339,1840,2248,2615,	24,411,550,2055,2462,2831,
HS_94:971|1fb2a94d-f164-4b1c-8c6c-797594df9e57	881	0	881	TRINITY_DN37335_c0_g1_i1	1423	460	1338	876	2	+	4	30,818,14,16,	0,31,850,865,	460,490,1308,1322,
HS_68:1757|c760605b-ff26-4d86-998c-044e8f54fc51	1702	2	1699	TRINITY_DN20586_c0_g1_i16	2084	34	1887	1692	2	-	4	570,710,362,52,	3,573,1283,1648,	34,691,1473,1835,
HS_92:350|e8fd6cb9-0e09-4f00-aa63-b9cd1f819230	260	0	260	TRINITY_DN9005_c0_g1_i5	3598	3268	3530	258	2	+	2	124,136,	0,124,	3268,3394,
HS_97:1004|f7a7eeda-c4b7-4b5d-b907-7c497ea10704	929	0	925	TRINITY_DN6020_c0_g1_i1	1470	507	1433	922	2	-	2	40,884,	4,45,	507,549,
HS_96:1045|5c7c54f1-d17a-41c5-ab79-0f2a339872de	958	2	958	TRINITY_DN865_c0_g2_i1	1741	775	1733	949	1	-	3	12,912,26,	0,16,930,	775,790,1707,
HS_100:1021|26ec2b86-d6e0-4618-bf1d-43349a11e080	937	3	937	TRINITY_DN1085_c0_g1_i20	3232	36	1404	929	5	+	2	929,5,	3,932,	36,1399,
HS_102:1082|4038c19f-341f-4d0b-a1b8-4c31d4fb470e	986	5	985	TRINITY_DN13002_c0_g1_i2	1311	169	1311	980	0	-	2	395,585,	1,396,	169,726,
HS_84:1284|b5e4a658-61a2-4876-aae0-da9f0403b45f	1251	2	1249	TRINITY_DN3617_c0_g1_i23	2574	22	2492	1245	0	+	6	11,121,213,121,746,33,	2,13,135,348,469,1216,	22,34,160,1236,1710,2459,
HS_91:2989|71494b6c-a2ed-4ae4-8a74-155a6ab13ced	2903	4	2898	TRINITY_DN1894_c0_g1_i10	3101	0	2888	2874	7	-	7	40,23,10,11,8,49,2740,	5,45,68,83,95,103,159,	0,41,66,79,90,99,148,
HS_96:582|89931354-8a21-483b-adc5-5b231fbab64a	484	2	484	TRINITY_DN19819_c0_g1_i1	3581	2664	3152	481	0	+	5	371,10,4,48,48,	2,373,383,387,436,	2664,3036,3049,3054,3104,
HS_107:1696|b24497db-a91e-4dc6-98fe-2343ed410250	1609	2	1608	TRINITY_DN25770_c0_g1_i11	2640	143	2452	1603	3	+	4	446,549,359,252,	2,448,997,1356,	143,741,1400,2200,
HS_107:440|b26ecda9-82a4-4702-b756-0abcb8d0bf9f	338	0	338	TRINITY_DN1481_c5_g1_i1	1341	255	698	338	0	+	3	96,235,7,	0,96,331,	255,393,691,
HS_92:1029|29e49052-94f5-47fa-9747-d716a1aea362	943	2	940	TRINITY_DN8163_c0_g1_i7	6354	6	3186	935	1	+	4	10,23,77,826,	2,13,37,114,	6,16,41,2360,
HS_96:472|88fbec55-6610-432c-8e83-bd464de86e16	384	0	384	TRINITY_DN3128_c0_g1_i6	2428	2	456	382	0	-	3	7,87,288,	0,7,96,	2,81,168,
HS_89:684|f93241b0-6742-4986-b112-9b7edc226dc3	605	0	601	TRINITY_DN89217_c0_g4_i1	857	34	633	599	0	-	3	44,162,393,	4,49,212,	34,78,240,
HS_97:883|505a0992-e6a0-41cd-ad19-ce6d797b3359	778	1	778	TRINITY_DN2604_c0_g1_i8	1361	107	1118	773	4	+	2	479,298,	1,480,	107,820,
HS_93:1703|5f359c37-9bdb-4606-a79b-4d1837ffe5e4	1656	0	1655	TRINITY_DN8219_c0_g1_i7	2141	32	1756	1645	10	+	2	1163,492,	0,1163,	32,1264,
HS_89:1553|7b1f0091-5fae-466c-a26d-8f7a46686fe9	1491	0	1491	TRINITY_DN1958_c1_g2_i4	4744	2007	4653	1486	5	-	3	7,216,1268,	0,7,223,	2007,2069,3385,
HS_99:1844|64ac1fd3-605b-498b-926d-634f59a08f79	1761	3	1757	TRINITY_DN3057_c0_g1_i2	1986	55	1813	1745	9	-	4	8,1665,18,63,	4,12,1677,1695,	55,65,1731,1750,
HS_96:836|b506bba7-0cc1-4d1e-93db-0fdbf9565b72	746	0	746	TRINITY_DN365_c1_g1_i5	2757	1928	2674	740	6	-	1	746,	0,	1928,
HS_94:975|eec2e1f6-87c1-48c1-8aef-65a6ac0b3b69	907	0	907	TRINITY_DN17850_c0_g1_i8	2795	1361	2268	907	0	+	1	907,	0,	1361,
HS_100:836|3b175974-9b46-4f46-b0a6-3cfbb0635a89	733	0	733	TRINITY_DN365_c1_g1_i5	2757	1956	2689	726	7	-	1	733,	0,	1956,
HS_109:1059|96711f72-b965-464b-ac88-4b1746e41a87	960	5	960	TRINITY_DN1414_c0_g3_i1	1193	45	1109	953	2	+	2	567,388,	5,572,	45,721,
HS_104:1710|c9ac951a-2928-4036-bafb-e0bfd23510a7	1605	2	1593	TRINITY_DN31655_c0_g1_i2	1835	0	1758	1590	1	-	4	7,725,108,751,	12,19,744,852,	0,19,787,1007,
HS_100:315|71aaa25e-b729-443b-882b-02035f9f77c6	214	0	214	TRINITY_DN3025_c0_g1_i2	5487	470	848	214	0	+	3	136,67,11,	0,136,203,	470,610,837,
HS_100:1950|a7a74a37-d9eb-4e7d-b8f5-dad4e2eff59c	1891	2	1890	TRINITY_DN2468_c0_g2_i2	2173	165	2106	1885	3	-	3	230,1234,424,	1,231,1465,	165,397,1682,
HS_100:1150|c59d9a21-4621-4eaf-a31e-5c7861b5337c	1065	3	1065	TRINITY_DN4160_c0_g1_i25	3152	26	1131	1057	5	+	2	361,701,	3,364,	26,430,
HS_104:588|7f0f59a7-bd30-448c-96cf-91a2af4b1a36	501	0	500	TRINITY_DN14248_c0_g1_i5	6771	2774	3280	500	0	+	2	205,295,	0,205,	2774,2985,
HS_86:463|b5bc35c0-aa31-4311-9904-4e3b36a5074d	381	0	381	TRINITY_DN40327_c0_g1_i2	757	12	393	379	1	-	3	6,157,217,	0,6,164,	12,19,176,
HS_93:707|fbc38a10-1fdf-4a9d-9630-b8101efe6f49	628	0	628	TRINITY_DN4340_c0_g1_i3	1509	176	1391	623	3	+	4	226,9,381,10,	0,228,237,618,	176,402,753,1381,
HS_102:466|bbbdc5b1-8950-4e15-82c3-84a6054674c4	372	0	372	TRINITY_DN4340_c0_g1_i3	1509	781	1219	369	3	+	2	253,119,	0,253,	781,1100,
HS_105:4524|c0bde604-c668-4ed7-8c70-e3590dc5c06f	4461	3	4460	TRINITY_DN5612_c0_g1_i18	5054	48	4509	4437	15	+	5	789,45,1389,1889,340,	3,795,842,2231,4120,	48,843,889,2279,4169,
HS_90:1919|fc899891-3a3f-4f63-b66a-6ce8ce998bc6	1845	0	1845	TRINITY_DN3180_c0_g1_i4	2993	15	2910	1829	10	-	3	673,984,182,	0,673,1663,	15,1743,2728,
HS_86:332|02613fd7-a3a1-4677-892a-d1aaf96abcff	256	0	256	TRINITY_DN1242_c0_g2_i5	1477	7	270	255	1	-	2	251,5,	0,251,	7,265,
HS_104:455|07d29cb6-bffd-426f-91d8-ae97aeeeb3d9	351	0	351	TRINITY_DN71856_c0_g1_i1	1251	550	903	348	2	+	5	157,57,30,72,34,	0,157,214,244,317,	550,708,766,797,869,
HS_96:1957|8c3d070a-21a5-4171-85b5-ef84abc51308	1864	6	1864	TRINITY_DN10473_c0_g1_i1	2451	387	2246	1846	7	-	9	862,45,26,131,542,166,21,37,23,	0,865,910,936,1068,1610,1777,1798,1835,	387,1249,1295,1323,1454,1997,2163,2185,2223,
HS_96:4157|da8e8d4b-8913-4e27-984a-547bc796b422	4093	0	4062	TRINITY_DN1369_c0_g1_i2	4291	172	4235	4055	7	+	2	4053,9,	0,4053,	172,4226,
HS_91:757|b5028743-2303-4d7a-a9cf-f4c20800726b	668	0	666	TRINITY_DN969_c0_g1_i5	4560	1975	3323	662	3	-	2	70,595,	2,73,	1975,2728,
HS_86:2167|20f897ac-bbd4-4a56-aa87-18e322a06912	2110	0	2101	TRINITY_DN42553_c0_g2_i1	2152	41	2146	2092	7	+	5	78,2005,6,4,6,	0,78,2083,2090,2095,	41,120,2127,2133,2140,
HS_104:586|f25b601a-c4be-4f3b-a00f-7c0f502bb7b2	487	0	484	TRINITY_DN2596_c1_g1_i2	1565	529	1438	483	0	+	2	380,103,	0,381,	529,1335,
HS_88:750|3bc0ff6d-47a6-4141-8e42-2de96e8426da	661	0	661	TRINITY_DN3487_c0_g1_i2	1453	764	1425	656	5	+	1	661,	0,	764,
HS_87:1140|c98ed842-a021-44f8-9691-45baa4693bdf	1060	0	1053	TRINITY_DN7692_c0_g1_i16	1853	303	1438	1053	0	+	2	178,875,	0,178,	303,563,
HS_98:969|aa9143c1-72e2-45af-bb77-8223bf42d73c	871	0	871	TRINITY_DN6714_c0_g1_i3	1414	395	1381	864	7	-	3	39,812,20,	0,39,851,	395,548,1361,
HS_104:332|edfc7613-7b7f-48c8-8214-731480a0b8a0	233	1	233	TRINITY_DN4185_c0_g1_i1	6194	1142	1655	232	0	-	4	6,15,18,193,	0,6,21,39,	1142,1199,1217,1462,
HS_92:694|d2b61322-a036-4744-a8e4-8cfdc1d73412	602	0	602	TRINITY_DN1196_c1_g2_i7	5693	1147	2166	596	0	-	4	6,78,302,210,	0,6,88,392,	1147,1576,1654,1956,
HS_94:1238|c1fddbe2-6ec5-4408-99b6-b903d1ce2dc5	1154	3	1151	TRINITY_DN47029_c1_g1_i1	1960	646	1794	1148	0	-	1	1148,	3,	646,
HS_108:592|87dd679d-af82-4cb5-9ba7-e202d5fa84c9	479	1	479	TRINITY_DN47244_c1_g1_i2	3565	693	1173	475	0	-	7	27,6,4,165,8,223,42,	0,27,33,38,203,213,436,	693,721,728,732,898,907,1131,
HS_99:1795|f7db4174-6bdd-4866-9d93-2574a37289a0	1737	3	1737	TRINITY_DN5632_c0_g1_i2	2035	166	1991	1730	4	-	4	14,54,624,1042,	0,14,68,692,	166,181,237,949,
HS_98:573|6bf77202-16b2-44c2-a51f-5f6a62d87a08	476	3	475	TRINITY_DN7676_c0_g1_i11	4311	104	4236	472	0	-	3	254,157,61,	1,255,412,	104,3565,4175,
HS_94:382|e5b44d4f-d33f-4e27-a743-06c3144e5d86	296	0	296	TRINITY_DN133_c3_g1_i2	1063	527	878	296	0	+	3	54,4,238,	0,54,58,	527,634,640,
HS_94:676|677fcd6b-681d-48f5-96b3-5f2fe7dccaeb	588	0	585	TRINITY_DN10657_c0_g1_i5	2449	1215	1896	583	2	+	3	369,133,83,	0,369,502,	1215,1679,1813,
HS_106:694|444fb463-aa1d-4006-a47f-0d6b238d0a12	593	2	593	TRINITY_DN15245_c0_g1_i1	1506	444	1496	590	1	-	2	204,387,	0,204,	444,1109,
HS_90:496|6c2d3659-dd52-46d7-9f6f-0968a8682ba9	412	0	408	TRINITY_DN9868_c0_g1_i1	1668	679	1523	408	0	+	2	9,399,	0,9,	679,1124,
HS_102:2588|a8819c4d-14e7-4a38-9429-9f1b70d97395	2468	3	2467	TRINITY_DN49220_c0_g1_i5	3320	29	3301	2458	3	-	3	2257,161,43,	1,2258,2422,	29,3096,3258,
HS_90:904|8be2a9e3-1369-458c-bdad-1598e7d43014	821	0	821	TRINITY_DN6391_c0_g1_i10	1738	245	1147	815	1	+	4	730,15,65,6,	0,730,750,815,	245,986,1009,1141,
HS_101:1385|666d82ab-b86f-4227-bb7f-8b9116d588d5	1292	3	1292	TRINITY_DN1452_c0_g1_i7	1399	47	1337	1280	9	-	2	1252,37,	0,1252,	47,1300,
HS_91:871|8c7bf92a-4a0a-4ec8-92d0-cced28dfadd8	786	0	782	TRINITY_DN21554_c3_g1_i1	1171	110	917	781	0	+	3	6,136,639,	0,7,143,	110,118,278,
HS_103:590|06f4d19e-1a04-423a-8b1d-5c362598bdc3	487	1	486	TRINITY_DN21304_c0_g1_i2	1196	711	1196	485	0	-	1	485,	1,	711,
HS_99:3304|5e5075c5-9ff0-41d8-aec3-009e0088b29f	3239	3	3234	TRINITY_DN16133_c0_g1_i3	3646	93	3554	3219	3	-	6	1861,44,482,490,193,152,	5,1867,1913,2395,2885,3084,	93,1954,1999,2700,3191,3402,
HS_106:375|b721a6f7-d0cb-42fa-bca7-5cf3ad6acac3	270	2	270	TRINITY_DN10303_c0_g1_i1	2351	38	501	268	0	+	2	263,5,	2,265,	38,496,
HS_101:3239|c7ed979b-8992-4cae-ba41-ef77f72b3735	3186	18	3186	TRINITY_DN16709_c1_g1_i4	7373	0	3168	3157	3	+	6	10,42,69,153,610,2276,	18,30,73,146,300,910,	0,11,53,122,275,892,
HS_100:544|d1408f0e-77bb-4a42-bf1d-3251fd275be8	441	0	438	TRINITY_DN6662_c0_g1_i1	1031	11	544	438	0	-	3	117,291,30,	3,120,411,	11,129,514,
HS_99:5548|b3432634-2dd3-43da-b860-df7a61e1da9c	5471	3	5468	TRINITY_DN223_c1_g1_i8	5877	70	5693	5444	9	+	5	160,975,2191,1853,274,	3,172,1150,3341,5194,	70,238,1275,3564,5419,
HS_103:464|56ff1819-8a6a-432f-822c-3e3cf3a6f284	368	0	368	TRINITY_DN5311_c0_g1_i8	4280	1450	4279	367	1	+	2	223,145,	0,223,	1450,4134,
HS_99:2642|d35fa421-1ba8-4804-9d88-c18f3d4e841f	2618	8	2617	TRINITY_DN6315_c0_g1_i6	2633	9	2633	2593	10	-	8	1163,21,92,8,12,16,241,1050,	1,1164,1186,1279,1287,1299,1317,1560,	9,1174,1198,1290,1299,1314,1334,1583,
HS_92:1029|a0898fcf-18ec-4141-83f9-ba4e95e87cb7	954	0	954	TRINITY_DN1695_c0_g1_i24	3450	1691	3124	954	0	-	4	488,225,153,88,	0,488,713,866,	1691,2413,2788,3036,
HS_89:1057|042a956c-7164-4757-a12c-b0c82f5d6867	990	2	990	TRINITY_DN28330_c0_g1_i2	2632	217	2293	987	1	+	2	940,48,	2,942,	217,2245,
HS_101:2308|f91052a4-b4ad-4c55-b3e1-d13ce3b5ae39	2220	3	2216	TRINITY_DN2857_c2_g1_i3	5524	130	3119	2207	4	+	3	1510,4,697,	3,1514,1519,	130,1640,2422,
HS_86:554|e2bbea2d-74ef-4630-a504-0395fa80723b	467	1	467	TRINITY_DN10493_c0_g1_i1	700	56	652	463	1	-	5	5,18,29,36,376,	0,5,23,54,90,	56,125,145,174,276,
HS_95:368|ed391079-faf5-4469-8c1d-a564eadeddb0	276	0	274	TRINITY_DN2650_c0_g3_i1	811	516	808	274	0	+	2	244,30,	0,244,	516,778,
HS_96:595|50ba04ed-b5dd-429e-94c2-a80152156c1e	502	0	502	TRINITY_DN35034_c0_g3_i2	1752	612	1124	497	3	+	6	298,21,92,53,25,11,	0,300,321,413,466,491,	612,915,938,1031,1085,1113,
HS_87:1472|c2ba6eaf-fa3e-4bbf-8d08-8c4368919cfe	1393	0	1390	TRINITY_DN2993_c0_g1_i2	2898	496	2518	1386	2	-	4	735,7,629,17,	3,738,747,1376,	496,1863,1871,2501,
HS_104:3965|23380321-a22a-47de-b1ff-0fef4779355b	3923	2	3923	TRINITY_DN8835_c0_g1_i3	4544	281	4368	3902	3	-	6	1411,1379,1068,25,9,13,	0,1411,2802,3870,3899,3908,	281,1821,3242,4317,4344,4355,
HS_79:320|1241200a-4400-4433-adc2-f85af1cbdb7b	243	0	243	TRINITY_DN26508_c0_g1_i1	2745	282	802	243	0	-	2	9,234,	0,9,	282,568,
HS_94:1260|ea89a937-5c11-4b92-8827-bd9da2559e50	1175	0	1175	TRINITY_DN2657_c2_g2_i2	3027	1598	2981	1173	1	+	4	688,293,83,110,	0,688,981,1065,	1598,2418,2788,2871,
HS_91:4007|957d8b24-ab72-4976-bd7c-a9194b911f6e	3916	0	3915	TRINITY_DN4152_c0_g2_i1	4247	155	4187	3895	19	-	3	27,222,3665,	1,29,251,	155,184,522,
HS_87:353|0ac00481-5150-40f7-9399-259cb31f4605	264	0	264	TRINITY_DN3211_c0_g3_i1	1527	20	289	263	1	-	2	20,244,	0,20,	20,45,
HS_91:705|03c438d0-3e3c-4af5-90a3-c4f588158362	611	3	611	TRINITY_DN7038_c1_g1_i2	2207	385	2045	607	1	-	2	405,203,	0,405,	385,1842,
HS_95:794|385bbc58-f5c5-4508-99ce-29236473a3c7	699	0	698	TRINITY_DN9173_c0_g1_i4	1590	532	1525	696	2	-	3	208,475,15,	1,209,684,	532,1024,1510,
HS_105:488|df4b473d-f0c8-4bd6-abf9-35f7a8c97e2d	385	1	385	TRINITY_DN9796_c0_g1_i4	2999	584	1038	382	2	+	2	377,7,	1,378,	584,1031,
HS_1096:1832|32900cec-15a2-434c-a5eb-9c882fbad67e	754	0	754	TRINITY_DN10484_c0_g1_i4	3531	1089	1842	748	2	+	4	399,21,325,5,	0,400,424,749,	1089,1488,1511,1837,
HS_95:2197|47506895-ef9a-4931-8de4-5f1da6b06294	2094	4	2094	TRINITY_DN3493_c1_g1_i3	8490	6313	8403	2076	14	-	1	2090,	0,	6313,
HS_105:1197|4346042c-5d4b-42f2-a2d4-e0e953a26f8a	1092	0	1092	TRINITY_DN3132_c0_g1_i2	1379	61	1348	1091	1	+	3	822,265,5,	0,822,1087,	61,900,1343,
HS_93:1490|4f9f7baa-be13-47fa-8b37-9069bd04b56d	1412	2	1406	TRINITY_DN1138_c3_g1_i1	1726	114	1694	1400	2	-	4	41,1207,140,14,	6,49,1256,1396,	114,155,1536,1680,
HS_95:416|08af65ad-9438-4fe7-b21e-3ce9b428d1f6	323	0	322	TRINITY_DN17397_c0_g1_i9	1209	519	840	320	0	+	2	211,109,	0,213,	519,731,
HS_96:485|3ee4920f-d955-4ec1-8d56-1238c7705130	392	0	392	TRINITY_DN68502_c0_g1_i1	1120	179	570	390	0	+	4	4,51,30,305,	0,5,56,87,	179,183,235,265,
HS_90:500|bb50451c-24de-4b7d-809c-286f0b8b0aaf	419	0	419	TRINITY_DN118_c0_g1_i2	2519	401	893	416	2	+	3	303,78,37,	0,303,382,	401,778,856,
HS_87:547|fb9c2ad6-4030-4ccc-a3fb-82ecda653587	466	0	466	TRINITY_DN10735_c0_g1_i4	2151	41	1779	463	3	+	3	116,165,185,	0,116,281,	41,432,1594,
HS_93:2588|95eed0b8-eca8-44bc-b46c-d33666510903	2527	0	2527	TRINITY_DN25022_c0_g1_i1	2650	37	2590	2526	1	-	2	5,2522,	0,5,	37,68,
HS_92:402|7d72c8ce-42b7-4054-9679-c1b207c20175	310	0	310	TRINITY_DN175155_c0_g1_i1	472	143	465	310	0	-	4	6,56,96,152,	0,6,62,158,	143,159,216,313,
HS_102:2047|8aca299a-a5dc-4ab9-b23a-8f2cb3227863	1944	0	1944	TRINITY_DN8487_c0_g1_i24	3973	1864	3859	1937	2	-	8	812,6,491,15,5,18,345,247,	0,812,818,1309,1325,1330,1352,1697,	1864,2697,2727,3220,3235,3243,3266,3612,
HS_102:555|3c234af1-892a-41cc-81b4-14cad01b5c59	457	0	455	TRINITY_DN3101_c0_g1_i3	7742	2512	3313	454	1	+	2	58,397,	0,58,	2512,2916,
HS_102:2655|e5010326-00b3-42a0-924c-8b0d42841425	2560	3	2559	TRINITY_DN664_c0_g1_i6	3291	617	3173	2535	19	-	4	226,302,1919,107,	1,229,531,2450,	617,843,1146,3066,
HS_89:1187|1ac0dad0-2076-4efd-a0dc-5c07e65dce41	1106	0	1106	TRINITY_DN132_c1_g1_i3	1517	208	1415	1099	6	+	5	73,709,285,6,32,	0,73,782,1067,1074,	208,286,1091,1377,1383,
HS_103:545|396ace01-ff3e-4ca6-ad41-f861a26f3714	449	0	449	TRINITY_DN550_c3_g1_i4	1317	709	1302	448	1	+	2	52,397,	0,52,	709,905,
HS_93:599|e8364533-4dbb-4315-906b-0da953c3655f	506	4	506	TRINITY_DN8470_c0_g1_i1	836	67	782	501	1	+	2	86,416,	4,90,	67,366,
HS_95:1530|20a75c20-eb9a-4563-af67-3463a6ec8e84	1436	0	1436	TRINITY_DN4251_c0_g1_i5	3288	655	2120	1434	1	+	2	324,1111,	0,325,	655,1009,
HS_98:1534|ae486cf4-a9ad-4fcc-8743-ddeda161bbef	1451	0	1449	TRINITY_DN2524_c1_g1_i2	1816	359	1809	1443	6	-	2	443,1006,	2,445,	359,803,
HS_100:561|4cacda5b-27e5-48c4-b841-5abe70f841b0	463	0	463	TRINITY_DN75725_c0_g1_i1	759	183	652	460	3	+	4	54,5,135,269,	0,54,59,194,	183,239,245,383,
HS_98:919|50ab6d2d-a912-4265-b64c-a6c0faefe753	834	4	834	TRINITY_DN2524_c1_g1_i2	1816	359	1750	826	3	-	3	374,314,141,	0,375,689,	359,1249,1609,
HS_88:2919|9f33edf4-84be-4fc3-9fb7-1d47a59694af	2871	16	2865	TRINITY_DN1837_c0_g2_i5	3517	37	2956	2845	4	+	2	182,2667,	16,198,	37,289,
HS_99:999|32391bfe-e4bf-460f-9f6d-795c915918d4	903	5	903	TRINITY_DN6430_c0_g2_i3	2884	914	2472	895	3	-	2	275,623,	0,275,	914,1849,
HS_90:306|e84c3338-c550-461b-bc1c-4114c69f3a78	214	0	214	TRINITY_DN86_c3_g1_i1	756	80	304	213	1	+	2	209,5,	0,209,	80,299,
HS_97:705|88674739-f699-4bb2-91e0-436b781be407	609	0	606	TRINITY_DN247_c4_g1_i1	641	4	610	604	2	-	1	606,	3,	4,
HS_107:3008|35779423-21f6-430a-a44c-42d5007ffe37	2898	3	2897	TRINITY_DN52407_c0_g1_i3	3107	0	3017	2893	1	-	3	943,770,1181,	1,944,1714,	0,1041,1836,
HS_106:755|53dda5a2-aee7-4a91-8bfb-f657e468ff0e	650	4	648	TRINITY_DN47114_c1_g1_i3	979	251	895	644	0	-	1	644,	2,	251,
HS_102:1874|97bb96c5-949d-4113-8592-89c0062e68f0	1767	2	1763	TRINITY_DN383_c0_g1_i10	4709	1786	3674	1761	0	-	3	306,993,462,	4,310,1303,	1786,2198,3212,
HS_105:1368|d152e64e-1cbd-47f4-8dbd-66556557acd1	1267	2	1267	TRINITY_DN3009_c0_g1_i9	6873	4717	6101	1265	0	+	3	821,438,6,	2,823,1261,	4717,5608,6095,
HS_103:1638|c65b625d-f1af-453f-9f4c-aac7f27bc099	1542	2	1538	TRINITY_DN3470_c0_g1_i10	1926	133	1872	1536	0	+	3	724,73,739,	2,726,799,	133,958,1133,
HS_103:814|6429b9b5-03fe-4a01-bcb9-eb3177bdb59e	717	0	717	TRINITY_DN5232_c0_g1_i78	2591	13	1727	713	1	-	6	76,105,19,114,336,64,	0,79,184,203,317,653,	13,91,210,231,849,1663,
HS_91:400|c1061de4-a580-4023-a980-57ba5d166b57	310	1	310	TRINITY_DN37475_c0_g1_i1	823	146	463	307	2	+	4	57,42,3,207,	1,58,100,103,	146,208,251,256,
HS_97:805|29489ea4-9736-43e6-900f-bd6da83f435b	699	0	699	TRINITY_DN216_c0_g2_i4	3616	1203	2137	698	1	+	2	603,96,	0,603,	1203,2041,
HS_96:3806|e60681f2-d546-47d2-9f44-3d395cef6975	3742	0	3734	TRINITY_DN3389_c2_g1_i2	4408	3	4308	3728	3	-	4	46,14,2399,1272,	8,55,71,2470,	3,49,64,3036,
HS_86:834|1dd2c721-7b7a-4694-a8fe-4d30d7e4360e	767	0	767	TRINITY_DN6986_c1_g1_i4	3924	2009	3910	760	6	+	3	500,9,257,	0,501,510,	2009,2509,3653,
HS_110:331|5ca6cfbd-af2d-44aa-8e2e-f059a5e29723	221	0	221	TRINITY_DN1436_c3_g1_i2	1014	316	564	219	0	+	4	135,49,17,18,	0,135,186,203,	316,457,509,546,
HS_97:372|62003fc7-6109-4fd2-b868-b0774908d9cc	275	0	275	TRINITY_DN8555_c0_g1_i4	1240	808	1087	273	1	+	5	15,106,115,25,13,	0,15,121,237,262,	808,824,931,1048,1074,
HS_91:1577|8d633f5d-38da-46bb-a504-9ca64e74d057	1486	0	1484	TRINITY_DN7517_c0_g1_i5	3163	227	2116	1481	3	+	2	734,750,	0,734,	227,1366,
HS_93:730|381541e8-135f-4bcb-a125-89363e9afc76	640	0	636	TRINITY_DN1517_c0_g1_i13	1796	66	1069	635	0	-	6	100,57,4,172,160,142,	4,104,162,166,338,498,	66,167,224,230,656,927,
HS_90:923|221f61c0-6245-438a-9fd2-8dc5c186f4b7	840	0	838	TRINITY_DN7998_c0_g1_i5	1497	122	1406	838	0	+	2	439,399,	0,439,	122,1007,
HS_91:454|d01e5f7a-534c-46df-9637-28a2573005b2	363	0	363	TRINITY_DN40137_c4_g1_i1	914	26	391	361	1	-	5	32,19,18,238,55,	0,32,52,70,308,	26,59,78,97,336,
HS_98:992|d2113311-d468-48ae-84e9-6e7b7846931c	895	2	892	TRINITY_DN997_c0_g1_i51	1933	96	1876	890	0	-	5	553,22,70,136,109,	3,556,578,648,784,	96,732,866,1087,1767,
HS_102:1507|8271a0be-966f-4727-a84e-c1320512e17f	1415	2	1415	TRINITY_DN1144_c1_g1_i3	1790	306	1790	1411	2	+	4	185,1149,13,66,	2,187,1336,1349,	306,560,1710,1724,
HS_83:684|698fc9cb-2c4a-4a34-95d8-82fe0f77e413	611	0	611	TRINITY_DN7331_c1_g1_i3	2967	1248	2147	609	2	+	3	39,7,565,	0,39,46,	1248,1314,1582,
HS_92:794|f0ffec00-4b8b-4c81-a907-93a41039615f	699	0	699	TRINITY_DN25533_c0_g1_i1	965	13	712	694	2	-	4	13,68,278,337,	0,14,84,362,	13,26,94,375,
HS_107:1735|64775f8c-189f-4e86-aba7-a00d6d66be93	1646	1	1646	TRINITY_DN1684_c1_g1_i1	2382	206	2241	1631	14	-	2	1552,93,	0,1552,	206,2148,
HS_85:470|1e5c8800-bc10-45cc-b5b0-d8fe8efac8d4	389	1	389	TRINITY_DN155389_c0_g1_i1	423	28	418	387	1	-	2	20,368,	0,20,	28,50,
HS_89:1077|fae3d7d2-be01-4285-8f3e-f3830f373262	1009	1	1009	TRINITY_DN533_c0_g1_i4	4338	3	1011	999	9	-	1	1008,	0,	3,
HS_100:336|4ef07cef-fc27-4c1c-ae06-4a082f1ffd79	236	0	236	TRINITY_DN8658_c0_g1_i14	3858	2362	2600	234	1	+	3	57,120,58,	0,58,178,	2362,2421,2542,
HS_93:459|ed90f4d6-c86d-4217-82a3-1788408c070e	366	0	366	TRINITY_DN23245_c0_g1_i1	974	410	780	363	1	+	6	8,110,14,12,113,107,	0,8,118,134,146,259,	410,419,530,544,559,673,
HS_91:1402|285fc4ff-c2bd-4837-89b6-b0962ba4a6ea	1315	0	1314	TRINITY_DN3476_c0_g1_i3	1709	127	1647	1306	3	+	4	110,42,24,1133,	0,110,157,181,	127,240,293,514,
HS_106:2174|0713197a-2a6b-404f-9a04-84522cb5d737	2092	0	2089	TRINITY_DN55488_c0_g1_i2	2345	128	2224	2076	10	+	7	17,14,36,11,1972,30,6,	0,18,33,69,80,2052,2083,	128,145,161,202,215,2188,2218,
HS_88:705|dbb68e51-6445-4d98-ac05-c90231f69e41	612	0	611	TRINITY_DN676_c0_g2_i1	890	116	818	606	4	-	4	372,133,35,70,	1,374,507,542,	116,578,712,748,
HS_91:1686|491f8747-4ff9-4e53-9ead-a00c2a9da33c	1622	0	1618	TRINITY_DN14868_c0_g1_i2	1841	6	1624	1615	2	-	3	35,123,1459,	4,39,163,	6,42,165,
HS_111:1648|7b4b7262-4c1b-4562-899f-2dccab9948a8	1562	0	1562	TRINITY_DN41201_c0_g2_i1	1796	3	1746	1551	11	-	5	25,4,130,4,1399,	0,25,29,159,163,	3,194,199,342,347,
HS_88:1499|a0e10510-6b37-4785-8d66-80e7fa5c975d	1426	0	1425	TRINITY_DN2831_c0_g2_i2	2177	703	2150	1418	7	-	5	454,700,249,13,9,	1,455,1155,1404,1417,	703,1158,1861,2127,2141,
HS_96:1375|6a843621-0630-46ed-b7e6-0741b8972402	1288	2	1284	TRINITY_DN13793_c0_g1_i1	1500	181	1463	1282	0	-	1	1282,	4,	181,
HS_94:610|941a77cb-35e6-4673-8aba-54bf03e3088b	518	0	518	TRINITY_DN4756_c0_g1_i1	1507	457	991	514	1	+	9	34,8,150,26,40,96,50,106,5,	0,34,43,194,220,261,357,407,513,	457,492,500,650,677,717,816,868,986,
HS_109:3758|6038f197-4a2e-4cd4-91b2-bd0e22c55a3b	3668	2	3661	TRINITY_DN9961_c0_g3_i10	4019	64	3917	3653	6	-	3	184,2684,791,	7,191,2875,	64,344,3126,
HS_104:642|5746916f-fc78-4db6-9621-9e7f59b0300b	538	0	538	TRINITY_DN32492_c0_g2_i1	2114	1433	1988	534	1	+	9	15,46,122,6,206,90,36,9,5,	0,15,62,185,191,398,488,524,533,	1433,1453,1503,1625,1632,1838,1931,1968,1983,
HS_93:1773|8ba4f2e4-c619-4da5-85cb-1a56632b11a2	1704	1	1700	TRINITY_DN2145_c0_g1_i1	1861	63	1762	1698	1	-	1	1699,	4,	63,
HS_105:1372|fc831729-ac3e-4875-a457-9a2b8201c291	1276	2	1274	TRINITY_DN7628_c0_g1_i1	2003	411	1898	1266	3	-	6	11,33,13,630,335,247,	2,15,49,62,692,1027,	411,423,456,474,1206,1651,
HS_109:1821|2ef17fde-c892-4df0-bdcb-b4bd9c94e98b	1720	2	1713	TRINITY_DN9603_c0_g1_i1	3045	0	1727	1705	4	+	5	16,1496,133,54,10,	2,18,1515,1649,1703,	0,17,1513,1648,1717,
HS_106:327|9f5c10c3-2c26-416e-b6cc-6e85c487f0fa	221	0	221	TRINITY_DN118371_c0_g1_i1	391	149	371	219	2	+	2	138,83,	0,138,	149,288,
HS_110:1407|b3a34367-cb32-4ad1-9132-72fb8ab7ebae	1317	0	1315	TRINITY_DN2872_c0_g1_i32	3257	1135	3203	1312	1	+	4	255,794,115,149,	0,257,1051,1166,	1135,2037,2938,3054,
HS_85:331|04f08999-6a7a-42d6-9589-d2e3145ef8dd	246	1	246	TRINITY_DN17626_c0_g2_i1	4458	1076	1355	245	0	+	2	240,5,	1,241,	1076,1350,
HS_105:580|a4956dff-f2a5-40d2-ac35-473847479f5c	480	2	480	TRINITY_DN9053_c0_g2_i21	5515	2414	3340	477	1	+	5	214,28,38,192,6,	2,216,244,282,474,	2414,2629,2659,2698,3334,
HS_105:1094|1608c482-b247-421d-aa9b-96cc212269d7	997	0	995	TRINITY_DN5285_c0_g1_i5	2991	190	1969	991	4	-	3	478,268,249,	2,480,748,	190,996,1720,
HS_100:1187|961b4dbb-2d49-4d02-aa33-65a08937705a	1101	1	1099	TRINITY_DN575_c0_g3_i1	1599	146	1514	1096	2	-	3	698,6,394,	2,700,706,	146,846,1120,
HS_101:412|b7abcef5-eb8c-4196-b347-578432ada870	312	0	312	TRINITY_DN1_c1_g1_i2	2639	903	2276	311	1	+	2	161,151,	0,161,	903,2125,
HS_88:835|ad105e9a-5243-4c19-b9ad-d01dfdc458ce	757	0	757	TRINITY_DN19229_c0_g1_i1	3007	2105	2958	751	6	-	3	434,38,285,	0,434,472,	2105,2541,2673,
HS_89:666|29feb34f-7515-423d-a129-41bec4c7d195	583	0	583	TRINITY_DN4996_c0_g1_i12	5111	1520	2106	581	2	+	3	246,52,285,	0,246,298,	1520,1768,1821,
HS_102:525|e5e5f9ae-5bab-47f0-9439-488bc4f309f2	438	0	438	TRINITY_DN1438_c1_g1_i20	2590	1951	2474	437	1	+	3	171,39,228,	0,171,210,	1951,2205,2246,
HS_105:6816|be5fc274-bec5-473e-a449-90f07068bce6	6840	3	6831	TRINITY_DN15083_c0_g1_i1	6933	40	6868	6827	1	+	1	6828,	3,	40,
HS_85:322|d570b08a-ea2e-4016-bccb-8cf5a6879525	238	0	238	TRINITY_DN50284_c0_g1_i1	537	175	415	237	1	-	3	14,12,212,	0,14,26,	175,190,203,
HS_96:1425|b6ace252-b900-447b-a1c6-54b195acbb48	1352	0	1352	TRINITY_DN4552_c2_g1_i5	1608	253	1608	1340	12	-	3	19,761,572,	0,19,780,	253,274,1036,
HS_92:792|7f6bdd93-7edc-40fd-96d9-6fcff90b3159	703	0	703	TRINITY_DN19451_c0_g1_i5	3601	2584	3554	700	3	-	3	88,91,524,	0,88,179,	2584,2936,3030,
HS_84:1622|2704be36-d474-47d9-8085-7458940f60ec	1547	0	1542	TRINITY_DN3218_c0_g2_i1	1953	7	1904	1539	1	-	3	17,538,985,	5,24,562,	7,25,919,
HS_86:311|f1fc7706-4cc9-4e4d-b1b9-6e0df460aeb8	232	0	232	TRINITY_DN8967_c0_g1_i1	3841	2815	3241	232	0	-	2	133,99,	0,133,	2815,3142,
HS_103:1983|3c3929c6-abe0-4150-a703-5e1e82152e25	1896	2	1896	TRINITY_DN570_c0_g1_i4	1956	53	1944	1889	1	+	2	1872,18,	2,1878,	53,1926,
HS_100:341|90670a81-dc11-49e6-bc6a-0845fcf9cc5d	245	1	245	TRINITY_DN4076_c0_g1_i4	7803	3820	4232	244	0	-	2	6,238,	0,6,	3820,3994,
HS_90:486|0b137a15-bc66-4240-aa2a-17f5fe130d55	397	0	397	TRINITY_DN19779_c0_g1_i4	3429	1064	1697	396	1	+	2	391,6,	0,391,	1064,1691,
HS_105:1667|d4051be8-c623-44ba-8442-043d6b1332db	1584	3	1584	TRINITY_DN9613_c0_g1_i4	1718	129	1712	1580	1	+	2	45,1536,	3,48,	129,176,
HS_102:2316|e29d35e7-ef45-4685-a594-f598536e6873	2242	3	2236	TRINITY_DN1613_c0_g2_i1	2573	26	2265	2221	3	-	11	30,25,31,7,69,30,30,8,38,40,1916,	6,37,62,93,101,173,205,235,244,282,323,	26,56,83,116,123,197,228,260,270,309,349,
HS_92:1422|7c4e051f-d1aa-4596-818e-ed5557603529	1350	0	1349	TRINITY_DN33922_c0_g1_i1	2265	219	1606	1348	1	+	2	1083,266,	0,1083,	219,1340,
HS_108:1393|66343660-bc5f-4e23-b491-7b97d3b0308a	1294	1	1292	TRINITY_DN6958_c0_g1_i4	2238	204	1810	1282	7	+	6	268,577,262,38,66,78,	1,269,846,1108,1146,1214,	204,572,1324,1587,1666,1732,
HS_91:661|ccccfe36-c2b7-4e6d-a510-df493d737e8b	569	0	568	TRINITY_DN7242_c3_g1_i1	830	57	803	566	2	+	4	51,13,69,435,	0,51,64,133,	57,127,205,368,
HS_76:470|f1843033-65bc-4015-a5fa-9f067d6a148c	410	0	407	TRINITY_DN13385_c0_g1_i9	1567	867	1490	407	0	+	2	8,399,	0,8,	867,1091,
HS_110:975|dbce6821-090d-4e83-aac9-f316aa933119	866	2	866	TRINITY_DN46557_c0_g2_i1	1757	499	1368	862	1	-	5	31,10,214,359,249,	0,31,41,255,615,	499,531,544,760,1119,
HS_90:537|238f4cdd-e09a-4cd7-a45d-64092b3d7833	434	0	434	TRINITY_DN27178_c0_g1_i1	5546	871	1305	430	4	+	1	434,	0,	871,
HS_83:706|f3bb9151-e038-4c05-b301-ff9a0a611854	630	0	630	TRINITY_DN550_c3_g1_i4	1317	567	1307	625	5	+	3	211,406,13,	0,211,617,	567,860,1294,
HS_106:1061|9aca5f2d-af35-4725-8b0f-460e1317c520	959	0	959	TRINITY_DN4800_c0_g1_i55	2230	1252	2224	952	1	+	4	716,213,16,8,	0,716,933,951,	1252,1984,2200,2216,
HS_107:700|d6006ee4-f98b-4594-96de-268f82650589	636	2	636	TRINITY_DN4310_c0_g1_i1	809	135	783	630	4	+	3	16,540,78,	2,18,558,	135,164,705,
HS_99:1220|f80decdc-3a31-4a11-9504-91e4b137b2c5	1130	7	1130	TRINITY_DN3132_c0_g1_i2	1379	28	1168	1121	2	+	2	855,268,	7,862,	28,900,
HS_103:2386|8cffadc4-3fae-4491-bbc0-bea7b73d1eb2	2308	0	2305	TRINITY_DN234_c1_g1_i1	2602	44	2530	2299	1	+	2	1680,620,	0,1685,	44,1910,
HS_91:1637|f96926e6-42df-4ddc-addc-dd612e28d2ce	1546	2	1544	TRINITY_DN4190_c0_g1_i6	2828	347	2635	1538	4	-	2	920,622,	2,922,	347,2013,
HS_100:1186|d59f591c-7aac-46d1-a1df-8dae5044d8b9	1116	0	1112	TRINITY_DN1367_c3_g1_i1	1453	147	1361	1110	2	-	2	173,939,	4,177,	147,422,
HS_89:569|5197664f-e5f7-4c86-9c49-8484838627ce	481	1	480	TRINITY_DN2146_c2_g1_i3	1508	0	844	477	2	+	3	113,244,122,	1,114,358,	0,468,722,
HS_86:2468|ebb8bb77-e472-4ca5-81bd-fcf01cf43fbc	2385	6	2384	TRINITY_DN6910_c0_g1_i4	2884	204	2752	2369	9	-	2	2256,122,	1,2257,	204,2630,
HS_434:1113|31a3a963-b0d6-4243-9402-95747c6cc06d	675	0	675	TRINITY_DN6601_c0_g1_i2	1930	8	1573	672	2	-	2	95,579,	0,96,	8,994,
HS_88:881|7dfb4552-1483-4594-89b7-f6d51598a5cc	800	0	796	TRINITY_DN3388_c0_g1_i1	911	39	867	796	0	+	2	531,265,	0,531,	39,602,
HS_94:466|19121101-208b-4c92-920d-272f08a1a37e	372	0	372	TRINITY_DN35678_c1_g1_i1	1090	530	903	372	0	-	2	177,195,	0,177,	530,708,
HS_132:1214|eee614d0-9153-4fa5-8df6-52752bea20ba	1102	0	1102	TRINITY_DN5256_c0_g1_i26	2210	392	1494	1097	5	+	1	1102,	0,	392,
HS_81:812|9e944ea3-7688-4a07-8940-8b24e7f4b9c3	733	0	732	TRINITY_DN365_c1_g1_i5	2757	1947	2729	727	5	-	2	726,6,	1,727,	1947,2723,
HS_106:1769|2a1d7c2a-e7d6-4541-b9e3-8f455f4bcbef	1674	6	1674	TRINITY_DN11464_c0_g1_i3	2032	15	1839	1662	1	+	3	1252,405,6,	6,1263,1668,	15,1267,1833,
HS_92:1050|aca6c2e9-4a8c-448c-a6a6-bd98be83ecd5	964	0	964	TRINITY_DN365_c1_g1_i5	2757	1481	2447	956	8	-	2	517,447,	0,517,	1481,2000,
HS_98:5216|149c61b8-1655-4c43-baca-1e762c24af23	5125	2	5123	TRINITY_DN4971_c0_g1_i1	5422	0	5125	5117	2	-	5	25,152,75,22,4845,	2,28,180,256,278,	0,27,180,255,280,
HS_87:600|ffd9004c-115b-4abb-98ab-e55b429bf627	520	0	520	TRINITY_DN8315_c0_g1_i1	2986	1	627	517	3	-	2	33,487,	0,33,	1,140,
HS_95:391|8caf7599-797c-4464-852f-df97433b41a9	305	0	304	TRINITY_DN1438_c2_g1_i1	1544	291	1054	304	0	-	2	297,7,	1,298,	291,1047,
HS_101:544|cb6861de-96d2-42d3-94b1-88b37f1cc36c	453	0	453	TRINITY_DN3_c1_g1_i2	1648	339	1209	450	0	-	3	7,433,10,	0,7,443,	339,756,1199,
HS_93:442|132c8b88-bf87-4b57-a39d-e4289780a3e8	350	0	350	TRINITY_DN50346_c1_g1_i12	1610	634	1291	350	0	-	2	6,344,	0,6,	634,947,
HS_102:1748|ed49771b-ba0d-4f50-89d3-bb723949be5c	1654	0	1649	TRINITY_DN473_c1_g1_i5	2049	34	2029	1647	2	-	2	759,890,	5,764,	34,1139,
HS_106:1674|25be4b62-f456-4e47-82d0-8ea03acbd886	1589	2	1586	TRINITY_DN8740_c0_g1_i3	2037	151	1735	1579	5	-	1	1584,	3,	151,
HS_94:869|af1ff030-d12d-48b1-8c20-f7a90a50f297	783	0	780	TRINITY_DN28611_c0_g1_i3	1047	51	1030	778	2	-	3	304,442,34,	3,307,749,	51,544,996,
HS_99:1503|88a6a86f-87c4-487d-9b41-0a2d6f4988c1	1412	0	1407	TRINITY_DN62632_c0_g1_i4	2732	1224	2732	1405	2	+	3	1374,27,6,	0,1374,1401,	1224,2698,2726,
HS_92:313|eb0de8ee-d6a7-47c5-bbad-5038e58c51e9	225	0	225	TRINITY_DN2184_c0_g1_i13	1291	650	1121	225	0	+	2	7,218,	0,7,	650,903,
HS_85:653|7c8983ba-37dd-4787-ad88-6c6ae9db4aab	568	0	568	TRINITY_DN4405_c1_g1_i1	932	76	644	563	4	-	3	408,120,39,	0,409,529,	76,484,605,
HS_104:883|1a3b32f7-22b1-41ed-aee4-b0b00f1e4608	782	2	782	TRINITY_DN17776_c0_g1_i1	2622	110	1613	777	2	+	4	25,732,7,15,	2,27,759,767,	110,858,1591,1598,
HS_89:445|878777e7-6d9e-4d26-beff-8942a5e75290	358	0	355	TRINITY_DN38319_c0_g2_i1	2099	154	519	355	0	-	7	22,3,79,9,3,28,211,	3,25,28,107,116,119,147,	154,178,182,263,274,279,308,
HS_88:695|56d3a007-2d26-476e-8f8c-b90cf9dc370c	609	0	609	TRINITY_DN4996_c0_g1_i12	5111	4091	4701	607	0	-	4	379,92,9,127,	0,379,472,482,	4091,4473,4565,4574,
HS_92:2374|8a0c9d25-d4f4-4e52-b64d-957f1a44b550	2317	7	2313	TRINITY_DN2857_c2_g1_i3	5524	86	2393	2301	5	+	2	1898,408,	7,1905,	86,1985,
HS_100:1354|a1b1cfa7-864f-4122-a90f-f2463f5cbee7	1263	4	1263	TRINITY_DN141_c3_g1_i1	1654	70	1565	1257	2	+	4	44,541,100,574,	4,48,589,689,	70,119,727,991,
HS_99:1437|73379180-c74f-490c-b324-5f0df2e9b7a9	1367	3	1366	TRINITY_DN6363_c0_g1_i1	2726	72	2528	1357	6	-	4	154,3,16,1190,	1,155,158,174,	72,229,234,1338,
HS_86:3728|a5caf4b1-4af8-46e5-9b43-45cbfd52f439	3673	0	3669	TRINITY_DN8500_c0_g1_i9	4619	212	4398	3649	18	+	5	490,2204,98,454,421,	0,490,2694,2792,3248,	212,703,3095,3426,3977,
HS_96:1994|def43371-4c4a-4551-ac5b-570dbff189a0	1898	0	1898	TRINITY_DN849_c0_g1_i5	4612	115	2011	1884	11	+	3	23,314,1558,	0,24,340,	115,138,453,
HS_101:826|e3a69756-c5ab-4af9-ba7f-562b81ba3b18	726	1	726	TRINITY_DN2527_c0_g1_i10	4433	3459	4182	719	2	+	4	467,213,24,17,	1,470,683,709,	3459,3926,4140,4165,
HS_95:842|259aeaa3-e42f-437b-8c9f-feefbcfe68b6	759	4	756	TRINITY_DN2125_c1_g2_i1	1882	177	1740	752	0	+	2	673,79,	4,677,	177,1661,
HS_104:720|8f90bdf8-1eca-41c1-99ef-1cfc4d152154	614	0	614	TRINITY_DN5520_c1_g1_i1	888	14	629	610	2	-	3	28,64,520,	0,29,94,	14,42,109,
HS_90:789|4a50c02f-3a13-4d8b-868f-53b6f5dcdef7	704	1	704	TRINITY_DN4920_c0_g1_i2	740	5	709	698	3	-	3	689,6,6,	0,690,697,	5,697,703,
HS_106:773|f2fa6b72-962a-44fc-bea1-55b861d635c4	661	0	661	TRINITY_DN3571_c0_g1_i1	882	62	724	655	3	+	3	555,78,25,	0,556,636,	62,617,699,
HS_92:3759|9703e72c-59fe-4f0f-a09c-4754dd9dd954	3702	4	3697	TRINITY_DN2863_c2_g1_i1	3938	49	3863	3693	0	-	2	387,3306,	5,392,	49,557,
HS_95:776|d8c8cc26-6f0e-40a7-9806-5f9899118ac1	675	0	675	TRINITY_DN1196_c1_g2_i7	5693	3487	5098	674	0	-	2	122,552,	0,123,	3487,4546,
HS_94:494|5f190707-b1d7-4582-937c-5bc71548a6de	403	0	401	TRINITY_DN4003_c0_g1_i2	1713	0	410	399	2	-	3	23,47,331,	2,25,72,	0,31,79,
HS_91:1703|1cd93224-fdae-4677-b4e8-1bc8b678f415	1648	2	1642	TRINITY_DN473_c1_g1_i5	2049	34	2020	1638	2	-	2	759,881,	6,765,	34,1139,
HS_107:1646|dc067983-ffe9-4298-815c-d0758272c7b5	1560	3	1559	TRINITY_DN1339_c3_g1_i2	1812	148	1715	1554	2	-	2	487,1069,	1,488,	148,646,
HS_89:2929|8b28b90a-0763-4f47-bf96-eed91d8e1b01	2958	1	2953	TRINITY_DN2849_c0_g1_i4	3147	109	3069	2929	18	-	4	26,26,657,2238,	5,34,62,719,	109,141,171,831,
HS_91:426|93c39d1e-3e26-4093-8a27-c57b9227c7e2	344	0	344	TRINITY_DN9053_c1_g1_i3	2847	466	1908	344	0	+	2	66,278,	0,66,	466,1630,
HS_95:836|d4daba7a-9290-42c9-99c6-dbd7d3bb9622	742	0	742	TRINITY_DN12171_c0_g2_i1	2237	585	1330	738	2	+	4	361,60,47,272,	0,361,421,470,	585,948,1011,1058,
HS_97:511|2e454729-d5d9-40bf-bb49-47c2acc20213	416	0	416	TRINITY_DN3940_c0_g1_i1	1551	1004	1549	415	1	+	2	410,6,	0,410,	1004,1543,
HS_104:1446|eb9ae7a6-65d6-47b4-81ab-521effc6941b	1350	3	1350	TRINITY_DN11622_c0_g2_i14	2776	23	1395	1347	0	+	2	769,578,	3,772,	23,817,
HS_91:3218|4f037ae4-8fe6-4ad8-ae9d-4fcbd192f031	3150	0	3133	TRINITY_DN2085_c0_g1_i3	4319	3	3478	3129	4	+	2	3055,78,	0,3055,	3,3400,
HS_102:6374|17fe2104-7748-4065-afcb-e0b2431f5065	6334	16	6330	TRINITY_DN8800_c0_g1_i2	6982	0	6831	6306	7	+	3	1792,70,4451,	16,1808,1879,	0,2310,2380,
HS_47:453|b8fdb3ed-6fb9-4cd8-8aeb-a10dfbd6a299	414	2	414	TRINITY_DN5907_c0_g2_i2	1013	107	709	412	0	-	2	283,129,	0,283,	107,580,
HS_96:645|3d419613-f705-4b9b-997b-fde332d71ef8	549	0	549	TRINITY_DN75561_c0_g1_i1	760	9	563	545	3	-	6	24,125,96,233,56,14,	0,24,149,245,479,535,	9,34,161,258,491,549,
HS_87:2825|c7d7fddd-e630-40db-b455-7e1b722108e1	2754	0	2754	TRINITY_DN282_c0_g1_i2	4125	81	2928	2748	4	-	5	31,26,777,858,1060,	0,33,59,836,1694,	81,112,139,917,1868,
HS_101:1310|e40e962f-1d71-4b0f-ab31-2bd46723ad8a	1218	2	1216	TRINITY_DN13382_c0_g1_i3	1624	133	1513	1212	2	-	3	105,959,150,	2,107,1066,	133,401,1363,
HS_90:945|964841cd-1011-42b9-a18a-9044924d5104	865	0	865	TRINITY_DN1321_c0_g2_i1	1569	45	1063	857	6	-	3	371,207,285,	0,371,580,	45,545,778,
HS_94:1009|493fc552-f4be-4649-8a75-a9a836eef338	915	0	910	TRINITY_DN31874_c0_g1_i17	1376	274	1298	908	2	-	3	120,168,622,	5,125,293,	274,395,676,
HS_96:1767|738e01dc-3d7a-404c-870b-92418b1301f7	1676	0	1671	TRINITY_DN1198_c1_g1_i2	2532	165	2484	1665	5	+	4	413,630,598,29,	0,414,1044,1642,	165,578,1856,2455,
HS_105:811|72888df3-02ba-4b4e-9c1f-12a90570b561	718	2	718	TRINITY_DN4957_c3_g1_i1	830	89	822	714	2	+	2	558,158,	2,560,	89,664,
HS_100:1564|95f99cbc-4a60-4dba-994a-e4071517cebc	1479	0	1475	TRINITY_DN19789_c0_g1_i1	1564	13	1502	1467	8	-	4	10,740,8,717,	4,14,754,762,	13,35,776,785,
HS_92:841|6a5c6eb2-55f4-4321-ae8d-fd3ac4c00c05	754	0	754	TRINITY_DN44_c1_g1_i11	2882	93	872	751	3	+	2	571,183,	0,571,	93,689,
HS_101:1731|c5097a9a-4bfd-4204-9fb6-63ceeebba3d2	1638	0	1633	TRINITY_DN1656_c0_g3_i2	3218	1309	2967	1633	0	-	2	1083,550,	5,1088,	1309,2417,
HS_106:1096|4ac8b7e3-2c56-4f81-86c5-f5d70a224b5c	991	2	989	TRINITY_DN10934_c0_g1_i6	3293	557	1637	983	4	-	2	108,879,	2,110,	557,758,
HS_102:2427|a4f7d49e-167b-470b-910d-587f347d0aca	2342	1	2333	TRINITY_DN3236_c0_g1_i5	2798	0	2332	2332	0	-	1	2332,	9,	0,
HS_94:474|091f3d91-6ad0-44ce-bda6-accb5bbb85d5	380	0	380	TRINITY_DN297_c0_g1_i3	2805	2421	2801	377	1	+	3	361,11,6,	0,363,374,	2421,2782,2795,
HS_100:2103|626caf1b-e52c-4b9e-ae19-1d8f4effcf84	2024	0	2018	TRINITY_DN4120_c2_g1_i1	2084	0	2019	2013	5	-	2	43,1975,	6,49,	0,44,
HS_109:618|8581d6de-3183-421c-beec-de92a2137621	510	1	510	TRINITY_DN17647_c1_g1_i1	1573	5	515	507	2	-	2	68,441,	0,68,	5,74,
HS_106:1451|5574a349-2137-4b25-a708-eb32753edf83	1355	1	1355	TRINITY_DN5399_c0_g1_i2	2722	420	2090	1354	0	+	3	255,1093,6,	1,256,1349,	420,828,2084,
HS_91:1160|4527aa39-c4ac-4634-9005-f27e8d0fe776	1073	6	1073	TRINITY_DN6576_c0_g1_i1	3947	128	2213	1064	3	+	3	791,3,273,	6,797,800,	128,933,1940,
HS_99:1196|c7f7a2f0-9145-4684-bbab-21f162431539	1112	0	1112	TRINITY_DN29946_c0_g1_i1	1405	98	1210	1110	2	-	1	1112,	0,	98,
HS_105:2084|ec330be6-18e5-4ec0-a72e-0dc768d04d09	1983	2	1978	TRINITY_DN1708_c0_g1_i3	2656	35	2007	1969	3	+	2	42,1930,	2,48,	35,77,
HS_111:1712|8b0b8919-5ff5-4c5b-b7af-1de390db969a	1607	2	1604	TRINITY_DN4886_c0_g1_i1	1753	71	1690	1597	4	+	4	170,1201,4,226,	2,172,1374,1378,	71,255,1459,1464,
HS_90:1356|0f0d91fa-2837-4b51-9da9-57f7b6bdedae	1268	0	1267	TRINITY_DN843_c0_g1_i3	2779	28	1833	1265	2	+	3	462,97,708,	0,462,559,	28,934,1125,
HS_94:1569|9e163663-97a1-4f48-b9b2-de427ea09d6d	1494	0	1490	TRINITY_DN13408_c0_g1_i2	2354	43	1534	1482	6	+	6	1068,188,78,6,15,133,	0,1068,1256,1335,1342,1357,	43,1112,1301,1379,1385,1401,
HS_106:2606|f09cd496-d673-4b90-b18f-ab7a8c739086	2514	2	2514	TRINITY_DN14000_c0_g1_i2	2745	171	2688	2506	4	+	2	1207,1303,	2,1211,	171,1385,
HS_89:458|2c54e39e-705a-4685-9da2-abfbf7493679	383	0	383	TRINITY_DN26518_c0_g2_i1	1230	124	1214	383	0	-	2	116,267,	0,116,	124,947,
HS_108:2242|1cdef4a8-21f1-491b-a86e-c616002f1664	2173	3	2171	TRINITY_DN4557_c0_g1_i21	3597	108	3383	2156	12	-	3	690,1369,109,	2,692,2061,	108,1754,3274,
HS_88:1353|ab56fc09-5185-4cda-9fcf-9774773409a3	1288	0	1283	TRINITY_DN2771_c1_g1_i1	1426	9	1380	1277	6	-	2	460,823,	5,465,	9,557,
HS_109:747|be178e51-2950-4feb-9736-76d3c754b7db	639	0	639	TRINITY_DN26193_c0_g2_i1	1388	724	1368	633	2	+	9	336,34,18,6,83,57,10,47,44,	0,336,370,388,394,477,534,546,595,	724,1061,1096,1115,1122,1207,1266,1276,1324,
HS_101:1210|f9b8138e-23ad-4057-8a14-618ac6514c8c	1155	1	1155	TRINITY_DN3285_c1_g1_i3	3612	1000	2345	1150	3	+	2	1097,56,	1,1099,	1000,2289,
HS_86:351|f806f014-dad7-46a2-b58b-b205dda469e0	270	0	270	TRINITY_DN23245_c0_g2_i1	2102	1434	1711	269	1	+	5	14,13,22,17,204,	0,14,27,49,66,	1434,1451,1466,1489,1507,
HS_99:397|cc1da215-623a-4f42-adcb-0d7c1e4b8e41	304	0	304	TRINITY_DN505_c2_g1_i4	1583	630	1006	301	3	-	4	7,51,214,32,	0,7,58,272,	630,702,757,974,
HS_108:1312|44348340-5241-4bd2-9ef2-4e09eb60c0be	1197	6	1197	TRINITY_DN1201_c0_g2_i2	2462	34	1728	1188	2	-	2	1119,71,	0,1120,	34,1657,
HS_103:517|6343ad4c-bbc9-40c4-be55-5a576c601e9e	412	2	412	TRINITY_DN8990_c0_g1_i12	2583	178	1099	408	2	+	3	20,219,171,	2,22,241,	178,289,928,
HS_99:1769|d8b72e54-c6fd-4b59-84b1-e3ecadcd84cb	1680	0	1680	TRINITY_DN5631_c2_g1_i9	2084	393	2083	1670	8	+	5	1431,161,15,45,26,	0,1432,1593,1609,1654,	393,1828,1990,2010,2057,
HS_101:1092|2497ae9d-10f2-4551-b5eb-986c49c1437b	1001	0	994	TRINITY_DN9669_c0_g1_i6	2425	1171	2293	992	2	+	3	12,93,889,	0,12,105,	1171,1256,1404,
HS_97:1034|76baf07b-c283-4191-ae95-927836a7fd6e	942	0	940	TRINITY_DN7954_c0_g1_i1	1811	124	1101	940	0	-	2	856,84,	2,858,	124,1017,
HS_51:1264|dd517e97-361f-4f2b-ae73-c1710c8b6a82	1211	0	1211	TRINITY_DN573_c0_g1_i8	2279	3	1480	1207	4	-	3	7,1010,194,	0,7,1017,	3,29,1286,
HS_87:1951|6a94f04f-3f0a-4762-92c5-5b134163c53b	1887	0	1887	TRINITY_DN1609_c2_g1_i3	4109	1081	4009	1881	6	-	3	761,290,836,	0,761,1051,	1081,1843,3173,
HS_104:1336|afb6230a-beb3-4f71-8b4c-c160cfb1fb26	1262	1	1261	TRINITY_DN5983_c0_g1_i1	1713	3	1352	1257	3	+	3	7,916,337,	1,8,924,	3,17,1015,
HS_102:1771|7cf5f50c-386d-4135-92bd-ea2bcc581133	1691	3	1683	TRINITY_DN293_c0_g1_i15	6137	4283	6066	1676	2	-	5	194,39,1068,354,23,	8,203,243,1311,1665,	4283,4477,4516,5688,6043,
HS_95:453|37566620-90a0-42ce-9c52-0767716082d6	356	0	356	TRINITY_DN3121_c0_g1_i4	1531	410	1034	353	3	+	2	351,5,	0,351,	410,1029,
HS_111:1250|b85455a3-cb37-4df8-8b9e-16453bd1f511	1152	1	1152	TRINITY_DN3731_c0_g1_i7	5410	1960	3208	1146	0	+	2	81,1065,	1,87,	1960,2143,
HS_95:355|2abc96f8-e1f5-4eee-a2da-b6b572c24261	260	0	260	TRINITY_DN20646_c0_g7_i1	2616	1833	2111	258	2	-	5	7,150,69,3,31,	0,7,157,226,229,	1833,1853,2005,2076,2080,
HS_102:3092|c9f14638-63f5-44c0-9e20-84fb74a6a6ae	2995	3	2992	TRINITY_DN29771_c0_g1_i2	3022	31	3022	2980	7	+	4	2940,16,6,25,	3,2944,2960,2967,	31,2971,2988,2997,
HS_101:1288|9145c090-5427-41fc-8d2a-ad2aada96a57	1195	0	1192	TRINITY_DN9316_c0_g1_i15	2719	65	1771	1191	1	-	2	864,328,	3,867,	65,1443,
HS_92:639|26217da2-f8f9-4e47-9077-4da0af90ef60	550	1	550	TRINITY_DN52_c0_g2_i1	1691	77	687	548	1	-	2	478,71,	0,478,	77,616,
HS_90:463|3ab1ba18-2d09-4c4a-b7d4-f315d4309592	386	0	386	TRINITY_DN2899_c1_g1_i1	2663	415	870	385	1	+	2	67,319,	0,67,	415,551,
HS_95:314|5ff13fab-8da6-4d89-8225-948e6b57312f	219	0	219	TRINITY_DN2814_c0_g1_i7	2211	30	256	218	1	-	5	26,5,10,9,169,	0,26,31,41,50,	30,58,65,76,87,
HS_93:1227|a8bc1520-e34b-4343-bbea-1ec78e461ad7	1146	0	1143	TRINITY_DN18946_c0_g1_i48	1681	234	1461	1141	2	+	3	654,70,419,	0,654,724,	234,934,1042,
HS_91:888|90f31001-f474-4b5b-8dc4-8c8c74e3db6f	805	0	803	TRINITY_DN5499_c1_g1_i1	1798	193	1770	802	1	-	2	184,619,	2,186,	193,1151,
HS_96:428|2efc71c3-79e1-43ad-a398-97cd0f53ecc5	333	0	333	TRINITY_DN6668_c1_g1_i1	2168	1569	1911	331	1	+	6	70,60,37,6,46,113,	0,70,130,168,174,220,	1569,1643,1706,1743,1750,1798,
HS_103:368|212041cc-b956-4bac-9d9a-e5f2a9c463c5	270	0	270	TRINITY_DN1249_c0_g1_i14	3761	2831	3103	268	2	+	3	180,30,60,	0,180,210,	2831,3012,3043,
HS_90:495|17e9bc2e-a7a5-459b-ab24-546c0d7ee217	411	0	407	TRINITY_DN3649_c0_g2_i1	1495	1010	1417	407	0	-	1	407,	4,	1010,
HS_104:1436|6bec6b3f-eb7f-4fb4-9a8d-6a963c366707	1338	0	1338	TRINITY_DN482_c2_g1_i1	3296	1212	3240	1333	5	-	4	6,415,3,914,	0,6,421,424,	1212,1662,2317,2326,
HS_103:344|0112cc68-1846-48f2-8021-fc02bc194d92	247	2	247	TRINITY_DN3402_c4_g1_i1	380	67	355	245	0	-	2	5,240,	0,5,	67,115,
HS_101:352|ae831ce6-67ee-4308-a21e-8e29fba578c5	259	0	257	TRINITY_DN25088_c0_g2_i1	3221	2274	2942	257	0	-	2	252,5,	2,254,	2274,2937,
HS_98:2903|aa9d6366-da5c-4678-ba23-cecd42aaa490	2821	0	2817	TRINITY_DN664_c0_g1_i6	3291	321	3170	2796	21	-	4	521,1816,376,104,	4,525,2341,2717,	321,843,2689,3066,
HS_90:553|c8daa9b7-96c0-4df6-8e34-a88729221980	463	0	463	TRINITY_DN30665_c0_g1_i1	1111	143	610	463	0	-	3	40,88,335,	0,40,128,	143,186,275,
HS_27:565|332f11aa-963b-416c-a7cc-74705f591cd6	538	0	536	TRINITY_DN23512_c0_g1_i10	2590	28	1610	533	3	+	2	325,211,	0,325,	28,1399,
HS_102:766|64b71bb8-b2ee-48b5-8231-cd8b15ba426b	674	0	673	TRINITY_DN6955_c0_g1_i1	2749	798	2718	673	0	+	2	506,167,	0,506,	798,2551,
HS_22:875|cff30bff-134d-4a34-bad3-0b2f834a7459	859	0	859	TRINITY_DN12647_c0_g1_i1	1470	19	889	852	2	-	6	19,4,504,36,15,276,	0,19,23,532,568,583,	19,39,47,557,594,613,
HS_104:649|95685fe2-f36a-436d-ab5c-eeac53e7b51d	545	2	545	TRINITY_DN74811_c0_g1_i1	1386	331	874	540	3	-	1	543,	0,	331,
HS_87:344|645f64e5-0c78-4cf9-b81a-a92f413e5f38	257	0	257	TRINITY_DN4814_c1_g1_i12	1867	61	318	257	0	+	1	257,	0,	61,
HS_86:732|16d6ff5e-6db3-4fe0-92af-0c504dbff77a	643	2	643	TRINITY_DN1579_c0_g1_i3	916	60	785	640	1	-	2	371,270,	0,371,	60,515,
HS_48:1383|43f35677-3261-465d-b836-25ab83c6b900	1340	3	1337	TRINITY_DN49839_c0_g1_i1	1604	257	1595	1328	6	-	3	42,1284,8,	3,45,1329,	257,301,1587,
HS_106:1273|0eebda88-1fe1-408c-a7b4-40c6c70cff15	1190	2	1187	TRINITY_DN6110_c0_g1_i1	1416	128	1416	1180	1	+	3	1146,17,18,	2,1152,1169,	128,1276,1398,
HS_98:1657|abb49d97-b4f8-44ed-9b00-b9a483b1d97e	1558	3	1558	TRINITY_DN1079_c0_g2_i7	3666	550	2107	1554	1	-	3	107,1419,29,	0,107,1526,	550,658,2078,
HS_108:2245|baf906b2-a18c-4285-9ef1-cfe87dfd50d9	2240	0	2237	TRINITY_DN604_c0_g1_i6	4921	162	2399	2219	18	+	1	2237,	0,	162,
HS_90:719|22004f01-8fab-4696-bd8a-658dcc56c56d	637	0	637	TRINITY_DN1072_c1_g1_i8	1545	739	1478	637	0	+	3	50,553,34,	0,50,603,	739,890,1444,
HS_98:1511|8d7107bc-69ca-4ae9-befc-f5ff03b4b627	1420	1	1418	TRINITY_DN15115_c0_g1_i1	1558	121	1544	1416	1	+	6	15,1251,6,13,80,52,	1,16,1267,1273,1286,1366,	121,137,1389,1396,1411,1492,
HS_90:423|b4a59955-4048-4b47-85d8-bc04a371564c	331	0	331	TRINITY_DN4067_c0_g1_i1	1266	11	342	329	2	+	1	331,	0,	11,
HS_101:1000|d6c4bb07-0aa6-4d70-a21a-70fbfd08fa16	893	3	893	TRINITY_DN4380_c0_g1_i4	1996	159	1247	889	1	+	3	838,47,5,	3,841,888,	159,998,1242,
HS_109:823|2ba45f34-54e4-4964-8808-7d2c0955b28c	728	0	728	TRINITY_DN19274_c0_g1_i1	1031	148	1019	727	1	-	4	98,474,7,149,	0,98,572,579,	148,248,834,870,
HS_92:583|bd9f6e26-c104-4468-8085-3fdbee015a5f	495	0	495	TRINITY_DN2712_c0_g1_i6	1090	50	792	491	4	+	3	157,332,6,	0,157,489,	50,364,786,
HS_102:322|9a49fa56-3e7b-4522-8233-eae5316c6c66	217	0	217	TRINITY_DN1162_c0_g1_i4	5886	5622	5847	216	1	+	2	10,207,	0,10,	5622,5640,
HS_96:2600|ab689e87-7ae5-4e14-af46-d425d51f07d6	2540	1	2540	TRINITY_DN21109_c0_g1_i4	2738	120	2658	2526	12	+	2	2448,90,	1,2450,	120,2568,
HS_96:4321|864bf084-f0d6-4689-a982-44f5d6010357	4289	0	4286	TRINITY_DN2597_c1_g1_i6	5356	783	5126	4277	7	+	2	1582,2702,	0,1584,	783,2424,
HS_91:3983|d8613f3f-8a9c-4670-9d17-429c16cc84c6	3925	4	3925	TRINITY_DN7913_c0_g1_i3	8411	309	4795	3919	2	+	2	3247,674,	4,3251,	309,4121,
HS_97:721|583223cb-574b-4b6a-bf9d-eeb307dab2d4	632	0	632	TRINITY_DN13354_c0_g1_i12	5175	123	798	626	2	-	4	42,271,172,143,	0,44,317,489,	123,165,436,655,
HS_103:4683|7484a739-212b-44dc-8e03-cfbb4c09e516	4621	3	4621	TRINITY_DN2597_c1_g1_i6	5356	265	5122	4603	7	+	5	272,2182,72,10,2074,	3,275,2457,2529,2547,	265,538,2864,3033,3048,
HS_88:308|522933ff-0d79-4110-9c8a-6eb60da96da0	213	0	213	TRINITY_DN4958_c0_g1_i4	2569	724	955	211	1	-	4	4,62,69,77,	0,4,66,136,	724,729,809,878,
HS_103:1514|3952be1d-2a91-4a36-902a-55d3d74f0b62	1418	1	1418	TRINITY_DN14943_c0_g1_i7	3259	467	1945	1406	3	+	4	15,145,999,250,	1,16,169,1168,	467,484,640,1695,
HS_90:448|b9b34bba-2693-494b-9447-45427af7cdd3	361	0	361	TRINITY_DN11205_c1_g2_i1	693	4	368	359	2	-	4	127,29,19,186,	0,127,156,175,	4,132,162,182,
HS_94:1131|d405c1c9-273f-47c0-b740-e57f797a6293	1048	1	1047	TRINITY_DN5467_c0_g2_i2	1075	0	1046	1044	2	-	1	1046,	1,	0,
HS_100:3630|f7f4eb03-86bb-4fc4-ae30-dcd09a1c6643	3534	3	3534	TRINITY_DN26333_c0_g1_i2	4213	198	3851	3515	15	-	5	166,60,1085,7,2212,	0,166,227,1312,1319,	198,365,425,1512,1639,
HS_76:368|416b62a0-4e52-48d9-aa94-920a6e0a53a6	304	0	304	TRINITY_DN1790_c0_g1_i1	2465	2149	2463	302	1	+	3	9,287,7,	0,9,297,	2149,2165,2456,
HS_103:379|08e8c7f1-4c1a-42e9-a34c-4f7138c3ab30	273	0	273	TRINITY_DN9495_c0_g1_i2	605	246	585	273	0	+	2	268,5,	0,268,	246,580,
HS_91:309|f3ce4cea-f3b2-49b2-b0ac-a6d9e25797f0	221	0	221	TRINITY_DN25088_c0_g2_i1	3221	79	1432	220	1	-	2	36,185,	0,36,	79,1247,
HS_106:1559|d5e18005-0afa-4f6a-a393-3b8758137934	1485	0	1485	TRINITY_DN5194_c0_g1_i1	4090	1436	3146	1482	3	-	3	835,22,628,	0,835,857,	1436,2493,2518,
HS_107:2370|b2fc433a-617e-4f14-97bb-3972b204aac9	2286	6	2286	TRINITY_DN273_c0_g1_i1	4533	125	3942	2268	10	+	3	21,517,1740,	6,29,546,	125,146,2202,
HS_88:958|dbdede5f-72ec-496e-84a2-84f5eeb6ab95	865	1	865	TRINITY_DN5704_c0_g1_i7	7195	6	870	859	5	+	1	864,	1,	6,
HS_100:802|c05e8cc9-2962-4767-b31f-b35c9ab1d17f	708	3	707	TRINITY_DN21763_c0_g1_i1	990	116	951	704	0	-	2	556,148,	1,557,	116,803,
HS_101:376|f1e9533b-b6ff-4c7a-b47d-dd3500183828	276	0	276	TRINITY_DN4729_c0_g1_i14	3002	85	1114	275	1	+	3	6,264,6,	0,6,270,	85,500,1108,
HS_81:4534|f74186c8-b1ff-4b64-9789-ffdad4115960	4459	0	4458	TRINITY_DN2385_c1_g1_i1	8556	3769	8309	4422	6	-	15	2868,41,148,202,39,402,9,40,17,25,23,363,33,10,208,	1,2872,2913,3065,3269,3308,3710,3719,3762,3780,3816,3839,4208,4241,4251,	3769,6637,6680,6831,7036,7076,7479,7489,7533,7550,7583,7607,7978,8012,8101,
HS_90:1091|95093427-f92a-4d11-9199-b6d03c9da66b	1016	3	1012	TRINITY_DN3132_c0_g1_i2	1379	112	1165	1008	1	+	4	153,593,227,36,	3,156,749,976,	112,290,900,1129,
HS_101:1496|8ced29ef-4d2a-4097-b923-40b235c3d38c	1402	3	1402	TRINITY_DN10956_c0_g1_i3	3304	31	1592	1399	0	+	3	272,1120,7,	3,275,1395,	31,462,1585,
HS_91:1360|6de9d2d3-3281-4487-8ddc-8d943ce02413	1290	0	1290	TRINITY_DN4396_c0_g1_i1	1462	20	1315	1280	10	-	3	140,14,1136,	0,140,154,	20,161,179,
HS_99:1031|a39e1e85-afe0-4c29-81d3-91a3c8d0aa97	936	3	935	TRINITY_DN7682_c0_g1_i8	5200	125	1724	927	5	-	3	275,259,398,	1,276,535,	125,822,1326,
HS_86:2158|6195e097-2324-4729-8809-33557ca90374	2124	0	2124	TRINITY_DN12982_c0_g2_i3	2808	397	2797	2114	10	+	3	1198,209,717,	0,1198,1407,	397,1664,2080,
HS_91:1390|1ebc3368-9e4d-4731-800f-721dba7ed1d9	1301	0	1295	TRINITY_DN18784_c0_g1_i3	1746	82	1611	1294	1	+	2	694,601,	0,694,	82,1010,
HS_62:3119|7279faa6-edc5-4797-a83e-eba4a0c0e25c	3076	2	3075	TRINITY_DN1776_c0_g1_i1	4178	76	3334	3063	6	+	3	6,140,2923,	2,8,152,	76,84,411,
HS_94:806|8e9405d7-306a-4531-b99a-c7706517f638	719	0	719	TRINITY_DN7344_c0_g1_i1	976	100	819	713	6	-	1	719,	0,	100,
HS_93:2568|712dbc05-a68d-4454-a109-313a094dc2ef	2480	4	2477	TRINITY_DN667_c0_g1_i4	3029	226	2987	2460	13	-	4	2206,80,76,111,	3,2209,2289,2365,	226,2507,2745,2876,
HS_110:1206|f76cd25f-3c86-4921-b908-8e137935bc7b	1103	3	1102	TRINITY_DN3428_c1_g1_i1	4414	173	2206	1099	0	+	3	957,137,5,	3,960,1097,	173,2061,2201,
HS_100:2140|771227a1-7ecb-462f-9f40-36f224bc13be	2055	0	2041	TRINITY_DN8686_c1_g1_i2	2979	0	2892	2035	3	-	4	17,712,1097,212,	14,34,746,1843,	0,22,1340,2680,
HS_98:1229|2fe85485-2b36-4d85-b86b-8f20e6bb9f5a	1135	2	1135	TRINITY_DN1693_c0_g1_i8	1799	25	1442	1125	7	+	5	251,7,392,111,371,	2,254,261,653,764,	25,276,284,926,1071,
HS_96:928|421d0986-dc17-439f-a90e-2d304ddc44d1	833	2	833	TRINITY_DN365_c1_g1_i5	2757	1484	2315	825	6	-	1	831,	0,	1484,
HS_92:607|9cdb3ddf-c26f-4a8c-bbbf-3347bd1a773e	527	0	527	TRINITY_DN1723_c0_g1_i4	2335	1806	2334	522	0	+	4	487,18,7,10,	0,487,509,517,	1806,2296,2317,2324,
HS_67:1989|74006679-0c0b-4176-8152-4f352a721ad2	1937	3	1936	TRINITY_DN546_c2_g1_i3	2055	93	2055	1924	4	+	4	170,15,13,1730,	3,174,189,206,	93,263,279,325,
HS_112:892|ceeaf54b-8f0b-4fac-b808-0dbfc5d287a6	780	5	780	TRINITY_DN7712_c2_g1_i5	1650	716	1629	773	1	-	7	8,13,4,17,29,582,121,	0,8,21,25,43,72,654,	716,750,764,771,788,821,1508,
HS_88:1166|a5483a70-5130-4a2d-848d-092e04617c50	1089	0	1089	TRINITY_DN3519_c0_g1_i11	5625	1341	2816	1082	7	+	4	741,181,162,5,	0,741,922,1084,	1341,2312,2494,2811,
HS_99:2033|3ec9f740-d00d-4967-ad05-1965e029f414	1953	7	1953	TRINITY_DN11543_c0_g1_i5	1990	39	1990	1942	4	+	2	1934,12,	7,1941,	39,1978,
HS_97:636|f37da41e-6bf8-4a26-bdfe-d47481b33b06	539	0	539	TRINITY_DN19229_c1_g1_i2	1839	800	1337	536	1	-	3	259,31,247,	0,260,292,	800,1059,1090,
HS_89:3548|3d47aa3f-7035-40b2-9bad-50ff0d923747	3489	0	3486	TRINITY_DN6771_c0_g1_i18	4231	158	3642	3474	4	-	5	1516,17,39,13,1893,	3,1520,1541,1580,1596,	158,1674,1691,1731,1749,
HS_102:801|296adb0e-c9bb-4be5-b8a1-5b04994f4e5e	707	0	707	TRINITY_DN2679_c0_g2_i17	2985	2262	2971	702	0	+	2	645,57,	0,650,	2262,2914,
HS_111:972|cd76103f-d102-4a32-a98a-5ca020f0dec9	870	4	869	TRINITY_DN10544_c0_g1_i1	1642	0	999	865	0	+	2	827,38,	4,831,	0,961,
HS_571:1514|56ed5238-94de-424c-86b9-d4a8c799ab8c	934	0	934	TRINITY_DN15047_c0_g1_i5	5219	2790	3720	928	1	+	2	785,144,	0,790,	2790,3576,
HS_104:1094|42967586-68f9-4cce-8298-e4aa322bb418	1000	0	1000	TRINITY_DN444_c0_g2_i1	1568	66	1068	990	7	-	7	44,4,493,27,8,11,410,	0,44,49,542,569,579,590,	66,111,115,610,638,646,658,
HS_40:2172|8e36f7ba-f0f9-40fa-8a0f-725596588ff0	2137	0	2137	TRINITY_DN36386_c0_g1_i3	2329	29	2174	2135	2	+	3	16,22,2099,	0,16,38,	29,46,75,
HS_92:547|617e00c7-61ca-49c7-80dc-3244177f0d6c	461	0	459	TRINITY_DN925_c0_g1_i4	1138	640	1138	457	2	+	2	438,21,	0,438,	640,1117,
[truncated: 43,699 more rows]

## Sheet: Supplementary Table S7
Supplementary Table S7. The function annotation of longest assembled contigs
[truncated: 16,433 more rows]

[truncated: 13 more sheets: Supplementary Table S8, Supplementary Table S9, Supplementary Table S10, Supplementary Table S11, Supplementary Table S12, Supplementary Table S13, Supplementary Table S14, Supplementary Table S15, Supplementary Table S16, Supplementary Table S17, Supplementary Table S18, Supplementary Table S19, Supplementary Table S20]
